# Supplementary material for: Changes in Soil Nematode and Microbial Community in Cucumber Root-Zone Soil Shaped by Intercropping with Amaranth
Source: MDPI journal article supplement (doi:10.3390/horticulturae9080924), 2023-08-13
Supplement: s1 [file s1]

Archive with 4 entries (4 files):
- Supplementary Figures S1-S2.pdf
- Supplementary Materials and Methods.pdf
- Supplementary Tables S1-S9.pdf
- Supplementary Tables-Table S10-S11.xlsx
