# Supplementary material for: Changes in Soil Nematode and Microbial Community in Cucumber Root-Zone Soil Shaped by Intercropping with Amaranth
Source: MDPI journal article supplement (doi:10.3390/horticulturae9080924), 2023-08-13
Supplement: s1 [file s1 › Supplementary Tables S1-S9.pdf]

**Table S1 Effects of cultivation system and growing season on soil chemical property.**

| Soil properties | WS season   |              | AW season    |              | Effects |       |       |
|-----------------|-------------|--------------|--------------|--------------|---------|-------|-------|
|                 | C           | CA           | C            | CA           | GS      | CS    | GS×CS |
| pH              | 6.9±0.03    | 6.84±0.04    | 7.03±0.12    | 6.83±0.05    | 0.179   | 0.010 | 0.106 |
| EC              | 948±45.31   | 949.33±13.05 | 829.33±19.66 | 1320.33±8.02 | 0.000   | 0.000 | 0.000 |
| MN              | 114.87±4.39 | 112.81±0.47  | 113.75±0.36  | 114.19±0.11  | 0.921   | 0.544 | 0.357 |
| AP              | 98.06±3.51  | 103.21±13.6  | 100.54±3.14  | 110.33±6.48  | 0.387   | 0.192 | 0.670 |
| AK              | 458.67±26.3 | 490.67±8.00  | 456.67±11.89 | 534.33±12.55 | 0.004   | 0.000 | 0.002 |
| TN              | 3.53±0.03   | 3.26±0.02    | 2.85±0.05    | 2.84±0.05    | 0.002   | 0.289 | 0.330 |
| SOM             | 58.05±6.52  | 62.09±5.52   | 56.88±7.38   | 53.07±4.00   | 0.096   | 0.967 | 0.184 |

Note: GS: Growing season, CS: Cultivation system, C: cucumber monocropping, CA: cucumber-amaranth intercropping, WS: winter-spring season, AW: autumn-winter season, AP: soil available phosphorus; AK: soil available potassium; TN: total nitrogen, SOM: soil organic matter.

**Table S2 Effects of cultivation system and growing season on soil ionome.**

| Ionome (g/kg) | WS season  |            | AW season  |            | Effects |       |       |
|---------------|------------|------------|------------|------------|---------|-------|-------|
|               | C          | CA         | C          | CA         | GS      | CS    | GS×CS |
| P             | 4.03±0.05  | 3.9±0.08   | 3.4±0.02   | 3.54±0     | 0.000   | 0.792 | 0.005 |
| K             | 18.54±1.13 | 19.19±0.48 | 19.05±0.24 | 18.78±0.34 | 0.915   | 0.688 | 0.340 |
| Ca            | 21.1±0.13  | 20.32±0.88 | 20.01±0.02 | 18.53±0.5  | 0.004   | 0.014 | 0.355 |
| Mg            | 8.81±0.95  | 8.85±0.4   | 8.61±0.59  | 6.94±0.59  | 0.055   | 0.123 | 0.106 |
| S             | 0.84±0.03  | 0.79±0.03  | 0.66±0.01  | 0.92±0.18  | 0.734   | 0.134 | 0.045 |
| Cu            | 0.04±0     | 0.04±0     | 0.03±0     | 0.03±0     | 0.000   | 0.023 | 0.014 |
| Fe            | 28.38±1.44 | 27.92±0.69 | 27.23±0.43 | 26.37±0.49 | 0.058   | 0.307 | 0.753 |
| Mn            | 0.51±0.01  | 0.51±0.02  | 0.48±0.01  | 0.48±0     | 0.007   | 0.878 | 0.885 |
| Na            | 13.3±0.5   | 13.72±0.16 | 13.9±0.18  | 13.75±0.39 | 0.226   | 0.583 | 0.268 |
| Zn            | 0.18±0     | 0.17±0     | 0.16±0     | 0.16±0     | 0.000   | 0.009 | 0.664 |
| Al            | 40.06±7.43 | 41.58±1.06 | 42.89±4.2  | 30.16±3.45 | 0.227   | 0.125 | 0.061 |
| Ba            | 0.46±0.03  | 0.46±0     | 0.48±0.01  | 0.45±0     | 0.633   | 0.191 | 0.316 |
| Co            | 0.01±0     | 0.01±0     | 0.01±0     | 0.01±0     | 0.001   | 0.176 | 0.053 |
| Cr            | 0.4±0.01   | 0.43±0.02  | 0.35±0.01  | 0.34±0.01  | 0.000   | 0.256 | 0.063 |
| La            | 0.01±0     | 0.01±0     | 0.01±0     | 0.01±0     | 0.416   | 0.093 | 0.117 |
| Li            | 0.02±0     | 0.02±0     | 0.02±0     | 0.02±0     | 0.026   | 0.189 | 0.948 |
| Ni            | 0.03±0.01  | 0.02±0     | 0.02±0     | 0.02±0     | 0.057   | 0.166 | 0.103 |
| Pb            | 0.03±0     | 0.03±0     | 0.03±0     | 0.03±0     | 0.531   | 0.324 | 0.256 |
| Sc            | 0.01±0     | 0.01±0     | 0.01±0     | 0.01±0     | 0.090   | 0.083 | 0.109 |
| Sr            | 0.27±0.02  | 0.27±0     | 0.27±0.01  | 0.23±0.01  | 0.070   | 0.118 | 0.095 |
| Ti            | 3.1±0.05   | 2.98±0.04  | 2.96±0.05  | 3.05±0.1   | 0.468   | 0.713 | 0.053 |
| V             | 0.06±0     | 0.06±0     | 0.06±0     | 0.06±0     | 0.264   | 0.477 | 0.113 |

Note: GS: Growing season, CS: Cultivation system, C: cucumber monocropping, CA: cucumber-amaranth intercropping, WS: winter-spring season, AW: autumn-winter season.

**Table S3 Changes in the abundances (individuals per 100 g soil) of nematode functional guilds.**

| Guild <sup>a</sup> | Treatment | Growing seasons |             | Effects |       |       |
|--------------------|-----------|-----------------|-------------|---------|-------|-------|
|                    |           | WS              | AW          | GS      | CS    | GS×CS |
| Ba1                | C         | 17.57±5.26      | 2.29±0.47a  | 0.002   | 0.971 | 0.629 |
|                    | CA        | 19.89±8.88      | 0.3±0.18b   |         |       |       |
| Ba2                | C         | 25.79±1.88      | 7.86±1.87b  | 0.000   | 0.112 | 0.593 |
|                    | CA        | 28.59±4.56      | 13.25±0.28a |         |       |       |
| Ba3                | C         | 1.17±0.18       | 1.64±0.6a   | 0.263   | 0.097 | 0.037 |
|                    | CA        | 1.39±0.33       | 0±0b        |         |       |       |
| Ba4                | C         | 0±0             | 0.71±0.46   | 0.731   | 0.731 | 0.038 |
|                    | CA        | 0.96±0.54       | 0±0         |         |       |       |
| Fu2                | C         | 1.66±0.89       | 0.26±0.26   | 0.038   | 0.545 | 0.390 |
|                    | CA        | 3.09±2.03       | 0±0         |         |       |       |
| OP3                | C         | 0±0             | 0±0         | 0.260   | 0.260 | 0.260 |
|                    | CA        | 1.19±1.19       | 0±0         |         |       |       |
| OP4                | C         | 0.67±0.67       | 0.6±0.36    | 0.058   | 0.090 | 0.065 |
|                    | CA        | 5.27±2.65       | 0.36±0.12   |         |       |       |
| OP5                | C         | 0±0             | 0±0         | 0.755   | 0.089 | 0.755 |
|                    | CA        | 0.34±0.34       | 0.48±0.28   |         |       |       |
| PP2                | C         | 4.47±0.81b      | 5.63±2.64   | 0.052   | 0.814 | 0.017 |
|                    | CA        | 9.89±1.49a      | 1.05±0.49   |         |       |       |
| PP3                | C         | 50.69±5.24a     | 1.93±0.32a  | 0.000   | 0.001 | 0.002 |
|                    | CA        | 27.8±3.42b      | 0.24±0.07b  |         |       |       |

Note: Guild<sup>a</sup> refers to feeding habits & c-p value, GS: Growing season, CS: Cultivation system, C: cucumber monocropping, CA: cucumber-amaranth intercropping, WS: winter-spring season, AW: autumn-winter season.

**Table S4 The mean proportion (%) of various nematodes on genus level in cucumber root-zone soil under monocropping and intercropping system.**

| Trophic groups | C-p value | Genus                    | WS season |       | AW season |       |
|----------------|-----------|--------------------------|-----------|-------|-----------|-------|
|                |           |                          | C         | CA    | C         | CA    |
| Ba             | 1         | <i>Protorhabditis</i>    | 4.32      | 0.96  | 1.43      | 0.47  |
| Ba             | 1         | <i>Rhabditis</i>         | 11.75     | 13.88 | 6.25      | 0.71  |
| Ba             | 1         | <i>Pseudodiplogaster</i> | 1.00      | 2.35  | 0.00      | 0.00  |
| Ba             | 1         | <i>Panagrolaimus</i>     | 0.51      | 1.45  | 0.72      | 0.00  |
| Ba             | 1         | <i>Plectonchus</i>       | 0.00      | 0.00  | 0.77      | 0.00  |
| Ba             | 1         | <i>Mesorhabditis</i>     | 0.00      | 1.25  | 0.00      | 0.00  |
| Ba             | 2         | <i>Acrobeloides</i>      | 12.82     | 11.17 | 30.80     | 50.20 |
| Ba             | 2         | <i>Eucephalobus</i>      | 1.15      | 0.99  | 0.24      | 0.50  |
| Ba             | 2         | <i>Caenorhabditis</i>    | 2.82      | 4.31  | 0.00      | 0.00  |
| Ba             | 2         | <i>Cervidellus</i>       | 1.84      | 3.97  | 4.05      | 5.25  |
| Ba             | 2         | <i>Chiloplacus</i>       | 0.00      | 0.31  | 3.79      | 14.35 |
| Ba             | 2         | <i>Cephalobus</i>        | 0.00      | 2.32  | 7.83      | 5.63  |
| Ba             | 2         | <i>Acrobeles</i>         | 0.00      | 0.00  | 0.95      | 1.20  |
| Ba             | 2         | <i>monhystera</i>        | 0.00      | 0.34  | 0.00      | 0.00  |
| Ba             | 2         | <i>chronogaster</i>      | 0.00      | 1.05  | 0.00      | 0.00  |
| Ba             | 3         | <i>Prismatolaimus</i>    | 0.32      | 0.34  | 2.37      | 0.00  |
| Ba             | 3         | <i>Cylindrolaimus</i>    | 0.84      | 0.74  | 0.91      | 0.00  |
| Ba             | 3         | <i>bastiania</i>         | 0.00      | 0.31  | 0.00      | 0.00  |
| Ba             | 4         | <i>Alaimus</i>           | 0.00      | 0.96  | 0.71      | 0.00  |
| Fu             | 2         | <i>Aphelenchus</i>       | 7.16      | 4.14  | 7.34      | 15.64 |
| Fu             | 2         | <i>Aphelenchoides</i>    | 0.65      | 1.67  | 0.26      | 0.00  |
| Fu             | 2         | <i>Ditylenchus</i>       | 0.00      | 0.40  | 0.00      | 0.00  |
| Fu             | 2         | <i>Paraphelenchus</i>    | 1.01      | 1.02  | 0.00      | 0.00  |
| OP             | 3         | <i>tripyla</i>           | 0.00      | 0.40  | 0.00      | 0.00  |
| OP             | 3         | <i>trischistom</i>       | 0.00      | 0.79  | 0.00      | 0.00  |
| OP             | 4         | <i>Mylonchulus</i>       | 0.67      | 5.27  | 1.19      | 0.00  |
| OP             | 4         | <i>Microdorylaimus</i>   | 0.00      | 0.00  | 0.00      | 0.72  |
| OP             | 5         | <i>Nygolaimus</i>        | 0.00      | 0.34  | 0.00      | 0.48  |
| PP             | 2         | <i>Tylenchus</i>         | 0.83      | 1.02  | 1.21      | 0.00  |
| PP             | 2         | <i>Malenchus</i>         | 0.00      | 0.99  | 0.00      | 0.00  |
| PP             | 2         | <i>Filenchus</i>         | 0.00      | 3.83  | 0.24      | 0.47  |
| PP             | 2         | <i>Cephalenchus</i>      | 3.31      | 3.37  | 2.40      | 2.68  |
| PP             | 2         | <i>coslenchus</i>        | 0.32      | 0.00  | 0.00      | 0.00  |
| PP             | 2         | <i>Psilenchus</i>        | 0.00      | 0.68  | 0.00      | 0.00  |
| PP             | 3         | <i>Pratylenchus</i>      | 1.01      | 0.68  | 0.00      | 0.00  |
| PP             | 3         | <i>Rotylenchus</i>       | 0.34      | 0.71  | 14.26     | 0.00  |
| PP             | 3         | <i>Merlinius</i>         | 6.28      | 8.79  | 0.00      | 0.00  |
| PP             | 3         | <i>Helicotylenchus</i>   | 0.00      | 0.00  | 2.16      | 1.69  |
| PP             | 3         | <i>Pararotylenchus</i>   | 0.00      | 0.00  | 1.41      | 0.00  |
| PP             | 3         | <i>Tylenchorhynchus</i>  | 22.66     | 11.70 | 3.31      | 0.00  |

|    |   |                        |       |      |      |      |
|----|---|------------------------|-------|------|------|------|
| PP | 3 | <i>Meloidogyne</i>     | 11.50 | 5.13 | 2.82 | 0.00 |
| PP | 3 | <i>Dolichorhynchus</i> | 8.91  | 0.79 | 0.00 | 0.00 |
| PP | 3 | <i>Nagelus</i>         | 0.00  | 0.00 | 1.41 | 0.00 |
| PP | 3 | <i>Paratylenchus</i>   | 0.00  | 0.00 | 1.19 | 0.00 |

Note: GS: Growing season, CS: Cultivation system, C: cucumber monocropping, CA: cucumber-amaranth intercropping, WS: winter-spring season, AW: autumn-winter season. Nematode trophic groups: bacterivores (Ba), fungivores (Fu), omnivore–predators (OP) and plant parasites (PP).

**Table S5 Effects of cultivation system and growing season on soil nematode diversity and maturity indices.**

| Indices         | Treatments | Growing season |           | Effects |       |       |
|-----------------|------------|----------------|-----------|---------|-------|-------|
|                 |            | WS             | AW        | GS      | CS    | GS×CS |
| H'              | C          | 2.37±0.11      | 2.24±0.33 | 0.000   | 0.166 | 0.002 |
|                 | CA         | 2.69±0.15      | 1.58±0.15 |         |       |       |
| Total genus (S) | C          | 16.33±0.58     | 18.5±2.65 | 0.000   | 0.943 | 0.000 |
|                 | CA         | 24±2.65        | 11±1.63   |         |       |       |
| Hmax(lnS)       | C          | 2.79±0.03      | 2.91±0.14 | 0.000   | 0.323 | 0.000 |
|                 | CA         | 3.17±0.11      | 2.39±0.15 |         |       |       |
| J'(Evenness)    | C          | 0.15±0.01      | 6.34±0.59 | 0.000   | 0.002 | 0.002 |
|                 | CA         | 0.11±0.01      | 4.58±0.4  |         |       |       |
| GR              | C          | 3.43±0.16      | 3.76±0.57 | 0.000   | 0.981 | 0.000 |
|                 | CA         | 5.03±0.48      | 2.15±0.37 |         |       |       |
| λ               | C          | 0.14±0.01      | 0.19±0.08 | 0.000   | 0.191 | 0.01  |
|                 | CA         | 0.09±0.02      | 0.31±0.04 |         |       |       |
| MI              | C          | 0.79±0.17      | 1.37±0.37 | 0.000   | 0.003 | 0.514 |
|                 | CA         | 1.18±0.06      | 1.92±0.05 |         |       |       |
| PPI             | C          | 1.61±0.3       | 0.74±0.44 | 0.000   | 0.003 | 0.873 |
|                 | CA         | 1.03±0.14      | 0.11±0.08 |         |       |       |
| PPI/MI          | C          | 2.18±0.96      | 0.64±0.5  | 0.002   | 0.007 | 0.220 |
|                 | CA         | 0.88±0.09      | 0.06±0.05 |         |       |       |
| MI25            | C          | 0.61±0.09      | 1.28±0.39 | 0.000   | 0.003 | 0.331 |
|                 | CA         | 0.98±0.19      | 1.91±0.05 |         |       |       |

Note: GS: Growing season, CS: Cultivation system, C: cucumber monocropping, CA: cucumber-amaranth intercropping, WS: winter-spring season, AW: autumn-winter season. The diversity indices including H' (Shanon-Weiner index), Total genus (S), Hmax(lnS), J'(Evenness), GR and λ; The maturity indices including MI, PPI, PPI/MI, MI25.

**Table S6 Results of Kruskal-Wallis test the abundance of bacterial taxa at phylum level.**

| WS season               |            |            |        | AW season               |            |            |        |
|-------------------------|------------|------------|--------|-------------------------|------------|------------|--------|
| phylum                  | C          | CA         | P      | phylum                  | C          | CA         | P      |
| <i>Acidobacteriota</i>  | 9.09±0.98  | 8.45±1.34  | 0.5127 | <i>Acidobacteriota</i>  | 11.47±1.79 | 8.04±2.17  | 0.1266 |
| <i>Actinobacteriota</i> | 17.76±0.36 | 19.83±1.18 | 0.0495 | <i>Actinobacteriota</i> | 18.59±1.18 | 19.52±1.94 | 0.2752 |
| <i>Bacteroidota</i>     | 2.28±0.2   | 2.4±0.17   | 0.8273 | <i>Bacteroidota</i>     | 2.11±0.42  | 2.34±0.11  | 0.5127 |
| <i>Chloroflexi</i>      | 15.32±0.88 | 15.18±0.3  | 0.8273 | <i>Chloroflexi</i>      | 15.46±0.6  | 14.46±0.92 | 0.2752 |
| <i>Crenarchaeota</i>    | 7.86±1.47  | 7.06±0.79  | 0.2752 | <i>Crenarchaeota</i>    | 2.78±0.65  | 4.15±1.07  | 0.2752 |
| <i>Gemmatimonadota</i>  | 4.14±0.2   | 3.97±0.22  | 0.2752 | <i>Gemmatimonadota</i>  | 4.87±0.41  | 4.96±0.23  | 0.5127 |
| <i>Methyloirabilota</i> | 0.96±0.11  | 1±0.13     | 0.5127 | <i>Methyloirabilota</i> | 1.32±0.11  | 1.01±0.08  | 0.0495 |
| <i>Myxococcota</i>      | 2.01±0.22  | 2.02±0.19  | 0.8273 | <i>Myxococcota</i>      | 2.32±0.26  | 2.5±0.23   | 0.8273 |
| <i>Planctomycetota</i>  | 6.26±0.29  | 5.53±1.04  | 0.5127 | <i>Planctomycetota</i>  | 6±1.25     | 5.08±1.46  | 0.5127 |
| <i>Proteobacteria</i>   | 18.74±0.73 | 20.34±0.82 | 0.1266 | <i>Proteobacteria</i>   | 18.73±1.54 | 20.79±2.21 | 0.2752 |

Note: GS: Growing season, CS: Cultivation system, C: cucumber monocropping, CA: cucumber-amaranth intercropping, WS: winter-spring season, AW: autumn-winter season.

**Table S7 Results of Kruskal-Wallis test of the abundance of fungal taxa at phylum level.**

| WS season                |            |            |        | AW season                |            |            |        |
|--------------------------|------------|------------|--------|--------------------------|------------|------------|--------|
| phylum                   | C          | CA         | P      | phylum                   | C          | CA         | P      |
| <i>Ascomycota</i>        | 65.84±6.11 | 65.86±1.72 | 0.8273 | <i>Ascomycota</i>        | 64.16±1.94 | 75.85±3.47 | 0.0495 |
| <i>Basidiomycota</i>     | 4.28±3.72  | 2.83±1.28  | 0.8273 | <i>Basidiomycota</i>     | 2.44±0.54  | 1.34±0.7   | 0.1840 |
| <i>Chytridiomycota</i>   | 0.69±0.4   | 3.33±1.67  | 0.0495 | <i>Chytridiomycota</i>   | 0.28±0.11  | 0.62±0.25  | 0.1266 |
| <i>Mortierellomycota</i> | 21.32±2.09 | 19.48±2.03 | 0.5127 | <i>Mortierellomycota</i> | 23.39±1.85 | 15.58±2.65 | 0.0495 |
| <i>Rozellomycota</i>     | 1.82±0.48  | 2.16±0.82  | 0.8273 | <i>Rozellomycota</i>     | 0.35±0.04  | 0.71±0.32  | 0.1266 |

Note: GS: Growing season, CS: Cultivation system, C: cucumber monocropping, CA: cucumber-amaranth intercropping, WS: winter-spring season, AW: autumn-winter season.

**Table S8 Results of Kruskal-Wallis test of the abundance of bacterial taxa at family level.**

| WS season                     |           |           |        | AW season                        |           |           |        |
|-------------------------------|-----------|-----------|--------|----------------------------------|-----------|-----------|--------|
| phylum                        | C         | CA        | P      | phylum                           | C         | CA        | P      |
| <i>Nitrososphaeraceae</i>     | 7.64±0.78 | 7±1.42    | 0.5127 | <i>Bacillaceae</i>               | 4.48±0.47 | 4.91±0.18 | 0.2752 |
| <i>Bacillaceae</i>            | 3.5±0.26  | 3.26±0.12 | 0.2752 | <i>Nitrososphaeraceae</i>        | 2.72±1.04 | 4.07±0.63 | 0.1266 |
| <i>JG30KFCM45</i>             | 3.02±0.06 | 3.26±0.14 | 0.0495 | <i>JG30KFCM45</i>                | 3±0.1     | 3.03±0.08 | 0.8273 |
| <i>Sphingomonadaceae</i>      | 2.22±0.3  | 3.63±0.13 | 0.0495 | <i>Nocardiodaceae</i>            | 2.93±0.62 | 2.87±0.84 | 0.5127 |
| <i>Nocardiodaceae</i>         | 2.5±0.4   | 3.11±0.32 | 0.2752 | <i>Vicinamibacteraceae</i>       | 3.13±0.69 | 2.15±0.51 | 0.1266 |
| <i>Vicinamibacteraceae</i>    | 2.3±0.44  | 2.21±0.25 | 1.0000 | <i>Gemmatimonadaceae</i>         | 2.44±0.17 | 2.63±0.23 | 0.2752 |
| <i>Pirellulaceae</i>          | 2.29±0.44 | 2.14±0.01 | 0.8273 | <i>Gaiellaceae</i>               | 2.17±0.24 | 1.99±0.19 | 0.2752 |
| <i>Gemmatimonadaceae</i>      | 2.15±0.16 | 2.03±0.09 | 0.5127 | <i>Pirellulaceae</i>             | 2.02±0.49 | 1.61±0.43 | 0.5127 |
| <i>Gaiellaceae</i>            | 1.83±0.21 | 1.94±0.09 | 0.8273 | <i>Micromonosporaceae</i>        | 1.53±0.35 | 1.92±0.17 | 0.1266 |
| <i>Micromonosporaceae</i>     | 1.46±0.34 | 1.74±0.29 | 0.2752 | <i>Sphingomonadaceae</i>         | 1.57±0.12 | 1.86±0.14 | 0.0495 |
| <i>Gemmataceae</i>            | 1.5±0.28  | 1.29±0.19 | 0.5127 | <i>norank_o__Actinomarinales</i> | 1.52±0.11 | 1.83±0.07 | 0.0495 |
| <i>Xanthobacteraceae</i>      | 1.25±0.04 | 1.19±0.06 | 0.2752 | <i>Xanthobacteraceae</i>         | 1.38±0.13 | 1.46±0.13 | 0.5127 |
| <i>Thermoactinomycetaceae</i> | 1.19±0.03 | 1.21±0.17 | 0.5127 | <i>6714</i>                      | 1.38±0.18 | 1.4±0.05  | 0.5127 |
| <i>AKYG1722</i>               | 1.07±0.11 | 1.12±0.08 | 0.5127 | <i>Gemmataceae</i>               | 1.57±0.43 | 1.22±0.37 | 0.5127 |
| <i>Geminicoccaceae</i>        | 0.97±0.19 | 1.14±0.05 | 0.2752 | <i>Nitrosomonadaceae</i>         | 1.25±0.11 | 1.32±0.11 | 0.2752 |
| <i>Xanthomonadaceae</i>       | 0.81±0.19 | 1.23±0.02 | 0.0495 | <i>Geminicoccaceae</i>           | 1.22±0.22 | 1.34±0.1  | 0.8273 |
|                               |           |           |        | <i>Methylobacteriaceae</i>       | 0.98±0.16 | 1.19±0.07 | 0.1266 |
|                               |           |           |        | <i>Thermoactinomycetaceae</i>    | 0.88±0.24 | 1.26±0.07 | 0.0495 |

Note: GS: Growing season, CS: Cultivation system, C: cucumber monocropping, CA: cucumber-amaranth intercropping, WS: winter-spring season, AW: autumn-winter season.

**Table S9 Results of Kruskal-Wallis test of the abundance of fungal taxa at family level.**

| WS season                             |            |            |        | AW season                             |            |            |        |
|---------------------------------------|------------|------------|--------|---------------------------------------|------------|------------|--------|
| family                                | C          | CA         | P      | family                                | C          | CA         | P      |
| <i>Mortierellaceae</i>                | 21.32±2.04 | 19.46±2.09 | 0.5127 | <i>Mortierellaceae</i>                | 23.39±2.65 | 15.58±1.85 | 0.0495 |
| <i>Aspergillaceae</i>                 | 16.24±0.84 | 7.76±1.33  | 0.0495 | <i>Nectriaceae</i>                    | 14.02±0.82 | 18.64±2.23 | 0.0495 |
| <i>Plectosphaerellaceae</i>           | 7.49±3.08  | 10.42±2.03 | 0.1266 | <i>Aspergillaceae</i>                 | 8.74±0.49  | 8.81±4.72  | 0.5127 |
| <i>Nectriaceae</i>                    | 6.77±1.21  | 10.86±0.85 | 0.0495 | <i>Chaetomiaceae</i>                  | 5.94±1.17  | 10.76±0.33 | 0.0495 |
| <i>Chaetomiaceae</i>                  | 6.6±0.75   | 6.57±1.13  | 0.8273 | <i>Microascaceae</i>                  | 6.15±3.79  | 9.55±0.7   | 0.1266 |
| <i>Microascaceae</i>                  | 6.45±2     | 5.7±0.96   | 0.5127 | <i>unclassified_k_Fungi</i>           | 7.6±0.42   | 4.78±1.24  | 0.0495 |
| <i>Pyronemataceae</i>                 | 4.88±0.52  | 6.52±2.29  | 0.5127 | <i>Plectosphaerellaceae</i>           | 3.63±0.9   | 6.89±0.58  | 0.0495 |
| <i>unclassified_k_Fungi</i>           | 5.55±0.82  | 5.82±1.02  | 0.8273 | <i>Pyronemataceae</i>                 | 7.73±0.56  | 1.18±2.16  | 0.0495 |
| <i>Cladosporiaceae</i>                | 1.52±0.46  | 4.37±0.47  | 0.0495 | <i>Cladosporiaceae</i>                | 1.27±0.67  | 3.94±0.38  | 0.0495 |
| <i>Gymnoascaceae</i>                  | 3±0.13     | 1.6±0.18   | 0.0463 | <i>Gymnoascaceae</i>                  | 2.67±0.38  | 2.31±0.18  | 0.5127 |
| <i>unclassified_p_Rozellomycota</i>   | 1.81±0.82  | 2.16±0.49  | 0.8273 | <i>unclassified_p_Ascomycota</i>      | 2.22±0.1   | 1.11±0.93  | 0.0495 |
| <i>Entolomataceae</i>                 | 3.21±0.2   | 0.43±3.92  | 0.8273 | <i>unclassified_c_Sordariomycetes</i> | 2.55±0.35  | 0.74±0.59  | 0.0495 |
| <i>unclassified_p_Chytridiomycota</i> | 0.65±1.96  | 2.8±0.38   | 0.0495 | <i>unclassified_o_Sordariales</i>     | 0.17±2.83  | 2.47±0.01  | 0.0495 |
| <i>Hypocreales_fam_Incertae_sedis</i> | 1.69±0.13  | 1.58±0.32  | 0.5127 | <i>Hypocreales_fam_Incertae_sedis</i> | 1.25±0.34  | 1.21±0.17  | 0.5127 |
| <i>unclassified_o_Coniochaetales</i>  | 1.73±0.26  | 0.69±0.89  | 0.1266 | <i>Ascodesmidaceae</i>                | 1.6±0.23   | 0.68±1.56  | 0.8273 |
| <i>Pleosporaceae</i>                  | 1.37±0.2   | 0.98±1.28  | 0.5127 |                                       |            |            |        |

Note: GS: Growing season, CS: Cultivation system, C: cucumber monocropping, CA: cucumber-amaranth intercropping, WS: winter-spring season, AW: autumn-winter season.
