# Supplementary material for: Changes in Soil Nematode and Microbial Community in Cucumber Root-Zone Soil Shaped by Intercropping with Amaranth
Source: MDPI journal article supplement (doi:10.3390/horticulturae9080924), 2023-08-13
Supplement: s1 [file s1 › Supplementary Tables-Table S10-S11.xlsx]

## Sheet: Table S10 Bacterial community
Table S10 The OTU data of bacterial community. WS:Winter-Spring season; AW:Autumn-Winter season; C:Cucumber monocropping; CA:Cucumber-Amaranth intercropping
Domain	Kingdom	Phylum	Class	Order	Family	Genus	Species	OTU	WS-C1	WS-C2	WS-C3	WS-CA1	WS-CA2	WS-CA3	AW-C1	AW-C2	AW-C3	AW-CA1	AW-CA2	AW-CA3	SUM
d__Archaea	k__norank_d__Archaea	p__Crenarchaeota	c__Nitrososphaeria	o__Nitrososphaerales	f__Nitrososphaeraceae	g__Candidatus_Nitrocosmicus	s__uncultured_crenarchaeote_g__Candidatus_Nitrocosmicus	OTU1078	54	42	37	40	32	40	20	35	40	36	56	51	483
d__Archaea	k__norank_d__Archaea	p__Euryarchaeota	c__Methanobacteria	o__Methanobacteriales	f__Methanobacteriaceae	g__Methanobrevibacter	s__unclassified_g__Methanobrevibacter	OTU609	0	1	0	0	0	0	1	0	0	0	0	0	2
d__Archaea	k__norank_d__Archaea	p__Thermoplasmatota	c__Thermoplasmata	o__Marine_Group_II	f__norank_o__Marine_Group_II	g__norank_f__norank_o__Marine_Group_II	s__uncultured_archaeon_g__norank_f__norank_o__Marine_Group_II	OTU4148	8	10	13	10	5	15	5	4	3	2	4	7	86
d__Archaea	k__norank_d__Archaea	p__Iainarchaeota	c__Iainarchaeia	o__Iainarchaeales	f__norank_o__Iainarchaeales	g__Candidatus_Iainarchaeum	s__Diapherotrites_archaeon_SCGC_AAA011-N19	OTU2	2	0	0	0	1	0	0	0	0	0	0	0	3
d__Archaea	k__norank_d__Archaea	p__Crenarchaeota	c__Nitrososphaeria	o__Nitrososphaerales	f__Nitrososphaeraceae	g__Candidatus_Nitrocosmicus	s__uncultured_archaeon_g__Candidatus_Nitrocosmicus	OTU1606	941	832	578	618	793	826	220	292	412	313	568	465	6858
d__Archaea	k__norank_d__Archaea	p__Crenarchaeota	c__Nitrososphaeria	o__Nitrososphaerales	f__Nitrososphaeraceae	g__norank_f__Nitrososphaeraceae	s__unclassified_g__norank_f__Nitrososphaeraceae	OTU2536	28	19	11	13	15	27	1	12	15	12	14	6	173
d__Archaea	k__norank_d__Archaea	p__Nanoarchaeota	c__Nanoarchaeia	o__Woesearchaeales	f__norank_o__Woesearchaeales	g__norank_f__norank_o__Woesearchaeales	s__unclassified_g__norank_f__norank_o__Woesearchaeales	OTU5341	1	0	0	0	0	0	0	0	0	0	1	0	2
d__Archaea	k__norank_d__Archaea	p__Nanoarchaeota	c__Nanoarchaeia	o__Woesearchaeales	f__norank_o__Woesearchaeales	g__norank_f__norank_o__Woesearchaeales	s__unclassified_g__norank_f__norank_o__Woesearchaeales	OTU5342	0	0	0	0	0	0	1	0	0	0	3	0	4
d__Archaea	k__norank_d__Archaea	p__Euryarchaeota	c__Methanobacteria	o__Methanobacteriales	f__Methanobacteriaceae	g__Methanosphaera	s__uncultured_archaeon_g__Methanosphaera	OTU5313	1	1	0	1	1	0	0	0	0	0	1	1	6
d__Archaea	k__norank_d__Archaea	p__Thermoplasmatota	c__Thermoplasmata	o__Methanomassiliicoccales	f__Methanomassiliicoccaceae	g__Methanomassiliicoccus	s__uncultured_archaeon_g__Methanomassiliicoccus	OTU3301	1	1	1	0	0	1	2	0	0	0	0	1	7
d__Archaea	k__norank_d__Archaea	p__Halobacterota	c__Halobacteria	o__Halobacterales	f__Halobacteriaceae	g__norank_f__Halobacteriaceae	s__Halorussus_sp._g__norank	OTU1490	0	0	3	0	0	0	0	0	0	0	0	0	3
d__Archaea	k__norank_d__Archaea	p__Nanoarchaeota	c__Nanoarchaeia	o__Woesearchaeales	f__GW2011_GWC1_47_15	g__norank_f__GW2011_GWC1_47_15	s__unclassified_g__norank_f__GW2011_GWC1_47_15	OTU4609	0	0	0	0	0	0	0	2	0	0	0	0	2
d__Archaea	k__norank_d__Archaea	p__Nanoarchaeota	c__Nanoarchaeia	o__Woesearchaeales	f__norank_o__Woesearchaeales	g__norank_f__norank_o__Woesearchaeales	s__unclassified_g__norank_f__norank_o__Woesearchaeales	OTU5302	0	0	0	0	0	0	0	1	0	0	1	1	3
d__Archaea	k__norank_d__Archaea	p__Thermoplasmatota	c__Thermoplasmata	o__Marine_Group_II	f__norank_o__Marine_Group_II	g__norank_f__norank_o__Marine_Group_II	s__uncultured_archaeon_g__norank_f__norank_o__Marine_Group_II	OTU1815	11	5	4	4	3	8	2	6	1	0	5	5	54
d__Archaea	k__norank_d__Archaea	p__Crenarchaeota	c__Nitrososphaeria	o__Nitrososphaerales	f__Nitrososphaeraceae	g__Candidatus_Nitrocosmicus	s__uncultured_archaeon_g__Candidatus_Nitrocosmicus	OTU2453	1499	1275	973	998	1221	1240	277	310	402	373	721	660	9949
d__Archaea	k__norank_d__Archaea	p__Crenarchaeota	c__Nitrososphaeria	o__Nitrososphaerales	f__Nitrososphaeraceae	g__norank_f__Nitrososphaeraceae	s__unclassified_g__norank_f__Nitrososphaeraceae	OTU738	19	16	15	14	18	17	10	6	9	10	12	9	155
d__Archaea	k__norank_d__Archaea	p__Halobacterota	c__Halobacteria	o__Halobacterales	f__Haloadaptaceae	g__Haladaptatus	s__uncultured_archaeon_g__Haladaptatus	OTU4860	0	0	0	0	0	0	0	0	2	0	0	0	2
d__Archaea	k__norank_d__Archaea	p__Euryarchaeota	c__Methanobacteria	o__Methanobacteriales	f__Methanobacteriaceae	g__Methanobacterium	s__unclassified_g__Methanobacterium	OTU4858	1	0	1	0	0	0	0	0	1	0	0	0	3
d__Archaea	k__norank_d__Archaea	p__Nanoarchaeota	c__Nanoarchaeia	o__Woesearchaeales	f__SCGC_AAA011-D5	g__norank_f__SCGC_AAA011-D5	s__unclassified_g__norank_f__SCGC_AAA011-D5	OTU329	1	1	0	0	0	0	0	1	2	1	0	0	6
d__Archaea	k__norank_d__Archaea	p__Thermoplasmatota	c__Thermoplasmata	o__Marine_Group_II	f__norank_o__Marine_Group_II	g__norank_f__norank_o__Marine_Group_II	s__uncultured_archaeon_g__norank_f__norank_o__Marine_Group_II	OTU3017	0	3	2	0	1	0	0	0	1	0	0	0	7
d__Archaea	k__norank_d__Archaea	p__Nanoarchaeota	c__Nanoarchaeia	o__Woesearchaeales	f__norank_o__Woesearchaeales	g__norank_f__norank_o__Woesearchaeales	s__unclassified_g__norank_f__norank_o__Woesearchaeales	OTU159	0	1	0	1	0	0	0	0	0	0	0	1	3
d__Archaea	k__norank_d__Archaea	p__Nanoarchaeota	c__Nanoarchaeia	o__Woesearchaeales	f__norank_o__Woesearchaeales	g__norank_f__norank_o__Woesearchaeales	s__unclassified_g__norank_f__norank_o__Woesearchaeales	OTU4574	0	0	0	0	0	0	0	1	1	0	0	0	2
d__Archaea	k__norank_d__Archaea	p__Thermoplasmatota	c__Thermoplasmata	o__unclassified_c__Thermoplasmata	f__unclassified_c__Thermoplasmata	g__unclassified_c__Thermoplasmata	s__unclassified_c__Thermoplasmata	OTU120	0	1	0	0	0	0	0	0	0	0	0	1	2
d__Archaea	k__norank_d__Archaea	p__Nanoarchaeota	c__Nanoarchaeia	o__Woesearchaeales	f__norank_o__Woesearchaeales	g__norank_f__norank_o__Woesearchaeales	s__unclassified_g__norank_f__norank_o__Woesearchaeales	OTU4821	2	3	8	3	0	1	1	4	0	0	1	0	23
d__Archaea	k__norank_d__Archaea	p__Nanoarchaeota	c__Nanoarchaeia	o__Woesearchaeales	f__norank_o__Woesearchaeales	g__norank_f__norank_o__Woesearchaeales	s__uncultured_euryarchaeote_g__norank_f__norank	OTU4747	0	0	0	0	0	0	0	2	0	0	0	0	2
d__Archaea	k__norank_d__Archaea	p__Euryarchaeota	c__Methanobacteria	o__Methanobacteriales	f__Methanothermobacteriaceae	g__Methanothermobacter	s__Methanothermobacter_crinale	OTU1329	0	0	1	0	1	0	0	0	0	0	0	0	2
d__Archaea	k__norank_d__Archaea	p__Nanoarchaeota	c__Nanoarchaeia	o__Woesearchaeales	f__GW2011_GWC1_47_15	g__norank_f__GW2011_GWC1_47_15	s__unclassified_g__norank_f__GW2011_GWC1_47_15	OTU1302	0	0	1	0	0	0	1	1	0	0	0	1	4
d__Archaea	k__norank_d__Archaea	p__Thermoplasmatota	c__Thermoplasmata	o__unclassified_c__Thermoplasmata	f__unclassified_c__Thermoplasmata	g__unclassified_c__Thermoplasmata	s__unclassified_c__Thermoplasmata	OTU1089	1	1	1	0	0	0	0	1	1	0	1	3	9
d__Archaea	k__norank_d__Archaea	p__Nanoarchaeota	c__Nanoarchaeia	o__Woesearchaeales	f__norank_o__Woesearchaeales	g__norank_f__norank_o__Woesearchaeales	s__unclassified_g__norank_f__norank_o__Woesearchaeales	OTU4841	1	0	0	0	0	1	0	1	1	0	0	1	5
d__Archaea	k__norank_d__Archaea	p__Crenarchaeota	c__Nitrososphaeria	o__Nitrososphaerales	f__Nitrososphaeraceae	g__Candidatus_Nitrososphaera	s__unclassified_g__Candidatus_Nitrososphaera	OTU1550	228	205	156	134	164	163	54	68	123	75	147	131	1648
d__Archaea	k__norank_d__Archaea	p__Nanoarchaeota	c__Nanoarchaeia	o__Woesearchaeales	f__norank_o__Woesearchaeales	g__norank_f__norank_o__Woesearchaeales	s__unclassified_g__norank_f__norank_o__Woesearchaeales	OTU5466	0	0	0	0	0	0	0	0	0	1	0	0	1
d__Archaea	k__norank_d__Archaea	p__Crenarchaeota	c__Nitrososphaeria	o__Nitrosopumilales	f__Nitrosopumilaceae	g__Candidatus_Nitrosotenuis	s__uncultured_archaeon_g__Candidatus_Nitrosotenuis	OTU693	45	45	28	9	13	12	8	14	15	9	17	18	233
d__Archaea	k__norank_d__Archaea	p__Euryarchaeota	c__Methanobacteria	o__Methanobacteriales	f__Methanobacteriaceae	g__Methanobacterium	s__unclassified_g__Methanobacterium	OTU2457	2	0	0	0	2	0	1	1	0	0	0	0	6
d__Archaea	k__norank_d__Archaea	p__Nanoarchaeota	c__Nanoarchaeia	o__Woesearchaeales	f__norank_o__Woesearchaeales	g__norank_f__norank_o__Woesearchaeales	s__uncultured_bacterium_g__norank_f__norank_o__Woesearchaeales	OTU1508	0	1	1	0	0	0	0	0	1	0	1	0	4
d__Archaea	k__norank_d__Archaea	p__Nanoarchaeota	c__Nanoarchaeia	o__Woesearchaeales	f__norank_o__Woesearchaeales	g__norank_f__norank_o__Woesearchaeales	s__uncultured_euryarchaeote_g__norank_f__norank	OTU5106	1	0	0	0	0	1	1	0	3	1	0	0	7
d__Archaea	k__norank_d__Archaea	p__Nanoarchaeota	c__Nanoarchaeia	o__Woesearchaeales	f__norank_o__Woesearchaeales	g__norank_f__norank_o__Woesearchaeales	s__uncultured_euryarchaeote_g__norank_f__norank	OTU33	1	0	0	0	0	0	0	0	0	0	1	0	2
d__Archaea	k__norank_d__Archaea	p__Crenarchaeota	c__Nitrososphaeria	o__Nitrosotaleales	f__Nitrosotaleaceae	g__norank_f__Nitrosotaleaceae	s__uncultured_archaeon_g__norank_f__Nitrosotaleaceae	OTU1954	0	0	0	0	0	0	0	2	2	2	4	0	10
d__Archaea	k__norank_d__Archaea	p__Nanoarchaeota	c__Nanoarchaeia	o__Woesearchaeales	f__norank_o__Woesearchaeales	g__norank_f__norank_o__Woesearchaeales	s__uncultured_bacterium_g__norank_f__norank_o__Woesearchaeales	OTU4857	0	0	0	0	0	0	0	1	1	0	1	0	3
d__Archaea	k__norank_d__Archaea	p__Crenarchaeota	c__Nitrososphaeria	o__Nitrososphaerales	f__Nitrososphaeraceae	g__Candidatus_Nitrososphaera	s__uncultured_bacterium_g__Candidatus_Nitrososphaera	OTU1567	84	83	46	38	60	63	17	15	44	23	44	49	566
d__Archaea	k__norank_d__Archaea	p__Nanoarchaeota	c__Nanoarchaeia	o__Woesearchaeales	f__SCGC_AAA011-D5	g__norank_f__SCGC_AAA011-D5	s__unclassified_g__norank_f__SCGC_AAA011-D5	OTU5301	1	0	0	0	0	0	0	0	0	0	1	0	2
d__Archaea	k__norank_d__Archaea	p__Thermoplasmatota	c__Thermoplasmata	o__Marine_Group_II	f__norank_o__Marine_Group_II	g__norank_f__norank_o__Marine_Group_II	s__uncultured_archaeon_g__norank_f__norank_o__Marine_Group_II	OTU4179	12	12	18	2	7	9	4	3	1	1	4	2	75
d__Archaea	k__norank_d__Archaea	p__Nanoarchaeota	c__Nanoarchaeia	o__Woesearchaeales	f__norank_o__Woesearchaeales	g__norank_f__norank_o__Woesearchaeales	s__uncultured_bacterium_g__norank_f__norank_o__Woesearchaeales	OTU1656	0	0	1	0	0	0	0	0	1	0	0	1	3
d__Archaea	k__norank_d__Archaea	p__Euryarchaeota	c__Methanobacteria	o__Methanobacteriales	f__Methanobacteriaceae	g__Methanobacterium	s__Methanobacterium_formicicum	OTU2137	1	1	1	1	1	0	0	0	0	0	0	0	5
d__Archaea	k__norank_d__Archaea	p__Nanoarchaeota	c__Nanoarchaeia	o__Woesearchaeales	f__norank_o__Woesearchaeales	g__norank_f__norank_o__Woesearchaeales	s__uncultured_bacterium_g__norank_f__norank_o__Woesearchaeales	OTU5493	0	0	0	0	0	0	1	0	0	0	1	0	2
d__Archaea	k__norank_d__Archaea	p__Halobacterota	c__Halobacteria	o__Halobacterales	f__Haloferacaceae	g__unclassified_f__Haloferacaceae	s__unclassified_f__Haloferacaceae	OTU91	1	0	0	0	0	0	0	0	0	0	0	0	1
d__Archaea	k__norank_d__Archaea	p__Crenarchaeota	c__Nitrososphaeria	o__Nitrososphaerales	f__Nitrososphaeraceae	g__norank_f__Nitrososphaeraceae	s__unclassified_g__norank_f__Nitrososphaeraceae	OTU2178	7	4	1	5	3	1	0	2	1	2	7	4	37
d__Archaea	k__norank_d__Archaea	p__Nanoarchaeota	c__Nanoarchaeia	o__Woesearchaeales	f__norank_o__Woesearchaeales	g__norank_f__norank_o__Woesearchaeales	s__metagenome_g__norank_f__norank_o__Woesearchaeales	OTU5387	0	0	0	0	0	0	1	0	0	0	1	0	2
d__Archaea	k__norank_d__Archaea	p__Nanoarchaeota	c__Nanoarchaeia	o__Woesearchaeales	f__GW2011	g__AR15	s__uncultured_euryarchaeote_g__AR15	OTU4465	1	0	0	0	0	0	2	0	0	0	0	0	3
d__Archaea	k__norank_d__Archaea	p__Halobacterota	c__Methanomicrobia	o__Methanomicrobiales	f__Methanomicrobiaceae	g__Methanoculleus	s__Methanoculleus_thermophilus	OTU238	0	5	0	3	2	2	3	2	0	1	0	1	19
d__Archaea	k__norank_d__Archaea	p__Thermoplasmatota	c__Thermoplasmata	o__Marine_Group_II	f__norank_o__Marine_Group_II	g__norank_f__norank_o__Marine_Group_II	s__uncultured_archaeon_g__norank_f__norank_o__Marine_Group_II	OTU4843	1	1	0	0	0	1	0	1	0	0	0	0	4
d__Archaea	k__norank_d__Archaea	p__Crenarchaeota	c__Nitrososphaeria	o__Nitrososphaerales	f__Nitrososphaeraceae	g__norank_f__Nitrososphaeraceae	s__uncultured_bacterium_g__norank_f__Nitrososphaeraceae	OTU2938	2	0	0	0	2	0	0	0	0	0	0	0	4
d__Archaea	k__norank_d__Archaea	p__Halobacterota	c__Halobacteria	o__Halobacterales	f__Haloferacaceae	g__unclassified_f__Haloferacaceae	s__unclassified_f__Haloferacaceae	OTU1197	0	0	5	0	0	0	0	0	0	1	0	0	6
d__Archaea	k__norank_d__Archaea	p__Thermoplasmatota	c__Thermoplasmata	o__Marine_Group_II	f__norank_o__Marine_Group_II	g__norank_f__norank_o__Marine_Group_II	s__uncultured_archaeon_g__norank_f__norank_o__Marine_Group_II	OTU1752	19	15	6	5	8	11	7	2	1	7	12	5	98
d__Archaea	k__norank_d__Archaea	p__Nanoarchaeota	c__Nanoarchaeia	o__Woesearchaeales	f__norank_o__Woesearchaeales	g__norank_f__norank_o__Woesearchaeales	s__uncultured_euryarchaeote_g__norank_f__norank	OTU4529	0	0	0	0	0	0	0	1	0	0	0	0	1
d__Archaea	k__norank_d__Archaea	p__Nanoarchaeota	c__Nanoarchaeia	o__Woesearchaeales	f__norank_o__Woesearchaeales	g__norank_f__norank_o__Woesearchaeales	s__unclassified_g__norank_f__norank_o__Woesearchaeales	OTU5550	0	0	0	0	0	0	1	1	0	0	0	1	3
d__Archaea	k__norank_d__Archaea	p__Nanoarchaeota	c__Nanoarchaeia	o__Woesearchaeales	f__norank_o__Woesearchaeales	g__norank_f__norank_o__Woesearchaeales	s__unclassified_g__norank_f__norank_o__Woesearchaeales	OTU5081	0	0	0	0	0	0	0	0	0	2	0	0	2
d__Archaea	k__norank_d__Archaea	p__Euryarchaeota	c__Methanobacteria	o__Methanobacteriales	f__Methanobacteriaceae	g__Methanobacterium	s__uncultured_archaeon_g__Methanobacterium	OTU4455	1	0	1	0	0	0	2	0	0	0	0	0	4
d__Archaea	k__norank_d__Archaea	p__Nanoarchaeota	c__Nanoarchaeia	o__Woesearchaeales	f__norank_o__Woesearchaeales	g__norank_f__norank_o__Woesearchaeales	s__uncultured_archaeon_g__norank_f__norank_o__Woesearchaeales	OTU4765	0	0	0	0	0	0	2	1	0	0	0	0	3
d__Archaea	k__norank_d__Archaea	p__Nanoarchaeota	c__Nanoarchaeia	o__Woesearchaeales	f__unclassified_o__Woesearchaeales	g__unclassified_o__Woesearchaeales	s__unclassified_o__Woesearchaeales	OTU4946	0	0	0	0	0	0	0	0	0	1	0	1	2
d__Archaea	k__norank_d__Archaea	p__Halobacterota	c__Methanomicrobia	o__Methanomicrobiales	f__Methanomicrobiaceae	g__Methanoculleus	s__uncultured_Methanoculleus_sp._g__Methanoculleus	OTU16	3	2	0	1	0	1	1	1	0	0	0	0	9
d__Archaea	k__norank_d__Archaea	p__Halobacterota	c__Methanosarcinia	o__Methanosarciniales	f__Methanosarcinaceae	g__Methanosarcina	s__Methanosarcina_mazei_g__Methanosarcina	OTU4755	11	5	1	2	3	4	6	7	2	3	5	11	60
d__Archaea	k__norank_d__Archaea	p__Nanoarchaeota	c__Nanoarchaeia	o__Woesearchaeales	f__norank_o__Woesearchaeales	g__norank_f__norank_o__Woesearchaeales	s__uncultured_archaeon_g__norank_f__norank_o__Woesearchaeales	OTU412	1	0	1	0	0	0	0	0	0	0	1	0	3
d__Archaea	k__norank_d__Archaea	p__Crenarchaeota	c__Nitrososphaeria	o__Nitrosopumilales	f__Nitrosopumilaceae	g__Nitrosarchaeum	s__uncultured_archaeon_g__Nitrosarchaeum	OTU2860	27	33	20	7	6	11	3	7	7	4	13	12	150
d__Archaea	k__norank_d__Archaea	p__Crenarchaeota	c__Nitrososphaeria	o__Nitrososphaerales	f__Nitrososphaeraceae	g__norank_f__Nitrososphaeraceae	s__unclassified_g__norank_f__Nitrososphaeraceae	OTU1935	236	200	139	143	185	144	90	97	140	66	141	123	1704
d__Archaea	k__norank_d__Archaea	p__Thermoplasmatota	c__Thermoplasmata	o__Marine_Group_II	f__norank_o__Marine_Group_II	g__norank_f__norank_o__Marine_Group_II	s__uncultured_archaeon_g__norank_f__norank_o__Marine_Group_II	OTU519	0	1	0	0	0	0	0	1	1	0	0	0	3
d__Archaea	k__norank_d__Archaea	p__Nanoarchaeota	c__Nanoarchaeia	o__Woesearchaeales	f__norank_o__Woesearchaeales	g__norank_f__norank_o__Woesearchaeales	s__unclassified_g__norank_f__norank_o__Woesearchaeales	OTU303	0	2	2	0	1	0	1	1	0	1	3	1	12
d__Archaea	k__norank_d__Archaea	p__Nanoarchaeota	c__Nanoarchaeia	o__Woesearchaeales	f__norank_o__Woesearchaeales	g__norank_f__norank_o__Woesearchaeales	s__uncultured_euryarchaeote_g__norank_f__norank	OTU4438	0	0	1	0	0	0	2	0	0	0	0	0	3
d__Archaea	k__norank_d__Archaea	p__Euryarchaeota	c__Methanobacteria	o__Methanobacteriales	f__Methanobacteriaceae	g__Methanobrevibacter	s__uncultured_archaeon_g__Methanobrevibacter	OTU5598	1	0	0	2	1	0	0	3	1	0	2	4	14
d__Archaea	k__norank_d__Archaea	p__Nanoarchaeota	c__Nanoarchaeia	o__Woesearchaeales	f__unclassified_o__Woesearchaeales	g__unclassified_o__Woesearchaeales	s__unclassified_o__Woesearchaeales	OTU4531	1	0	0	0	0	0	1	1	0	0	0	0	3
d__Archaea	k__norank_d__Archaea	p__Nanoarchaeota	c__Nanoarchaeia	o__Woesearchaeales	f__norank_o__Woesearchaeales	g__norank_f__norank_o__Woesearchaeales	s__uncultured_euryarchaeote_g__norank_f__norank	OTU5323	0	0	0	0	0	0	1	0	0	0	2	0	3
d__Bacteria	k__norank_d__Bacteria	p__Chloroflexi	c__Chloroflexia	o__Thermomicrobiales	f__JG30-KF-CM45	g__norank_f__JG30-KF-CM45	s__unclassified_g__norank_f__JG30-KF-CM45	OTU1052	0	3	1	0	0	0	0	1	0	0	0	0	5
d__Bacteria	k__norank_d__Bacteria	p__Proteobacteria	c__Alphaproteobacteria	o__norank_c__Alphaproteobacteria	f__norank_o__norank_c__Alphaproteobacteria	g__norank_f__norank_o__norank_c__Alphaproteobacteria	s__uncultured_bacterium_g__norank_f__norank_o__norank_c__Alphaproteobacteria	OTU4181	12	19	16	19	15	20	20	15	11	32	10	25	214
d__Bacteria	k__norank_d__Bacteria	p__Proteobacteria	c__Alphaproteobacteria	o__Tistrellales	f__Geminicoccaceae	g__norank_f__Geminicoccaceae	s__uncultured_bacterium_g__norank_f__Geminicoccaceae	OTU3395	13	6	12	8	10	26	17	10	9	16	8	7	142
d__Bacteria	k__norank_d__Bacteria	p__unclassified_k__norank_d__Bacteria	c__unclassified_k__norank_d__Bacteria	o__unclassified_k__norank_d__Bacteria	f__unclassified_k__norank_d__Bacteria	g__unclassified_k__norank_d__Bacteria	s__unclassified_k__norank_d__Bacteria	OTU794	3	6	4	3	9	4	4	4	7	5	3	7	59
d__Bacteria	k__norank_d__Bacteria	p__Proteobacteria	c__Alphaproteobacteria	o__Paracaedibacterales	f__Paracaedibacteraceae	g__Candidatus_Captivus	s__Candidatus_Captivus_acidiprotistae	OTU5400	0	0	0	0	0	0	1	0	0	0	1	1	3
d__Bacteria	k__norank_d__Bacteria	p__Bdellovibrionota	c__Bdellovibrionia	o__Bdellovibrionales	f__Bdellovibrionaceae	g__OM27_clade	s__unclassified_g__OM27_clade	OTU1373	2	0	3	0	1	1	0	3	0	0	2	0	12
d__Bacteria	k__norank_d__Bacteria	p__Chloroflexi	c__Dehalococcoidia	o__S085	f__norank_o__S085	g__norank_f__norank_o__S085	s__unclassified_g__norank_f__norank_o__S085	OTU4890	2	5	7	5	11	7	9	9	6	7	2	15	85
d__Bacteria	k__norank_d__Bacteria	p__Firmicutes	c__Sulfobacillia	o__Sulfobacillales	f__Sulfobacillaceae	g__Sulfobacillus	s__unclassified_g__Sulfobacillus	OTU472	0	0	0	0	0	0	0	0	0	0	1	0	1
d__Bacteria	k__norank_d__Bacteria	p__Actinobacteriota	c__Thermoleophilia	o__Gaiellales	f__norank_o__Gaiellales	g__norank_f__norank_o__Gaiellales	s__unclassified_g__norank_f__norank_o__Gaiellales	OTU482	1	0	0	0	0	0	0	0	0	0	0	0	1
d__Bacteria	k__norank_d__Bacteria	p__Firmicutes	c__Desulfotomaculia	o__Desulfotomaculales	f__norank_o__Desulfotomaculales	g__Desulfofarcimen	s__Desulfofarcimen_intricatum	OTU3333	7	12	9	8	6	3	7	5	5	10	4	3	79
d__Bacteria	k__norank_d__Bacteria	p__Gemmatimonadota	c__S0134_terrestrial_group	o__norank_c__S0134_terrestrial_group	f__norank_o__norank_c__S0134_terrestrial_group	g__norank_f__norank_o__norank_c__S0134_terrestrial_group	s__unclassified_g__norank_f__norank_o__norank_c__S0134_terrestrial_group	OTU3168	1	0	0	0	0	1	1	0	0	1	0	1	5
d__Bacteria	k__norank_d__Bacteria	p__Chloroflexi	c__Anaerolineae	o__Ardenticatenales	f__Ardenticatenaceae	g__norank_f__Ardenticatenaceae	s__uncultured_bacterium_g__norank_f__Ardenticatenaceae	OTU2804	0	1	0	0	1	1	1	0	2	0	0	0	6
d__Bacteria	k__norank_d__Bacteria	p__Verrucomicrobiota	c__Omnitrophia	o__Omnitrophales	f__unclassified_o__Omnitrophales	g__unclassified_o__Omnitrophales	s__unclassified_o__Omnitrophales	OTU2099	0	0	0	1	1	0	0	1	0	0	0	0	3
d__Bacteria	k__norank_d__Bacteria	p__Planctomycetota	c__Phycisphaerae	o__Tepidisphaerales	f__WD2101_soil_group	g__norank_f__WD2101_soil_group	s__uncultured_bacterium_g__norank_f__WD2101_soil_group	OTU4308	8	13	13	11	9	12	14	12	11	5	8	15	131
d__Bacteria	k__norank_d__Bacteria	p__Gemmatimonadota	c__S0134_terrestrial_group	o__norank_c__S0134_terrestrial_group	f__norank_o__norank_c__S0134_terrestrial_group	g__norank_f__norank_o__norank_c__S0134_terrestrial_group	s__uncultured_bacterium_g__norank_f__norank_o__norank_c__S0134_terrestrial_group	OTU853	1	0	1	0	2	2	1	2	2	0	1	1	13
d__Bacteria	k__norank_d__Bacteria	p__Actinobacteriota	c__Acidimicrobiia	o__Microtrichales	f__norank_o__Microtrichales	g__norank_f__norank_o__Microtrichales	s__uncultured_bacterium_g__norank_f__norank_o__Microtrichales	OTU4938	0	0	0	0	0	0	0	1	0	1	0	1	3
d__Bacteria	k__norank_d__Bacteria	p__Acidobacteriota	c__Vicinamibacteria	o__Subgroup_17	f__norank_o__Subgroup_17	g__norank_f__norank_o__Subgroup_17	s__uncultured_Acidobacteriales_bacterium_g__norank_f__norank_o__Subgroup_17	OTU2862	5	14	12	10	15	5	14	20	11	5	4	5	120
d__Bacteria	k__norank_d__Bacteria	p__Bdellovibrionota	c__Oligoflexia	o__Oligoflexales	f__norank_o__Oligoflexales	g__norank_f__norank_o__Oligoflexales	s__uncultured_bacterium_g__norank_f__norank_o__Oligoflexales	OTU1729	0	1	1	1	2	0	0	0	0	0	0	0	5
d__Bacteria	k__norank_d__Bacteria	p__Proteobacteria	c__Alphaproteobacteria	o__Rhizobiales	f__Xanthobacteraceae	g__unclassified_f__Xanthobacteraceae	s__unclassified_f__Xanthobacteraceae	OTU3536	49	45	46	49	42	62	36	28	28	41	38	46	510
d__Bacteria	k__norank_d__Bacteria	p__Verrucomicrobiota	c__Chlamydiae	o__Chlamydiales	f__Parachlamydiaceae	g__Neochlamydia	s__unclassified_g__Neochlamydia	OTU151	2	1	0	0	0	0	0	0	0	0	0	0	3
d__Bacteria	k__norank_d__Bacteria	p__Actinobacteriota	c__Thermoleophilia	o__Gaiellales	f__norank_o__Gaiellales	g__norank_f__norank_o__Gaiellales	s__Gaiella_sp._EBR4-RS1	OTU2065	0	0	1	0	0	1	1	0	0	0	0	0	3
d__Bacteria	k__norank_d__Bacteria	p__Acidobacteriota	c__Thermoanaerobaculia	o__Thermoanaerobaculales	f__Thermoanaerobaculaceae	g__Subgroup_10	s__bacterium_3-5_YC-ZSS-LKJ-3024	OTU763	10	8	6	12	9	7	5	10	10	11	7	8	103
d__Bacteria	k__norank_d__Bacteria	p__Firmicutes	c__Limnochordia	o__MBA03	f__norank_o__MBA03	g__norank_f__norank_o__MBA03	s__uncultured_Clostridia_bacterium_g__norank_f__norank_o__MBA03	OTU4532	1	0	2	1	0	2	0	2	1	0	2	0	11
d__Bacteria	k__norank_d__Bacteria	p__Proteobacteria	c__Gammaproteobacteria	o__Steroidobacterales	f__Steroidobacteraceae	g__Steroidobacter	s__unclassified_g__Steroidobacter	OTU1558	63	90	64	52	63	91	103	99	86	149	131	104	1095
d__Bacteria	k__norank_d__Bacteria	p__Chloroflexi	c__Ktedonobacteria	o__Ktedonobacterales	f__JG30-KF-AS9	g__norank_f__JG30-KF-AS9	s__uncultured_bacterium_g__norank_f__JG30-KF-AS9	OTU4473	0	0	0	0	0	0	0	1	0	0	1	1	3
d__Bacteria	k__norank_d__Bacteria	p__Actinobacteriota	c__Acidimicrobiia	o__unclassified_c__Acidimicrobiia	f__unclassified_c__Acidimicrobiia	g__unclassified_c__Acidimicrobiia	s__unclassified_c__Acidimicrobiia	OTU292	2	3	1	2	3	7	2	1	4	3	3	7	38
d__Bacteria	k__norank_d__Bacteria	p__Patescibacteria	c__Parcubacteria	o__Candidatus_Yanofskybacteria	f__norank_o__Candidatus_Yanofskybacteria	g__norank_f__norank_o__Candidatus_Yanofskybacteria	s__unclassified_g__norank_f__norank_o__Candidatus_Yanofskybacteria	OTU521	0	2	0	0	0	0	0	0	0	0	0	0	2
d__Bacteria	k__norank_d__Bacteria	p__Acidobacteriota	c__Acidobacteriae	o__Acidobacteriales	f__unclassified_o__Acidobacteriales	g__unclassified_o__Acidobacteriales	s__unclassified_o__Acidobacteriales	OTU3858	1	1	4	0	1	0	2	2	3	3	2	2	21
d__Bacteria	k__norank_d__Bacteria	p__Chloroflexi	c__Chloroflexia	o__Chloroflexales	f__Chloroflexaceae	g__FFCH7168	s__uncultured_bacterium_g__FFCH7168	OTU3142	1	0	0	1	0	1	0	0	0	0	0	1	4
d__Bacteria	k__norank_d__Bacteria	p__Bacteroidota	c__Bacteroidia	o__Cytophagales	f__Microscillaceae	g__norank_f__Microscillaceae	s__unclassified_g__norank_f__Microscillaceae	OTU5071	2	0	0	0	0	0	0	0	0	1	0	1	4
d__Bacteria	k__norank_d__Bacteria	p__Actinobacteriota	c__Acidimicrobiia	o__norank_c__Acidimicrobiia	f__norank_o__norank_c__Acidimicrobiia	g__norank_f__norank_o__norank_c__Acidimicrobiia	s__unclassified_g__norank_f__norank_o__norank_c__Acidimicrobiia	OTU5498	0	0	0	0	0	1	1	0	5	0	0	0	7
d__Bacteria	k__norank_d__Bacteria	p__unclassified_k__norank_d__Bacteria	c__unclassified_k__norank_d__Bacteria	o__unclassified_k__norank_d__Bacteria	f__unclassified_k__norank_d__Bacteria	g__unclassified_k__norank_d__Bacteria	s__unclassified_k__norank_d__Bacteria	OTU4024	0	0	1	1	1	0	1	0	0	0	0	0	4
d__Bacteria	k__norank_d__Bacteria	p__Proteobacteria	c__Alphaproteobacteria	o__Reyranellales	f__Reyranellaceae	g__Reyranella	s__uncultured_bacterium_g__Reyranella	OTU4212	5	2	4	3	2	5	3	0	0	2	4	1	31
d__Bacteria	k__norank_d__Bacteria	p__Proteobacteria	c__Alphaproteobacteria	o__Sphingomonadales	f__Sphingomonadaceae	g__Altererythrobacter	s__uncultured_Alphaproteobacteria_bacterium_g__Altererythrobacter	OTU167	4	6	2	6	8	5	0	3	2	4	7	1	48
d__Bacteria	k__norank_d__Bacteria	p__Myxococcota	c__Polyangia	o__Polyangiales	f__BIrii41	g__norank_f__BIrii41	s__unclassified_g__norank_f__BIrii41	OTU11	1	0	0	0	0	0	0	0	0	0	0	0	1
d__Bacteria	k__norank_d__Bacteria	p__Firmicutes	c__Clostridia	o__Peptostreptococcales-Tissierellales	f__Peptostreptococcaceae	g__Paeniclostridium	s__uncultured_bacterium_g__Paeniclostridium	OTU4864	1	2	0	1	4	1	1	1	2	1	1	4	19
d__Bacteria	k__norank_d__Bacteria	p__Verrucomicrobiota	c__Chlamydiae	o__Chlamydiales	f__Parachlamydiaceae	g__Neochlamydia	s__uncultured_bacterium_g__Neochlamydia	OTU1096	1	0	1	0	0	1	0	0	0	1	0	1	5
d__Bacteria	k__norank_d__Bacteria	p__Bacteroidota	c__Bacteroidia	o__Cytophagales	f__Microscillaceae	g__norank_f__Microscillaceae	s__unclassified_g__norank_f__Microscillaceae	OTU2868	0	1	0	1	1	0	2	0	1	1	0	1	8
d__Bacteria	k__norank_d__Bacteria	p__Proteobacteria	c__Gammaproteobacteria	o__Xanthomonadales	f__norank_o__Xanthomonadales	g__norank_f__norank_o__Xanthomonadales	s__uncultured_bacterium_g__norank_f__norank_o__Xanthomonadales	OTU4054	0	0	1	0	0	0	0	3	0	0	0	3	7
d__Bacteria	k__norank_d__Bacteria	p__Planctomycetota	c__unclassified_p__Planctomycetota	o__unclassified_p__Planctomycetota	f__unclassified_p__Planctomycetota	g__unclassified_p__Planctomycetota	s__unclassified_p__Planctomycetota	OTU1836	3	3	7	6	6	1	6	5	7	0	6	2	52
d__Bacteria	k__norank_d__Bacteria	p__Bdellovibrionota	c__Oligoflexia	o__0319-6G20	f__norank_o__0319-6G20	g__norank_f__norank_o__0319-6G20	s__unclassified_g__norank_f__norank_o__0319-6G20	OTU4900	1	0	0	0	0	0	0	0	1	0	0	0	2
d__Bacteria	k__norank_d__Bacteria	p__Elusimicrobiota	c__Elusimicrobia	o__Lineage_IV	f__norank_o__Lineage_IV	g__norank_f__norank_o__Lineage_IV	s__unclassified_g__norank_f__norank_o__Lineage_IV	OTU3731	0	0	0	0	0	0	1	0	0	0	0	0	1
d__Bacteria	k__norank_d__Bacteria	p__Sumerlaeota	c__Sumerlaeia	o__Sumerlaeales	f__Sumerlaeaceae	g__Sumerlaea	s__uncultured_bacterium_g__Sumerlaea	OTU345	0	1	0	0	1	0	0	0	0	0	0	1	3
d__Bacteria	k__norank_d__Bacteria	p__Planctomycetota	c__Phycisphaerae	o__Tepidisphaerales	f__WD2101_soil_group	g__norank_f__WD2101_soil_group	s__unclassified_g__norank_f__WD2101_soil_group	OTU3375	0	0	0	0	2	0	0	1	1	2	0	3	9
d__Bacteria	k__norank_d__Bacteria	p__Proteobacteria	c__Alphaproteobacteria	o__norank_c__Alphaproteobacteria	f__norank_o__norank_c__Alphaproteobacteria	g__norank_f__norank_o__norank_c__Alphaproteobacteria	s__uncultured_Rhodospirillales_bacterium_g__norank_f__norank_o__norank	OTU304	0	0	0	0	1	2	0	1	0	0	0	0	4
d__Bacteria	k__norank_d__Bacteria	p__Planctomycetota	c__Planctomycetes	o__Planctomycetales	f__unclassified_o__Planctomycetales	g__unclassified_o__Planctomycetales	s__unclassified_o__Planctomycetales	OTU4605	9	8	8	3	7	0	4	8	5	2	5	4	63
d__Bacteria	k__norank_d__Bacteria	p__Planctomycetota	c__Planctomycetes	o__Isosphaerales	f__Isosphaeraceae	g__norank_f__Isosphaeraceae	s__unclassified_g__norank_f__Isosphaeraceae	OTU354	1	2	2	1	3	1	1	1	1	3	1	0	17
d__Bacteria	k__norank_d__Bacteria	p__Actinobacteriota	c__Actinobacteria	o__Micromonosporales	f__Micromonosporaceae	g__Phytomonospora	s__unclassified_g__Phytomonospora	OTU607	2	0	1	0	0	0	1	0	1	0	1	0	6
d__Bacteria	k__norank_d__Bacteria	p__Myxococcota	c__Myxococcia	o__Myxococcales	f__Myxococcaceae	g__P3OB-42	s__uncultured_bacterium_g__P3OB-42	OTU4297	0	0	0	0	0	0	2	3	0	0	0	0	5
d__Bacteria	k__norank_d__Bacteria	p__unclassified_k__norank_d__Bacteria	c__unclassified_k__norank_d__Bacteria	o__unclassified_k__norank_d__Bacteria	f__unclassified_k__norank_d__Bacteria	g__unclassified_k__norank_d__Bacteria	s__unclassified_k__norank_d__Bacteria	OTU2567	2	1	1	0	2	2	1	1	3	1	1	0	15
d__Bacteria	k__norank_d__Bacteria	p__Planctomycetota	c__Planctomycetes	o__Gemmatales	f__Gemmataceae	g__norank_f__Gemmataceae	s__uncultured_bacterium_g__norank_f__Gemmataceae	OTU913	0	0	1	0	0	1	0	0	0	0	0	0	2
d__Bacteria	k__norank_d__Bacteria	p__Actinobacteriota	c__Acidimicrobiia	o__Microtrichales	f__unclassified_o__Microtrichales	g__unclassified_o__Microtrichales	s__unclassified_o__Microtrichales	OTU4768	10	15	9	8	9	22	13	7	6	14	8	13	134
d__Bacteria	k__norank_d__Bacteria	p__Planctomycetota	c__Planctomycetes	o__Gemmatales	f__Gemmataceae	g__unclassified_f__Gemmataceae	s__unclassified_f__Gemmataceae	OTU621	0	2	1	0	0	0	0	1	0	0	0	1	5
d__Bacteria	k__norank_d__Bacteria	p__Myxococcota	c__Polyangia	o__Polyangiales	f__Sandaracinaceae	g__norank_f__Sandaracinaceae	s__uncultured_soil_bacterium_g__norank_f__Sandaracinaceae	OTU5135	3	0	0	1	0	0	0	0	0	1	0	0	5
d__Bacteria	k__norank_d__Bacteria	p__Bacteroidota	c__Bacteroidia	o__Chitinophagales	f__Chitinophagaceae	g__Chitinophaga	s__unclassified_g__Chitinophaga	OTU1181	0	4	1	5	3	4	1	2	2	1	5	0	28
d__Bacteria	k__norank_d__Bacteria	p__Gemmatimonadota	c__Gemmatimonadetes	o__Gemmatimonadales	f__Gemmatimonadaceae	g__norank_f__Gemmatimonadaceae	s__unclassified_g__norank_f__Gemmatimonadaceae	OTU3995	0	1	0	0	2	0	1	1	2	0	0	3	10
d__Bacteria	k__norank_d__Bacteria	p__Acidobacteriota	c__Vicinamibacteria	o__Vicinamibacterales	f__Vicinamibacteraceae	g__norank_f__Vicinamibacteraceae	s__unclassified_g__norank_f__Vicinamibacteraceae	OTU968	1	2	2	5	2	4	0	8	2	0	3	5	34
d__Bacteria	k__norank_d__Bacteria	p__Chloroflexi	c__Chloroflexia	o__Chloroflexales	f__Herpetosiphonaceae	g__Herpetosiphon	s__uncultured_bacterium_g__Herpetosiphon	OTU3050	0	0	0	1	1	0	0	0	0	0	0	0	2
d__Bacteria	k__norank_d__Bacteria	p__Firmicutes	c__Bacilli	o__Thermoactinomycetales	f__Thermoactinomycetaceae	g__Risungbinella	s__unclassified_g__Risungbinella	OTU3186	2	0	1	5	1	1	1	3	3	3	0	2	22
d__Bacteria	k__norank_d__Bacteria	p__Halanaerobiaeota	c__Halanaerobiia	o__Halanaerobiales	f__Halobacteroidaceae	g__norank_f__Halobacteroidaceae	s__unclassified_g__norank_f__Halobacteroidaceae	OTU3955	2	4	0	1	2	2	2	1	0	0	0	2	16
d__Bacteria	k__norank_d__Bacteria	p__Myxococcota	c__bacteriap25	o__norank_c__bacteriap25	f__norank_o__norank_c__bacteriap25	g__norank_f__norank_o__norank_c__bacteriap25	s__unclassified_g__norank_f__norank_o__norank_c__bacteriap25	OTU552	0	1	1	0	0	0	3	0	1	0	0	1	7
d__Bacteria	k__norank_d__Bacteria	p__WS2	c__norank_p__WS2	o__norank_c__norank_p__WS2	f__norank_o__norank_c__norank_p__WS2	g__norank_f__norank_o__norank_c__norank_p__WS2	s__unclassified_g__norank_f__norank_o__norank_c__norank_p__WS2	OTU2642	6	7	13	10	8	7	3	7	8	2	12	10	93
d__Bacteria	k__norank_d__Bacteria	p__Planctomycetota	c__Planctomycetes	o__Planctomycetales	f__norank_o__Planctomycetales	g__norank_f__norank_o__Planctomycetales	s__unclassified_g__norank_f__norank_o__Planctomycetales	OTU4789	8	7	6	11	11	5	2	6	7	2	12	8	85
d__Bacteria	k__norank_d__Bacteria	p__Planctomycetota	c__OM190	o__norank_c__OM190	f__norank_o__norank_c__OM190	g__norank_f__norank_o__norank_c__OM190	s__wastewater_metagenome_g__norank_f__norank_o__norank_c__OM190	OTU1230	0	1	2	1	1	0	0	0	0	0	1	0	6
d__Bacteria	k__norank_d__Bacteria	p__Bacteroidota	c__Bacteroidia	o__Chitinophagales	f__Chitinophagaceae	g__Lacibacter	s__Lacibacter_cauensis	OTU2315	0	0	2	1	0	1	0	2	0	0	1	2	9
d__Bacteria	k__norank_d__Bacteria	p__Patescibacteria	c__Saccharimonadia	o__Saccharimonadales	f__norank_o__Saccharimonadales	g__norank_f__norank_o__Saccharimonadales	s__uncultured_bacterium_g__norank_f__norank_o__Saccharimonadales	OTU185	1	0	0	0	0	0	0	0	0	1	0	0	2
d__Bacteria	k__norank_d__Bacteria	p__Actinobacteriota	c__Thermoleophilia	o__Gaiellales	f__Gaiellaceae	g__Gaiella	s__unclassified_g__Gaiella	OTU3704	4	5	2	4	0	3	2	3	6	9	5	4	47
d__Bacteria	k__norank_d__Bacteria	p__Planctomycetota	c__Planctomycetes	o__Gemmatales	f__Gemmataceae	g__Gemmata	s__uncultured_bacterium_g__Gemmata	OTU1930	0	1	1	0	0	0	0	0	0	0	1	1	4
d__Bacteria	k__norank_d__Bacteria	p__Firmicutes	c__Thermacetogenia	o__Thermacetogeniales	f__Thermacetogeniaceae	g__Syntrophaceticus	s__uncultured_bacterium_g__Syntrophaceticus	OTU725	0	0	1	1	0	0	0	1	1	0	2	2	8
d__Bacteria	k__norank_d__Bacteria	p__Myxococcota	c__Myxococcia	o__Myxococcales	f__Myxococcaceae	g__P3OB-42	s__unclassified_g__P3OB-42	OTU5191	0	0	0	1	0	0	0	0	0	3	0	1	5
d__Bacteria	k__norank_d__Bacteria	p__Proteobacteria	c__Alphaproteobacteria	o__Rhizobiales	f__Hyphomicrobiaceae	g__Filomicrobium	s__uncultured_Hyphomicrobiaceae_bacterium_g__Filomicrobium	OTU2018	1	5	1	4	0	3	0	3	1	3	1	1	23
d__Bacteria	k__norank_d__Bacteria	p__Gemmatimonadota	c__Gemmatimonadetes	o__Gemmatimonadales	f__Gemmatimonadaceae	g__norank_f__Gemmatimonadaceae	s__uncultured_Gemmatimonadales_bacterium_g__norank_f__Gemmatimonadaceae	OTU976	17	12	10	28	16	16	16	14	11	6	6	16	168
d__Bacteria	k__norank_d__Bacteria	p__Desulfobacterota	c__norank_p__Desulfobacterota	o__norank_c__norank_p__Desulfobacterota	f__norank_o__norank_c__norank_p__Desulfobacterota	g__norank_f__norank_o__norank_c__norank_p__Desulfobacterota	s__unclassified_g__norank_f__norank_o__norank_c__norank_p__Desulfobacterota	OTU2718	1	3	1	1	0	3	1	0	1	0	0	0	11
d__Bacteria	k__norank_d__Bacteria	p__Latescibacterota	c__norank_p__Latescibacterota	o__norank_c__norank_p__Latescibacterota	f__norank_o__norank_c__norank_p__Latescibacterota	g__norank_f__norank_o__norank_c__norank_p__Latescibacterota	s__unclassified_g__norank_f__norank_o__norank_c__norank_p__Latescibacterota	OTU1435	0	0	2	0	2	0	0	1	0	0	0	1	6
d__Bacteria	k__norank_d__Bacteria	p__Firmicutes	c__Clostridia	o__Peptostreptococcales-Tissierellales	f__norank_o__Peptostreptococcales-Tissierellales	g__Tepidimicrobium	s__uncultured_bacterium_g__Tepidimicrobium	OTU461	1	5	5	5	0	1	1	0	0	2	2	3	25
d__Bacteria	k__norank_d__Bacteria	p__Cyanobacteria	c__Cyanobacteriia	o__Cyanobacteriales	f__Nostocaceae	g__Nostoc_PCC-7107	s__unclassified_g__Nostoc_PCC-7107	OTU39	0	0	0	2	0	0	0	0	0	0	0	0	2
d__Bacteria	k__norank_d__Bacteria	p__Planctomycetota	c__Phycisphaerae	o__Phycisphaerales	f__Phycisphaeraceae	g__AKYG587	s__uncultured_bacterium_g__AKYG587	OTU1990	1	1	0	1	2	1	0	2	1	0	2	1	12
d__Bacteria	k__norank_d__Bacteria	p__Chloroflexi	c__Chloroflexia	o__Thermomicrobiales	f__JG30-KF-CM45	g__norank_f__JG30-KF-CM45	s__uncultured_bacterium_g__norank_f__JG30-KF-CM45	OTU812	18	13	31	26	27	14	22	13	9	22	10	16	221
d__Bacteria	k__norank_d__Bacteria	p__Myxococcota	c__Myxococcia	o__Myxococcales	f__Myxococcaceae	g__P3OB-42	s__uncultured_bacterium_g__P3OB-42	OTU3515	1	7	1	4	4	2	3	4	5	4	3	5	43
d__Bacteria	k__norank_d__Bacteria	p__Planctomycetota	c__Phycisphaerae	o__Phycisphaerales	f__Phycisphaeraceae	g__SM1A02	s__unclassified_g__SM1A02	OTU3105	0	0	0	0	1	0	0	0	0	0	0	0	1
d__Bacteria	k__norank_d__Bacteria	p__Chloroflexi	c__unclassified_p__Chloroflexi	o__unclassified_p__Chloroflexi	f__unclassified_p__Chloroflexi	g__unclassified_p__Chloroflexi	s__unclassified_p__Chloroflexi	OTU2291	1	0	0	0	1	2	1	2	3	1	1	1	13
d__Bacteria	k__norank_d__Bacteria	p__Proteobacteria	c__Gammaproteobacteria	o__Legionellales	f__Legionellaceae	g__Legionella	s__unclassified_g__Legionella	OTU2952	0	0	0	0	1	0	0	0	0	0	0	1	2
d__Bacteria	k__norank_d__Bacteria	p__Chloroflexi	c__Chloroflexia	o__Kallotenuales	f__AKIW781	g__norank_f__AKIW781	s__uncultured_bacterium_g__norank_f__AKIW781	OTU5469	1	1	0	0	1	0	2	1	1	1	0	2	10
d__Bacteria	k__norank_d__Bacteria	p__Firmicutes	c__Symbiobacteriia	o__Symbiobacteriales	f__Symbiobacteraceae	g__unclassified_f__Symbiobacteraceae	s__unclassified_f__Symbiobacteraceae	OTU3551	12	7	2	2	3	4	10	11	10	6	1	5	73
d__Bacteria	k__norank_d__Bacteria	p__Actinobacteriota	c__MB-A2-108	o__norank_c__MB-A2-108	f__norank_o__norank_c__MB-A2-108	g__norank_f__norank_o__norank_c__MB-A2-108	s__unclassified_g__norank_f__norank_o__norank_c__MB-A2-108	OTU1537	0	1	1	0	0	1	0	4	0	0	0	0	7
d__Bacteria	k__norank_d__Bacteria	p__Myxococcota	c__Myxococcia	o__Myxococcales	f__unclassified_o__Myxococcales	g__unclassified_o__Myxococcales	s__unclassified_o__Myxococcales	OTU5169	0	0	0	0	0	1	0	0	0	0	1	1	3
d__Bacteria	k__norank_d__Bacteria	p__Actinobacteriota	c__Actinobacteria	o__Pseudonocardiales	f__Pseudonocardiaceae	g__unclassified_f__Pseudonocardiaceae	s__unclassified_f__Pseudonocardiaceae	OTU3109	0	1	0	0	1	1	0	1	0	1	2	1	8
d__Bacteria	k__norank_d__Bacteria	p__Bacteroidota	c__Bacteroidia	o__Flavobacteriales	f__Flavobacteriaceae	g__Flavobacterium	s__unclassified_g__Flavobacterium	OTU1531	2	3	2	2	1	0	3	1	3	1	3	2	23
d__Bacteria	k__norank_d__Bacteria	p__Myxococcota	c__Polyangia	o__Blfdi19	f__norank_o__Blfdi19	g__norank_f__norank_o__Blfdi19	s__metagenome_g__norank_f__norank_o__Blfdi19	OTU333	0	1	0	0	0	0	0	0	1	0	0	0	2
d__Bacteria	k__norank_d__Bacteria	p__Cyanobacteria	c__Sericytochromatia	o__norank_c__Sericytochromatia	f__norank_o__norank_c__Sericytochromatia	g__norank_f__norank_o__norank_c__Sericytochromatia	s__unclassified_g__norank_f__norank_o__norank_c__Sericytochromatia	OTU4490	1	0	1	2	1	2	1	4	3	0	3	0	18
d__Bacteria	k__norank_d__Bacteria	p__Myxococcota	c__Myxococcia	o__Myxococcales	f__Anaeromyxobacteraceae	g__Anaeromyxobacter	s__unclassified_g__Anaeromyxobacter	OTU2222	0	1	1	1	0	1	0	0	1	0	0	0	5
d__Bacteria	k__norank_d__Bacteria	p__Chloroflexi	c__Anaerolineae	o__Caldilineales	f__Caldilineaceae	g__norank_f__Caldilineaceae	s__uncultured_bacterium_g__norank_f__Caldilineaceae	OTU2678	5	12	2	2	5	4	6	4	3	11	3	6	63
d__Bacteria	k__norank_d__Bacteria	p__Planctomycetota	c__Planctomycetes	o__Gemmatales	f__Gemmataceae	g__unclassified_f__Gemmataceae	s__unclassified_f__Gemmataceae	OTU1938	14	19	23	10	10	9	9	7	10	7	12	17	147
d__Bacteria	k__norank_d__Bacteria	p__Gemmatimonadota	c__Gemmatimonadetes	o__Gemmatimonadales	f__Gemmatimonadaceae	g__norank_f__Gemmatimonadaceae	s__uncultured_Gemmatimonas_sp._g__norank_f__Gemmatimonadaceae	OTU712	1	0	1	0	0	1	0	2	0	0	0	0	5
d__Bacteria	k__norank_d__Bacteria	p__Bdellovibrionota	c__Bdellovibrionia	o__Bdellovibrionales	f__Bdellovibrionaceae	g__OM27_clade	s__unclassified_g__OM27_clade	OTU1996	0	1	0	2	0	0	0	0	0	0	2	1	6
d__Bacteria	k__norank_d__Bacteria	p__Chloroflexi	c__Anaerolineae	o__SBR1031	f__A4b	g__norank_f__A4b	s__uncultured_bacterium_g__norank_f__A4b	OTU2890	25	24	26	24	34	57	17	29	33	12	48	18	347
d__Bacteria	k__norank_d__Bacteria	p__Chloroflexi	c__JG30-KF-CM66	o__norank_c__JG30-KF-CM66	f__norank_o__norank_c__JG30-KF-CM66	g__norank_f__norank_o__norank_c__JG30-KF-CM66	s__uncultured_bacterium_g__norank_f__norank_o__norank_c__JG30-KF-CM66	OTU1564	35	36	38	35	31	27	21	22	22	36	41	27	371
d__Bacteria	k__norank_d__Bacteria	p__Firmicutes	c__Bacilli	o__Paenibacillales	f__Paenibacillaceae	g__Paenibacillus	s__unclassified_g__Paenibacillus	OTU3000	0	0	0	0	2	1	1	0	0	1	0	0	5
d__Bacteria	k__norank_d__Bacteria	p__unclassified_k__norank_d__Bacteria	c__unclassified_k__norank_d__Bacteria	o__unclassified_k__norank_d__Bacteria	f__unclassified_k__norank_d__Bacteria	g__unclassified_k__norank_d__Bacteria	s__unclassified_k__norank_d__Bacteria	OTU498	0	1	0	0	0	0	0	1	0	0	0	0	2
d__Bacteria	k__norank_d__Bacteria	p__Chloroflexi	c__Anaerolineae	o__Anaerolineales	f__Anaerolineaceae	g__norank_f__Anaerolineaceae	s__unclassified_g__norank_f__Anaerolineaceae	OTU1862	2	1	2	0	0	3	1	1	1	0	1	0	12
d__Bacteria	k__norank_d__Bacteria	p__Proteobacteria	c__Alphaproteobacteria	o__Caulobacterales	f__Caulobacteraceae	g__Caulobacter	s__unclassified_g__Caulobacter	OTU2270	1	5	0	1	0	3	1	0	4	2	0	2	19
d__Bacteria	k__norank_d__Bacteria	p__Acidobacteriota	c__Vicinamibacteria	o__Vicinamibacterales	f__Vicinamibacteraceae	g__Luteitalea	s__unclassified_g__Luteitalea	OTU1852	1	2	7	7	5	1	3	5	1	2	1	5	40
d__Bacteria	k__norank_d__Bacteria	p__Desulfobacterota	c__Syntrophobacteria	o__Syntrophobacterales	f__Syntrophobacteraceae	g__Desulfovirga	s__uncultured_delta_proteobacterium_g__Desulfovirga	OTU142	0	0	0	0	0	1	0	0	0	0	0	0	1
d__Bacteria	k__norank_d__Bacteria	p__Acidobacteriota	c__Vicinamibacteria	o__Vicinamibacterales	f__norank_o__Vicinamibacterales	g__norank_f__norank_o__Vicinamibacterales	s__unclassified_g__norank_f__norank_o__Vicinamibacterales	OTU2712	2	4	4	5	2	2	0	4	7	1	2	4	37
d__Bacteria	k__norank_d__Bacteria	p__Proteobacteria	c__Alphaproteobacteria	o__Kiloniellales	f__Kiloniellaceae	g__Pelagibius	s__unclassified_g__Pelagibius	OTU538	6	6	5	8	4	4	4	3	0	5	6	9	60
d__Bacteria	k__norank_d__Bacteria	p__Firmicutes	c__Limnochordia	o__MBA03	f__norank_o__MBA03	g__norank_f__norank_o__MBA03	s__uncultured_prokaryote_g__norank_f__norank_o__MBA03	OTU2361	0	0	0	1	1	1	1	0	1	0	1	0	6
d__Bacteria	k__norank_d__Bacteria	p__Planctomycetota	c__Planctomycetes	o__Isosphaerales	f__Isosphaeraceae	g__Singulisphaera	s__metagenome_g__Singulisphaera	OTU139	1	2	0	0	0	0	0	1	0	1	1	0	6
d__Bacteria	k__norank_d__Bacteria	p__Actinobacteriota	c__Acidimicrobiia	o__Actinomarinales	f__norank_o__Actinomarinales	g__norank_f__norank_o__Actinomarinales	s__unclassified_g__norank_f__norank_o__Actinomarinales	OTU410	4	3	3	3	5	6	5	5	2	5	7	3	51
d__Bacteria	k__norank_d__Bacteria	p__Actinobacteriota	c__Acidimicrobiia	o__Actinomarinales	f__norank_o__Actinomarinales	g__norank_f__norank_o__Actinomarinales	s__unclassified_g__norank_f__norank_o__Actinomarinales	OTU418	214	276	222	217	334	273	239	195	238	295	253	243	2999
d__Bacteria	k__norank_d__Bacteria	p__Actinobacteriota	c__Actinobacteria	o__Frankiales	f__Sporichthyaceae	g__Sporichthya	s__unclassified_g__Sporichthya	OTU1437	1	1	0	0	0	1	0	0	1	1	0	0	5
d__Bacteria	k__norank_d__Bacteria	p__Gemmatimonadota	c__Gemmatimonadetes	o__Gemmatimonadales	f__Gemmatimonadaceae	g__norank_f__Gemmatimonadaceae	s__unclassified_g__norank_f__Gemmatimonadaceae	OTU840	0	0	2	2	0	0	0	0	2	0	0	0	6
d__Bacteria	k__norank_d__Bacteria	p__Bacteroidota	c__Bacteroidia	o__Cytophagales	f__Cytophagaceae	g__Sporocytophaga	s__uncultured_bacterium_g__Sporocytophaga	OTU3258	1	1	1	0	0	0	1	0	1	2	0	1	8
d__Bacteria	k__norank_d__Bacteria	p__Acidobacteriota	c__Thermoanaerobaculia	o__Thermoanaerobaculales	f__Thermoanaerobaculaceae	g__Subgroup_10	s__unclassified_g__Subgroup_10	OTU3432	1	11	6	7	18	6	7	3	14	12	13	10	108
d__Bacteria	k__norank_d__Bacteria	p__Dependentiae	c__Babeliae	o__Babeliales	f__Vermiphilaceae	g__norank_f__Vermiphilaceae	s__unclassified_g__norank_f__Vermiphilaceae	OTU2787	0	1	0	0	0	1	0	0	0	1	0	1	4
d__Bacteria	k__norank_d__Bacteria	p__Actinobacteriota	c__Actinobacteria	o__Micrococcales	f__Micrococcaceae	g__unclassified_f__Micrococcaceae	s__unclassified_f__Micrococcaceae	OTU3027	0	0	0	0	1	0	0	0	0	0	0	0	1
d__Bacteria	k__norank_d__Bacteria	p__Proteobacteria	c__Alphaproteobacteria	o__Rhizobiales	f__D05-2	g__norank_f__D05-2	s__uncultured_bacterium_g__norank_f__D05-2	OTU296	1	0	0	0	0	0	0	0	0	0	0	0	1
d__Bacteria	k__norank_d__Bacteria	p__Firmicutes	c__Bacilli	o__Haloplasmatales	f__Haloplasmataceae	g__Haloplasma	s__unclassified_g__Haloplasma	OTU4463	2	2	0	1	1	1	1	0	0	2	0	1	11
d__Bacteria	k__norank_d__Bacteria	p__Chloroflexi	c__Anaerolineae	o__SBR1031	f__norank_o__SBR1031	g__norank_f__norank_o__SBR1031	s__unclassified_g__norank_f__norank_o__SBR1031	OTU2501	0	1	1	0	0	0	0	2	0	0	0	0	4
d__Bacteria	k__norank_d__Bacteria	p__Bacteroidota	c__Bacteroidia	o__Sphingobacteriales	f__AKYH767	g__norank_f__AKYH767	s__unclassified_g__norank_f__AKYH767	OTU3086	0	0	0	0	1	0	0	0	0	0	0	0	1
d__Bacteria	k__norank_d__Bacteria	p__Firmicutes	c__Limnochordia	o__Limnochordales	f__Limnochordaceae	g__norank_f__Limnochordaceae	s__uncultured_compost_bacterium_g__norank_f__Limnochordaceae	OTU1178	0	1	1	0	0	2	1	1	0	1	1	0	8
d__Bacteria	k__norank_d__Bacteria	p__Proteobacteria	c__Alphaproteobacteria	o__Acetobacterales	f__Acetobacteraceae	g__Roseomonas	s__metagenome_g__Roseomonas	OTU1660	1	2	1	3	0	0	0	0	0	1	0	0	8
d__Bacteria	k__norank_d__Bacteria	p__Acidobacteriota	c__Vicinamibacteria	o__Subgroup_17	f__norank_o__Subgroup_17	g__norank_f__norank_o__Subgroup_17	s__uncultured_soil_bacterium_g__norank_f__norank_o__Subgroup_17	OTU1173	0	0	1	0	1	0	0	0	0	0	0	1	3
d__Bacteria	k__norank_d__Bacteria	p__Proteobacteria	c__Alphaproteobacteria	o__Tistrellales	f__Geminicoccaceae	g__norank_f__Geminicoccaceae	s__unclassified_g__norank_f__Geminicoccaceae	OTU5212	1	1	3	3	3	7	4	1	3	4	3	2	35
d__Bacteria	k__norank_d__Bacteria	p__Chloroflexi	c__Anaerolineae	o__Anaerolineales	f__Anaerolineaceae	g__UTCFX1	s__uncultured_bacterium_g__UTCFX1	OTU1367	0	1	4	1	5	3	0	0	3	0	3	4	24
d__Bacteria	k__norank_d__Bacteria	p__Gemmatimonadota	c__Gemmatimonadetes	o__Gemmatimonadales	f__Gemmatimonadaceae	g__norank_f__Gemmatimonadaceae	s__unclassified_g__norank_f__Gemmatimonadaceae	OTU1906	0	1	1	3	0	1	3	0	0	0	0	1	10
d__Bacteria	k__norank_d__Bacteria	p__Bdellovibrionota	c__Bdellovibrionia	o__Bdellovibrionales	f__Bdellovibrionaceae	g__Bdellovibrio	s__uncultured_bacterium_g__Bdellovibrio	OTU3340	0	0	0	0	1	0	0	0	0	2	0	0	3
d__Bacteria	k__norank_d__Bacteria	p__Planctomycetota	c__Planctomycetes	o__Gemmatales	f__Gemmataceae	g__norank_f__Gemmataceae	s__uncultured_bacterium_g__norank_f__Gemmataceae	OTU3429	0	1	0	1	0	0	3	1	0	1	0	2	9
d__Bacteria	k__norank_d__Bacteria	p__Proteobacteria	c__Alphaproteobacteria	o__Elsterales	f__norank_o__Elsterales	g__norank_f__norank_o__Elsterales	s__unclassified_g__norank_f__norank_o__Elsterales	OTU3987	0	2	0	1	0	1	1	2	3	0	0	2	12
d__Bacteria	k__norank_d__Bacteria	p__Planctomycetota	c__OM190	o__norank_c__OM190	f__norank_o__norank_c__OM190	g__norank_f__norank_o__norank_c__OM190	s__unclassified_g__norank_f__norank_o__norank_c__OM190	OTU1099	1	0	1	0	1	0	2	1	3	1	0	1	11
d__Bacteria	k__norank_d__Bacteria	p__Actinobacteriota	c__Acidimicrobiia	o__Microtrichales	f__norank_o__Microtrichales	g__norank_f__norank_o__Microtrichales	s__unclassified_g__norank_f__norank_o__Microtrichales	OTU4560	3	5	2	5	1	4	3	4	4	1	3	4	39
d__Bacteria	k__norank_d__Bacteria	p__Myxococcota	c__bacteriap25	o__norank_c__bacteriap25	f__norank_o__norank_c__bacteriap25	g__norank_f__norank_o__norank_c__bacteriap25	s__unclassified_g__norank_f__norank_o__norank_c__bacteriap25	OTU802	1	1	1	0	0	2	0	0	1	1	0	2	9
d__Bacteria	k__norank_d__Bacteria	p__Patescibacteria	c__Parcubacteria	o__unclassified_c__Parcubacteria	f__unclassified_c__Parcubacteria	g__unclassified_c__Parcubacteria	s__unclassified_c__Parcubacteria	OTU31	0	0	0	0	0	0	0	0	0	0	0	1	1
d__Bacteria	k__norank_d__Bacteria	p__unclassified_k__norank_d__Bacteria	c__unclassified_k__norank_d__Bacteria	o__unclassified_k__norank_d__Bacteria	f__unclassified_k__norank_d__Bacteria	g__unclassified_k__norank_d__Bacteria	s__unclassified_k__norank_d__Bacteria	OTU4909	0	0	0	0	0	0	0	0	2	0	0	0	2
d__Bacteria	k__norank_d__Bacteria	p__Chloroflexi	c__Anaerolineae	o__Caldilineales	f__Caldilineaceae	g__Litorilinea	s__uncultured_bacterium_g__Litorilinea	OTU3591	3	5	2	1	4	2	2	1	0	3	0	0	23
d__Bacteria	k__norank_d__Bacteria	p__Firmicutes	c__Symbiobacteriia	o__Symbiobacteriales	f__Symbiobacteraceae	g__norank_f__Symbiobacteraceae	s__uncultured_soil_bacterium_g__norank_f__Symbiobacteraceae	OTU3909	2	1	0	1	0	1	6	6	2	2	2	4	27
d__Bacteria	k__norank_d__Bacteria	p__Chloroflexi	c__TK10	o__norank_c__TK10	f__norank_o__norank_c__TK10	g__norank_f__norank_o__norank_c__TK10	s__unclassified_g__norank_f__norank_o__norank_c__TK10	OTU2917	0	0	1	1	0	1	1	3	5	1	2	3	18
d__Bacteria	k__norank_d__Bacteria	p__Firmicutes	c__Bacilli	o__Aneurinibacillales	f__Aneurinibacillaceae	g__Aneurinibacillus	s__uncultured_bacterium_g__Aneurinibacillus	OTU3380	3	11	3	4	2	1	9	2	3	6	1	2	47
d__Bacteria	k__norank_d__Bacteria	p__Planctomycetota	c__Planctomycetes	o__Gemmatales	f__Gemmataceae	g__Gemmata	s__unclassified_g__Gemmata	OTU2401	0	0	0	1	0	0	0	0	1	0	0	0	2
d__Bacteria	k__norank_d__Bacteria	p__Actinobacteriota	c__Actinobacteria	o__Micromonosporales	f__Micromonosporaceae	g__Longispora	s__uncultured_bacterium_g__Longispora	OTU3525	3	5	0	1	3	7	6	8	4	5	9	2	53
d__Bacteria	k__norank_d__Bacteria	p__Bacteroidota	c__Bacteroidia	o__Cytophagales	f__Microscillaceae	g__norank_f__Microscillaceae	s__uncultured_soil_bacterium_g__norank_f__Microscillaceae	OTU2265	2	1	2	5	2	6	0	1	4	4	1	1	29
d__Bacteria	k__norank_d__Bacteria	p__Firmicutes	c__Bacilli	o__Bacillales	f__Sporolactobacillaceae	g__Tuberibacillus	s__Caenibacillus_caldisaponilyticus	OTU2979	1	0	0	2	3	0	2	0	0	1	2	1	12
d__Bacteria	k__norank_d__Bacteria	p__Bacteroidota	c__Bacteroidia	o__Cytophagales	f__Microscillaceae	g__Ohtaekwangia	s__unclassified_g__Ohtaekwangia	OTU4981	0	0	1	2	3	5	0	1	2	1	1	0	16
d__Bacteria	k__norank_d__Bacteria	p__unclassified_k__norank_d__Bacteria	c__unclassified_k__norank_d__Bacteria	o__unclassified_k__norank_d__Bacteria	f__unclassified_k__norank_d__Bacteria	g__unclassified_k__norank_d__Bacteria	s__unclassified_k__norank_d__Bacteria	OTU5194	0	0	0	0	0	0	0	0	0	1	1	0	2
d__Bacteria	k__norank_d__Bacteria	p__Actinobacteriota	c__Actinobacteria	o__Propionibacteriales	f__Nocardioidaceae	g__unclassified_f__Nocardioidaceae	s__unclassified_f__Nocardioidaceae	OTU2885	9	2	4	6	3	10	2	3	2	3	5	3	52
d__Bacteria	k__norank_d__Bacteria	p__Actinobacteriota	c__Actinobacteria	o__Propionibacteriales	f__Propionibacteriaceae	g__unclassified_f__Propionibacteriaceae	s__unclassified_f__Propionibacteriaceae	OTU2011	0	0	0	2	0	0	0	0	0	2	0	0	4
d__Bacteria	k__norank_d__Bacteria	p__Firmicutes	c__Bacilli	o__Alicyclobacillales	f__Alicyclobacillaceae	g__Tumebacillus	s__unclassified_g__Tumebacillus	OTU2947	0	0	0	0	1	0	0	0	0	2	0	0	3
d__Bacteria	k__norank_d__Bacteria	p__Patescibacteria	c__Saccharimonadia	o__Saccharimonadales	f__unclassified_o__Saccharimonadales	g__unclassified_o__Saccharimonadales	s__unclassified_o__Saccharimonadales	OTU1428	0	0	1	3	2	3	0	1	0	0	0	1	11
d__Bacteria	k__norank_d__Bacteria	p__Myxococcota	c__bacteriap25	o__norank_c__bacteriap25	f__norank_o__norank_c__bacteriap25	g__norank_f__norank_o__norank_c__bacteriap25	s__unclassified_g__norank_f__norank_o__norank_c__bacteriap25	OTU5205	0	0	0	0	0	1	0	1	1	3	0	3	9
d__Bacteria	k__norank_d__Bacteria	p__Myxococcota	c__Polyangia	o__Nannocystales	f__Nannocystaceae	g__Nannocystis	s__unclassified_g__Nannocystis	OTU4072	6	4	7	7	14	9	7	4	9	3	2	5	77
d__Bacteria	k__norank_d__Bacteria	p__Chloroflexi	c__Anaerolineae	o__Caldilineales	f__Caldilineaceae	g__Litorilinea	s__uncultured_bacterium_g__Litorilinea	OTU684	4	2	0	2	2	4	2	1	0	1	0	1	19
d__Bacteria	k__norank_d__Bacteria	p__Actinobacteriota	c__Actinobacteria	o__Euzebyales	f__Euzebyaceae	g__norank_f__Euzebyaceae	s__uncultured_Actinomycetales_bacterium_g__norank_f__Euzebyaceae	OTU2691	0	1	0	1	3	0	0	4	1	1	0	1	12
d__Bacteria	k__norank_d__Bacteria	p__Acidobacteriota	c__Blastocatellia	o__Pyrinomonadales	f__Pyrinomonadaceae	g__RB41	s__uncultured_soil_bacterium_g__RB41	OTU4769	118	84	139	138	143	101	89	134	143	45	64	110	1308
d__Bacteria	k__norank_d__Bacteria	p__Proteobacteria	c__Gammaproteobacteria	o__Cellvibrionales	f__Cellvibrionaceae	g__unclassified_f__Cellvibrionaceae	s__unclassified_f__Cellvibrionaceae	OTU525	0	0	1	0	1	1	0	0	0	0	0	0	3
d__Bacteria	k__norank_d__Bacteria	p__unclassified_k__norank_d__Bacteria	c__unclassified_k__norank_d__Bacteria	o__unclassified_k__norank_d__Bacteria	f__unclassified_k__norank_d__Bacteria	g__unclassified_k__norank_d__Bacteria	s__unclassified_k__norank_d__Bacteria	OTU5378	0	0	0	0	0	0	0	1	0	0	1	0	2
d__Bacteria	k__norank_d__Bacteria	p__Planctomycetota	c__Planctomycetes	o__Planctomycetales	f__Rubinisphaeraceae	g__SH-PL14	s__uncultured_bacterium_g__SH-PL14	OTU2230	2	3	1	4	2	1	0	2	1	0	0	6	22
d__Bacteria	k__norank_d__Bacteria	p__Actinobacteriota	c__Thermoleophilia	o__Gaiellales	f__Gaiellaceae	g__Gaiella	s__unclassified_g__Gaiella	OTU1683	5	15	10	9	10	15	11	13	10	17	10	9	134
d__Bacteria	k__norank_d__Bacteria	p__Verrucomicrobiota	c__Chlamydiae	o__Chlamydiales	f__Chlamydiaceae	g__unclassified_f__Chlamydiaceae	s__unclassified_f__Chlamydiaceae	OTU2466	3	0	0	0	0	0	0	1	0	0	0	1	5
d__Bacteria	k__norank_d__Bacteria	p__Chloroflexi	c__KD4-96	o__norank_c__KD4-96	f__norank_o__norank_c__KD4-96	g__norank_f__norank_o__norank_c__KD4-96	s__unclassified_g__norank_f__norank_o__norank_c__KD4-96	OTU1789	23	14	22	19	11	15	18	30	31	12	17	24	236
d__Bacteria	k__norank_d__Bacteria	p__Proteobacteria	c__Gammaproteobacteria	o__Diplorickettsiales	f__Diplorickettsiaceae	g__norank_f__Diplorickettsiaceae	s__unclassified_g__norank_f__Diplorickettsiaceae	OTU2299	0	0	0	2	0	1	0	0	4	2	1	2	12
d__Bacteria	k__norank_d__Bacteria	p__Proteobacteria	c__Gammaproteobacteria	o__Burkholderiales	f__Comamonadaceae	g__unclassified_f__Comamonadaceae	s__unclassified_f__Comamonadaceae	OTU1292	10	16	11	11	12	10	19	16	22	16	12	22	177
d__Bacteria	k__norank_d__Bacteria	p__Planctomycetota	c__Planctomycetes	o__norank_c__Planctomycetes	f__norank_o__norank_c__Planctomycetes	g__norank_f__norank_o__norank_c__Planctomycetes	s__uncultured_bacterium_g__norank_f__norank_o__norank_c__Planctomycetes	OTU3336	1	0	1	0	0	0	1	0	0	0	0	0	3
d__Bacteria	k__norank_d__Bacteria	p__Chloroflexi	c__TK10	o__norank_c__TK10	f__norank_o__norank_c__TK10	g__norank_f__norank_o__norank_c__TK10	s__unclassified_g__norank_f__norank_o__norank_c__TK10	OTU2316	1	1	0	1	0	1	0	0	1	0	0	0	5
d__Bacteria	k__norank_d__Bacteria	p__Proteobacteria	c__Gammaproteobacteria	o__Burkholderiales	f__Nitrosomonadaceae	g__MND1	s__uncultured_beta_proteobacterium_g__MND1	OTU2212	1	2	1	3	0	1	0	0	0	0	1	1	10
d__Bacteria	k__norank_d__Bacteria	p__Chloroflexi	c__unclassified_p__Chloroflexi	o__unclassified_p__Chloroflexi	f__unclassified_p__Chloroflexi	g__unclassified_p__Chloroflexi	s__unclassified_p__Chloroflexi	OTU2194	0	0	1	0	2	4	0	0	0	1	1	0	9
d__Bacteria	k__norank_d__Bacteria	p__Planctomycetota	c__Planctomycetes	o__Pirellulales	f__Pirellulaceae	g__norank_f__Pirellulaceae	s__metagenome_g__norank_f__Pirellulaceae	OTU530	0	1	0	2	0	1	0	1	1	1	1	0	8
d__Bacteria	k__norank_d__Bacteria	p__Planctomycetota	c__Planctomycetes	o__Planctomycetales	f__norank_o__Planctomycetales	g__norank_f__norank_o__Planctomycetales	s__unclassified_g__norank_f__norank_o__Planctomycetales	OTU161	0	1	2	1	0	0	0	2	0	0	0	1	7
d__Bacteria	k__norank_d__Bacteria	p__Bacteroidota	c__Bacteroidia	o__Chitinophagales	f__Chitinophagaceae	g__Puia	s__uncultured_soil_bacterium_g__Puia	OTU4222	3	6	4	7	7	9	7	5	4	3	9	3	67
d__Bacteria	k__norank_d__Bacteria	p__Proteobacteria	c__Gammaproteobacteria	o__Coxiellales	f__Coxiellaceae	g__Coxiella	s__unclassified_g__Coxiella	OTU4046	0	0	0	1	0	0	1	0	0	1	0	0	3
d__Bacteria	k__norank_d__Bacteria	p__Planctomycetota	c__unclassified_p__Planctomycetota	o__unclassified_p__Planctomycetota	f__unclassified_p__Planctomycetota	g__unclassified_p__Planctomycetota	s__unclassified_p__Planctomycetota	OTU1786	0	0	2	0	0	0	0	0	0	0	0	1	3
d__Bacteria	k__norank_d__Bacteria	p__Firmicutes	c__Clostridia	o__Peptostreptococcales-Tissierellales	f__norank_o__Peptostreptococcales-Tissierellales	g__unclassified_f__norank_o__Peptostreptococcales-Tissierellales	s__unclassified_f__norank_o__Peptostreptococcales-Tissierellales	OTU1498	0	0	0	0	0	0	1	1	0	0	1	0	3
d__Bacteria	k__norank_d__Bacteria	p__Proteobacteria	c__Gammaproteobacteria	o__Diplorickettsiales	f__Diplorickettsiaceae	g__Aquicella	s__uncultured_bacterium_g__Aquicella	OTU2033	0	3	0	3	0	1	2	1	0	1	1	0	12
d__Bacteria	k__norank_d__Bacteria	p__Firmicutes	c__Clostridia	o__Eubacteriales	f__Garciellaceae	g__Irregularibacter	s__uncultured_bacterium_g__Irregularibacter	OTU3245	2	1	0	2	3	0	1	1	1	2	2	0	15
d__Bacteria	k__norank_d__Bacteria	p__Patescibacteria	c__Saccharimonadia	o__Saccharimonadales	f__norank_o__Saccharimonadales	g__norank_f__norank_o__Saccharimonadales	s__uncultured_Candidatus_Saccharibacteria_bacterium_g__norank_f__norank	OTU5134	0	0	0	1	0	0	0	0	0	1	1	0	3
d__Bacteria	k__norank_d__Bacteria	p__Bacteroidota	c__Bacteroidia	o__Cytophagales	f__Cyclobacteriaceae	g__norank_f__Cyclobacteriaceae	s__uncultured_Bacteroidetes_bacterium_g__norank_f__Cyclobacteriaceae	OTU2770	6	9	3	5	3	5	5	6	4	4	7	7	64
d__Bacteria	k__norank_d__Bacteria	p__unclassified_k__norank_d__Bacteria	c__unclassified_k__norank_d__Bacteria	o__unclassified_k__norank_d__Bacteria	f__unclassified_k__norank_d__Bacteria	g__unclassified_k__norank_d__Bacteria	s__unclassified_k__norank_d__Bacteria	OTU3903	11	3	6	3	4	3	10	3	11	4	2	3	63
d__Bacteria	k__norank_d__Bacteria	p__Planctomycetota	c__OM190	o__norank_c__OM190	f__norank_o__norank_c__OM190	g__norank_f__norank_o__norank_c__OM190	s__unclassified_g__norank_f__norank_o__norank_c__OM190	OTU3637	1	2	3	1	1	0	2	4	4	1	1	7	27
d__Bacteria	k__norank_d__Bacteria	p__Myxococcota	c__Polyangia	o__Haliangiales	f__Haliangiaceae	g__Haliangium	s__unclassified_g__Haliangium	OTU123	0	1	0	0	0	0	0	0	0	1	0	0	2
d__Bacteria	k__norank_d__Bacteria	p__Firmicutes	c__Clostridia	o__unclassified_c__Clostridia	f__unclassified_c__Clostridia	g__unclassified_c__Clostridia	s__unclassified_c__Clostridia	OTU5278	1	1	1	0	1	5	0	2	0	4	0	3	18
d__Bacteria	k__norank_d__Bacteria	p__Actinobacteriota	c__MB-A2-108	o__norank_c__MB-A2-108	f__norank_o__norank_c__MB-A2-108	g__norank_f__norank_o__norank_c__MB-A2-108	s__uncultured_actinobacterium_g__norank_f__norank_o__norank_c__MB-A2-108	OTU4167	30	23	43	38	29	28	30	50	39	14	27	30	381
d__Bacteria	k__norank_d__Bacteria	p__Patescibacteria	c__Microgenomatia	o__Candidatus_Woesebacteria	f__norank_o__Candidatus_Woesebacteria	g__norank_f__norank_o__Candidatus_Woesebacteria	s__uncultured_bacterium_g__norank_f__norank_o__Candidatus_Woesebacteria	OTU138	0	1	1	0	0	0	0	0	1	0	1	1	5
d__Bacteria	k__norank_d__Bacteria	p__Dependentiae	c__Babeliae	o__Babeliales	f__Vermiphilaceae	g__norank_f__Vermiphilaceae	s__uncultured_bacterium_g__norank_f__Vermiphilaceae	OTU1087	0	0	1	0	1	0	0	0	0	0	0	0	2
d__Bacteria	k__norank_d__Bacteria	p__Patescibacteria	c__Saccharimonadia	o__Saccharimonadales	f__Saccharimonadaceae	g__TM7a	s__uncultured_bacterium_g__TM7a	OTU594	6	10	9	7	3	7	0	1	0	2	1	1	47
d__Bacteria	k__norank_d__Bacteria	p__Planctomycetota	c__Planctomycetes	o__Gemmatales	f__Gemmataceae	g__norank_f__Gemmataceae	s__uncultured_bacterium_g__norank_f__Gemmataceae	OTU1447	0	0	1	0	0	0	0	2	0	0	0	1	4
d__Bacteria	k__norank_d__Bacteria	p__Verrucomicrobiota	c__Verrucomicrobiae	o__Pedosphaerales	f__Pedosphaeraceae	g__unclassified_f__Pedosphaeraceae	s__unclassified_f__Pedosphaeraceae	OTU3386	0	1	0	0	0	0	1	0	1	0	0	0	3
d__Bacteria	k__norank_d__Bacteria	p__Myxococcota	c__Polyangia	o__Haliangiales	f__Haliangiaceae	g__Haliangium	s__uncultured_bacterium_g__Haliangium	OTU4881	0	0	0	1	1	1	1	0	1	0	0	1	6
d__Bacteria	k__norank_d__Bacteria	p__Chloroflexi	c__Gitt-GS-136	o__norank_c__Gitt-GS-136	f__norank_o__norank_c__Gitt-GS-136	g__norank_f__norank_o__norank_c__Gitt-GS-136	s__uncultured_bacterium_g__norank_f__norank_o__norank_c__Gitt-GS-136	OTU3569	85	65	84	85	65	64	54	111	78	41	54	73	859
d__Bacteria	k__norank_d__Bacteria	p__Proteobacteria	c__Gammaproteobacteria	o__PLTA13	f__norank_o__PLTA13	g__norank_f__norank_o__PLTA13	s__uncultured_soil_bacterium_g__norank_f__norank_o__PLTA13	OTU4027	2	1	0	2	2	0	2	0	3	2	0	2	16
d__Bacteria	k__norank_d__Bacteria	p__Planctomycetota	c__Planctomycetes	o__Pirellulales	f__Pirellulaceae	g__Pirellula	s__unclassified_g__Pirellula	OTU2343	2	0	0	0	0	0	0	0	1	0	0	0	3
d__Bacteria	k__norank_d__Bacteria	p__Dependentiae	c__Babeliae	o__Babeliales	f__unclassified_o__Babeliales	g__unclassified_o__Babeliales	s__unclassified_o__Babeliales	OTU358	0	1	0	0	0	1	0	0	1	0	0	1	4
d__Bacteria	k__norank_d__Bacteria	p__Actinobacteriota	c__Acidimicrobiia	o__Microtrichales	f__norank_o__Microtrichales	g__norank_f__norank_o__Microtrichales	s__unclassified_g__norank_f__norank_o__Microtrichales	OTU4790	9	14	12	12	6	7	11	2	13	10	13	7	116
d__Bacteria	k__norank_d__Bacteria	p__Myxococcota	c__Polyangia	o__Haliangiales	f__Haliangiaceae	g__Haliangium	s__unclassified_g__Haliangium	OTU1316	2	1	2	0	2	1	0	1	0	0	1	0	10
d__Bacteria	k__norank_d__Bacteria	p__Zixibacteria	c__norank_p__Zixibacteria	o__norank_c__norank_p__Zixibacteria	f__norank_o__norank_c__norank_p__Zixibacteria	g__norank_f__norank_o__norank_c__norank_p__Zixibacteria	s__uncultured_bacterium_g__norank_f__norank_o__norank_c__norank_p__Zixibacteria	OTU3703	1	1	1	0	0	1	2	0	1	1	2	1	11
d__Bacteria	k__norank_d__Bacteria	p__Elusimicrobiota	c__Elusimicrobia	o__MVP-88	f__norank_o__MVP-88	g__norank_f__norank_o__MVP-88	s__uncultured_bacterium_g__norank_f__norank_o__MVP-88	OTU1000	0	0	1	1	0	0	0	0	0	0	0	0	2
d__Bacteria	k__norank_d__Bacteria	p__Actinobacteriota	c__MB-A2-108	o__norank_c__MB-A2-108	f__norank_o__norank_c__MB-A2-108	g__norank_f__norank_o__norank_c__MB-A2-108	s__uncultured_bacterium_g__norank_f__norank_o__norank_c__MB-A2-108	OTU2538	0	1	0	0	3	0	1	0	1	0	0	2	8
d__Bacteria	k__norank_d__Bacteria	p__Actinobacteriota	c__Actinobacteria	o__Micrococcales	f__unclassified_o__Micrococcales	g__unclassified_o__Micrococcales	s__unclassified_o__Micrococcales	OTU1925	5	6	10	14	4	8	5	0	3	3	4	3	65
d__Bacteria	k__norank_d__Bacteria	p__Proteobacteria	c__Gammaproteobacteria	o__unclassified_c__Gammaproteobacteria	f__unclassified_c__Gammaproteobacteria	g__unclassified_c__Gammaproteobacteria	s__unclassified_c__Gammaproteobacteria	OTU160	0	1	0	0	0	0	0	0	0	0	0	0	1
d__Bacteria	k__norank_d__Bacteria	p__Chloroflexi	c__Anaerolineae	o__SBR1031	f__norank_o__SBR1031	g__norank_f__norank_o__SBR1031	s__metagenome_g__norank_f__norank_o__SBR1031	OTU258	5	4	2	2	3	4	3	2	3	3	4	3	38
d__Bacteria	k__norank_d__Bacteria	p__Chloroflexi	c__Chloroflexia	o__Chloroflexales	f__Chloroflexaceae	g__Candidatus_Chloroploca	s__compost_metagenome_g__Candidatus_Chloroploca	OTU3801	0	0	1	1	0	0	2	0	1	1	1	1	8
d__Bacteria	k__norank_d__Bacteria	p__Myxococcota	c__Polyangia	o__Polyangiales	f__Sandaracinaceae	g__unclassified_f__Sandaracinaceae	s__unclassified_f__Sandaracinaceae	OTU3821	2	0	0	0	2	1	1	1	0	1	0	2	10
d__Bacteria	k__norank_d__Bacteria	p__Acidobacteriota	c__Vicinamibacteria	o__Subgroup_17	f__norank_o__Subgroup_17	g__norank_f__norank_o__Subgroup_17	s__unclassified_g__norank_f__norank_o__Subgroup_17	OTU2494	0	2	0	0	2	0	0	0	1	0	1	0	6
d__Bacteria	k__norank_d__Bacteria	p__Bacteroidota	c__Bacteroidia	o__Cytophagales	f__Cyclobacteriaceae	g__norank_f__Cyclobacteriaceae	s__Rhodonellum_psychrophilum	OTU2038	0	0	1	2	2	1	0	0	0	0	0	0	6
d__Bacteria	k__norank_d__Bacteria	p__Firmicutes	c__Clostridia	o__Lachnospirales	f__Defluviitaleaceae	g__Defluviitalea	s__unclassified_g__Defluviitalea	OTU2587	1	1	0	0	1	1	2	0	0	1	0	0	7
d__Bacteria	k__norank_d__Bacteria	p__Chloroflexi	c__Gitt-GS-136	o__norank_c__Gitt-GS-136	f__norank_o__norank_c__Gitt-GS-136	g__norank_f__norank_o__norank_c__Gitt-GS-136	s__uncultured_bacterium_g__norank_f__norank_o__norank_c__Gitt-GS-136	OTU1709	13	6	8	16	14	12	1	6	5	7	5	7	100
d__Bacteria	k__norank_d__Bacteria	p__Proteobacteria	c__Gammaproteobacteria	o__Diplorickettsiales	f__Diplorickettsiaceae	g__Aquicella	s__unclassified_g__Aquicella	OTU334	0	0	1	0	0	1	0	0	2	0	0	0	4
d__Bacteria	k__norank_d__Bacteria	p__Chloroflexi	c__Dehalococcoidia	o__S085	f__norank_o__S085	g__norank_f__norank_o__S085	s__uncultured_bacterium_g__norank_f__norank_o__S085	OTU921	8	10	11	9	7	8	5	6	4	7	6	5	86
d__Bacteria	k__norank_d__Bacteria	p__Planctomycetota	c__Planctomycetes	o__Gemmatales	f__Gemmataceae	g__norank_f__Gemmataceae	s__unclassified_g__norank_f__Gemmataceae	OTU2930	1	0	0	2	2	1	0	2	1	0	0	0	9
d__Bacteria	k__norank_d__Bacteria	p__Firmicutes	c__Clostridia	o__Clostridiales	f__Caloramatoraceae	g__Fonticella	s__unclassified_g__Fonticella	OTU779	0	0	1	1	1	0	0	0	1	0	2	0	6
d__Bacteria	k__norank_d__Bacteria	p__Planctomycetota	c__OM190	o__norank_c__OM190	f__norank_o__norank_c__OM190	g__norank_f__norank_o__norank_c__OM190	s__uncultured_bacterium_g__norank_f__norank_o__norank_c__OM190	OTU4797	0	0	1	1	0	1	0	3	1	1	0	1	9
d__Bacteria	k__norank_d__Bacteria	p__Firmicutes	c__Bacilli	o__Bacillales	f__Bacillaceae	g__unclassified_f__Bacillaceae	s__unclassified_f__Bacillaceae	OTU5034	0	0	0	0	0	1	0	0	0	1	0	0	2
d__Bacteria	k__norank_d__Bacteria	p__Acidobacteriota	c__Acidobacteriae	o__Subgroup_15	f__norank_o__Subgroup_15	g__norank_f__norank_o__Subgroup_15	s__uncultured_bacterium_g__norank_f__norank_o__Subgroup_15	OTU2872	2	2	3	0	2	1	0	2	1	0	1	4	18
d__Bacteria	k__norank_d__Bacteria	p__Gemmatimonadota	c__Gemmatimonadetes	o__Gemmatimonadales	f__Gemmatimonadaceae	g__norank_f__Gemmatimonadaceae	s__unclassified_g__norank_f__Gemmatimonadaceae	OTU679	24	9	14	4	8	14	14	9	18	25	13	15	167
d__Bacteria	k__norank_d__Bacteria	p__Bacteroidota	c__Bacteroidia	o__Chitinophagales	f__Chitinophagaceae	g__Niastella	s__uncultured_bacterium_g__Niastella	OTU3786	1	3	3	1	3	5	3	1	1	2	1	2	26
d__Bacteria	k__norank_d__Bacteria	p__Elusimicrobiota	c__Lineage_IIb	o__norank_c__Lineage_IIb	f__norank_o__norank_c__Lineage_IIb	g__norank_f__norank_o__norank_c__Lineage_IIb	s__uncultured_bacterium_g__norank_f__norank_o__norank_c__Lineage_IIb	OTU2095	0	0	2	1	1	0	1	2	2	0	1	0	10
d__Bacteria	k__norank_d__Bacteria	p__Planctomycetota	c__Planctomycetes	o__Gemmatales	f__Gemmataceae	g__norank_f__Gemmataceae	s__uncultured_bacterium_g__norank_f__Gemmataceae	OTU2749	15	14	13	18	14	3	11	20	11	5	7	5	136
d__Bacteria	k__norank_d__Bacteria	p__Bacteroidota	c__Bacteroidia	o__Chitinophagales	f__Chitinophagaceae	g__Flavihumibacter	s__uncultured_bacterium_g__Flavihumibacter	OTU765	12	15	19	9	7	7	15	15	15	17	20	11	162
d__Bacteria	k__norank_d__Bacteria	p__Cyanobacteria	c__Cyanobacteriia	o__Cyanobacteriales	f__Coleofasciculaceae	g__Microcoleus_Es-Yyy1400	s__unclassified_g__Microcoleus_Es-Yyy1400	OTU4757	0	0	1	2	0	1	2	9	1	0	0	0	16
d__Bacteria	k__norank_d__Bacteria	p__Chloroflexi	c__Anaerolineae	o__unclassified_c__Anaerolineae	f__unclassified_c__Anaerolineae	g__unclassified_c__Anaerolineae	s__unclassified_c__Anaerolineae	OTU3435	21	33	29	19	37	32	18	20	23	17	28	17	294
d__Bacteria	k__norank_d__Bacteria	p__Firmicutes	c__Clostridia	o__Lachnospirales	f__Defluviitaleaceae	g__Defluviitalea	s__unclassified_g__Defluviitalea	OTU1989	1	0	0	1	0	0	0	1	0	0	0	2	5
d__Bacteria	k__norank_d__Bacteria	p__Firmicutes	c__Limnochordia	o__Limnochordales	f__Limnochordaceae	g__norank_f__Limnochordaceae	s__uncultured_compost_bacterium_g__norank_f__Limnochordaceae	OTU3921	5	3	5	4	1	6	4	2	4	1	0	5	40
d__Bacteria	k__norank_d__Bacteria	p__Actinobacteriota	c__Actinobacteria	o__Euzebyales	f__Euzebyaceae	g__unclassified_f__Euzebyaceae	s__unclassified_f__Euzebyaceae	OTU3345	0	0	0	0	0	0	1	1	1	1	0	1	5
d__Bacteria	k__norank_d__Bacteria	p__Chloroflexi	c__OLB14	o__norank_c__OLB14	f__norank_o__norank_c__OLB14	g__norank_f__norank_o__norank_c__OLB14	s__uncultured_bacterium_g__norank_f__norank_o__norank_c__OLB14	OTU1077	2	2	2	1	4	1	0	2	0	0	4	1	19
d__Bacteria	k__norank_d__Bacteria	p__Chloroflexi	c__Chloroflexia	o__Chloroflexales	f__Roseiflexaceae	g__norank_f__Roseiflexaceae	s__uncultured_soil_bacterium_g__norank_f__Roseiflexaceae	OTU2775	7	8	5	9	3	10	3	1	5	3	1	1	56
d__Bacteria	k__norank_d__Bacteria	p__Desulfobacterota	c__Desulfuromonadia	o__Geobacterales	f__Geobacteraceae	g__unclassified_f__Geobacteraceae	s__unclassified_f__Geobacteraceae	OTU2201	0	0	0	1	0	0	1	0	0	0	1	0	3
d__Bacteria	k__norank_d__Bacteria	p__Patescibacteria	c__Saccharimonadia	o__Saccharimonadales	f__Saccharimonadaceae	g__unclassified_f__Saccharimonadaceae	s__unclassified_f__Saccharimonadaceae	OTU590	0	0	2	0	0	1	0	0	0	0	0	0	3
d__Bacteria	k__norank_d__Bacteria	p__Verrucomicrobiota	c__Verrucomicrobiae	o__Verrucomicrobiales	f__Verrucomicrobiaceae	g__Prosthecobacter	s__unclassified_g__Prosthecobacter	OTU1510	0	0	0	0	1	1	0	0	1	0	0	0	3
d__Bacteria	k__norank_d__Bacteria	p__Bacteroidota	c__Bacteroidia	o__Flavobacteriales	f__Cryomorphaceae	g__Vicingus	s__uncultured_sediment_bacterium_g__Vicingus	OTU1380	0	0	2	0	0	0	0	0	0	0	1	0	3
d__Bacteria	k__norank_d__Bacteria	p__Chloroflexi	c__Anaerolineae	o__SBR1031	f__norank_o__SBR1031	g__norank_f__norank_o__SBR1031	s__metagenome_g__norank_f__norank_o__SBR1031	OTU1294	3	1	2	1	2	0	2	3	2	1	1	0	18
d__Bacteria	k__norank_d__Bacteria	p__Firmicutes	c__Limnochordia	o__norank_c__Limnochordia	f__norank_o__norank_c__Limnochordia	g__Hydrogenispora	s__uncultured_bacterium_g__Hydrogenispora	OTU2327	1	1	2	1	2	1	3	3	0	0	3	1	18
d__Bacteria	k__norank_d__Bacteria	p__Chloroflexi	c__Anaerolineae	o__Ardenticatenales	f__norank_o__Ardenticatenales	g__norank_f__norank_o__Ardenticatenales	s__unclassified_g__norank_f__norank_o__Ardenticatenales	OTU3707	0	0	0	1	1	2	1	2	1	0	2	0	10
d__Bacteria	k__norank_d__Bacteria	p__Myxococcota	c__Polyangia	o__unclassified_c__Polyangia	f__unclassified_c__Polyangia	g__unclassified_c__Polyangia	s__unclassified_c__Polyangia	OTU4416	0	1	0	0	1	0	3	1	1	0	0	0	7
d__Bacteria	k__norank_d__Bacteria	p__Myxococcota	c__Myxococcia	o__Myxococcales	f__Myxococcaceae	g__P3OB-42	s__unclassified_g__P3OB-42	OTU2693	0	1	0	0	1	0	0	0	0	0	0	0	2
d__Bacteria	k__norank_d__Bacteria	p__Proteobacteria	c__Alphaproteobacteria	o__Azospirillales	f__Azospirillales_Incertae_Sedis	g__Stella	s__metagenome_g__Stella	OTU4031	7	11	7	4	6	6	6	4	11	7	4	5	78
d__Bacteria	k__norank_d__Bacteria	p__Chloroflexi	c__Anaerolineae	o__SBR1031	f__A4b	g__norank_f__A4b	s__uncultured_bacterium_g__norank_f__A4b	OTU1991	18	14	22	16	10	22	4	11	3	12	16	13	161
d__Bacteria	k__norank_d__Bacteria	p__Acidobacteriota	c__Vicinamibacteria	o__Vicinamibacterales	f__norank_o__Vicinamibacterales	g__norank_f__norank_o__Vicinamibacterales	s__unclassified_g__norank_f__norank_o__Vicinamibacterales	OTU3270	5	0	2	2	1	0	4	7	4	0	3	1	29
d__Bacteria	k__norank_d__Bacteria	p__Actinobacteriota	c__Thermoleophilia	o__Solirubrobacterales	f__67-14	g__norank_f__67-14	s__uncultured_bacterium_g__norank_f__67-14	OTU1624	1	1	1	0	0	1	0	0	1	0	0	0	5
d__Bacteria	k__norank_d__Bacteria	p__Acidobacteriota	c__Vicinamibacteria	o__Vicinamibacterales	f__norank_o__Vicinamibacterales	g__norank_f__norank_o__Vicinamibacterales	s__unclassified_g__norank_f__norank_o__Vicinamibacterales	OTU3276	1	2	0	2	4	1	4	4	0	0	2	0	20
d__Bacteria	k__norank_d__Bacteria	p__Actinobacteriota	c__Thermoleophilia	o__unclassified_c__Thermoleophilia	f__unclassified_c__Thermoleophilia	g__unclassified_c__Thermoleophilia	s__unclassified_c__Thermoleophilia	OTU3462	0	0	0	0	0	0	2	1	0	1	0	0	4
d__Bacteria	k__norank_d__Bacteria	p__Chloroflexi	c__Chloroflexia	o__Thermomicrobiales	f__AKYG1722	g__norank_f__AKYG1722	s__uncultured_Chloroflexi_bacterium_g__norank_f__AKYG1722	OTU46	32	41	31	31	29	32	23	31	19	29	22	35	355
d__Bacteria	k__norank_d__Bacteria	p__Firmicutes	c__unclassified_p__Firmicutes	o__unclassified_p__Firmicutes	f__unclassified_p__Firmicutes	g__unclassified_p__Firmicutes	s__unclassified_p__Firmicutes	OTU5531	0	0	1	0	0	0	0	0	0	0	0	2	3
d__Bacteria	k__norank_d__Bacteria	p__Chloroflexi	c__Chloroflexia	o__Thermomicrobiales	f__JG30-KF-CM45	g__norank_f__JG30-KF-CM45	s__unclassified_g__norank_f__JG30-KF-CM45	OTU1071	0	0	1	1	0	1	5	3	1	1	0	1	14
d__Bacteria	k__norank_d__Bacteria	p__Firmicutes	c__Bacilli	o__Caldalkalibacillales	f__Caldalkalibacillaceae	g__Caldalkalibacillus	s__unclassified_g__Caldalkalibacillus	OTU1803	2	3	3	2	2	0	2	1	1	1	0	0	17
d__Bacteria	k__norank_d__Bacteria	p__Latescibacterota	c__norank_p__Latescibacterota	o__norank_c__norank_p__Latescibacterota	f__norank_o__norank_c__norank_p__Latescibacterota	g__norank_f__norank_o__norank_c__norank_p__Latescibacterota	s__uncultured_prokaryote_g__norank_f__norank_o__norank_c__norank_p__Latescibacterota	OTU2338	1	1	0	1	0	0	0	0	0	0	0	2	5
d__Bacteria	k__norank_d__Bacteria	p__Patescibacteria	c__Saccharimonadia	o__Saccharimonadales	f__unclassified_o__Saccharimonadales	g__unclassified_o__Saccharimonadales	s__unclassified_o__Saccharimonadales	OTU4773	0	0	0	0	1	0	0	1	1	2	0	0	5
d__Bacteria	k__norank_d__Bacteria	p__Patescibacteria	c__Saccharimonadia	o__Saccharimonadales	f__unclassified_o__Saccharimonadales	g__unclassified_o__Saccharimonadales	s__unclassified_o__Saccharimonadales	OTU4778	0	0	1	2	0	1	0	2	0	1	1	0	8
d__Bacteria	k__norank_d__Bacteria	p__unclassified_k__norank_d__Bacteria	c__unclassified_k__norank_d__Bacteria	o__unclassified_k__norank_d__Bacteria	f__unclassified_k__norank_d__Bacteria	g__unclassified_k__norank_d__Bacteria	s__unclassified_k__norank_d__Bacteria	OTU4761	0	0	0	0	0	0	0	1	1	0	0	0	2
d__Bacteria	k__norank_d__Bacteria	p__Patescibacteria	c__Saccharimonadia	o__Saccharimonadales	f__S32	g__TM7	s__unclassified_g__TM7	OTU330	1	7	1	0	1	3	2	6	4	1	1	4	31
d__Bacteria	k__norank_d__Bacteria	p__Chloroflexi	c__JG30-KF-CM66	o__norank_c__JG30-KF-CM66	f__norank_o__norank_c__JG30-KF-CM66	g__norank_f__norank_o__norank_c__JG30-KF-CM66	s__uncultured_bacterium_g__norank_f__norank_o__norank_c__JG30-KF-CM66	OTU4237	19	34	35	25	15	24	28	30	27	28	20	18	303
d__Bacteria	k__norank_d__Bacteria	p__Firmicutes	c__Bacilli	o__Bacillales	f__unclassified_o__Bacillales	g__unclassified_o__Bacillales	s__unclassified_o__Bacillales	OTU5181	2	6	7	3	1	2	1	1	2	5	1	2	33
d__Bacteria	k__norank_d__Bacteria	p__Myxococcota	c__Myxococcia	o__Myxococcales	f__Anaeromyxobacteraceae	g__Anaeromyxobacter	s__uncultured_bacterium_g__Anaeromyxobacter	OTU591	0	2	0	0	0	0	0	0	0	0	0	0	2
d__Bacteria	k__norank_d__Bacteria	p__Gemmatimonadota	c__Longimicrobia	o__Longimicrobiales	f__Longimicrobiaceae	g__norank_f__Longimicrobiaceae	s__uncultured_bacterium_g__norank_f__Longimicrobiaceae	OTU2091	1	0	0	2	0	1	0	1	0	1	1	1	8
d__Bacteria	k__norank_d__Bacteria	p__Myxococcota	c__Polyangia	o__Haliangiales	f__Haliangiaceae	g__Haliangium	s__unclassified_g__Haliangium	OTU4907	0	0	0	0	0	0	0	0	1	1	0	0	2
d__Bacteria	k__norank_d__Bacteria	p__Planctomycetota	c__Planctomycetes	o__Gemmatales	f__Gemmataceae	g__norank_f__Gemmataceae	s__uncultured_bacterium_g__norank_f__Gemmataceae	OTU1326	0	0	1	0	0	0	0	0	0	0	1	0	2
d__Bacteria	k__norank_d__Bacteria	p__Firmicutes	c__Bacilli	o__Thermoactinomycetales	f__Thermoactinomycetaceae	g__Shimazuella	s__unclassified_g__Shimazuella	OTU382	1	2	2	1	1	2	2	2	1	2	1	2	19
d__Bacteria	k__norank_d__Bacteria	p__Actinobacteriota	c__Acidimicrobiia	o__unclassified_c__Acidimicrobiia	f__unclassified_c__Acidimicrobiia	g__unclassified_c__Acidimicrobiia	s__unclassified_c__Acidimicrobiia	OTU3088	3	1	8	1	2	2	2	1	5	1	2	2	30
d__Bacteria	k__norank_d__Bacteria	p__Proteobacteria	c__Gammaproteobacteria	o__Pseudomonadales	f__Moraxellaceae	g__norank_f__Moraxellaceae	s__unclassified_g__norank_f__Moraxellaceae	OTU1571	1	1	2	0	0	2	0	0	0	0	0	0	6
d__Bacteria	k__norank_d__Bacteria	p__Proteobacteria	c__Alphaproteobacteria	o__Sphingomonadales	f__Sphingomonadaceae	g__Erythrobacter	s__unclassified_g__Erythrobacter	OTU3916	0	1	2	4	0	0	2	0	0	1	2	1	13
d__Bacteria	k__norank_d__Bacteria	p__Myxococcota	c__Polyangia	o__Polyangiales	f__BIrii41	g__norank_f__BIrii41	s__uncultured_bacterium_g__norank_f__BIrii41	OTU4135	0	1	2	0	2	0	3	0	2	1	1	0	12
d__Bacteria	k__norank_d__Bacteria	p__Firmicutes	c__Thermovenabulia	o__Thermovenabulales	f__norank_o__Thermovenabulales	g__Tepidanaerobacter	s__uncultured_bacterium_g__Tepidanaerobacter	OTU5303	0	0	0	0	0	0	0	2	0	0	1	1	4
d__Bacteria	k__norank_d__Bacteria	p__Firmicutes	c__Bacilli	o__Bacillales	f__Planococcaceae	g__Sporosarcina	s__uncultured_bacterium_g__Sporosarcina	OTU1202	7	12	6	5	5	6	5	4	6	6	6	3	71
d__Bacteria	k__norank_d__Bacteria	p__Proteobacteria	c__Alphaproteobacteria	o__Tistrellales	f__Geminicoccaceae	g__norank_f__Geminicoccaceae	s__unclassified_g__norank_f__Geminicoccaceae	OTU964	1	0	2	0	1	1	0	1	2	1	0	0	9
d__Bacteria	k__norank_d__Bacteria	p__Dependentiae	c__Babeliae	o__Babeliales	f__Vermiphilaceae	g__norank_f__Vermiphilaceae	s__unclassified_g__norank_f__Vermiphilaceae	OTU2902	1	0	2	1	2	1	2	2	4	5	2	5	27
d__Bacteria	k__norank_d__Bacteria	p__Chloroflexi	c__Chloroflexia	o__Chloroflexales	f__Roseiflexaceae	g__norank_f__Roseiflexaceae	s__uncultured_bacterium_g__norank_f__Roseiflexaceae	OTU3104	0	0	1	0	2	0	0	0	0	0	1	1	5
d__Bacteria	k__norank_d__Bacteria	p__Chloroflexi	c__JG30-KF-CM66	o__norank_c__JG30-KF-CM66	f__norank_o__norank_c__JG30-KF-CM66	g__norank_f__norank_o__norank_c__JG30-KF-CM66	s__unclassified_g__norank_f__norank_o__norank_c__JG30-KF-CM66	OTU2614	0	0	0	1	1	0	0	0	0	0	1	0	3
d__Bacteria	k__norank_d__Bacteria	p__Planctomycetota	c__Planctomycetes	o__Gemmatales	f__Gemmataceae	g__norank_f__Gemmataceae	s__unclassified_g__norank_f__Gemmataceae	OTU5507	1	1	1	1	2	0	0	2	0	1	2	1	12
d__Bacteria	k__norank_d__Bacteria	p__RCP2-54	c__norank_p__RCP2-54	o__norank_c__norank_p__RCP2-54	f__norank_o__norank_c__norank_p__RCP2-54	g__norank_f__norank_o__norank_c__norank_p__RCP2-54	s__uncultured_prokaryote_g__norank_f__norank_o__norank_c__norank_p__RCP2-54	OTU3733	1	2	0	2	2	1	1	0	1	0	0	1	11
d__Bacteria	k__norank_d__Bacteria	p__Actinobacteriota	c__Actinobacteria	o__Micromonosporales	f__Micromonosporaceae	g__unclassified_f__Micromonosporaceae	s__unclassified_f__Micromonosporaceae	OTU949	26	46	27	49	47	73	8	33	11	57	26	7	410
d__Bacteria	k__norank_d__Bacteria	p__Methylomirabilota	c__Methylomirabilia	o__Rokubacteriales	f__norank_o__Rokubacteriales	g__norank_f__norank_o__Rokubacteriales	s__uncultured_bacterium_g__norank_f__norank_o__Rokubacteriales	OTU43	122	152	114	112	168	109	175	156	171	140	114	112	1645
d__Bacteria	k__norank_d__Bacteria	p__Chloroflexi	c__Anaerolineae	o__RBG-13-54-9	f__norank_o__RBG-13-54-9	g__norank_f__norank_o__RBG-13-54-9	s__uncultured_soil_bacterium_g__norank_f__norank_o__RBG-13-54-9	OTU987	0	3	3	8	3	1	1	5	2	1	1	0	28
d__Bacteria	k__norank_d__Bacteria	p__Proteobacteria	c__Alphaproteobacteria	o__Rhizobiales	f__KF-JG30-B3	g__norank_f__KF-JG30-B3	s__unclassified_g__norank_f__KF-JG30-B3	OTU4275	1	7	3	6	3	3	7	7	3	5	8	9	62
d__Bacteria	k__norank_d__Bacteria	p__Proteobacteria	c__Alphaproteobacteria	o__Sphingomonadales	f__Sphingomonadaceae	g__Sphingomonas	s__bacterium_g__Sphingomonas	OTU3669	0	0	5	1	1	0	1	0	0	0	0	0	8
d__Bacteria	k__norank_d__Bacteria	p__Bdellovibrionota	c__Bdellovibrionia	o__Bdellovibrionales	f__Bdellovibrionaceae	g__OM27_clade	s__unclassified_g__OM27_clade	OTU4047	7	5	6	1	3	2	3	9	5	7	6	6	60
d__Bacteria	k__norank_d__Bacteria	p__Proteobacteria	c__Alphaproteobacteria	o__Rickettsiales	f__SM2D12	g__norank_f__SM2D12	s__metagenome_g__norank_f__SM2D12	OTU4295	1	0	0	0	1	0	1	0	1	0	0	0	4
d__Bacteria	k__norank_d__Bacteria	p__Firmicutes	c__Clostridia	o__Clostridiales	f__Oxobacteraceae	g__Oxobacter	s__uncultured_bacterium_g__Oxobacter	OTU5292	0	0	0	1	0	0	0	0	0	0	1	0	2
d__Bacteria	k__norank_d__Bacteria	p__Acidobacteriota	c__Acidobacteriae	o__Solibacterales	f__Solibacteraceae	g__Candidatus_Solibacter	s__unclassified_g__Candidatus_Solibacter	OTU1520	1	1	1	0	2	1	3	2	3	2	1	1	18
d__Bacteria	k__norank_d__Bacteria	p__Proteobacteria	c__Alphaproteobacteria	o__unclassified_c__Alphaproteobacteria	f__unclassified_c__Alphaproteobacteria	g__unclassified_c__Alphaproteobacteria	s__unclassified_c__Alphaproteobacteria	OTU5211	0	0	0	1	0	0	0	0	0	1	1	0	3
d__Bacteria	k__norank_d__Bacteria	p__Chloroflexi	c__TK10	o__norank_c__TK10	f__norank_o__norank_c__TK10	g__norank_f__norank_o__norank_c__TK10	s__uncultured_bacterium_g__norank_f__norank_o__norank_c__TK10	OTU4698	0	2	0	0	0	0	4	1	1	1	2	1	12
d__Bacteria	k__norank_d__Bacteria	p__Verrucomicrobiota	c__Chlamydiae	o__Chlamydiales	f__unclassified_o__Chlamydiales	g__unclassified_o__Chlamydiales	s__unclassified_o__Chlamydiales	OTU5048	0	0	1	0	0	0	0	0	0	1	0	0	2
d__Bacteria	k__norank_d__Bacteria	p__Actinobacteriota	c__Acidimicrobiia	o__Microtrichales	f__Ilumatobacteraceae	g__norank_f__Ilumatobacteraceae	s__uncultured_bacterium_g__norank_f__Ilumatobacteraceae	OTU148	3	3	4	2	4	6	4	1	4	6	3	6	46
d__Bacteria	k__norank_d__Bacteria	p__Bacteroidota	c__Bacteroidia	o__Cytophagales	f__Cytophagaceae	g__Sporocytophaga	s__uncultured_bacterium_g__Sporocytophaga	OTU2096	1	0	0	1	0	0	0	0	0	0	0	0	2
d__Bacteria	k__norank_d__Bacteria	p__Proteobacteria	c__Gammaproteobacteria	o__Burkholderiales	f__Methylophilaceae	g__unclassified_f__Methylophilaceae	s__unclassified_f__Methylophilaceae	OTU3413	9	8	6	7	8	8	5	6	7	7	11	7	89
d__Bacteria	k__norank_d__Bacteria	p__Planctomycetota	c__Planctomycetes	o__Gemmatales	f__Gemmataceae	g__norank_f__Gemmataceae	s__unclassified_g__norank_f__Gemmataceae	OTU1040	0	0	0	0	1	0	0	0	1	0	0	0	2
d__Bacteria	k__norank_d__Bacteria	p__Planctomycetota	c__Planctomycetes	o__Gemmatales	f__Gemmataceae	g__norank_f__Gemmataceae	s__unclassified_g__norank_f__Gemmataceae	OTU1044	0	1	1	0	1	0	0	2	2	1	1	2	11
d__Bacteria	k__norank_d__Bacteria	p__Actinobacteriota	c__Thermoleophilia	o__Solirubrobacterales	f__67-14	g__norank_f__67-14	s__uncultured_bacterium_g__norank_f__67-14	OTU3663	2	2	0	1	2	0	1	0	1	0	0	2	11
d__Bacteria	k__norank_d__Bacteria	p__Planctomycetota	c__Planctomycetes	o__Gemmatales	f__Gemmataceae	g__norank_f__Gemmataceae	s__uncultured_bacterium_g__norank_f__Gemmataceae	OTU935	4	0	5	2	3	0	1	1	3	0	1	2	22
d__Bacteria	k__norank_d__Bacteria	p__Chloroflexi	c__Anaerolineae	o__SBR1031	f__norank_o__SBR1031	g__norank_f__norank_o__SBR1031	s__unclassified_g__norank_f__norank_o__SBR1031	OTU466	1	1	0	0	0	1	0	1	0	0	0	0	4
d__Bacteria	k__norank_d__Bacteria	p__Gemmatimonadota	c__S0134_terrestrial_group	o__norank_c__S0134_terrestrial_group	f__norank_o__norank_c__S0134_terrestrial_group	g__norank_f__norank_o__norank_c__S0134_terrestrial_group	s__uncultured_bacterium_g__norank_f__norank_o__norank_c__S0134_terrestrial_group	OTU339	3	7	4	3	3	3	2	3	2	8	2	3	43
d__Bacteria	k__norank_d__Bacteria	p__Firmicutes	c__Bacilli	o__Haloplasmatales	f__Haloplasmataceae	g__Haloplasma	s__unclassified_g__Haloplasma	OTU5281	2	1	0	3	0	2	1	2	0	2	1	2	16
d__Bacteria	k__norank_d__Bacteria	p__Firmicutes	c__Bacilli	o__Brevibacillales	f__Brevibacillaceae	g__Brevibacillus	s__unclassified_g__Brevibacillus	OTU572	0	0	0	1	0	0	2	0	0	1	0	1	5
d__Bacteria	k__norank_d__Bacteria	p__Acidobacteriota	c__Vicinamibacteria	o__Subgroup_17	f__norank_o__Subgroup_17	g__norank_f__norank_o__Subgroup_17	s__uncultured_bacterium_g__norank_f__norank_o__Subgroup_17	OTU4344	5	7	8	5	5	5	6	20	13	2	3	5	84
d__Bacteria	k__norank_d__Bacteria	p__Proteobacteria	c__Alphaproteobacteria	o__Acetobacterales	f__Acetobacteraceae	g__unclassified_f__Acetobacteraceae	s__unclassified_f__Acetobacteraceae	OTU5023	0	0	0	0	0	1	0	0	2	1	1	0	5
d__Bacteria	k__norank_d__Bacteria	p__Acidobacteriota	c__Vicinamibacteria	o__Vicinamibacterales	f__Vicinamibacteraceae	g__norank_f__Vicinamibacteraceae	s__unclassified_g__norank_f__Vicinamibacteraceae	OTU1206	1	3	4	3	8	1	3	11	7	5	9	12	67
d__Bacteria	k__norank_d__Bacteria	p__Chloroflexi	c__Anaerolineae	o__Caldilineales	f__Caldilineaceae	g__norank_f__Caldilineaceae	s__unclassified_g__norank_f__Caldilineaceae	OTU484	1	20	3	0	4	4	1	2	2	5	1	0	43
d__Bacteria	k__norank_d__Bacteria	p__Actinobacteriota	c__Actinobacteria	o__0319-7L14	f__norank_o__0319-7L14	g__norank_f__norank_o__0319-7L14	s__uncultured_bacterium_g__norank_f__norank_o__0319-7L14	OTU2010	0	0	0	1	0	0	0	1	0	1	1	0	4
d__Bacteria	k__norank_d__Bacteria	p__Actinobacteriota	c__Actinobacteria	o__Propionibacteriales	f__Nocardioidaceae	g__Nocardioides	s__unclassified_g__Nocardioides	OTU1631	3	2	2	4	3	1	3	0	1	4	5	0	28
d__Bacteria	k__norank_d__Bacteria	p__Chloroflexi	c__Chloroflexia	o__Thermomicrobiales	f__Thermomicrobiaceae	g__Sphaerobacter	s__uncultured_bacterium_g__Sphaerobacter	OTU1882	0	1	0	1	0	0	0	0	0	0	0	1	3
d__Bacteria	k__norank_d__Bacteria	p__Actinobacteriota	c__Actinobacteria	o__Propionibacteriales	f__Nocardioidaceae	g__unclassified_f__Nocardioidaceae	s__unclassified_f__Nocardioidaceae	OTU3139	3	1	0	0	3	7	2	1	1	3	1	2	24
d__Bacteria	k__norank_d__Bacteria	p__Proteobacteria	c__Alphaproteobacteria	o__Azospirillales	f__Azospirillaceae	g__Skermanella	s__uncultured_bacterium_g__Skermanella	OTU1117	1	3	0	0	1	0	1	3	0	1	0	0	10
d__Bacteria	k__norank_d__Bacteria	p__Elusimicrobiota	c__Elusimicrobia	o__Lineage_IV	f__norank_o__Lineage_IV	g__norank_f__norank_o__Lineage_IV	s__unclassified_g__norank_f__norank_o__Lineage_IV	OTU4621	1	0	0	0	0	0	0	1	0	0	1	0	3
d__Bacteria	k__norank_d__Bacteria	p__Hydrogenedentes	c__Hydrogenedentia	o__Hydrogenedentiales	f__Hydrogenedensaceae	g__norank_f__Hydrogenedensaceae	s__uncultured_delta_proteobacterium_g__norank_f__Hydrogenedensaceae	OTU801	0	1	1	0	0	0	0	0	1	0	0	0	3
d__Bacteria	k__norank_d__Bacteria	p__Firmicutes	c__Bacilli	o__Paenibacillales	f__Paenibacillaceae	g__Paenibacillus	s__Paenibacillus_crassostreae	OTU4968	0	0	0	1	0	0	0	1	0	2	0	1	5
d__Bacteria	k__norank_d__Bacteria	p__Chloroflexi	c__Anaerolineae	o__Caldilineales	f__Caldilineaceae	g__Litorilinea	s__unclassified_g__Litorilinea	OTU3031	4	0	2	1	2	1	0	3	2	0	2	0	17
d__Bacteria	k__norank_d__Bacteria	p__Acidobacteriota	c__Acidobacteriae	o__Bryobacterales	f__Bryobacteraceae	g__Bryobacter	s__uncultured_bacterium_g__Bryobacter	OTU2897	2	0	3	2	2	0	1	1	4	1	0	3	19
d__Bacteria	k__norank_d__Bacteria	p__unclassified_k__norank_d__Bacteria	c__unclassified_k__norank_d__Bacteria	o__unclassified_k__norank_d__Bacteria	f__unclassified_k__norank_d__Bacteria	g__unclassified_k__norank_d__Bacteria	s__unclassified_k__norank_d__Bacteria	OTU4224	8	7	15	6	6	4	14	11	9	10	16	10	116
d__Bacteria	k__norank_d__Bacteria	p__Actinobacteriota	c__Actinobacteria	o__Micrococcales	f__Brevibacteriaceae	g__Brevibacterium	s__Brevibacterium_iodinum	OTU2340	0	0	0	7	6	3	0	0	0	0	1	0	17
d__Bacteria	k__norank_d__Bacteria	p__Planctomycetota	c__Planctomycetes	o__Gemmatales	f__Gemmataceae	g__norank_f__Gemmataceae	s__unclassified_g__norank_f__Gemmataceae	OTU3766	0	1	2	1	3	1	2	4	1	0	2	2	19
d__Bacteria	k__norank_d__Bacteria	p__Patescibacteria	c__Saccharimonadia	o__Saccharimonadales	f__LWQ8	g__norank_f__LWQ8	s__uncultured_bacterium_g__norank_f__LWQ8	OTU352	12	9	8	8	13	4	4	9	3	8	2	2	82
d__Bacteria	k__norank_d__Bacteria	p__Proteobacteria	c__Alphaproteobacteria	o__Rickettsiales	f__SM2D12	g__norank_f__SM2D12	s__metagenome_g__norank_f__SM2D12	OTU2354	2	0	0	2	0	1	0	0	0	0	0	0	5
d__Bacteria	k__norank_d__Bacteria	p__Acidobacteriota	c__Subgroup_22	o__norank_c__Subgroup_22	f__norank_o__norank_c__Subgroup_22	g__norank_f__norank_o__norank_c__Subgroup_22	s__uncultured_bacterium_g__norank_f__norank_o__norank_c__Subgroup_22	OTU1731	1	2	3	3	4	0	2	1	2	2	0	0	20
d__Bacteria	k__norank_d__Bacteria	p__Myxococcota	c__bacteriap25	o__norank_c__bacteriap25	f__norank_o__norank_c__bacteriap25	g__norank_f__norank_o__norank_c__bacteriap25	s__unclassified_g__norank_f__norank_o__norank_c__bacteriap25	OTU4573	0	0	0	0	1	0	0	2	0	0	0	0	3
d__Bacteria	k__norank_d__Bacteria	p__Firmicutes	c__Bacilli	o__Paenibacillales	f__Paenibacillaceae	g__unclassified_f__Paenibacillaceae	s__unclassified_f__Paenibacillaceae	OTU2740	1	0	0	2	3	2	4	1	1	5	3	3	25
d__Bacteria	k__norank_d__Bacteria	p__Chloroflexi	c__Chloroflexia	o__Thermomicrobiales	f__JG30-KF-CM45	g__norank_f__JG30-KF-CM45	s__metagenome_g__norank_f__JG30-KF-CM45	OTU721	30	27	43	43	35	35	36	33	30	27	30	41	410
d__Bacteria	k__norank_d__Bacteria	p__Verrucomicrobiota	c__Chlamydiae	o__Chlamydiales	f__Parachlamydiaceae	g__norank_f__Parachlamydiaceae	s__unclassified_g__norank_f__Parachlamydiaceae	OTU2531	0	0	0	0	1	0	0	0	1	0	1	0	3
d__Bacteria	k__norank_d__Bacteria	p__Proteobacteria	c__Gammaproteobacteria	o__Diplorickettsiales	f__Diplorickettsiaceae	g__norank_f__Diplorickettsiaceae	s__uncultured_Coxiellaceae_bacterium_g__norank_f__Diplorickettsiaceae	OTU3	1	0	0	0	0	0	0	0	0	0	0	0	1
d__Bacteria	k__norank_d__Bacteria	p__Planctomycetota	c__Phycisphaerae	o__Tepidisphaerales	f__WD2101_soil_group	g__norank_f__WD2101_soil_group	s__uncultured_bacterium_g__norank_f__WD2101_soil_group	OTU2700	1	2	7	5	5	1	6	5	4	2	5	4	47
d__Bacteria	k__norank_d__Bacteria	p__Planctomycetota	c__Planctomycetes	o__Isosphaerales	f__Isosphaeraceae	g__unclassified_f__Isosphaeraceae	s__unclassified_f__Isosphaeraceae	OTU5333	2	1	0	0	1	0	1	0	0	0	1	0	6
d__Bacteria	k__norank_d__Bacteria	p__Actinobacteriota	c__Thermoleophilia	o__Solirubrobacterales	f__67-14	g__norank_f__67-14	s__metagenome_g__norank_f__67-14	OTU3847	38	37	28	15	15	20	19	19	32	32	22	32	309
d__Bacteria	k__norank_d__Bacteria	p__unclassified_k__norank_d__Bacteria	c__unclassified_k__norank_d__Bacteria	o__unclassified_k__norank_d__Bacteria	f__unclassified_k__norank_d__Bacteria	g__unclassified_k__norank_d__Bacteria	s__unclassified_k__norank_d__Bacteria	OTU1076	0	0	0	0	0	0	0	0	0	0	1	0	1
d__Bacteria	k__norank_d__Bacteria	p__Methylomirabilota	c__Methylomirabilia	o__Rokubacteriales	f__norank_o__Rokubacteriales	g__norank_f__norank_o__Rokubacteriales	s__uncultured_bacterium_g__norank_f__norank_o__Rokubacteriales	OTU3584	2	3	4	0	3	2	5	2	3	5	2	2	33
d__Bacteria	k__norank_d__Bacteria	p__Proteobacteria	c__Gammaproteobacteria	o__Pseudomonadales	f__Pseudomonadaceae	g__Pseudomonas	s__unclassified_g__Pseudomonas	OTU1540	40	50	47	44	30	45	29	26	21	36	29	29	426
d__Bacteria	k__norank_d__Bacteria	p__Acidobacteriota	c__Acidobacteriae	o__Solibacterales	f__Solibacteraceae	g__Candidatus_Solibacter	s__unclassified_g__Candidatus_Solibacter	OTU3961	0	0	0	2	0	0	2	0	0	0	0	0	4
d__Bacteria	k__norank_d__Bacteria	p__Acidobacteriota	c__Vicinamibacteria	o__Vicinamibacterales	f__Vicinamibacteraceae	g__norank_f__Vicinamibacteraceae	s__unclassified_g__norank_f__Vicinamibacteraceae	OTU4665	79	49	72	67	68	53	86	128	92	51	67	102	914
d__Bacteria	k__norank_d__Bacteria	p__Bacteroidota	c__Bacteroidia	o__Cytophagales	f__Microscillaceae	g__norank_f__Microscillaceae	s__unclassified_g__norank_f__Microscillaceae	OTU2046	0	2	0	1	0	1	1	0	1	1	4	1	12
d__Bacteria	k__norank_d__Bacteria	p__Actinobacteriota	c__Actinobacteria	o__Pseudonocardiales	f__Pseudonocardiaceae	g__unclassified_f__Pseudonocardiaceae	s__unclassified_f__Pseudonocardiaceae	OTU3602	6	1	7	3	0	6	13	7	6	11	4	13	77
d__Bacteria	k__norank_d__Bacteria	p__Verrucomicrobiota	c__Verrucomicrobiae	o__Pedosphaerales	f__Pedosphaeraceae	g__Oikopleura	s__uncultured_bacterium_g__Oikopleura	OTU1179	7	2	4	2	3	1	4	0	11	2	3	3	42
d__Bacteria	k__norank_d__Bacteria	p__Actinobacteriota	c__Actinobacteria	o__Frankiales	f__Nakamurellaceae	g__Nakamurella	s__Nakamurella_multipartita_DSM_44233	OTU2684	2	4	3	1	1	8	3	1	2	0	0	1	26
d__Bacteria	k__norank_d__Bacteria	p__Myxococcota	c__unclassified_p__Myxococcota	o__unclassified_p__Myxococcota	f__unclassified_p__Myxococcota	g__unclassified_p__Myxococcota	s__unclassified_p__Myxococcota	OTU2341	0	0	0	1	0	0	0	0	0	0	0	0	1
d__Bacteria	k__norank_d__Bacteria	p__Proteobacteria	c__Gammaproteobacteria	o__Legionellales	f__Legionellaceae	g__Legionella	s__unclassified_g__Legionella	OTU2781	0	1	0	0	1	0	0	0	0	0	0	0	2
d__Bacteria	k__norank_d__Bacteria	p__Planctomycetota	c__Planctomycetes	o__Gemmatales	f__Gemmataceae	g__norank_f__Gemmataceae	s__uncultured_bacterium_g__norank_f__Gemmataceae	OTU1469	0	0	0	1	0	0	0	0	0	0	0	0	1
d__Bacteria	k__norank_d__Bacteria	p__Planctomycetota	c__Planctomycetes	o__Gemmatales	f__Gemmataceae	g__Gemmata	s__uncultured_bacterium_g__Gemmata	OTU3363	1	1	0	2	1	0	2	1	3	0	2	2	15
d__Bacteria	k__norank_d__Bacteria	p__Actinobacteriota	c__MB-A2-108	o__norank_c__MB-A2-108	f__norank_o__norank_c__MB-A2-108	g__norank_f__norank_o__norank_c__MB-A2-108	s__uncultured_bacterium_g__norank_f__norank_o__norank_c__MB-A2-108	OTU3810	1	0	0	0	0	0	3	3	8	0	3	1	19
d__Bacteria	k__norank_d__Bacteria	p__Acidobacteriota	c__Blastocatellia	o__Blastocatellales	f__Blastocatellaceae	g__norank_f__Blastocatellaceae	s__unclassified_g__norank_f__Blastocatellaceae	OTU1053	4	1	3	3	1	1	1	1	3	1	3	2	24
d__Bacteria	k__norank_d__Bacteria	p__Proteobacteria	c__Alphaproteobacteria	o__Puniceispirillales	f__Puniceispirillales_Incertae_Sedis	g__Constrictibacter	s__unclassified_g__Constrictibacter	OTU4057	0	0	0	0	0	1	1	0	0	1	0	1	4
d__Bacteria	k__norank_d__Bacteria	p__Hydrogenedentes	c__Hydrogenedentia	o__Hydrogenedentiales	f__Hydrogenedensaceae	g__norank_f__Hydrogenedensaceae	s__unclassified_g__norank_f__Hydrogenedensaceae	OTU4111	3	3	2	1	8	5	4	4	1	5	3	3	42
d__Bacteria	k__norank_d__Bacteria	p__Chloroflexi	c__Anaerolineae	o__Caldilineales	f__Caldilineaceae	g__norank_f__Caldilineaceae	s__unclassified_g__norank_f__Caldilineaceae	OTU1265	1	0	1	2	0	1	0	2	1	0	1	0	9
d__Bacteria	k__norank_d__Bacteria	p__Proteobacteria	c__Gammaproteobacteria	o__Diplorickettsiales	f__Diplorickettsiaceae	g__Aquicella	s__unclassified_g__Aquicella	OTU2414	0	2	0	0	1	0	0	0	0	1	0	0	4
d__Bacteria	k__norank_d__Bacteria	p__Chloroflexi	c__Anaerolineae	o__Caldilineales	f__Caldilineaceae	g__Litorilinea	s__unclassified_g__Litorilinea	OTU4664	0	0	1	1	1	0	1	2	2	0	0	2	10
d__Bacteria	k__norank_d__Bacteria	p__Proteobacteria	c__Gammaproteobacteria	o__norank_c__Gammaproteobacteria	f__norank_o__norank_c__Gammaproteobacteria	g__norank_f__norank_o__norank_c__Gammaproteobacteria	s__unclassified_g__norank_f__norank_o__norank_c__Gammaproteobacteria	OTU1792	4	4	6	3	7	2	4	5	7	5	5	4	56
d__Bacteria	k__norank_d__Bacteria	p__Planctomycetota	c__Planctomycetes	o__Pirellulales	f__Pirellulaceae	g__norank_f__Pirellulaceae	s__unclassified_g__norank_f__Pirellulaceae	OTU3724	38	23	28	28	20	19	17	27	31	11	16	22	280
d__Bacteria	k__norank_d__Bacteria	p__Planctomycetota	c__Planctomycetes	o__Pirellulales	f__Pirellulaceae	g__norank_f__Pirellulaceae	s__unclassified_g__norank_f__Pirellulaceae	OTU852	22	18	19	24	15	6	7	19	10	2	8	29	179
d__Bacteria	k__norank_d__Bacteria	p__Proteobacteria	c__Alphaproteobacteria	o__Kiloniellales	f__Kiloniellaceae	g__Tagaea	s__uncultured_bacterium_g__Tagaea	OTU2821	0	0	1	0	0	0	0	0	0	6	2	0	9
d__Bacteria	k__norank_d__Bacteria	p__Chloroflexi	c__Anaerolineae	o__RBG-13-54-9	f__norank_o__RBG-13-54-9	g__norank_f__norank_o__RBG-13-54-9	s__uncultured_sludge_bacterium_A31	OTU4189	3	4	0	2	4	3	8	4	3	3	2	5	41
d__Bacteria	k__norank_d__Bacteria	p__Proteobacteria	c__Alphaproteobacteria	o__Caulobacterales	f__Caulobacteraceae	g__Asticcacaulis	s__uncultured_Asticcacaulis_sp.	OTU2780	0	0	0	0	2	1	0	1	3	1	0	0	8
d__Bacteria	k__norank_d__Bacteria	p__Proteobacteria	c__Alphaproteobacteria	o__Rhizobiales	f__Xanthobacteraceae	g__norank_f__Xanthobacteraceae	s__unclassified_g__norank_f__Xanthobacteraceae	OTU1842	29	32	38	37	35	33	42	26	44	57	37	37	447
d__Bacteria	k__norank_d__Bacteria	p__Planctomycetota	c__Planctomycetes	o__Gemmatales	f__Gemmataceae	g__Gemmata	s__uncultured_planctomycete_g__Gemmata	OTU3756	0	0	0	0	0	0	1	1	0	0	0	0	2
d__Bacteria	k__norank_d__Bacteria	p__Actinobacteriota	c__Acidimicrobiia	o__unclassified_c__Acidimicrobiia	f__unclassified_c__Acidimicrobiia	g__unclassified_c__Acidimicrobiia	s__unclassified_c__Acidimicrobiia	OTU4617	5	7	5	11	14	16	1	4	4	9	9	6	91
d__Bacteria	k__norank_d__Bacteria	p__Elusimicrobiota	c__Elusimicrobia	o__MVP-88	f__norank_o__MVP-88	g__norank_f__norank_o__MVP-88	s__unclassified_g__norank_f__norank_o__MVP-88	OTU516	1	0	0	0	0	0	0	0	0	0	0	0	1
d__Bacteria	k__norank_d__Bacteria	p__Proteobacteria	c__Gammaproteobacteria	o__Gammaproteobacteria_Incertae_Sedis	f__unclassified_o__Gammaproteobacteria_Incertae_Sedis	g__Candidatus_Berkiella	s__uncultured_bacterium_g__Candidatus_Berkiella	OTU3814	0	0	0	0	1	0	3	1	5	5	0	1	16
d__Bacteria	k__norank_d__Bacteria	p__Proteobacteria	c__Gammaproteobacteria	o__Burkholderiales	f__Burkholderiaceae	g__Lautropia	s__unclassified_g__Lautropia	OTU1677	14	12	10	7	6	7	6	4	5	8	7	7	93
d__Bacteria	k__norank_d__Bacteria	p__Bdellovibrionota	c__Oligoflexia	o__0319-6G20	f__norank_o__0319-6G20	g__norank_f__norank_o__0319-6G20	s__unclassified_g__norank_f__norank_o__0319-6G20	OTU3717	0	1	1	0	0	0	2	0	0	1	0	0	5
d__Bacteria	k__norank_d__Bacteria	p__unclassified_k__norank_d__Bacteria	c__unclassified_k__norank_d__Bacteria	o__unclassified_k__norank_d__Bacteria	f__unclassified_k__norank_d__Bacteria	g__unclassified_k__norank_d__Bacteria	s__unclassified_k__norank_d__Bacteria	OTU5319	0	0	0	1	0	0	0	0	1	0	2	0	4
d__Bacteria	k__norank_d__Bacteria	p__Chloroflexi	c__Chloroflexia	o__Thermomicrobiales	f__unclassified_o__Thermomicrobiales	g__unclassified_o__Thermomicrobiales	s__unclassified_o__Thermomicrobiales	OTU2630	2	4	5	5	8	0	2	4	3	1	1	2	37
d__Bacteria	k__norank_d__Bacteria	p__Firmicutes	c__Limnochordia	o__Limnochordales	f__Limnochordaceae	g__norank_f__Limnochordaceae	s__unclassified_g__norank_f__Limnochordaceae	OTU4869	1	0	0	0	0	1	1	0	2	0	1	0	6
d__Bacteria	k__norank_d__Bacteria	p__Gemmatimonadota	c__Gemmatimonadetes	o__Gemmatimonadales	f__Gemmatimonadaceae	g__Gemmatimonas	s__unclassified_g__Gemmatimonas	OTU1244	3	3	1	2	0	1	3	4	2	3	1	1	24
d__Bacteria	k__norank_d__Bacteria	p__Actinobacteriota	c__unclassified_p__Actinobacteriota	o__unclassified_p__Actinobacteriota	f__unclassified_p__Actinobacteriota	g__unclassified_p__Actinobacteriota	s__unclassified_p__Actinobacteriota	OTU3662	1	0	0	0	0	0	1	0	0	0	0	1	3
d__Bacteria	k__norank_d__Bacteria	p__Planctomycetota	c__Planctomycetes	o__Pirellulales	f__Pirellulaceae	g__norank_f__Pirellulaceae	s__unclassified_g__norank_f__Pirellulaceae	OTU3892	3	4	3	4	7	0	6	8	6	1	1	3	46
d__Bacteria	k__norank_d__Bacteria	p__Myxococcota	c__Polyangia	o__Haliangiales	f__Haliangiaceae	g__Haliangium	s__unclassified_g__Haliangium	OTU1509	1	0	1	1	0	0	0	0	1	1	0	0	5
d__Bacteria	k__norank_d__Bacteria	p__Bacteroidota	c__Bacteroidia	o__Cytophagales	f__Microscillaceae	g__Ohtaekwangia	s__metagenome_g__Ohtaekwangia	OTU2582	1	1	1	1	0	0	0	0	0	0	0	0	4
d__Bacteria	k__norank_d__Bacteria	p__Proteobacteria	c__Alphaproteobacteria	o__Rhodospirillales	f__Rhodospirillaceae	g__norank_f__Rhodospirillaceae	s__unclassified_g__norank_f__Rhodospirillaceae	OTU1760	0	1	1	0	1	1	2	1	2	0	1	0	10
d__Bacteria	k__norank_d__Bacteria	p__Chloroflexi	c__Chloroflexia	o__Chloroflexales	f__Roseiflexaceae	g__norank_f__Roseiflexaceae	s__uncultured_bacterium_g__norank_f__Roseiflexaceae	OTU3816	1	0	1	1	0	0	2	0	0	0	0	0	5
d__Bacteria	k__norank_d__Bacteria	p__Bacteroidota	c__Bacteroidia	o__Sphingobacteriales	f__AKYH767	g__norank_f__AKYH767	s__uncultured_bacterium_g__norank_f__AKYH767	OTU1429	2	2	2	1	1	3	0	2	3	2	3	3	24
d__Bacteria	k__norank_d__Bacteria	p__unclassified_k__norank_d__Bacteria	c__unclassified_k__norank_d__Bacteria	o__unclassified_k__norank_d__Bacteria	f__unclassified_k__norank_d__Bacteria	g__unclassified_k__norank_d__Bacteria	s__unclassified_k__norank_d__Bacteria	OTU2835	3	5	2	3	2	5	3	1	3	3	1	0	31
d__Bacteria	k__norank_d__Bacteria	p__Actinobacteriota	c__Actinobacteria	o__unclassified_c__Actinobacteria	f__unclassified_c__Actinobacteria	g__unclassified_c__Actinobacteria	s__unclassified_c__Actinobacteria	OTU1799	0	1	4	1	0	0	0	0	2	0	1	2	11
d__Bacteria	k__norank_d__Bacteria	p__WPS-2	c__norank_p__WPS-2	o__norank_c__norank_p__WPS-2	f__norank_o__norank_c__norank_p__WPS-2	g__norank_f__norank_o__norank_c__norank_p__WPS-2	s__Burkholderiales_bacterium_Beta_02	OTU842	0	0	1	0	1	2	0	0	0	1	1	0	6
d__Bacteria	k__norank_d__Bacteria	p__Planctomycetota	c__Planctomycetes	o__Isosphaerales	f__Isosphaeraceae	g__norank_f__Isosphaeraceae	s__uncultured_bacterium_g__norank_f__Isosphaeraceae	OTU5511	2	3	2	1	3	1	0	0	1	0	2	1	16
d__Bacteria	k__norank_d__Bacteria	p__Actinobacteriota	c__Thermoleophilia	o__Gaiellales	f__norank_o__Gaiellales	g__norank_f__norank_o__Gaiellales	s__unclassified_g__norank_f__norank_o__Gaiellales	OTU4102	0	0	3	0	1	1	1	0	1	1	1	0	9
d__Bacteria	k__norank_d__Bacteria	p__Firmicutes	c__Bacilli	o__Paenibacillales	f__Paenibacillaceae	g__Paenibacillus	s__unclassified_g__Paenibacillus	OTU5286	0	0	0	0	0	0	0	0	0	1	1	0	2
d__Bacteria	k__norank_d__Bacteria	p__unclassified_k__norank_d__Bacteria	c__unclassified_k__norank_d__Bacteria	o__unclassified_k__norank_d__Bacteria	f__unclassified_k__norank_d__Bacteria	g__unclassified_k__norank_d__Bacteria	s__unclassified_k__norank_d__Bacteria	OTU4783	0	0	0	0	2	0	0	0	1	0	0	0	3
d__Bacteria	k__norank_d__Bacteria	p__Actinobacteriota	c__Thermoleophilia	o__Solirubrobacterales	f__Solirubrobacteraceae	g__Solirubrobacter	s__unclassified_g__Solirubrobacter	OTU2916	0	2	1	0	1	1	0	0	1	1	2	0	9
d__Bacteria	k__norank_d__Bacteria	p__Proteobacteria	c__Alphaproteobacteria	o__Rhizobiales	f__unclassified_o__Rhizobiales	g__unclassified_o__Rhizobiales	s__unclassified_o__Rhizobiales	OTU4762	1	0	0	0	0	1	0	0	0	0	0	0	2
d__Bacteria	k__norank_d__Bacteria	p__Chloroflexi	c__Chloroflexia	o__Chloroflexales	f__Roseiflexaceae	g__norank_f__Roseiflexaceae	s__uncultured_bacterium_g__norank_f__Roseiflexaceae	OTU2195	2	0	1	4	2	2	2	0	2	0	1	0	16
d__Bacteria	k__norank_d__Bacteria	p__unclassified_k__norank_d__Bacteria	c__unclassified_k__norank_d__Bacteria	o__unclassified_k__norank_d__Bacteria	f__unclassified_k__norank_d__Bacteria	g__unclassified_k__norank_d__Bacteria	s__unclassified_k__norank_d__Bacteria	OTU1336	0	0	0	2	0	2	0	0	1	1	1	0	7
d__Bacteria	k__norank_d__Bacteria	p__SAR324_cladeMarine_group_B	c__norank_p__SAR324_cladeMarine_group_B	o__norank_c__norank_p__SAR324_cladeMarine_group_B	f__norank_o__norank_c__norank_p__SAR324_cladeMarine_group_B	g__norank_f__norank_o__norank_c__norank_p__SAR324_cladeMarine_group_B	s__uncultured_soil_bacterium_g__norank_f__norank_o__norank_c__norank_p__SAR324_cladeMarine_group_B	OTU3653	2	0	2	0	0	1	3	2	2	3	4	2	21
d__Bacteria	k__norank_d__Bacteria	p__Planctomycetota	c__Planctomycetes	o__Gemmatales	f__Gemmataceae	g__norank_f__Gemmataceae	s__uncultured_bacterium_g__norank_f__Gemmataceae	OTU163	0	1	0	0	0	0	0	0	0	1	1	0	3
d__Bacteria	k__norank_d__Bacteria	p__Chloroflexi	c__OLB14	o__norank_c__OLB14	f__norank_o__norank_c__OLB14	g__norank_f__norank_o__norank_c__OLB14	s__uncultured_bacterium_g__norank_f__norank_o__norank_c__OLB14	OTU2640	2	4	3	4	2	7	7	4	5	4	4	5	51
d__Bacteria	k__norank_d__Bacteria	p__Firmicutes	c__Bacilli	o__Thermoactinomycetales	f__Thermoactinomycetaceae	g__Planifilum	s__Planifilum_composti	OTU4876	85	97	89	104	126	105	68	60	66	104	72	90	1066
d__Bacteria	k__norank_d__Bacteria	p__Proteobacteria	c__Alphaproteobacteria	o__unclassified_c__Alphaproteobacteria	f__unclassified_c__Alphaproteobacteria	g__unclassified_c__Alphaproteobacteria	s__unclassified_c__Alphaproteobacteria	OTU4539	0	0	0	0	0	0	0	2	0	0	0	0	2
d__Bacteria	k__norank_d__Bacteria	p__Chloroflexi	c__Anaerolineae	o__Ardenticatenales	f__norank_o__Ardenticatenales	g__norank_f__norank_o__Ardenticatenales	s__unclassified_g__norank_f__norank_o__Ardenticatenales	OTU4838	0	0	0	0	0	0	0	2	1	1	2	0	6
d__Bacteria	k__norank_d__Bacteria	p__Acidobacteriota	c__Holophagae	o__Subgroup_7	f__norank_o__Subgroup_7	g__norank_f__norank_o__Subgroup_7	s__unclassified_g__norank_f__norank_o__Subgroup_7	OTU4819	0	1	0	0	0	0	0	1	0	0	0	0	2
d__Bacteria	k__norank_d__Bacteria	p__Myxococcota	c__Myxococcia	o__Myxococcales	f__Myxococcaceae	g__norank_f__Myxococcaceae	s__uncultured_bacterium_g__norank_f__Myxococcaceae	OTU3020	1	6	4	5	4	1	2	2	1	4	6	7	43
d__Bacteria	k__norank_d__Bacteria	p__Proteobacteria	c__Alphaproteobacteria	o__norank_c__Alphaproteobacteria	f__norank_o__norank_c__Alphaproteobacteria	g__norank_f__norank_o__norank_c__Alphaproteobacteria	s__uncultured_Stella_sp._g__norank_f__norank	OTU125	50	73	62	57	65	72	47	41	44	59	51	62	683
d__Bacteria	k__norank_d__Bacteria	p__Bdellovibrionota	c__Bdellovibrionia	o__Bdellovibrionales	f__Bdellovibrionaceae	g__OM27_clade	s__unclassified_g__OM27_clade	OTU4927	0	0	0	0	0	0	1	0	2	0	0	0	3
d__Bacteria	k__norank_d__Bacteria	p__Myxococcota	c__Polyangia	o__Polyangiales	f__BIrii41	g__norank_f__BIrii41	s__uncultured_bacterium_g__norank_f__BIrii41	OTU2881	9	16	6	4	11	16	6	3	7	20	14	14	126
d__Bacteria	k__norank_d__Bacteria	p__Planctomycetota	c__Phycisphaerae	o__Phycisphaerales	f__Phycisphaeraceae	g__SM1A02	s__unclassified_g__SM1A02	OTU4954	0	0	0	0	0	0	0	0	0	3	1	0	4
d__Bacteria	k__norank_d__Bacteria	p__Myxococcota	c__Myxococcia	o__Myxococcales	f__Myxococcaceae	g__KD3-10	s__metagenome_g__KD3-10	OTU5375	1	1	0	0	0	0	0	0	1	0	1	0	4
d__Bacteria	k__norank_d__Bacteria	p__Proteobacteria	c__Alphaproteobacteria	o__unclassified_c__Alphaproteobacteria	f__unclassified_c__Alphaproteobacteria	g__unclassified_c__Alphaproteobacteria	s__unclassified_c__Alphaproteobacteria	OTU1160	5	6	3	1	1	0	5	7	11	9	4	5	57
d__Bacteria	k__norank_d__Bacteria	p__Planctomycetota	c__Planctomycetes	o__Pirellulales	f__Pirellulaceae	g__unclassified_f__Pirellulaceae	s__unclassified_f__Pirellulaceae	OTU1816	8	7	11	8	2	5	6	10	1	2	6	4	70
d__Bacteria	k__norank_d__Bacteria	p__Bacteroidota	c__Bacteroidia	o__Flavobacteriales	f__Cryomorphaceae	g__norank_f__Cryomorphaceae	s__unclassified_g__norank_f__Cryomorphaceae	OTU2446	2	0	0	0	1	0	1	1	0	0	2	0	7
d__Bacteria	k__norank_d__Bacteria	p__Patescibacteria	c__Microgenomatia	o__Candidatus_Woesebacteria	f__norank_o__Candidatus_Woesebacteria	g__norank_f__norank_o__Candidatus_Woesebacteria	s__unclassified_g__norank_f__norank_o__Candidatus_Woesebacteria	OTU4581	0	0	1	0	0	0	0	0	0	0	0	1	2
d__Bacteria	k__norank_d__Bacteria	p__Planctomycetota	c__OM190	o__norank_c__OM190	f__norank_o__norank_c__OM190	g__norank_f__norank_o__norank_c__OM190	s__uncultured_bacterium_g__norank_f__norank_o__norank_c__OM190	OTU4009	8	6	10	13	12	5	4	11	8	3	4	7	91
d__Bacteria	k__norank_d__Bacteria	p__Firmicutes	c__Bacilli	o__Paenibacillales	f__Paenibacillaceae	g__Paenibacillus	s__unclassified_g__Paenibacillus	OTU5425	0	0	0	2	1	1	1	1	2	3	1	1	13
d__Bacteria	k__norank_d__Bacteria	p__Firmicutes	c__Clostridia	o__Peptostreptococcales-Tissierellales	f__norank_o__Peptostreptococcales-Tissierellales	g__Tissierella	s__uncultured_bacterium_g__Tissierella	OTU2402	0	0	0	0	0	0	0	0	0	1	0	1	2
d__Bacteria	k__norank_d__Bacteria	p__Gemmatimonadota	c__Longimicrobia	o__Longimicrobiales	f__Longimicrobiaceae	g__Longimicrobium	s__uncultured_bacterium_g__Longimicrobium	OTU4911	0	0	0	1	0	0	0	3	1	0	0	0	5
d__Bacteria	k__norank_d__Bacteria	p__Verrucomicrobiota	c__Verrucomicrobiae	o__Pedosphaerales	f__Pedosphaeraceae	g__norank_f__Pedosphaeraceae	s__uncultured_bacterium_g__norank_f__Pedosphaeraceae	OTU4482	0	1	0	1	0	0	0	2	1	0	0	0	5
d__Bacteria	k__norank_d__Bacteria	p__Verrucomicrobiota	c__Verrucomicrobiae	o__Verrucomicrobiales	f__Rubritaleaceae	g__unclassified_f__Rubritaleaceae	s__unclassified_f__Rubritaleaceae	OTU3768	4	2	0	2	6	2	6	6	4	3	5	6	46
d__Bacteria	k__norank_d__Bacteria	p__Methylomirabilota	c__Methylomirabilia	o__Rokubacteriales	f__WX65	g__norank_f__WX65	s__uncultured_bacterium_g__norank_f__WX65	OTU4428	8	9	6	8	7	5	16	9	13	11	11	6	109
d__Bacteria	k__norank_d__Bacteria	p__Bacteroidota	c__Bacteroidia	o__Chitinophagales	f__Chitinophagaceae	g__Taibaiella	s__Taibaiella_sp.	OTU644	3	1	3	1	2	1	0	3	0	1	1	0	16
d__Bacteria	k__norank_d__Bacteria	p__Proteobacteria	c__Alphaproteobacteria	o__Rhizobiales	f__Beijerinckiaceae	g__Microvirga	s__uncultured_bacterium_g__Microvirga	OTU571	1	4	4	3	2	2	3	5	2	7	3	0	36
d__Bacteria	k__norank_d__Bacteria	p__Bacteroidota	c__Bacteroidia	o__Sphingobacteriales	f__Sphingobacteriaceae	g__Solitalea	s__Solitalea_canadensis	OTU4153	4	5	6	3	3	3	13	3	8	2	3	4	57
d__Bacteria	k__norank_d__Bacteria	p__Firmicutes	c__Bacilli	o__Paenibacillales	f__Paenibacillaceae	g__Paenibacillus	s__unclassified_g__Paenibacillus	OTU5157	0	0	0	1	0	0	0	0	0	1	0	0	2
d__Bacteria	k__norank_d__Bacteria	p__Firmicutes	c__Limnochordia	o__norank_c__Limnochordia	f__norank_o__norank_c__Limnochordia	g__Hydrogenispora	s__uncultured_bacterium_g__Hydrogenispora	OTU775	1	1	2	0	0	0	0	1	1	1	0	0	7
d__Bacteria	k__norank_d__Bacteria	p__Bacteroidota	c__Bacteroidia	o__Cytophagales	f__Microscillaceae	g__norank_f__Microscillaceae	s__uncultured_soil_bacterium_g__norank_f__Microscillaceae	OTU857	9	11	5	10	6	8	17	8	8	14	23	19	138
d__Bacteria	k__norank_d__Bacteria	p__Gemmatimonadota	c__Gemmatimonadetes	o__Gemmatimonadales	f__Gemmatimonadaceae	g__Gemmatimonas	s__uncultured_Gemmatimonadetes_bacterium_g__Gemmatimonas	OTU2577	0	0	0	0	0	1	0	0	0	0	0	0	1
d__Bacteria	k__norank_d__Bacteria	p__Bdellovibrionota	c__Oligoflexia	o__0319-6G20	f__norank_o__0319-6G20	g__norank_f__norank_o__0319-6G20	s__unclassified_g__norank_f__norank_o__0319-6G20	OTU2596	1	3	0	0	2	0	0	4	1	3	2	2	18
d__Bacteria	k__norank_d__Bacteria	p__Planctomycetota	c__Planctomycetes	o__Pirellulales	f__Pirellulaceae	g__Pirellula	s__metagenome_g__Pirellula	OTU1771	3	3	6	1	3	1	3	2	0	5	2	2	31
d__Bacteria	k__norank_d__Bacteria	p__Planctomycetota	c__Planctomycetes	o__norank_c__Planctomycetes	f__norank_o__norank_c__Planctomycetes	g__norank_f__norank_o__norank_c__Planctomycetes	s__unclassified_g__norank_f__norank_o__norank_c__Planctomycetes	OTU625	5	1	2	1	3	0	1	0	4	0	2	0	19
d__Bacteria	k__norank_d__Bacteria	p__Chloroflexi	c__Anaerolineae	o__SBR1031	f__norank_o__SBR1031	g__norank_f__norank_o__SBR1031	s__uncultured_Gemmatimonadetes_bacterium_g__norank_f__norank	OTU4660	0	0	0	0	0	0	0	1	1	0	0	0	2
d__Bacteria	k__norank_d__Bacteria	p__Acidobacteriota	c__unclassified_p__Acidobacteriota	o__unclassified_p__Acidobacteriota	f__unclassified_p__Acidobacteriota	g__unclassified_p__Acidobacteriota	s__unclassified_p__Acidobacteriota	OTU1366	3	3	2	0	0	0	0	7	2	0	0	1	18
d__Bacteria	k__norank_d__Bacteria	p__Proteobacteria	c__Alphaproteobacteria	o__Elsterales	f__norank_o__Elsterales	g__norank_f__norank_o__Elsterales	s__unclassified_g__norank_f__norank_o__Elsterales	OTU1287	1	3	4	0	4	1	1	2	7	1	1	1	26
d__Bacteria	k__norank_d__Bacteria	p__Patescibacteria	c__Microgenomatia	o__Candidatus_Woesebacteria	f__norank_o__Candidatus_Woesebacteria	g__norank_f__norank_o__Candidatus_Woesebacteria	s__unclassified_g__norank_f__norank_o__Candidatus_Woesebacteria	OTU289	0	1	1	0	0	1	0	0	1	0	0	0	4
d__Bacteria	k__norank_d__Bacteria	p__Firmicutes	c__Desulfotomaculia	o__Desulfotomaculales	f__unclassified_o__Desulfotomaculales	g__unclassified_o__Desulfotomaculales	s__unclassified_o__Desulfotomaculales	OTU2193	0	1	0	1	0	1	0	1	1	1	3	0	9
d__Bacteria	k__norank_d__Bacteria	p__Firmicutes	c__Clostridia	o__Peptostreptococcales-Tissierellales	f__Sedimentibacteraceae	g__Sedimentibacter	s__uncultured_bacterium_g__Sedimentibacter	OTU1644	0	3	2	1	1	1	0	0	1	2	0	0	11
d__Bacteria	k__norank_d__Bacteria	p__Elusimicrobiota	c__Elusimicrobia	o__MVP-88	f__norank_o__MVP-88	g__norank_f__norank_o__MVP-88	s__uncultured_bacterium_g__norank_f__norank_o__MVP-88	OTU4062	1	0	0	0	0	1	3	0	3	0	0	0	8
d__Bacteria	k__norank_d__Bacteria	p__Bacteroidota	c__Bacteroidia	o__Chitinophagales	f__Chitinophagaceae	g__Edaphobaculum	s__uncultured_bacterium_g__Edaphobaculum	OTU1800	0	0	3	0	1	0	0	0	0	0	0	0	4
d__Bacteria	k__norank_d__Bacteria	p__Planctomycetota	c__Planctomycetes	o__Planctomycetales	f__norank_o__Planctomycetales	g__norank_f__norank_o__Planctomycetales	s__uncultured_bacterium_g__norank_f__norank_o__Planctomycetales	OTU2500	0	3	1	0	1	1	0	0	0	1	0	0	7
d__Bacteria	k__norank_d__Bacteria	p__Patescibacteria	c__Microgenomatia	o__norank_c__Microgenomatia	f__norank_o__norank_c__Microgenomatia	g__norank_f__norank_o__norank_c__Microgenomatia	s__uncultured_candidate_division_WS6_bacterium_g__norank_f__norank_o__norank	OTU3154	1	0	1	0	0	0	0	0	0	2	0	0	4
d__Bacteria	k__norank_d__Bacteria	p__Proteobacteria	c__Alphaproteobacteria	o__Sphingomonadales	f__Sphingomonadaceae	g__Novosphingobium	s__metagenome_g__Novosphingobium	OTU1837	39	49	42	48	51	57	11	9	17	21	17	21	382
d__Bacteria	k__norank_d__Bacteria	p__Latescibacterota	c__norank_p__Latescibacterota	o__norank_c__norank_p__Latescibacterota	f__norank_o__norank_c__norank_p__Latescibacterota	g__norank_f__norank_o__norank_c__norank_p__Latescibacterota	s__unclassified_g__norank_f__norank_o__norank_c__norank_p__Latescibacterota	OTU698	1	4	3	1	1	2	1	1	3	2	0	1	20
d__Bacteria	k__norank_d__Bacteria	p__Bdellovibrionota	c__Bdellovibrionia	o__Bdellovibrionales	f__Bdellovibrionaceae	g__Bdellovibrio	s__uncultured_deep-sea_bacterium_g__Bdellovibrio	OTU3208	1	0	0	0	0	1	0	0	0	0	0	0	2
d__Bacteria	k__norank_d__Bacteria	p__Actinobacteriota	c__Actinobacteria	o__Streptomycetales	f__Streptomycetaceae	g__Streptomyces	s__Streptomyces_specialis	OTU2477	2	3	0	0	2	2	1	0	5	2	0	3	20
d__Bacteria	k__norank_d__Bacteria	p__Patescibacteria	c__Saccharimonadia	o__Saccharimonadales	f__unclassified_o__Saccharimonadales	g__unclassified_o__Saccharimonadales	s__unclassified_o__Saccharimonadales	OTU4710	2	0	2	0	1	0	2	2	1	3	0	0	13
d__Bacteria	k__norank_d__Bacteria	p__Actinobacteriota	c__Actinobacteria	o__Streptosporangiales	f__Thermomonosporaceae	g__Actinomadura	s__Actinomadura_rubrobrunea	OTU1941	1	4	5	3	2	7	3	3	3	2	2	4	39
d__Bacteria	k__norank_d__Bacteria	p__Proteobacteria	c__Gammaproteobacteria	o__Burkholderiales	f__Nitrosomonadaceae	g__MND1	s__unclassified_g__MND1	OTU1425	1	3	3	2	1	3	1	7	2	3	3	8	37
d__Bacteria	k__norank_d__Bacteria	p__Bacteroidota	c__Bacteroidia	o__Chitinophagales	f__unclassified_o__Chitinophagales	g__unclassified_o__Chitinophagales	s__unclassified_o__Chitinophagales	OTU4971	0	0	0	0	0	0	0	0	0	2	1	1	4
d__Bacteria	k__norank_d__Bacteria	p__Planctomycetota	c__Planctomycetes	o__Pirellulales	f__Pirellulaceae	g__norank_f__Pirellulaceae	s__uncultured_bacterium_g__norank_f__Pirellulaceae	OTU1973	5	2	4	7	8	1	6	6	3	2	1	6	51
d__Bacteria	k__norank_d__Bacteria	p__Bdellovibrionota	c__Bdellovibrionia	o__Bacteriovoracales	f__Bacteriovoracaceae	g__Peredibacter	s__unclassified_g__Peredibacter	OTU4229	14	6	10	14	12	6	12	6	6	13	8	11	118
d__Bacteria	k__norank_d__Bacteria	p__Patescibacteria	c__Saccharimonadia	o__Saccharimonadales	f__Saccharimonadaceae	g__TM7a	s__uncultured_bacterium_g__TM7a	OTU62	3	1	0	3	4	6	0	0	0	1	0	0	18
d__Bacteria	k__norank_d__Bacteria	p__Hydrogenedentes	c__Hydrogenedentia	o__Hydrogenedentiales	f__Hydrogenedensaceae	g__norank_f__Hydrogenedensaceae	s__uncultured_bacterium_g__norank_f__Hydrogenedensaceae	OTU3874	2	3	0	1	2	1	1	3	3	1	1	0	18
d__Bacteria	k__norank_d__Bacteria	p__Proteobacteria	c__Gammaproteobacteria	o__Diplorickettsiales	f__Diplorickettsiaceae	g__Aquicella	s__unclassified_g__Aquicella	OTU1106	8	10	8	3	7	7	6	8	6	9	13	3	88
d__Bacteria	k__norank_d__Bacteria	p__Planctomycetota	c__Planctomycetes	o__Gemmatales	f__Gemmataceae	g__norank_f__Gemmataceae	s__uncultured_bacterium_g__norank_f__Gemmataceae	OTU4764	5	4	7	9	4	7	2	7	2	1	6	5	59
d__Bacteria	k__norank_d__Bacteria	p__Actinobacteriota	c__Thermoleophilia	o__Gaiellales	f__Gaiellaceae	g__Gaiella	s__uncultured_actinobacterium_g__Gaiella	OTU792	1	6	5	4	4	2	6	6	6	7	4	5	56
d__Bacteria	k__norank_d__Bacteria	p__Bacteroidota	c__Bacteroidia	o__Sphingobacteriales	f__env.OPS_17	g__norank_f__env.OPS_17	s__uncultured_Bacteroidetes_bacterium_g__norank_f__env.OPS_17	OTU3767	2	2	1	1	1	0	2	0	0	0	1	0	10
d__Bacteria	k__norank_d__Bacteria	p__Myxococcota	c__Polyangia	o__Polyangiales	f__Polyangiaceae	g__Pajaroellobacter	s__uncultured_delta_proteobacterium_g__Pajaroellobacter	OTU1691	7	5	5	10	3	2	5	7	5	12	2	6	69
d__Bacteria	k__norank_d__Bacteria	p__Firmicutes	c__Bacilli	o__Lactobacillales	f__Enterococcaceae	g__Enterococcus	s__Enterococcus_faecium_g__Enterococcus	OTU2982	0	0	0	0	2	0	2	0	0	1	0	0	5
d__Bacteria	k__norank_d__Bacteria	p__Planctomycetota	c__Planctomycetes	o__Gemmatales	f__Gemmataceae	g__norank_f__Gemmataceae	s__unclassified_g__norank_f__Gemmataceae	OTU916	5	2	2	2	1	3	3	3	2	0	0	1	24
d__Bacteria	k__norank_d__Bacteria	p__unclassified_k__norank_d__Bacteria	c__unclassified_k__norank_d__Bacteria	o__unclassified_k__norank_d__Bacteria	f__unclassified_k__norank_d__Bacteria	g__unclassified_k__norank_d__Bacteria	s__unclassified_k__norank_d__Bacteria	OTU4965	0	0	0	1	0	0	0	0	0	1	0	0	2
d__Bacteria	k__norank_d__Bacteria	p__Actinobacteriota	c__Actinobacteria	o__Propionibacteriales	f__Nocardioidaceae	g__unclassified_f__Nocardioidaceae	s__unclassified_f__Nocardioidaceae	OTU1234	0	1	2	4	3	2	1	3	4	5	7	3	35
d__Bacteria	k__norank_d__Bacteria	p__Firmicutes	c__Clostridia	o__Peptostreptococcales-Tissierellales	f__Peptostreptococcaceae	g__Terrisporobacter	s__uncultured_bacterium_g__Terrisporobacter	OTU562	1	3	2	4	1	1	1	1	0	1	1	1	17
d__Bacteria	k__norank_d__Bacteria	p__Actinobacteriota	c__Actinobacteria	o__Micromonosporales	f__Micromonosporaceae	g__unclassified_f__Micromonosporaceae	s__unclassified_f__Micromonosporaceae	OTU1278	1	21	2	1	3	4	2	0	1	1	1	1	38
d__Bacteria	k__norank_d__Bacteria	p__Acidobacteriota	c__Vicinamibacteria	o__Vicinamibacterales	f__norank_o__Vicinamibacterales	g__norank_f__norank_o__Vicinamibacterales	s__unclassified_g__norank_f__norank_o__Vicinamibacterales	OTU1128	18	8	17	21	11	10	32	22	27	7	24	15	212
d__Bacteria	k__norank_d__Bacteria	p__Firmicutes	c__Clostridia	o__Caldicoprobacterales	f__Caldicoprobacteraceae	g__Caldicoprobacter	s__uncultured_bacterium_g__Caldicoprobacter	OTU3256	1	0	0	0	0	0	1	1	0	0	1	1	5
d__Bacteria	k__norank_d__Bacteria	p__Actinobacteriota	c__Acidimicrobiia	o__Microtrichales	f__norank_o__Microtrichales	g__norank_f__norank_o__Microtrichales	s__wastewater_metagenome_g__norank_f__norank_o__Microtrichales	OTU4746	2	2	2	0	3	1	4	1	0	2	1	3	21
d__Bacteria	k__norank_d__Bacteria	p__Chloroflexi	c__Chloroflexia	o__Thermomicrobiales	f__JG30-KF-CM45	g__norank_f__JG30-KF-CM45	s__uncultured_bacterium_g__norank_f__JG30-KF-CM45	OTU1734	2	5	6	4	0	3	0	0	2	1	2	0	25
d__Bacteria	k__norank_d__Bacteria	p__Planctomycetota	c__Phycisphaerae	o__Tepidisphaerales	f__WD2101_soil_group	g__norank_f__WD2101_soil_group	s__uncultured_bacterium_g__norank_f__WD2101_soil_group	OTU2870	0	0	1	0	0	0	0	0	0	0	0	0	1
d__Bacteria	k__norank_d__Bacteria	p__Gemmatimonadota	c__unclassified_p__Gemmatimonadota	o__unclassified_p__Gemmatimonadota	f__unclassified_p__Gemmatimonadota	g__unclassified_p__Gemmatimonadota	s__unclassified_p__Gemmatimonadota	OTU4131	0	3	6	2	2	2	9	4	4	5	2	5	44
d__Bacteria	k__norank_d__Bacteria	p__Actinobacteriota	c__Acidimicrobiia	o__unclassified_c__Acidimicrobiia	f__unclassified_c__Acidimicrobiia	g__unclassified_c__Acidimicrobiia	s__unclassified_c__Acidimicrobiia	OTU251	2	3	2	3	10	2	2	6	5	5	2	2	44
d__Bacteria	k__norank_d__Bacteria	p__Gemmatimonadota	c__S0134_terrestrial_group	o__norank_c__S0134_terrestrial_group	f__norank_o__norank_c__S0134_terrestrial_group	g__norank_f__norank_o__norank_c__S0134_terrestrial_group	s__unclassified_g__norank_f__norank_o__norank_c__S0134_terrestrial_group	OTU2685	12	22	17	15	18	17	36	27	27	33	25	30	279
d__Bacteria	k__norank_d__Bacteria	p__Actinobacteriota	c__Thermoleophilia	o__Gaiellales	f__norank_o__Gaiellales	g__norank_f__norank_o__Gaiellales	s__unclassified_g__norank_f__norank_o__Gaiellales	OTU1682	2	4	2	3	3	1	3	3	5	0	2	0	28
d__Bacteria	k__norank_d__Bacteria	p__Patescibacteria	c__Saccharimonadia	o__Saccharimonadales	f__norank_o__Saccharimonadales	g__norank_f__norank_o__Saccharimonadales	s__unclassified_g__norank_f__norank_o__Saccharimonadales	OTU4691	0	0	1	0	1	0	3	1	1	1	1	1	10
d__Bacteria	k__norank_d__Bacteria	p__Actinobacteriota	c__MB-A2-108	o__norank_c__MB-A2-108	f__norank_o__norank_c__MB-A2-108	g__norank_f__norank_o__norank_c__MB-A2-108	s__unclassified_g__norank_f__norank_o__norank_c__MB-A2-108	OTU2663	19	11	15	22	12	12	6	24	18	5	11	18	173
d__Bacteria	k__norank_d__Bacteria	p__Firmicutes	c__Bacilli	o__Alicyclobacillales	f__Alicyclobacillaceae	g__Alicyclobacillus	s__unclassified_g__Alicyclobacillus	OTU3153	0	0	0	0	0	1	1	0	0	0	2	2	6
d__Bacteria	k__norank_d__Bacteria	p__Gemmatimonadota	c__S0134_terrestrial_group	o__norank_c__S0134_terrestrial_group	f__norank_o__norank_c__S0134_terrestrial_group	g__norank_f__norank_o__norank_c__S0134_terrestrial_group	s__unclassified_g__norank_f__norank_o__norank_c__S0134_terrestrial_group	OTU3840	4	0	2	1	1	2	9	17	29	12	5	31	113
d__Bacteria	k__norank_d__Bacteria	p__Firmicutes	c__Bacilli	o__Thermoactinomycetales	f__Thermoactinomycetaceae	g__norank_f__Thermoactinomycetaceae	s__uncultured_bacterium_g__norank_f__Thermoactinomycetaceae	OTU1090	0	1	2	0	0	0	0	1	0	0	1	0	5
d__Bacteria	k__norank_d__Bacteria	p__Actinobacteriota	c__Actinobacteria	o__Frankiales	f__Geodermatophilaceae	g__Modestobacter	s__uncultured_bacterium_g__Modestobacter	OTU5006	5	10	6	9	13	15	18	9	17	11	7	11	131
d__Bacteria	k__norank_d__Bacteria	p__Bdellovibrionota	c__Oligoflexia	o__Silvanigrellales	f__Silvanigrellaceae	g__unclassified_f__Silvanigrellaceae	s__unclassified_f__Silvanigrellaceae	OTU1984	0	0	0	2	0	0	0	1	0	0	0	0	3
d__Bacteria	k__norank_d__Bacteria	p__Firmicutes	c__Bacilli	o__Paenibacillales	f__Paenibacillaceae	g__Paenibacillus	s__Paenibacillus_sp._32O-W	OTU2020	0	0	0	0	2	0	0	0	0	0	0	0	2
d__Bacteria	k__norank_d__Bacteria	p__Proteobacteria	c__Gammaproteobacteria	o__Burkholderiales	f__Burkholderiaceae	g__Limnobacter	s__unclassified_g__Limnobacter	OTU1548	2	8	4	8	3	10	2	8	6	3	7	5	66
d__Bacteria	k__norank_d__Bacteria	p__Firmicutes	c__Thermovenabulia	o__Thermovenabulales	f__norank_o__Thermovenabulales	g__Thermosediminibacter	s__Thermosediminibacter_oceani_DSM_16646	OTU1098	0	0	1	0	0	0	1	2	0	1	0	0	5
d__Bacteria	k__norank_d__Bacteria	p__Patescibacteria	c__Saccharimonadia	o__Saccharimonadales	f__norank_o__Saccharimonadales	g__norank_f__norank_o__Saccharimonadales	s__unclassified_g__norank_f__norank_o__Saccharimonadales	OTU5362	0	0	0	0	0	0	0	1	0	0	1	0	2
d__Bacteria	k__norank_d__Bacteria	p__Chloroflexi	c__Anaerolineae	o__Anaerolineales	f__Anaerolineaceae	g__norank_f__Anaerolineaceae	s__uncultured_Chloroflexi_bacterium_g__norank_f__Anaerolineaceae	OTU396	0	1	4	0	1	0	0	0	0	0	1	0	7
d__Bacteria	k__norank_d__Bacteria	p__Verrucomicrobiota	c__Chlamydiae	o__Chlamydiales	f__Parachlamydiaceae	g__Neochlamydia	s__unclassified_g__Neochlamydia	OTU1023	1	0	1	0	0	0	0	1	0	0	0	0	3
d__Bacteria	k__norank_d__Bacteria	p__Planctomycetota	c__Planctomycetes	o__Gemmatales	f__Gemmataceae	g__Fimbriiglobus	s__uncultured_bacterium_g__Fimbriiglobus	OTU2072	0	0	0	1	0	0	0	2	0	0	0	0	3
d__Bacteria	k__norank_d__Bacteria	p__Myxococcota	c__Polyangia	o__Polyangiales	f__Sandaracinaceae	g__norank_f__Sandaracinaceae	s__uncultured_bacterium_g__norank_f__Sandaracinaceae	OTU1405	2	3	1	3	3	2	2	1	2	3	0	2	24
d__Bacteria	k__norank_d__Bacteria	p__Planctomycetota	c__Planctomycetes	o__Gemmatales	f__Gemmataceae	g__norank_f__Gemmataceae	s__metagenome_g__norank_f__Gemmataceae	OTU2101	1	3	0	1	0	1	1	4	2	1	5	3	22
d__Bacteria	k__norank_d__Bacteria	p__Actinobacteriota	c__Acidimicrobiia	o__Microtrichales	f__unclassified_o__Microtrichales	g__unclassified_o__Microtrichales	s__unclassified_o__Microtrichales	OTU355	3	1	0	0	0	0	0	0	0	1	1	1	7
d__Bacteria	k__norank_d__Bacteria	p__Firmicutes	c__Bacilli	o__Thermoactinomycetales	f__Thermoactinomycetaceae	g__norank_f__Thermoactinomycetaceae	s__uncultured_bacterium_g__norank_f__Thermoactinomycetaceae	OTU2186	0	0	0	1	1	0	1	0	0	0	0	0	3
d__Bacteria	k__norank_d__Bacteria	p__Proteobacteria	c__Gammaproteobacteria	o__Legionellales	f__Legionellaceae	g__Legionella	s__unclassified_g__Legionella	OTU2220	2	2	0	2	2	1	1	4	0	0	2	0	16
d__Bacteria	k__norank_d__Bacteria	p__Chloroflexi	c__unclassified_p__Chloroflexi	o__unclassified_p__Chloroflexi	f__unclassified_p__Chloroflexi	g__unclassified_p__Chloroflexi	s__unclassified_p__Chloroflexi	OTU4921	1	1	2	1	3	1	0	1	2	0	1	1	14
d__Bacteria	k__norank_d__Bacteria	p__Planctomycetota	c__Phycisphaerae	o__Tepidisphaerales	f__WD2101_soil_group	g__norank_f__WD2101_soil_group	s__uncultured_bacterium_g__norank_f__WD2101_soil_group	OTU2677	0	4	1	4	6	0	5	4	4	3	8	9	48
d__Bacteria	k__norank_d__Bacteria	p__Chloroflexi	c__OLB14	o__norank_c__OLB14	f__norank_o__norank_c__OLB14	g__norank_f__norank_o__norank_c__OLB14	s__unclassified_g__norank_f__norank_o__norank_c__OLB14	OTU5546	50	62	69	57	42	59	66	63	59	59	60	42	688
d__Bacteria	k__norank_d__Bacteria	p__Proteobacteria	c__Gammaproteobacteria	o__CCD24	f__norank_o__CCD24	g__norank_f__norank_o__CCD24	s__uncultured_bacterium_g__norank_f__norank_o__CCD24	OTU4845	100	128	133	126	103	95	146	81	117	174	141	115	1459
d__Bacteria	k__norank_d__Bacteria	p__Firmicutes	c__Bacilli	o__Bacillales	f__Bacillaceae	g__Bacillus	s__unclassified_g__Bacillus	OTU1659	24	23	23	23	15	24	35	30	35	38	40	22	332
d__Bacteria	k__norank_d__Bacteria	p__Planctomycetota	c__Planctomycetes	o__Gemmatales	f__Gemmataceae	g__Gemmata	s__uncultured_bacterium_g__Gemmata	OTU4017	2	1	2	0	2	1	1	0	4	0	0	1	14
d__Bacteria	k__norank_d__Bacteria	p__Chloroflexi	c__JG30-KF-CM66	o__norank_c__JG30-KF-CM66	f__norank_o__norank_c__JG30-KF-CM66	g__norank_f__norank_o__norank_c__JG30-KF-CM66	s__unclassified_g__norank_f__norank_o__norank_c__JG30-KF-CM66	OTU5406	0	1	0	0	0	0	0	1	1	0	2	0	5
d__Bacteria	k__norank_d__Bacteria	p__Firmicutes	c__Bacilli	o__Paenibacillales	f__Paenibacillaceae	g__Paenibacillus	s__unclassified_g__Paenibacillus	OTU5363	2	0	0	1	0	2	0	3	1	1	4	2	16
d__Bacteria	k__norank_d__Bacteria	p__Chloroflexi	c__P2-11E	o__norank_c__P2-11E	f__norank_o__norank_c__P2-11E	g__norank_f__norank_o__norank_c__P2-11E	s__uncultured_bacterium_g__norank_f__norank_o__norank_c__P2-11E	OTU1331	0	0	1	0	0	1	0	0	0	0	0	1	3
d__Bacteria	k__norank_d__Bacteria	p__Actinobacteriota	c__Thermoleophilia	o__Gaiellales	f__norank_o__Gaiellales	g__norank_f__norank_o__Gaiellales	s__uncultured_bacterium_g__norank_f__norank_o__Gaiellales	OTU3520	2	0	2	0	2	0	1	0	1	0	0	1	9
d__Bacteria	k__norank_d__Bacteria	p__Actinobacteriota	c__Actinobacteria	o__Streptomycetales	f__Streptomycetaceae	g__Streptomyces	s__unclassified_g__Streptomyces	OTU5124	1	0	0	0	0	1	1	2	2	1	0	3	11
d__Bacteria	k__norank_d__Bacteria	p__Planctomycetota	c__Phycisphaerae	o__Phycisphaerales	f__Phycisphaeraceae	g__AKYG587	s__uncultured_bacterium_g__AKYG587	OTU1952	0	1	1	1	0	0	0	0	2	4	1	1	11
d__Bacteria	k__norank_d__Bacteria	p__Acidobacteriota	c__Vicinamibacteria	o__Subgroup_17	f__norank_o__Subgroup_17	g__norank_f__norank_o__Subgroup_17	s__unclassified_g__norank_f__norank_o__Subgroup_17	OTU18	44	55	62	34	43	18	53	67	51	13	26	43	509
d__Bacteria	k__norank_d__Bacteria	p__Actinobacteriota	c__Acidimicrobiia	o__IMCC26256	f__norank_o__IMCC26256	g__norank_f__norank_o__IMCC26256	s__unclassified_g__norank_f__norank_o__IMCC26256	OTU191	9	9	11	3	6	10	10	5	10	20	2	9	104
d__Bacteria	k__norank_d__Bacteria	p__Planctomycetota	c__Planctomycetes	o__Gemmatales	f__Gemmataceae	g__norank_f__Gemmataceae	s__unclassified_g__norank_f__Gemmataceae	OTU4119	0	0	0	1	1	0	1	1	1	0	0	0	5
d__Bacteria	k__norank_d__Bacteria	p__Firmicutes	c__Syntrophomonadia	o__Syntrophomonadales	f__Syntrophomonadaceae	g__Syntrophomonas	s__uncultured_bacterium_g__Syntrophomonas	OTU1529	0	0	1	1	0	0	0	0	0	0	1	0	3
d__Bacteria	k__norank_d__Bacteria	p__Planctomycetota	c__Planctomycetes	o__Planctomycetales	f__norank_o__Planctomycetales	g__norank_f__norank_o__Planctomycetales	s__unclassified_g__norank_f__norank_o__Planctomycetales	OTU392	0	0	0	0	0	0	0	0	0	0	0	1	1
d__Bacteria	k__norank_d__Bacteria	p__Bacteroidota	c__Bacteroidia	o__Chitinophagales	f__norank_o__Chitinophagales	g__norank_f__norank_o__Chitinophagales	s__unclassified_g__norank_f__norank_o__Chitinophagales	OTU5395	1	0	0	0	0	2	0	0	0	1	1	2	7
d__Bacteria	k__norank_d__Bacteria	p__Proteobacteria	c__Alphaproteobacteria	o__Defluviicoccales	f__unclassified_o__Defluviicoccales	g__unclassified_o__Defluviicoccales	s__unclassified_o__Defluviicoccales	OTU5522	0	0	1	0	0	0	0	0	0	0	0	1	2
d__Bacteria	k__norank_d__Bacteria	p__Chloroflexi	c__Dehalococcoidia	o__S085	f__norank_o__S085	g__norank_f__norank_o__S085	s__metagenome_g__norank_f__norank_o__S085	OTU1700	41	34	57	41	55	49	56	47	47	47	61	50	585
d__Bacteria	k__norank_d__Bacteria	p__Chloroflexi	c__Chloroflexia	o__Chloroflexales	f__Chloroflexaceae	g__Chloronema	s__Scytonema_tolypothrichoides_VB-61278_g__Chloronema	OTU3926	0	0	0	0	0	0	1	1	0	0	0	0	2
d__Bacteria	k__norank_d__Bacteria	p__Myxococcota	c__Polyangia	o__unclassified_c__Polyangia	f__unclassified_c__Polyangia	g__unclassified_c__Polyangia	s__unclassified_c__Polyangia	OTU4168	1	0	0	0	0	0	1	1	2	0	2	0	7
d__Bacteria	k__norank_d__Bacteria	p__Bdellovibrionota	c__Oligoflexia	o__0319-6G20	f__norank_o__0319-6G20	g__norank_f__norank_o__0319-6G20	s__unclassified_g__norank_f__norank_o__0319-6G20	OTU2109	0	0	0	0	0	0	0	1	0	0	0	0	1
d__Bacteria	k__norank_d__Bacteria	p__Planctomycetota	c__Planctomycetes	o__Pirellulales	f__Pirellulaceae	g__Pirellula	s__unclassified_g__Pirellula	OTU3553	30	23	17	24	24	17	20	26	21	11	23	26	262
d__Bacteria	k__norank_d__Bacteria	p__Gemmatimonadota	c__S0134_terrestrial_group	o__norank_c__S0134_terrestrial_group	f__norank_o__norank_c__S0134_terrestrial_group	g__norank_f__norank_o__norank_c__S0134_terrestrial_group	s__uncultured_bacterium_g__norank_f__norank_o__norank_c__S0134_terrestrial_group	OTU5492	0	0	0	0	0	1	2	1	0	2	0	0	6
d__Bacteria	k__norank_d__Bacteria	p__Bacteroidota	c__Bacteroidia	o__Chitinophagales	f__norank_o__Chitinophagales	g__norank_f__norank_o__Chitinophagales	s__unclassified_g__norank_f__norank_o__Chitinophagales	OTU2288	0	0	0	2	0	1	0	0	0	0	0	0	3
d__Bacteria	k__norank_d__Bacteria	p__Gemmatimonadota	c__S0134_terrestrial_group	o__norank_c__S0134_terrestrial_group	f__norank_o__norank_c__S0134_terrestrial_group	g__norank_f__norank_o__norank_c__S0134_terrestrial_group	s__uncultured_bacterium_g__norank_f__norank_o__norank_c__S0134_terrestrial_group	OTU5494	1	0	0	0	1	0	0	0	1	1	0	1	5
d__Bacteria	k__norank_d__Bacteria	p__Proteobacteria	c__Gammaproteobacteria	o__Xanthomonadales	f__Rhodanobacteraceae	g__Luteibacter	s__unclassified_g__Luteibacter	OTU1766	18	10	6	5	17	4	0	0	0	1	8	2	71
d__Bacteria	k__norank_d__Bacteria	p__Acidobacteriota	c__Subgroup_25	o__norank_c__Subgroup_25	f__norank_o__norank_c__Subgroup_25	g__norank_f__norank_o__norank_c__Subgroup_25	s__uncultured_Acidobacteria_bacterium_g__norank_f__norank_o__norank_c__Subgroup_25	OTU375	0	1	1	0	0	0	0	0	1	0	0	0	3
d__Bacteria	k__norank_d__Bacteria	p__Firmicutes	c__Clostridia	o__Peptococcales	f__Peptococcaceae	g__norank_f__Peptococcaceae	s__uncultured_bacterium_g__norank_f__Peptococcaceae	OTU1014	0	0	0	0	0	0	0	0	0	0	0	1	1
d__Bacteria	k__norank_d__Bacteria	p__Proteobacteria	c__Gammaproteobacteria	o__unclassified_c__Gammaproteobacteria	f__unclassified_c__Gammaproteobacteria	g__unclassified_c__Gammaproteobacteria	s__unclassified_c__Gammaproteobacteria	OTU2574	0	1	0	0	2	0	0	1	1	0	0	1	6
d__Bacteria	k__norank_d__Bacteria	p__Actinobacteriota	c__Acidimicrobiia	o__Microtrichales	f__norank_o__Microtrichales	g__norank_f__norank_o__Microtrichales	s__unclassified_g__norank_f__norank_o__Microtrichales	OTU9	2	0	0	1	0	0	0	0	0	0	0	0	3
d__Bacteria	k__norank_d__Bacteria	p__Elusimicrobiota	c__Elusimicrobia	o__MVP-88	f__norank_o__MVP-88	g__norank_f__norank_o__MVP-88	s__uncultured_bacterium_g__norank_f__norank_o__MVP-88	OTU3866	0	2	1	2	0	0	1	0	0	0	0	2	8
d__Bacteria	k__norank_d__Bacteria	p__Elusimicrobiota	c__Lineage_IIa	o__norank_c__Lineage_IIa	f__norank_o__norank_c__Lineage_IIa	g__norank_f__norank_o__norank_c__Lineage_IIa	s__uncultured_bacterium_g__norank_f__norank_o__norank_c__Lineage_IIa	OTU508	0	2	1	1	0	0	0	1	1	0	0	0	6
d__Bacteria	k__norank_d__Bacteria	p__Firmicutes	c__Clostridia	o__Caldicoprobacterales	f__Caldicoprobacteraceae	g__Caldicoprobacter	s__uncultured_Firmicutes_bacterium_g__Caldicoprobacter	OTU2260	0	1	1	3	0	2	0	0	0	2	1	0	10
d__Bacteria	k__norank_d__Bacteria	p__Firmicutes	c__Bacilli	o__Bacillales	f__Bacillaceae	g__Piscibacillus	s__unclassified_g__Piscibacillus	OTU3608	1	0	0	0	1	0	1	0	1	0	0	1	5
d__Bacteria	k__norank_d__Bacteria	p__Acidobacteriota	c__Acidobacteriae	o__Subgroup_15	f__norank_o__Subgroup_15	g__norank_f__norank_o__Subgroup_15	s__uncultured_bacterium_g__norank_f__norank_o__Subgroup_15	OTU3064	1	0	0	0	1	0	0	0	2	0	3	1	8
d__Bacteria	k__norank_d__Bacteria	p__Gemmatimonadota	c__Gemmatimonadetes	o__Gemmatimonadales	f__Gemmatimonadaceae	g__norank_f__Gemmatimonadaceae	s__unclassified_g__norank_f__Gemmatimonadaceae	OTU4824	0	0	0	0	0	0	0	1	0	0	1	0	2
d__Bacteria	k__norank_d__Bacteria	p__Proteobacteria	c__Gammaproteobacteria	o__Burkholderiales	f__TRA3-20	g__norank_f__TRA3-20	s__unclassified_g__norank_f__TRA3-20	OTU2710	42	49	36	39	45	38	60	50	66	55	47	55	582
d__Bacteria	k__norank_d__Bacteria	p__Firmicutes	c__Clostridia	o__Oscillospirales	f__Oscillospiraceae	g__Sporobacter	s__uncultured_bacterium_g__Sporobacter	OTU5344	0	0	0	0	0	0	1	0	0	0	2	1	4
d__Bacteria	k__norank_d__Bacteria	p__Acidobacteriota	c__Vicinamibacteria	o__Vicinamibacterales	f__norank_o__Vicinamibacterales	g__norank_f__norank_o__Vicinamibacterales	s__uncultured_bacterium_g__norank_f__norank_o__Vicinamibacterales	OTU2565	14	4	11	10	7	7	6	12	11	9	11	11	113
d__Bacteria	k__norank_d__Bacteria	p__Planctomycetota	c__Phycisphaerae	o__CCM11a	f__norank_o__CCM11a	g__norank_f__norank_o__CCM11a	s__uncultured_bacterium_g__norank_f__norank_o__CCM11a	OTU165	0	1	0	0	0	1	0	1	0	0	0	0	3
d__Bacteria	k__norank_d__Bacteria	p__Acidobacteriota	c__Vicinamibacteria	o__Vicinamibacterales	f__Vicinamibacteraceae	g__norank_f__Vicinamibacteraceae	s__unclassified_g__norank_f__Vicinamibacteraceae	OTU1811	25	30	26	23	32	20	27	36	36	13	15	19	302
d__Bacteria	k__norank_d__Bacteria	p__Chloroflexi	c__Anaerolineae	o__SBR1031	f__A4b	g__norank_f__A4b	s__uncultured_soil_bacterium_g__norank_f__A4b	OTU4666	0	1	1	0	2	2	1	1	0	1	0	0	9
d__Bacteria	k__norank_d__Bacteria	p__Chloroflexi	c__Anaerolineae	o__Ardenticatenales	f__Ardenticatenaceae	g__norank_f__Ardenticatenaceae	s__uncultured_bacterium_g__norank_f__Ardenticatenaceae	OTU1396	2	4	2	7	4	9	1	4	3	6	4	3	49
d__Bacteria	k__norank_d__Bacteria	p__Bacteroidota	c__Bacteroidia	o__Flavobacteriales	f__Flavobacteriaceae	g__Flavobacterium	s__Flavobacterium_flevense	OTU110	0	1	0	0	0	0	0	0	0	0	0	1	2
d__Bacteria	k__norank_d__Bacteria	p__Chloroflexi	c__Chloroflexia	o__Chloroflexales	f__Roseiflexaceae	g__norank_f__Roseiflexaceae	s__uncultured_Chloroflexi_bacterium_g__norank_f__Roseiflexaceae	OTU2206	1	0	0	2	0	2	1	0	1	0	0	2	9
d__Bacteria	k__norank_d__Bacteria	p__Bacteroidota	c__Bacteroidia	o__unclassified_c__Bacteroidia	f__unclassified_c__Bacteroidia	g__unclassified_c__Bacteroidia	s__unclassified_c__Bacteroidia	OTU3709	0	0	0	0	0	0	1	0	0	0	0	1	2
d__Bacteria	k__norank_d__Bacteria	p__Acidobacteriota	c__Acidobacteriae	o__Solibacterales	f__Solibacteraceae	g__Candidatus_Solibacter	s__unclassified_g__Candidatus_Solibacter	OTU978	0	1	1	0	0	0	0	0	0	0	0	0	2
d__Bacteria	k__norank_d__Bacteria	p__Actinobacteriota	c__Actinobacteria	o__Propionibacteriales	f__Nocardioidaceae	g__Nocardioides	s__uncultured_organism_g__Nocardioides	OTU2891	3	8	7	5	2	7	2	2	3	4	2	2	47
d__Bacteria	k__norank_d__Bacteria	p__Armatimonadota	c__norank_p__Armatimonadota	o__norank_c__norank_p__Armatimonadota	f__norank_o__norank_c__norank_p__Armatimonadota	g__norank_f__norank_o__norank_c__norank_p__Armatimonadota	s__uncultured_bacterium_g__norank_f__norank_o__norank_c__norank_p__Armatimonadota	OTU2200	6	5	4	6	1	10	2	6	4	7	1	4	56
d__Bacteria	k__norank_d__Bacteria	p__Acidobacteriota	c__Holophagae	o__Subgroup_7	f__norank_o__Subgroup_7	g__norank_f__norank_o__Subgroup_7	s__uncultured_bacterium_g__norank_f__norank_o__Subgroup_7	OTU992	0	0	1	0	0	0	4	0	0	0	0	1	6
d__Bacteria	k__norank_d__Bacteria	p__Bacteroidota	c__Bacteroidia	o__Sphingobacteriales	f__NS11-12_marine_group	g__norank_f__NS11-12_marine_group	s__uncultured_Bacteroidetes_bacterium_g__norank_f__NS11-12_marine_group	OTU1626	0	0	1	0	0	0	0	1	0	0	0	0	2
d__Bacteria	k__norank_d__Bacteria	p__Chloroflexi	c__Anaerolineae	o__SBR1031	f__A4b	g__norank_f__A4b	s__metagenome_g__norank_f__A4b	OTU3347	0	0	0	0	0	0	1	1	0	0	0	0	2
d__Bacteria	k__norank_d__Bacteria	p__Firmicutes	c__Bacilli	o__Bacillales	f__Bacillaceae	g__norank_f__Bacillaceae	s__uncultured_organism_g__norank_f__Bacillaceae	OTU144	0	1	0	0	0	0	0	0	0	0	1	0	2
d__Bacteria	k__norank_d__Bacteria	p__Proteobacteria	c__Alphaproteobacteria	o__Tistrellales	f__Geminicoccaceae	g__Candidatus_Alysiosphaera	s__uncultured_bacterium_g__Candidatus_Alysiosphaera	OTU1327	4	7	5	7	3	5	1	5	2	5	5	3	52
d__Bacteria	k__norank_d__Bacteria	p__Chloroflexi	c__Anaerolineae	o__Anaerolineales	f__Anaerolineaceae	g__norank_f__Anaerolineaceae	s__unclassified_g__norank_f__Anaerolineaceae	OTU3600	4	5	13	6	3	6	4	8	4	3	8	10	74
d__Bacteria	k__norank_d__Bacteria	p__Chloroflexi	c__Anaerolineae	o__SBR1031	f__A4b	g__norank_f__A4b	s__unclassified_g__norank_f__A4b	OTU1675	0	1	3	1	0	1	1	4	4	0	0	3	18
d__Bacteria	k__norank_d__Bacteria	p__Firmicutes	c__Clostridia	o__Peptostreptococcales-Tissierellales	f__norank_o__Peptostreptococcales-Tissierellales	g__Tepidimicrobium	s__unclassified_g__Tepidimicrobium	OTU616	6	6	1	1	6	1	2	4	7	7	3	4	48
d__Bacteria	k__norank_d__Bacteria	p__Firmicutes	c__Symbiobacteriia	o__Symbiobacteriales	f__Symbiobacteraceae	g__Symbiobacterium	s__unclassified_g__Symbiobacterium	OTU428	0	1	0	0	0	1	0	0	1	0	0	0	3
d__Bacteria	k__norank_d__Bacteria	p__Proteobacteria	c__Alphaproteobacteria	o__Elsterales	f__norank_o__Elsterales	g__norank_f__norank_o__Elsterales	s__uncultured_Alphaproteobacteria_bacterium_g__norank_f__norank_o__Elsterales	OTU967	11	30	30	12	24	21	20	18	40	28	30	22	286
d__Bacteria	k__norank_d__Bacteria	p__Firmicutes	c__Clostridia	o__Oscillospirales	f__Ruminococcaceae	g__Ruminococcus	s__uncultured_Papillibacter_sp.	OTU2843	10	11	8	8	11	14	15	9	15	14	13	9	137
d__Bacteria	k__norank_d__Bacteria	p__Proteobacteria	c__Alphaproteobacteria	o__Azospirillales	f__Azospirillaceae	g__Azospirillum	s__unclassified_g__Azospirillum	OTU3748	0	2	0	0	1	1	1	2	0	2	1	0	10
d__Bacteria	k__norank_d__Bacteria	p__unclassified_k__norank_d__Bacteria	c__unclassified_k__norank_d__Bacteria	o__unclassified_k__norank_d__Bacteria	f__unclassified_k__norank_d__Bacteria	g__unclassified_k__norank_d__Bacteria	s__unclassified_k__norank_d__Bacteria	OTU3277	1	1	1	1	0	2	4	1	3	2	3	1	20
d__Bacteria	k__norank_d__Bacteria	p__Gemmatimonadota	c__Gemmatimonadetes	o__Gemmatimonadales	f__Gemmatimonadaceae	g__Gemmatimonas	s__unclassified_g__Gemmatimonas	OTU3836	0	3	3	2	4	5	1	2	1	1	0	3	25
d__Bacteria	k__norank_d__Bacteria	p__Planctomycetota	c__OM190	o__norank_c__OM190	f__norank_o__norank_c__OM190	g__norank_f__norank_o__norank_c__OM190	s__uncultured_bacterium_g__norank_f__norank_o__norank_c__OM190	OTU1222	2	5	2	0	5	1	2	3	5	2	3	3	33
d__Bacteria	k__norank_d__Bacteria	p__Proteobacteria	c__Gammaproteobacteria	o__Salinisphaerales	f__Solimonadaceae	g__Fontimonas	s__uncultured_bacterium_g__Fontimonas	OTU5506	0	1	0	0	0	0	0	0	0	0	0	1	2
d__Bacteria	k__norank_d__Bacteria	p__Planctomycetota	c__OM190	o__norank_c__OM190	f__norank_o__norank_c__OM190	g__norank_f__norank_o__norank_c__OM190	s__uncultured_bacterium_g__norank_f__norank_o__norank_c__OM190	OTU1224	0	0	2	1	0	2	0	0	2	0	0	0	7
d__Bacteria	k__norank_d__Bacteria	p__Proteobacteria	c__Gammaproteobacteria	o__Burkholderiales	f__Nitrosomonadaceae	g__MND1	s__unclassified_g__MND1	OTU3452	4	2	2	4	1	1	7	4	5	1	3	2	36
d__Bacteria	k__norank_d__Bacteria	p__Proteobacteria	c__Gammaproteobacteria	o__unclassified_c__Gammaproteobacteria	f__unclassified_c__Gammaproteobacteria	g__unclassified_c__Gammaproteobacteria	s__unclassified_c__Gammaproteobacteria	OTU3761	0	1	1	0	0	1	1	0	1	1	0	0	6
d__Bacteria	k__norank_d__Bacteria	p__Calditrichota	c__Calditrichia	o__Calditrichales	f__Calditrichaceae	g__JdFR-76	s__uncultured_bacterium_g__JdFR-76	OTU3022	1	0	1	0	2	0	0	0	0	0	0	0	4
d__Bacteria	k__norank_d__Bacteria	p__Planctomycetota	c__OM190	o__norank_c__OM190	f__norank_o__norank_c__OM190	g__norank_f__norank_o__norank_c__OM190	s__unclassified_g__norank_f__norank_o__norank_c__OM190	OTU1630	0	1	1	0	0	0	0	0	1	0	0	0	3
d__Bacteria	k__norank_d__Bacteria	p__Firmicutes	c__Bacilli	o__Thermoactinomycetales	f__Thermoactinomycetaceae	g__norank_f__Thermoactinomycetaceae	s__uncultured_compost_bacterium_g__norank_f__Thermoactinomycetaceae	OTU2839	0	0	1	0	1	0	1	0	0	0	0	0	3
d__Bacteria	k__norank_d__Bacteria	p__Verrucomicrobiota	c__Chlamydiae	o__Chlamydiales	f__Parachlamydiaceae	g__unclassified_f__Parachlamydiaceae	s__unclassified_f__Parachlamydiaceae	OTU1075	1	0	1	0	0	0	0	1	0	0	0	1	4
d__Bacteria	k__norank_d__Bacteria	p__Chloroflexi	c__Anaerolineae	o__Caldilineales	f__Caldilineaceae	g__Litorilinea	s__uncultured_bacterium_g__Litorilinea	OTU2219	2	3	0	5	4	3	3	1	1	1	3	1	27
d__Bacteria	k__norank_d__Bacteria	p__Gemmatimonadota	c__Gemmatimonadetes	o__Gemmatimonadales	f__Gemmatimonadaceae	g__norank_f__Gemmatimonadaceae	s__metagenome_g__norank_f__Gemmatimonadaceae	OTU3464	20	22	13	20	16	16	42	20	24	29	20	30	272
d__Bacteria	k__norank_d__Bacteria	p__unclassified_k__norank_d__Bacteria	c__unclassified_k__norank_d__Bacteria	o__unclassified_k__norank_d__Bacteria	f__unclassified_k__norank_d__Bacteria	g__unclassified_k__norank_d__Bacteria	s__unclassified_k__norank_d__Bacteria	OTU1175	0	2	2	0	2	2	1	3	1	2	1	1	17
d__Bacteria	k__norank_d__Bacteria	p__Proteobacteria	c__Gammaproteobacteria	o__Xanthomonadales	f__Xanthomonadaceae	g__Lysobacter	s__Lysobacter_yangpyeongensis	OTU107	12	3	1	2	3	9	4	2	2	3	1	2	44
d__Bacteria	k__norank_d__Bacteria	p__Acidobacteriota	c__AT-s3-28	o__norank_c__AT-s3-28	f__norank_o__norank_c__AT-s3-28	g__norank_f__norank_o__norank_c__AT-s3-28	s__uncultured_bacterium_g__norank_f__norank_o__norank_c__AT-s3-28	OTU713	1	0	0	0	0	0	0	0	0	0	0	0	1
d__Bacteria	k__norank_d__Bacteria	p__Firmicutes	c__Bacilli	o__Paenibacillales	f__Paenibacillaceae	g__Thermobacillus	s__uncultured_compost_bacterium_g__Thermobacillus	OTU5467	0	2	2	3	3	0	2	2	2	1	1	2	20
d__Bacteria	k__norank_d__Bacteria	p__Chloroflexi	c__Chloroflexia	o__Thermomicrobiales	f__Thermomicrobiaceae	g__Nitrolancea	s__uncultured_bacterium_g__Nitrolancea	OTU1152	4	4	4	6	2	5	3	5	6	5	3	3	50
d__Bacteria	k__norank_d__Bacteria	p__Bacteroidota	c__Bacteroidia	o__Flavobacteriales	f__Crocinitomicaceae	g__Crocinitomix	s__unclassified_g__Crocinitomix	OTU5143	0	0	0	0	0	1	0	0	0	3	2	0	6
d__Bacteria	k__norank_d__Bacteria	p__Bacteroidota	c__Bacteroidia	o__Cytophagales	f__unclassified_o__Cytophagales	g__unclassified_o__Cytophagales	s__unclassified_o__Cytophagales	OTU2717	2	0	0	0	2	0	2	1	0	0	3	1	11
d__Bacteria	k__norank_d__Bacteria	p__Chloroflexi	c__Anaerolineae	o__RBG-13-54-9	f__norank_o__RBG-13-54-9	g__norank_f__norank_o__RBG-13-54-9	s__uncultured_sludge_bacterium_A31	OTU4211	11	3	10	8	12	9	9	9	10	10	7	13	111
d__Bacteria	k__norank_d__Bacteria	p__Bacteroidota	c__Bacteroidia	o__Chitinophagales	f__Saprospiraceae	g__norank_f__Saprospiraceae	s__unclassified_g__norank_f__Saprospiraceae	OTU1856	40	37	38	31	24	31	21	23	25	27	24	19	340
d__Bacteria	k__norank_d__Bacteria	p__Chloroflexi	c__Anaerolineae	o__Anaerolineales	f__Anaerolineaceae	g__norank_f__Anaerolineaceae	s__unclassified_g__norank_f__Anaerolineaceae	OTU5123	2	2	2	1	0	2	0	2	3	1	3	2	20
d__Bacteria	k__norank_d__Bacteria	p__Verrucomicrobiota	c__Verrucomicrobiae	o__Opitutales	f__Puniceicoccaceae	g__Pelagicoccus	s__unclassified_g__Pelagicoccus	OTU2416	0	0	0	0	3	0	0	0	0	0	0	0	3
d__Bacteria	k__norank_d__Bacteria	p__Bacteroidota	c__Bacteroidia	o__Sphingobacteriales	f__AKYH767	g__norank_f__AKYH767	s__uncultured_bacterium_g__norank_f__AKYH767	OTU4296	2	5	3	7	3	3	3	3	2	1	2	3	37
d__Bacteria	k__norank_d__Bacteria	p__Gemmatimonadota	c__Gemmatimonadetes	o__Gemmatimonadales	f__Gemmatimonadaceae	g__norank_f__Gemmatimonadaceae	s__uncultured_Gemmatimonas_sp._g__norank_f__Gemmatimonadaceae	OTU1084	0	0	0	0	0	0	0	0	1	0	0	0	1
d__Bacteria	k__norank_d__Bacteria	p__Chloroflexi	c__Anaerolineae	o__SBR1031	f__norank_o__SBR1031	g__norank_f__norank_o__SBR1031	s__uncultured_Gemmatimonadetes_bacterium_g__norank_f__norank	OTU2863	0	1	2	1	2	0	0	5	7	5	2	0	25
d__Bacteria	k__norank_d__Bacteria	p__Verrucomicrobiota	c__Verrucomicrobiae	o__Pedosphaerales	f__Pedosphaeraceae	g__norank_f__Pedosphaeraceae	s__unclassified_g__norank_f__Pedosphaeraceae	OTU3087	0	1	1	0	1	0	0	2	0	2	1	1	9
d__Bacteria	k__norank_d__Bacteria	p__Bdellovibrionota	c__Bdellovibrionia	o__Bdellovibrionales	f__Bdellovibrionaceae	g__OM27_clade	s__unclassified_g__OM27_clade	OTU1899	0	0	1	0	0	0	0	1	1	0	0	0	3
d__Bacteria	k__norank_d__Bacteria	p__Bdellovibrionota	c__Bdellovibrionia	o__Bdellovibrionales	f__Bdellovibrionaceae	g__Bdellovibrio	s__uncultured_bacterium_g__Bdellovibrio	OTU3686	1	0	0	0	0	0	1	0	0	1	1	1	5
d__Bacteria	k__norank_d__Bacteria	p__MBNT15	c__norank_p__MBNT15	o__norank_c__norank_p__MBNT15	f__norank_o__norank_c__norank_p__MBNT15	g__norank_f__norank_o__norank_c__norank_p__MBNT15	s__uncultured_Sorangiineae_bacterium_g__norank_f__norank_o__norank	OTU1074	1	1	0	1	1	0	1	1	1	1	0	0	8
d__Bacteria	k__norank_d__Bacteria	p__Bacteroidota	c__Bacteroidia	o__Cytophagales	f__Microscillaceae	g__norank_f__Microscillaceae	s__unclassified_g__norank_f__Microscillaceae	OTU2793	0	0	0	0	2	0	0	0	0	2	0	0	4
d__Bacteria	k__norank_d__Bacteria	p__Gemmatimonadota	c__AKAU4049	o__norank_c__AKAU4049	f__norank_o__norank_c__AKAU4049	g__norank_f__norank_o__norank_c__AKAU4049	s__uncultured_bacterium_g__norank_f__norank_o__norank_c__AKAU4049	OTU3906	0	1	1	0	1	0	3	6	2	0	1	3	18
d__Bacteria	k__norank_d__Bacteria	p__Bacteroidota	c__Bacteroidia	o__Flavobacteriales	f__Flavobacteriaceae	g__Salinimicrobium	s__uncultured_bacterium_g__Salinimicrobium	OTU1200	7	3	3	7	4	10	0	1	0	2	0	1	38
d__Bacteria	k__norank_d__Bacteria	p__Verrucomicrobiota	c__Chlamydiae	o__Chlamydiales	f__Parachlamydiaceae	g__unclassified_f__Parachlamydiaceae	s__unclassified_f__Parachlamydiaceae	OTU42	3	0	0	1	0	1	0	1	0	0	0	0	6
d__Bacteria	k__norank_d__Bacteria	p__Proteobacteria	c__Gammaproteobacteria	o__unclassified_c__Gammaproteobacteria	f__unclassified_c__Gammaproteobacteria	g__unclassified_c__Gammaproteobacteria	s__unclassified_c__Gammaproteobacteria	OTU2969	0	7	0	0	1	1	0	0	0	0	1	0	10
d__Bacteria	k__norank_d__Bacteria	p__Actinobacteriota	c__Actinobacteria	o__Propionibacteriales	f__Nocardioidaceae	g__Aeromicrobium	s__unclassified_g__Aeromicrobium	OTU2475	11	6	4	12	17	14	3	3	4	2	2	5	83
d__Bacteria	k__norank_d__Bacteria	p__Proteobacteria	c__Alphaproteobacteria	o__Rhodobacterales	f__Rhodobacteraceae	g__unclassified_f__Rhodobacteraceae	s__unclassified_f__Rhodobacteraceae	OTU3223	0	0	0	0	0	0	1	1	1	0	0	0	3
d__Bacteria	k__norank_d__Bacteria	p__unclassified_k__norank_d__Bacteria	c__unclassified_k__norank_d__Bacteria	o__unclassified_k__norank_d__Bacteria	f__unclassified_k__norank_d__Bacteria	g__unclassified_k__norank_d__Bacteria	s__unclassified_k__norank_d__Bacteria	OTU1132	1	0	2	0	1	1	1	1	2	0	0	0	9
d__Bacteria	k__norank_d__Bacteria	p__Chloroflexi	c__unclassified_p__Chloroflexi	o__unclassified_p__Chloroflexi	f__unclassified_p__Chloroflexi	g__unclassified_p__Chloroflexi	s__unclassified_p__Chloroflexi	OTU307	0	1	0	0	0	1	0	0	0	0	1	0	3
d__Bacteria	k__norank_d__Bacteria	p__Proteobacteria	c__Alphaproteobacteria	o__Caulobacterales	f__Caulobacteraceae	g__Brevundimonas	s__Brevundimonas_diminuta	OTU4740	0	0	0	3	1	1	0	3	0	0	0	1	9
d__Bacteria	k__norank_d__Bacteria	p__Firmicutes	c__Bacilli	o__Paenibacillales	f__Paenibacillaceae	g__Paenibacillus	s__unclassified_g__Paenibacillus	OTU620	1	1	1	0	0	0	0	0	0	0	0	1	4
d__Bacteria	k__norank_d__Bacteria	p__Planctomycetota	c__Planctomycetes	o__Gemmatales	f__Gemmataceae	g__norank_f__Gemmataceae	s__unclassified_g__norank_f__Gemmataceae	OTU5195	1	0	0	0	0	0	0	0	0	1	0	1	3
d__Bacteria	k__norank_d__Bacteria	p__Planctomycetota	c__Planctomycetes	o__Gemmatales	f__Gemmataceae	g__Fimbriiglobus	s__uncultured_bacterium_g__Fimbriiglobus	OTU3047	0	1	0	1	1	1	0	0	0	0	0	0	4
d__Bacteria	k__norank_d__Bacteria	p__Actinobacteriota	c__Actinobacteria	o__Micrococcales	f__Intrasporangiaceae	g__unclassified_f__Intrasporangiaceae	s__unclassified_f__Intrasporangiaceae	OTU2742	46	50	45	72	44	67	33	34	30	26	41	48	536
d__Bacteria	k__norank_d__Bacteria	p__unclassified_k__norank_d__Bacteria	c__unclassified_k__norank_d__Bacteria	o__unclassified_k__norank_d__Bacteria	f__unclassified_k__norank_d__Bacteria	g__unclassified_k__norank_d__Bacteria	s__unclassified_k__norank_d__Bacteria	OTU2810	2	6	0	1	2	2	5	6	9	2	3	1	39
d__Bacteria	k__norank_d__Bacteria	p__Patescibacteria	c__Saccharimonadia	o__Saccharimonadales	f__LWQ8	g__norank_f__LWQ8	s__uncultured_bacterium_g__norank_f__LWQ8	OTU379	9	7	3	8	1	2	0	2	0	2	0	1	35
d__Bacteria	k__norank_d__Bacteria	p__Proteobacteria	c__Gammaproteobacteria	o__Diplorickettsiales	f__Diplorickettsiaceae	g__Aquicella	s__unclassified_g__Aquicella	OTU1927	0	0	1	0	0	1	0	0	0	0	0	0	2
d__Bacteria	k__norank_d__Bacteria	p__Firmicutes	c__Clostridia	o__norank_c__Clostridia	f__Gracilibacteraceae	g__Lutispora	s__uncultured_bacterium_g__Lutispora	OTU408	1	1	0	0	0	0	0	0	1	0	0	0	3
d__Bacteria	k__norank_d__Bacteria	p__Firmicutes	c__Symbiobacteriia	o__Symbiobacteriales	f__Symbiobacteraceae	g__norank_f__Symbiobacteraceae	s__unclassified_g__norank_f__Symbiobacteraceae	OTU3550	7	1	5	5	2	0	8	2	7	8	3	3	51
d__Bacteria	k__norank_d__Bacteria	p__Actinobacteriota	c__Acidimicrobiia	o__Microtrichales	f__Iamiaceae	g__Iamia	s__uncultured_bacterium_g__Iamia	OTU4748	25	29	27	39	52	60	34	24	40	40	34	39	443
d__Bacteria	k__norank_d__Bacteria	p__Proteobacteria	c__Gammaproteobacteria	o__Burkholderiales	f__Nitrosomonadaceae	g__MND1	s__uncultured_Burkholderiaceae_bacterium_g__MND1	OTU667	10	9	10	17	9	8	10	8	20	14	15	10	140
d__Bacteria	k__norank_d__Bacteria	p__Acidobacteriota	c__Acidobacteriae	o__Solibacterales	f__Solibacteraceae	g__Candidatus_Solibacter	s__uncultured_Acidobacteria_bacterium_g__Candidatus_Solibacter	OTU3381	3	0	0	0	0	0	3	0	0	0	0	0	6
d__Bacteria	k__norank_d__Bacteria	p__Gemmatimonadota	c__Gemmatimonadetes	o__Gemmatimonadales	f__Gemmatimonadaceae	g__Gemmatimonas	s__metagenome_g__Gemmatimonas	OTU3235	1	2	1	1	0	1	4	0	1	2	0	1	14
d__Bacteria	k__norank_d__Bacteria	p__Chloroflexi	c__TK10	o__norank_c__TK10	f__norank_o__norank_c__TK10	g__norank_f__norank_o__norank_c__TK10	s__uncultured_bacterium_g__norank_f__norank_o__norank_c__TK10	OTU1377	3	2	9	2	1	4	9	8	6	6	4	2	56
d__Bacteria	k__norank_d__Bacteria	p__Firmicutes	c__Clostridia	o__unclassified_c__Clostridia	f__unclassified_c__Clostridia	g__unclassified_c__Clostridia	s__unclassified_c__Clostridia	OTU5239	0	0	0	0	0	0	0	0	0	1	0	0	1
d__Bacteria	k__norank_d__Bacteria	p__Actinobacteriota	c__Thermoleophilia	o__Solirubrobacterales	f__67-14	g__norank_f__67-14	s__uncultured_bacterium_g__norank_f__67-14	OTU4330	10	6	12	3	9	19	12	12	11	10	13	6	123
d__Bacteria	k__norank_d__Bacteria	p__Sumerlaeota	c__Sumerlaeia	o__Sumerlaeales	f__Sumerlaeaceae	g__Sumerlaea	s__unclassified_g__Sumerlaea	OTU4770	0	0	0	0	0	0	0	2	0	0	1	0	3
d__Bacteria	k__norank_d__Bacteria	p__Patescibacteria	c__Gracilibacteria	o__Candidatus_Peribacteria	f__norank_o__Candidatus_Peribacteria	g__norank_f__norank_o__Candidatus_Peribacteria	s__uncultured_bacterium_g__norank_f__norank_o__Candidatus_Peribacteria	OTU1021	0	0	2	0	0	0	0	0	0	0	0	0	2
d__Bacteria	k__norank_d__Bacteria	p__Chloroflexi	c__unclassified_p__Chloroflexi	o__unclassified_p__Chloroflexi	f__unclassified_p__Chloroflexi	g__unclassified_p__Chloroflexi	s__unclassified_p__Chloroflexi	OTU4445	0	0	0	0	0	0	0	0	0	0	0	2	2
d__Bacteria	k__norank_d__Bacteria	p__Bacteroidota	c__Bacteroidia	o__Flavobacteriales	f__Flavobacteriaceae	g__norank_f__Flavobacteriaceae	s__Robertkochia_marina	OTU5364	1	0	0	0	0	0	0	0	1	0	4	1	7
d__Bacteria	k__norank_d__Bacteria	p__Chloroflexi	c__Anaerolineae	o__SBR1031	f__A4b	g__norank_f__A4b	s__uncultured_bacterium_g__norank_f__A4b	OTU5155	2	0	0	0	0	1	1	1	1	1	2	0	9
d__Bacteria	k__norank_d__Bacteria	p__Proteobacteria	c__Gammaproteobacteria	o__unclassified_c__Gammaproteobacteria	f__unclassified_c__Gammaproteobacteria	g__unclassified_c__Gammaproteobacteria	s__unclassified_c__Gammaproteobacteria	OTU3377	0	1	0	0	1	0	2	0	0	0	0	1	5
d__Bacteria	k__norank_d__Bacteria	p__Planctomycetota	c__Planctomycetes	o__Pirellulales	f__Pirellulaceae	g__Pirellula	s__unclassified_g__Pirellula	OTU2387	0	0	0	1	1	0	0	0	0	2	0	0	4
d__Bacteria	k__norank_d__Bacteria	p__Acidobacteriota	c__Thermoanaerobaculia	o__Thermoanaerobaculales	f__Thermoanaerobaculaceae	g__Subgroup_10	s__unclassified_g__Subgroup_10	OTU3557	11	15	10	13	18	11	27	14	22	20	20	15	196
d__Bacteria	k__norank_d__Bacteria	p__Firmicutes	c__Clostridia	o__Lachnospirales	f__Lachnospiraceae	g__unclassified_f__Lachnospiraceae	s__unclassified_f__Lachnospiraceae	OTU4593	1	0	2	1	2	0	1	1	2	0	0	2	12
d__Bacteria	k__norank_d__Bacteria	p__Verrucomicrobiota	c__Chlamydiae	o__Chlamydiales	f__Parachlamydiaceae	g__unclassified_f__Parachlamydiaceae	s__unclassified_f__Parachlamydiaceae	OTU5184	0	0	1	1	0	0	0	0	1	1	0	0	4
d__Bacteria	k__norank_d__Bacteria	p__Acidobacteriota	c__Thermoanaerobaculia	o__Thermoanaerobaculales	f__Thermoanaerobaculaceae	g__Subgroup_10	s__uncultured_bacterium_g__Subgroup_10	OTU454	0	1	0	1	0	1	0	1	1	2	1	1	9
d__Bacteria	k__norank_d__Bacteria	p__Gemmatimonadota	c__Gemmatimonadetes	o__Gemmatimonadales	f__Gemmatimonadaceae	g__norank_f__Gemmatimonadaceae	s__uncultured_bacterium_g__norank_f__Gemmatimonadaceae	OTU4320	1	0	0	0	0	1	3	1	0	5	0	0	11
d__Bacteria	k__norank_d__Bacteria	p__Dependentiae	c__Babeliae	o__Babeliales	f__unclassified_o__Babeliales	g__unclassified_o__Babeliales	s__unclassified_o__Babeliales	OTU317	0	2	0	0	0	0	1	1	0	0	0	0	4
d__Bacteria	k__norank_d__Bacteria	p__Proteobacteria	c__Alphaproteobacteria	o__Tistrellales	f__Geminicoccaceae	g__Candidatus_Alysiosphaera	s__uncultured_bacterium_g__Candidatus_Alysiosphaera	OTU4319	2	1	0	0	1	1	1	2	0	1	0	0	9
d__Bacteria	k__norank_d__Bacteria	p__Patescibacteria	c__Saccharimonadia	o__Saccharimonadales	f__unclassified_o__Saccharimonadales	g__unclassified_o__Saccharimonadales	s__unclassified_o__Saccharimonadales	OTU5603	3	0	2	0	0	3	0	0	1	3	0	5	17
d__Bacteria	k__norank_d__Bacteria	p__Chloroflexi	c__Anaerolineae	o__SBR1031	f__A4b	g__norank_f__A4b	s__uncultured_bacterium_g__norank_f__A4b	OTU2756	3	3	0	5	13	8	1	1	4	2	6	3	49
d__Bacteria	k__norank_d__Bacteria	p__Dependentiae	c__Babeliae	o__Babeliales	f__Vermiphilaceae	g__norank_f__Vermiphilaceae	s__unclassified_g__norank_f__Vermiphilaceae	OTU2606	0	0	0	0	1	0	0	0	0	0	1	1	3
d__Bacteria	k__norank_d__Bacteria	p__Chloroflexi	c__Chloroflexia	o__Chloroflexales	f__Chloroflexaceae	g__Candidatus_Chloroploca	s__uncultured_bacterium_g__Candidatus_Chloroploca	OTU4538	0	0	0	0	0	1	0	1	0	0	0	0	2
d__Bacteria	k__norank_d__Bacteria	p__Planctomycetota	c__Phycisphaerae	o__Phycisphaerales	f__Phycisphaeraceae	g__SM1A02	s__uncultured_bacterium_g__SM1A02	OTU4074	0	0	1	0	1	1	2	1	0	0	0	1	7
d__Bacteria	k__norank_d__Bacteria	p__Planctomycetota	c__Phycisphaerae	o__Phycisphaerales	f__Phycisphaeraceae	g__SM1A02	s__unclassified_g__SM1A02	OTU5272	0	1	1	1	1	3	0	0	3	1	2	0	13
d__Bacteria	k__norank_d__Bacteria	p__Planctomycetota	c__Planctomycetes	o__Gemmatales	f__Gemmataceae	g__norank_f__Gemmataceae	s__unclassified_g__norank_f__Gemmataceae	OTU2353	7	1	1	3	1	4	1	6	2	0	6	3	35
d__Bacteria	k__norank_d__Bacteria	p__Verrucomicrobiota	c__Verrucomicrobiae	o__Verrucomicrobiales	f__Verrucomicrobiaceae	g__Roseimicrobium	s__metagenome_g__Roseimicrobium	OTU2517	1	0	0	1	3	0	0	0	0	1	2	3	11
d__Bacteria	k__norank_d__Bacteria	p__Planctomycetota	c__Planctomycetes	o__norank_c__Planctomycetes	f__norank_o__norank_c__Planctomycetes	g__norank_f__norank_o__norank_c__Planctomycetes	s__uncultured_bacterium_g__norank_f__norank_o__norank_c__Planctomycetes	OTU4753	1	1	7	3	1	0	1	1	2	1	0	1	19
d__Bacteria	k__norank_d__Bacteria	p__Chloroflexi	c__Anaerolineae	o__RBG-13-54-9	f__norank_o__RBG-13-54-9	g__norank_f__norank_o__RBG-13-54-9	s__unclassified_g__norank_f__norank_o__RBG-13-54-9	OTU445	1	1	0	0	1	1	0	0	0	0	0	0	4
d__Bacteria	k__norank_d__Bacteria	p__Planctomycetota	c__OM190	o__norank_c__OM190	f__norank_o__norank_c__OM190	g__norank_f__norank_o__norank_c__OM190	s__unclassified_g__norank_f__norank_o__norank_c__OM190	OTU2915	3	1	2	1	2	3	0	1	1	1	1	1	17
d__Bacteria	k__norank_d__Bacteria	p__Planctomycetota	c__Planctomycetes	o__Gemmatales	f__Gemmataceae	g__norank_f__Gemmataceae	s__uncultured_bacterium_g__norank_f__Gemmataceae	OTU3075	1	0	0	1	2	1	0	1	1	0	0	0	7
d__Bacteria	k__norank_d__Bacteria	p__Cyanobacteria	c__Sericytochromatia	o__norank_c__Sericytochromatia	f__norank_o__norank_c__Sericytochromatia	g__norank_f__norank_o__norank_c__Sericytochromatia	s__uncultured_cyanobacterium_g__norank_f__norank_o__norank_c__Sericytochromatia	OTU4630	1	1	1	3	5	1	0	1	2	0	1	2	18
d__Bacteria	k__norank_d__Bacteria	p__Actinobacteriota	c__Actinobacteria	o__Corynebacteriales	f__Nocardiaceae	g__Gordonia	s__Gordonia_terrae	OTU3010	4	1	0	3	3	0	1	0	1	0	4	2	19
d__Bacteria	k__norank_d__Bacteria	p__Chloroflexi	c__Chloroflexia	o__Thermomicrobiales	f__AKYG1722	g__norank_f__AKYG1722	s__uncultured_bacterium_g__norank_f__AKYG1722	OTU2784	2	5	1	2	4	2	1	0	1	3	2	3	26
d__Bacteria	k__norank_d__Bacteria	p__Planctomycetota	c__Planctomycetes	o__Gemmatales	f__Gemmataceae	g__norank_f__Gemmataceae	s__uncultured_bacterium_g__norank_f__Gemmataceae	OTU3078	1	0	0	0	2	1	0	0	2	0	0	0	6
d__Bacteria	k__norank_d__Bacteria	p__Patescibacteria	c__Microgenomatia	o__Candidatus_Woesebacteria	f__norank_o__Candidatus_Woesebacteria	g__norank_f__norank_o__Candidatus_Woesebacteria	s__unclassified_g__norank_f__norank_o__Candidatus_Woesebacteria	OTU5429	0	0	0	0	0	0	0	0	0	0	1	0	1
d__Bacteria	k__norank_d__Bacteria	p__Planctomycetota	c__Phycisphaerae	o__Phycisphaerales	f__Phycisphaeraceae	g__SM1A02	s__uncultured_Planctomycetales_bacterium_g__SM1A02	OTU1697	0	0	2	0	0	1	0	0	1	0	2	0	6
d__Bacteria	k__norank_d__Bacteria	p__Actinobacteriota	c__Acidimicrobiia	o__Microtrichales	f__norank_o__Microtrichales	g__norank_f__norank_o__Microtrichales	s__uncultured_bacterium_g__norank_f__norank_o__Microtrichales	OTU5435	5	4	3	3	4	2	6	2	4	4	3	5	45
d__Bacteria	k__norank_d__Bacteria	p__Patescibacteria	c__Saccharimonadia	o__Saccharimonadales	f__unclassified_o__Saccharimonadales	g__unclassified_o__Saccharimonadales	s__unclassified_o__Saccharimonadales	OTU3387	0	0	0	0	0	0	2	0	0	0	0	0	2
d__Bacteria	k__norank_d__Bacteria	p__Proteobacteria	c__Gammaproteobacteria	o__unclassified_c__Gammaproteobacteria	f__unclassified_c__Gammaproteobacteria	g__unclassified_c__Gammaproteobacteria	s__unclassified_c__Gammaproteobacteria	OTU610	1	2	0	1	1	1	1	0	0	4	1	2	14
d__Bacteria	k__norank_d__Bacteria	p__Patescibacteria	c__Saccharimonadia	o__Saccharimonadales	f__WWH38	g__norank_f__WWH38	s__uncultured_bacterium_g__norank_f__WWH38	OTU4891	0	0	1	0	0	0	0	0	1	0	0	0	2
d__Bacteria	k__norank_d__Bacteria	p__Planctomycetota	c__Phycisphaerae	o__Phycisphaerales	f__Phycisphaeraceae	g__SM1A02	s__uncultured_bacterium_g__SM1A02	OTU2883	0	0	0	0	2	1	3	0	2	2	0	2	12
d__Bacteria	k__norank_d__Bacteria	p__Armatimonadota	c__Armatimonadia	o__Armatimonadales	f__norank_o__Armatimonadales	g__norank_f__norank_o__Armatimonadales	s__unclassified_g__norank_f__norank_o__Armatimonadales	OTU5485	0	0	0	0	1	0	0	1	1	0	0	1	4
d__Bacteria	k__norank_d__Bacteria	p__Proteobacteria	c__Alphaproteobacteria	o__Rhizobiales	f__unclassified_o__Rhizobiales	g__unclassified_o__Rhizobiales	s__unclassified_o__Rhizobiales	OTU4185	16	11	11	12	10	16	16	11	13	18	14	12	160
d__Bacteria	k__norank_d__Bacteria	p__Myxococcota	c__Polyangia	o__unclassified_c__Polyangia	f__unclassified_c__Polyangia	g__unclassified_c__Polyangia	s__unclassified_c__Polyangia	OTU3015	3	2	0	0	3	1	3	0	2	2	1	2	19
d__Bacteria	k__norank_d__Bacteria	p__Firmicutes	c__Bacilli	o__Bacillales	f__Bacillaceae	g__Bacillus	s__unclassified_g__Bacillus	OTU1728	5	11	11	6	8	5	4	4	6	6	4	5	75
d__Bacteria	k__norank_d__Bacteria	p__Proteobacteria	c__Alphaproteobacteria	o__Rhizobiales	f__Rhizobiaceae	g__unclassified_f__Rhizobiaceae	s__unclassified_f__Rhizobiaceae	OTU10	101	104	104	91	97	143	105	67	105	151	117	110	1295
d__Bacteria	k__norank_d__Bacteria	p__Firmicutes	c__Thermovenabulia	o__Thermovenabulales	f__norank_o__Thermovenabulales	g__Tepidanaerobacter	s__unclassified_g__Tepidanaerobacter	OTU1392	0	0	1	0	0	1	0	0	0	0	0	1	3
d__Bacteria	k__norank_d__Bacteria	p__Dependentiae	c__Babeliae	o__Babeliales	f__UBA12409	g__norank_f__UBA12409	s__uncultured_bacterium_g__norank_f__UBA12409	OTU3696	1	0	0	0	0	0	1	0	0	0	1	0	3
d__Bacteria	k__norank_d__Bacteria	p__Dependentiae	c__Babeliae	o__Babeliales	f__Vermiphilaceae	g__norank_f__Vermiphilaceae	s__unclassified_g__norank_f__Vermiphilaceae	OTU1495	0	1	1	0	0	0	0	0	0	0	1	0	3
d__Bacteria	k__norank_d__Bacteria	p__Acidobacteriota	c__Blastocatellia	o__Blastocatellales	f__Blastocatellaceae	g__Stenotrophobacter	s__unclassified_g__Stenotrophobacter	OTU3910	4	0	3	4	1	1	2	7	3	0	1	4	30
d__Bacteria	k__norank_d__Bacteria	p__Desulfobacterota	c__norank_p__Desulfobacterota	o__norank_c__norank_p__Desulfobacterota	f__norank_o__norank_c__norank_p__Desulfobacterota	g__norank_f__norank_o__norank_c__norank_p__Desulfobacterota	s__unclassified_g__norank_f__norank_o__norank_c__norank_p__Desulfobacterota	OTU2875	9	6	7	5	9	12	22	15	11	7	12	13	128
d__Bacteria	k__norank_d__Bacteria	p__Planctomycetota	c__Phycisphaerae	o__Phycisphaerales	f__Phycisphaeraceae	g__norank_f__Phycisphaeraceae	s__unclassified_g__norank_f__Phycisphaeraceae	OTU5382	0	0	0	0	0	0	1	2	1	1	1	0	6
d__Bacteria	k__norank_d__Bacteria	p__Proteobacteria	c__Alphaproteobacteria	o__unclassified_c__Alphaproteobacteria	f__unclassified_c__Alphaproteobacteria	g__unclassified_c__Alphaproteobacteria	s__unclassified_c__Alphaproteobacteria	OTU1143	0	1	0	0	0	0	0	0	0	0	0	1	2
d__Bacteria	k__norank_d__Bacteria	p__Planctomycetota	c__Planctomycetes	o__Pirellulales	f__Pirellulaceae	g__Pirellula	s__metagenome_g__Pirellula	OTU433	0	1	0	1	0	0	0	0	0	0	0	0	2
d__Bacteria	k__norank_d__Bacteria	p__Chloroflexi	c__Anaerolineae	o__SBR1031	f__norank_o__SBR1031	g__norank_f__norank_o__SBR1031	s__uncultured_compost_bacterium_g__norank_f__norank_o__SBR1031	OTU5069	0	0	0	0	0	0	0	1	1	1	1	0	4
d__Bacteria	k__norank_d__Bacteria	p__Bacteroidota	c__Bacteroidia	o__Cytophagales	f__Cyclobacteriaceae	g__Algoriphagus	s__unclassified_g__Algoriphagus	OTU1736	0	1	0	4	0	1	1	0	0	0	2	1	10
d__Bacteria	k__norank_d__Bacteria	p__Proteobacteria	c__Gammaproteobacteria	o__Diplorickettsiales	f__Diplorickettsiaceae	g__Aquicella	s__uncultured_Aquicella_sp._g__Aquicella	OTU1372	1	0	2	0	0	0	0	1	1	0	0	0	5
d__Bacteria	k__norank_d__Bacteria	p__Chloroflexi	c__Anaerolineae	o__Caldilineales	f__Caldilineaceae	g__norank_f__Caldilineaceae	s__uncultured_bacterium_g__norank_f__Caldilineaceae	OTU1857	1	0	1	1	1	0	0	0	0	1	0	0	5
d__Bacteria	k__norank_d__Bacteria	p__Verrucomicrobiota	c__Verrucomicrobiae	o__Pedosphaerales	f__Pedosphaeraceae	g__norank_f__Pedosphaeraceae	s__unclassified_g__norank_f__Pedosphaeraceae	OTU4683	0	0	0	0	0	0	0	0	0	0	1	0	1
d__Bacteria	k__norank_d__Bacteria	p__Actinobacteriota	c__Actinobacteria	o__Corynebacteriales	f__Nocardiaceae	g__Nocardia	s__unclassified_g__Nocardia	OTU2251	2	1	0	1	1	0	0	0	0	1	1	0	7
d__Bacteria	k__norank_d__Bacteria	p__Planctomycetota	c__OM190	o__norank_c__OM190	f__norank_o__norank_c__OM190	g__norank_f__norank_o__norank_c__OM190	s__metagenome_g__norank_f__norank_o__norank_c__OM190	OTU1929	1	0	5	0	1	1	1	2	3	1	0	3	18
d__Bacteria	k__norank_d__Bacteria	p__unclassified_k__norank_d__Bacteria	c__unclassified_k__norank_d__Bacteria	o__unclassified_k__norank_d__Bacteria	f__unclassified_k__norank_d__Bacteria	g__unclassified_k__norank_d__Bacteria	s__unclassified_k__norank_d__Bacteria	OTU4880	1	0	0	0	0	0	0	0	1	0	1	0	3
d__Bacteria	k__norank_d__Bacteria	p__Patescibacteria	c__norank_p__Patescibacteria	o__norank_c__norank_p__Patescibacteria	f__norank_o__norank_c__norank_p__Patescibacteria	g__norank_f__norank_o__norank_c__norank_p__Patescibacteria	s__uncultured_bacterium_g__norank_f__norank_o__norank_c__norank_p__Patescibacteria	OTU3907	0	0	0	0	0	0	8	4	6	2	1	2	23
d__Bacteria	k__norank_d__Bacteria	p__unclassified_k__norank_d__Bacteria	c__unclassified_k__norank_d__Bacteria	o__unclassified_k__norank_d__Bacteria	f__unclassified_k__norank_d__Bacteria	g__unclassified_k__norank_d__Bacteria	s__unclassified_k__norank_d__Bacteria	OTU4888	0	0	0	0	0	0	0	0	1	1	0	1	3
d__Bacteria	k__norank_d__Bacteria	p__Planctomycetota	c__Pla4_lineage	o__norank_c__Pla4_lineage	f__norank_o__norank_c__Pla4_lineage	g__norank_f__norank_o__norank_c__Pla4_lineage	s__metagenome_g__norank_f__norank_o__norank_c__Pla4_lineage	OTU4310	4	0	1	0	0	2	5	4	1	2	1	4	24
d__Bacteria	k__norank_d__Bacteria	p__Planctomycetota	c__OM190	o__norank_c__OM190	f__norank_o__norank_c__OM190	g__norank_f__norank_o__norank_c__OM190	s__wastewater_metagenome_g__norank_f__norank_o__norank_c__OM190	OTU44	2	0	0	0	0	0	0	0	0	0	0	0	2
d__Bacteria	k__norank_d__Bacteria	p__Verrucomicrobiota	c__Chlamydiae	o__Chlamydiales	f__cvE6	g__norank_f__cvE6	s__uncultured_bacterium_g__norank_f__cvE6	OTU2928	3	3	0	0	1	0	0	0	7	0	2	1	17
d__Bacteria	k__norank_d__Bacteria	p__Chloroflexi	c__Chloroflexia	o__Thermomicrobiales	f__AKYG1722	g__norank_f__AKYG1722	s__unclassified_g__norank_f__AKYG1722	OTU1050	2	2	0	1	1	3	0	5	3	3	2	1	23
d__Bacteria	k__norank_d__Bacteria	p__Chloroflexi	c__Anaerolineae	o__SBR1031	f__norank_o__SBR1031	g__norank_f__norank_o__SBR1031	s__uncultured_bacterium_g__norank_f__norank_o__SBR1031	OTU676	5	2	3	15	7	17	0	9	9	0	5	1	73
d__Bacteria	k__norank_d__Bacteria	p__Acidobacteriota	c__Acidobacteriae	o__Bryobacterales	f__Bryobacteraceae	g__Bryobacter	s__unclassified_g__Bryobacter	OTU3467	3	5	1	4	2	3	3	2	1	3	4	1	32
d__Bacteria	k__norank_d__Bacteria	p__Acidobacteriota	c__Acidobacteriae	o__Bryobacterales	f__Bryobacteraceae	g__Bryobacter	s__unclassified_g__Bryobacter	OTU3466	3	3	3	8	1	2	4	3	1	2	6	3	39
d__Bacteria	k__norank_d__Bacteria	p__unclassified_k__norank_d__Bacteria	c__unclassified_k__norank_d__Bacteria	o__unclassified_k__norank_d__Bacteria	f__unclassified_k__norank_d__Bacteria	g__unclassified_k__norank_d__Bacteria	s__unclassified_k__norank_d__Bacteria	OTU3218	0	1	0	0	0	1	0	2	2	0	0	0	6
d__Bacteria	k__norank_d__Bacteria	p__Deinococcota	c__Deinococci	o__Deinococcales	f__Trueperaceae	g__Truepera	s__uncultured_bacterium_g__Truepera	OTU225	3	2	1	0	0	2	0	0	0	0	0	0	8
d__Bacteria	k__norank_d__Bacteria	p__Cyanobacteria	c__Vampirivibrionia	o__Obscuribacterales	f__Obscuribacteraceae	g__norank_f__Obscuribacteraceae	s__uncultured_bacterium_g__norank_f__Obscuribacteraceae	OTU1553	0	1	1	0	0	0	0	0	0	0	1	0	3
d__Bacteria	k__norank_d__Bacteria	p__FCPU426	c__norank_p__FCPU426	o__norank_c__norank_p__FCPU426	f__norank_o__norank_c__norank_p__FCPU426	g__norank_f__norank_o__norank_c__norank_p__FCPU426	s__uncultured_bacterium_g__norank_f__norank_o__norank_c__norank_p__FCPU426	OTU702	0	1	1	1	3	1	3	1	1	0	0	2	14
d__Bacteria	k__norank_d__Bacteria	p__Acidobacteriota	c__Subgroup_25	o__norank_c__Subgroup_25	f__norank_o__norank_c__Subgroup_25	g__norank_f__norank_o__norank_c__Subgroup_25	s__uncultured_bacterium_g__norank_f__norank_o__norank_c__Subgroup_25	OTU5079	1	0	0	0	0	0	0	2	0	1	0	0	4
d__Bacteria	k__norank_d__Bacteria	p__Planctomycetota	c__OM190	o__norank_c__OM190	f__norank_o__norank_c__OM190	g__norank_f__norank_o__norank_c__OM190	s__unclassified_g__norank_f__norank_o__norank_c__OM190	OTU3794	1	0	1	0	0	0	1	0	2	1	1	2	9
d__Bacteria	k__norank_d__Bacteria	p__Nitrospirota	c__Nitrospiria	o__Nitrospirales	f__Nitrospiraceae	g__Nitrospira	s__unclassified_g__Nitrospira	OTU2248	0	0	0	3	0	0	0	0	0	0	0	0	3
d__Bacteria	k__norank_d__Bacteria	p__Verrucomicrobiota	c__Chlamydiae	o__Chlamydiales	f__unclassified_o__Chlamydiales	g__unclassified_o__Chlamydiales	s__unclassified_o__Chlamydiales	OTU5229	0	0	0	0	1	1	0	0	0	1	0	0	3
d__Bacteria	k__norank_d__Bacteria	p__unclassified_k__norank_d__Bacteria	c__unclassified_k__norank_d__Bacteria	o__unclassified_k__norank_d__Bacteria	f__unclassified_k__norank_d__Bacteria	g__unclassified_k__norank_d__Bacteria	s__unclassified_k__norank_d__Bacteria	OTU953	4	7	9	4	6	6	5	6	8	5	5	2	67
d__Bacteria	k__norank_d__Bacteria	p__Actinobacteriota	c__Actinobacteria	o__Propionibacteriales	f__Nocardioidaceae	g__unclassified_f__Nocardioidaceae	s__unclassified_f__Nocardioidaceae	OTU3505	11	5	4	6	5	5	16	9	16	11	8	6	102
d__Bacteria	k__norank_d__Bacteria	p__Planctomycetota	c__Phycisphaerae	o__Phycisphaerales	f__Phycisphaeraceae	g__SM1A02	s__uncultured_Planctomycetales_bacterium_g__SM1A02	OTU4523	0	0	0	0	0	0	0	1	0	0	0	0	1
d__Bacteria	k__norank_d__Bacteria	p__Planctomycetota	c__Planctomycetes	o__Pirellulales	f__Pirellulaceae	g__Blastopirellula	s__unclassified_g__Blastopirellula	OTU4083	0	3	2	6	2	1	2	2	2	1	2	5	28
d__Bacteria	k__norank_d__Bacteria	p__Firmicutes	c__Limnochordia	o__norank_c__Limnochordia	f__norank_o__norank_c__Limnochordia	g__Hydrogenispora	s__uncultured_Clostridium_sp._g__Hydrogenispora	OTU2831	2	1	3	2	4	2	0	1	1	1	1	0	18
d__Bacteria	k__norank_d__Bacteria	p__Acidobacteriota	c__Subgroup_5	o__norank_c__Subgroup_5	f__norank_o__norank_c__Subgroup_5	g__norank_f__norank_o__norank_c__Subgroup_5	s__unclassified_g__norank_f__norank_o__norank_c__Subgroup_5	OTU814	4	2	0	4	0	0	2	2	0	0	1	4	19
d__Bacteria	k__norank_d__Bacteria	p__Chloroflexi	c__Anaerolineae	o__Anaerolineales	f__Anaerolineaceae	g__norank_f__Anaerolineaceae	s__unclassified_g__norank_f__Anaerolineaceae	OTU1704	6	6	2	1	3	4	3	7	5	2	7	7	53
d__Bacteria	k__norank_d__Bacteria	p__Proteobacteria	c__Gammaproteobacteria	o__unclassified_c__Gammaproteobacteria	f__unclassified_c__Gammaproteobacteria	g__unclassified_c__Gammaproteobacteria	s__unclassified_c__Gammaproteobacteria	OTU2599	3	0	0	0	1	0	0	1	0	0	1	2	8
d__Bacteria	k__norank_d__Bacteria	p__Actinobacteriota	c__Actinobacteria	o__Frankiales	f__Geodermatophilaceae	g__Geodermatophilus	s__unclassified_g__Geodermatophilus	OTU3502	6	7	13	16	26	24	22	21	15	14	9	14	187
d__Bacteria	k__norank_d__Bacteria	p__Myxococcota	c__Polyangia	o__Haliangiales	f__Haliangiaceae	g__Haliangium	s__metagenome_g__Haliangium	OTU1890	0	1	1	1	2	2	0	2	0	0	0	2	11
d__Bacteria	k__norank_d__Bacteria	p__Proteobacteria	c__Alphaproteobacteria	o__Rhodospirillales	f__norank_o__Rhodospirillales	g__norank_f__norank_o__Rhodospirillales	s__uncultured_proteobacterium_g__norank_f__norank_o__Rhodospirillales	OTU3695	1	1	1	0	0	0	2	1	1	0	0	1	8
d__Bacteria	k__norank_d__Bacteria	p__Planctomycetota	c__Phycisphaerae	o__S-70	f__norank_o__S-70	g__norank_f__norank_o__S-70	s__uncultured_bacterium_g__norank_f__norank_o__S-70	OTU3547	0	1	1	2	1	2	4	2	3	2	3	2	23
d__Bacteria	k__norank_d__Bacteria	p__Planctomycetota	c__OM190	o__norank_c__OM190	f__norank_o__norank_c__OM190	g__norank_f__norank_o__norank_c__OM190	s__uncultured_bacterium_g__norank_f__norank_o__norank_c__OM190	OTU2145	0	0	0	1	0	0	0	0	2	0	1	0	4
d__Bacteria	k__norank_d__Bacteria	p__unclassified_k__norank_d__Bacteria	c__unclassified_k__norank_d__Bacteria	o__unclassified_k__norank_d__Bacteria	f__unclassified_k__norank_d__Bacteria	g__unclassified_k__norank_d__Bacteria	s__unclassified_k__norank_d__Bacteria	OTU5130	0	0	0	0	0	0	0	0	0	1	0	1	2
d__Bacteria	k__norank_d__Bacteria	p__Bdellovibrionota	c__Oligoflexia	o__0319-6G20	f__norank_o__0319-6G20	g__norank_f__norank_o__0319-6G20	s__unclassified_g__norank_f__norank_o__0319-6G20	OTU3737	0	2	0	0	0	1	1	0	1	0	0	0	5
d__Bacteria	k__norank_d__Bacteria	p__Gemmatimonadota	c__S0134_terrestrial_group	o__norank_c__S0134_terrestrial_group	f__norank_o__norank_c__S0134_terrestrial_group	g__norank_f__norank_o__norank_c__S0134_terrestrial_group	s__unclassified_g__norank_f__norank_o__norank_c__S0134_terrestrial_group	OTU264	0	2	0	2	0	0	1	3	4	5	0	4	21
d__Bacteria	k__norank_d__Bacteria	p__Actinobacteriota	c__Actinobacteria	o__Streptosporangiales	f__Nocardiopsaceae	g__Nocardiopsis	s__Nocardiopsis_dassonvillei	OTU714	3	1	4	10	3	1	2	0	1	3	9	1	38
d__Bacteria	k__norank_d__Bacteria	p__Myxococcota	c__Polyangia	o__Polyangiales	f__Sandaracinaceae	g__norank_f__Sandaracinaceae	s__unclassified_g__norank_f__Sandaracinaceae	OTU1831	1	0	3	0	0	2	0	0	0	3	1	0	10
d__Bacteria	k__norank_d__Bacteria	p__Actinobacteriota	c__Actinobacteria	o__Streptosporangiales	f__Streptosporangiaceae	g__Thermopolyspora	s__unclassified_g__Thermopolyspora	OTU1007	13	11	8	10	5	14	5	14	3	13	4	4	104
d__Bacteria	k__norank_d__Bacteria	p__Armatimonadota	c__Fimbriimonadia	o__Fimbriimonadales	f__Fimbriimonadaceae	g__norank_f__Fimbriimonadaceae	s__unclassified_g__norank_f__Fimbriimonadaceae	OTU262	1	0	0	1	1	1	1	0	2	1	2	1	11
d__Bacteria	k__norank_d__Bacteria	p__Proteobacteria	c__Gammaproteobacteria	o__unclassified_c__Gammaproteobacteria	f__unclassified_c__Gammaproteobacteria	g__unclassified_c__Gammaproteobacteria	s__unclassified_c__Gammaproteobacteria	OTU877	0	0	1	0	0	1	0	0	1	0	0	1	4
d__Bacteria	k__norank_d__Bacteria	p__Bacteroidota	c__Bacteroidia	o__Sphingobacteriales	f__env.OPS_17	g__norank_f__env.OPS_17	s__unclassified_g__norank_f__env.OPS_17	OTU1565	0	0	2	0	3	0	0	2	0	1	0	0	8
d__Bacteria	k__norank_d__Bacteria	p__Actinobacteriota	c__Thermoleophilia	o__Solirubrobacterales	f__Solirubrobacteraceae	g__Solirubrobacter	s__unclassified_g__Solirubrobacter	OTU3719	1	0	0	0	0	1	1	0	0	4	0	0	7
d__Bacteria	k__norank_d__Bacteria	p__Chloroflexi	c__Anaerolineae	o__SBR1031	f__A4b	g__OLB13	s__uncultured_bacterium_g__OLB13	OTU4340	0	1	0	1	1	2	8	15	9	0	13	7	57
d__Bacteria	k__norank_d__Bacteria	p__Sumerlaeota	c__Sumerlaeia	o__Sumerlaeales	f__Sumerlaeaceae	g__Sumerlaea	s__uncultured_Acidobacteria_bacterium_g__Sumerlaea	OTU3458	0	1	0	1	1	0	3	0	0	0	0	0	6
d__Bacteria	k__norank_d__Bacteria	p__Chloroflexi	c__Chloroflexia	o__Chloroflexales	f__Roseiflexaceae	g__norank_f__Roseiflexaceae	s__unclassified_g__norank_f__Roseiflexaceae	OTU2674	1	2	1	4	4	3	1	2	4	4	1	2	29
d__Bacteria	k__norank_d__Bacteria	p__Latescibacterota	c__norank_p__Latescibacterota	o__norank_c__norank_p__Latescibacterota	f__norank_o__norank_c__norank_p__Latescibacterota	g__norank_f__norank_o__norank_c__norank_p__Latescibacterota	s__unclassified_g__norank_f__norank_o__norank_c__norank_p__Latescibacterota	OTU1809	1	1	1	1	1	0	2	5	3	2	2	7	26
d__Bacteria	k__norank_d__Bacteria	p__Chloroflexi	c__Anaerolineae	o__unclassified_c__Anaerolineae	f__unclassified_c__Anaerolineae	g__unclassified_c__Anaerolineae	s__unclassified_c__Anaerolineae	OTU5032	0	0	0	0	0	0	0	4	1	4	1	1	11
d__Bacteria	k__norank_d__Bacteria	p__Chloroflexi	c__Chloroflexia	o__Thermomicrobiales	f__AKYG1722	g__norank_f__AKYG1722	s__unclassified_g__norank_f__AKYG1722	OTU1581	1	1	1	0	0	2	0	0	0	0	1	1	7
d__Bacteria	k__norank_d__Bacteria	p__Chloroflexi	c__Anaerolineae	o__Anaerolineales	f__Anaerolineaceae	g__norank_f__Anaerolineaceae	s__unclassified_g__norank_f__Anaerolineaceae	OTU2945	1	0	0	0	1	0	0	3	2	0	3	0	10
d__Bacteria	k__norank_d__Bacteria	p__Proteobacteria	c__Alphaproteobacteria	o__Caulobacterales	f__Hyphomonadaceae	g__Hirschia	s__metagenome_g__Hirschia	OTU368	0	0	0	0	0	1	0	0	0	1	1	1	4
d__Bacteria	k__norank_d__Bacteria	p__Planctomycetota	c__OM190	o__norank_c__OM190	f__norank_o__norank_c__OM190	g__norank_f__norank_o__norank_c__OM190	s__unclassified_g__norank_f__norank_o__norank_c__OM190	OTU867	4	1	1	3	0	1	0	1	2	0	0	2	15
d__Bacteria	k__norank_d__Bacteria	p__Proteobacteria	c__Gammaproteobacteria	o__Coxiellales	f__Coxiellaceae	g__Coxiella	s__unclassified_g__Coxiella	OTU5309	1	0	0	0	0	0	0	0	0	0	2	0	3
d__Bacteria	k__norank_d__Bacteria	p__Elusimicrobiota	c__Lineage_IIb	o__norank_c__Lineage_IIb	f__norank_o__norank_c__Lineage_IIb	g__norank_f__norank_o__norank_c__Lineage_IIb	s__uncultured_bacterium_g__norank_f__norank_o__norank_c__Lineage_IIb	OTU4846	1	0	0	0	1	0	0	0	1	0	0	1	4
d__Bacteria	k__norank_d__Bacteria	p__Proteobacteria	c__Alphaproteobacteria	o__unclassified_c__Alphaproteobacteria	f__unclassified_c__Alphaproteobacteria	g__unclassified_c__Alphaproteobacteria	s__unclassified_c__Alphaproteobacteria	OTU4253	2	1	2	1	2	1	7	5	3	6	3	3	36
d__Bacteria	k__norank_d__Bacteria	p__Actinobacteriota	c__Actinobacteria	o__Micrococcales	f__Intrasporangiaceae	g__Oryzihumus	s__uncultured_bacterium_g__Oryzihumus	OTU102	1	0	0	0	0	1	0	0	1	0	1	2	6
d__Bacteria	k__norank_d__Bacteria	p__Acidobacteriota	c__Acidobacteriae	o__unclassified_c__Acidobacteriae	f__unclassified_c__Acidobacteriae	g__unclassified_c__Acidobacteriae	s__unclassified_c__Acidobacteriae	OTU3694	1	1	1	0	0	0	2	0	2	1	0	0	8
d__Bacteria	k__norank_d__Bacteria	p__Chloroflexi	c__Anaerolineae	o__SBR1031	f__A4b	g__norank_f__A4b	s__unclassified_g__norank_f__A4b	OTU3273	1	0	0	2	0	1	2	0	0	3	0	0	9
d__Bacteria	k__norank_d__Bacteria	p__Chloroflexi	c__Anaerolineae	o__Ardenticatenales	f__norank_o__Ardenticatenales	g__norank_f__norank_o__Ardenticatenales	s__unclassified_g__norank_f__norank_o__Ardenticatenales	OTU1962	15	13	15	8	8	12	6	7	9	7	11	11	122
d__Bacteria	k__norank_d__Bacteria	p__Proteobacteria	c__Gammaproteobacteria	o__Salinisphaerales	f__Solimonadaceae	g__Polycyclovorans	s__unclassified_g__Polycyclovorans	OTU403	0	0	0	0	0	1	0	2	1	0	0	0	4
d__Bacteria	k__norank_d__Bacteria	p__Dependentiae	c__Babeliae	o__Babeliales	f__unclassified_o__Babeliales	g__unclassified_o__Babeliales	s__unclassified_o__Babeliales	OTU5584	0	0	0	0	0	0	0	0	0	0	0	2	2
d__Bacteria	k__norank_d__Bacteria	p__Planctomycetota	c__OM190	o__norank_c__OM190	f__norank_o__norank_c__OM190	g__norank_f__norank_o__norank_c__OM190	s__uncultured_microorganism_g__norank_f__norank_o__norank_c__OM190	OTU3774	1	2	6	1	0	5	4	12	7	4	5	3	50
d__Bacteria	k__norank_d__Bacteria	p__Proteobacteria	c__Alphaproteobacteria	o__Micavibrionales	f__Micavibrionaceae	g__norank_f__Micavibrionaceae	s__unclassified_g__norank_f__Micavibrionaceae	OTU3889	0	0	1	0	0	0	1	0	1	0	3	1	7
d__Bacteria	k__norank_d__Bacteria	p__Chloroflexi	c__Anaerolineae	o__Caldilineales	f__Caldilineaceae	g__norank_f__Caldilineaceae	s__uncultured_soil_bacterium_g__norank_f__Caldilineaceae	OTU1528	13	29	15	23	30	9	21	9	17	11	12	17	206
d__Bacteria	k__norank_d__Bacteria	p__Proteobacteria	c__Alphaproteobacteria	o__Rhodobacterales	f__Rhodobacteraceae	g__unclassified_f__Rhodobacteraceae	s__unclassified_f__Rhodobacteraceae	OTU501	1	1	0	0	1	2	0	0	0	0	1	1	7
d__Bacteria	k__norank_d__Bacteria	p__Proteobacteria	c__Gammaproteobacteria	o__Acidiferrobacterales	f__Acidiferrobacteraceae	g__Sulfurifustis	s__Sulfuricaulis_limicola	OTU2929	0	2	0	0	2	0	0	0	6	2	0	0	12
d__Bacteria	k__norank_d__Bacteria	p__Patescibacteria	c__Saccharimonadia	o__Saccharimonadales	f__norank_o__Saccharimonadales	g__norank_f__norank_o__Saccharimonadales	s__uncultured_bacterium_g__norank_f__norank_o__Saccharimonadales	OTU618	2	1	0	1	1	0	0	0	1	3	0	0	9
d__Bacteria	k__norank_d__Bacteria	p__Myxococcota	c__Myxococcia	o__Myxococcales	f__Myxococcaceae	g__P3OB-42	s__unclassified_g__P3OB-42	OTU4622	0	0	0	1	0	1	0	1	2	0	0	1	6
d__Bacteria	k__norank_d__Bacteria	p__Firmicutes	c__Limnochordia	o__Limnochordales	f__norank_o__Limnochordales	g__norank_f__norank_o__Limnochordales	s__uncultured_Clostridia_bacterium_g__norank_f__norank_o__Limnochordales	OTU3393	1	0	0	0	0	0	0	0	0	0	0	0	1
d__Bacteria	k__norank_d__Bacteria	p__Myxococcota	c__Polyangia	o__mle1-27	f__norank_o__mle1-27	g__norank_f__norank_o__mle1-27	s__unclassified_g__norank_f__norank_o__mle1-27	OTU2321	0	1	0	3	0	0	0	2	0	1	0	0	7
d__Bacteria	k__norank_d__Bacteria	p__Cyanobacteria	c__Sericytochromatia	o__norank_c__Sericytochromatia	f__norank_o__norank_c__Sericytochromatia	g__norank_f__norank_o__norank_c__Sericytochromatia	s__unclassified_g__norank_f__norank_o__norank_c__Sericytochromatia	OTU2970	1	1	0	0	0	2	0	0	0	0	0	0	4
d__Bacteria	k__norank_d__Bacteria	p__Patescibacteria	c__Saccharimonadia	o__Saccharimonadales	f__Saccharimonadaceae	g__TM7a	s__unclassified_g__TM7a	OTU1702	0	1	3	8	1	1	1	0	2	1	1	1	20
d__Bacteria	k__norank_d__Bacteria	p__unclassified_k__norank_d__Bacteria	c__unclassified_k__norank_d__Bacteria	o__unclassified_k__norank_d__Bacteria	f__unclassified_k__norank_d__Bacteria	g__unclassified_k__norank_d__Bacteria	s__unclassified_k__norank_d__Bacteria	OTU2105	0	0	0	1	0	1	0	0	1	0	0	0	3
d__Bacteria	k__norank_d__Bacteria	p__Chloroflexi	c__unclassified_p__Chloroflexi	o__unclassified_p__Chloroflexi	f__unclassified_p__Chloroflexi	g__unclassified_p__Chloroflexi	s__unclassified_p__Chloroflexi	OTU5013	2	1	0	0	0	1	4	2	0	1	1	1	13
d__Bacteria	k__norank_d__Bacteria	p__Planctomycetota	c__Planctomycetes	o__Gemmatales	f__Gemmataceae	g__Gemmata	s__uncultured_bacterium_g__Gemmata	OTU2241	0	1	0	2	0	0	0	0	0	0	0	0	3
d__Bacteria	k__norank_d__Bacteria	p__Chloroflexi	c__OLB14	o__norank_c__OLB14	f__norank_o__norank_c__OLB14	g__norank_f__norank_o__norank_c__OLB14	s__metagenome_g__norank_f__norank_o__norank_c__OLB14	OTU2893	56	53	49	44	51	84	63	49	43	44	51	42	629
d__Bacteria	k__norank_d__Bacteria	p__Proteobacteria	c__Alphaproteobacteria	o__Micropepsales	f__Micropepsaceae	g__norank_f__Micropepsaceae	s__metagenome_g__norank_f__Micropepsaceae	OTU3019	3	0	1	0	2	1	1	2	0	3	1	1	15
d__Bacteria	k__norank_d__Bacteria	p__Chloroflexi	c__Anaerolineae	o__SBR1031	f__A4b	g__norank_f__A4b	s__uncultured_bacterium_g__norank_f__A4b	OTU3780	3	2	3	1	6	5	8	6	1	4	5	2	46
d__Bacteria	k__norank_d__Bacteria	p__Acidobacteriota	c__Blastocatellia	o__Blastocatellales	f__Blastocatellaceae	g__Aridibacter	s__uncultured_bacterium_g__Aridibacter	OTU2670	1	4	0	1	1	2	3	0	1	0	1	2	16
d__Bacteria	k__norank_d__Bacteria	p__Chloroflexi	c__Anaerolineae	o__Caldilineales	f__Caldilineaceae	g__norank_f__Caldilineaceae	s__uncultured_Caldilineae_bacterium_g__norank_f__Caldilineaceae	OTU3150	2	1	2	2	1	2	0	1	1	1	1	5	19
d__Bacteria	k__norank_d__Bacteria	p__Actinobacteriota	c__Actinobacteria	o__Propionibacteriales	f__Nocardioidaceae	g__Nocardioides	s__uncultured_bacterium_g__Nocardioides	OTU4380	6	4	7	14	9	10	9	2	4	8	5	6	84
d__Bacteria	k__norank_d__Bacteria	p__Myxococcota	c__bacteriap25	o__norank_c__bacteriap25	f__norank_o__norank_c__bacteriap25	g__norank_f__norank_o__norank_c__bacteriap25	s__metagenome_g__norank_f__norank_o__norank_c__bacteriap25	OTU4450	3	3	0	3	3	1	13	8	17	14	10	11	86
d__Bacteria	k__norank_d__Bacteria	p__Proteobacteria	c__Gammaproteobacteria	o__unclassified_c__Gammaproteobacteria	f__unclassified_c__Gammaproteobacteria	g__unclassified_c__Gammaproteobacteria	s__unclassified_c__Gammaproteobacteria	OTU4038	0	2	2	2	3	0	9	4	7	6	1	3	39
d__Bacteria	k__norank_d__Bacteria	p__Firmicutes	c__Desulfotomaculia	o__Desulfotomaculales	f__Desulfallas-Sporotomaculum	g__norank_f__Desulfallas-Sporotomaculum	s__uncultured_bacterium_g__norank_f__Desulfallas-Sporotomaculum	OTU93	3	1	0	0	0	0	0	0	0	0	0	0	4
d__Bacteria	k__norank_d__Bacteria	p__Chloroflexi	c__Anaerolineae	o__SBR1031	f__norank_o__SBR1031	g__norank_f__norank_o__SBR1031	s__anaerobic_digester_metagenome_g__norank_f__norank_o__SBR1031	OTU1724	3	38	5	3	6	1	0	0	0	2	0	0	58
d__Bacteria	k__norank_d__Bacteria	p__Firmicutes	c__Clostridia	o__Clostridiales	f__Clostridiaceae	g__Clostridium_sensu_stricto_1	s__unclassified_g__Clostridium_sensu_stricto_1	OTU936	0	1	1	2	0	2	0	1	1	1	0	1	10
d__Bacteria	k__norank_d__Bacteria	p__Patescibacteria	c__Saccharimonadia	o__Saccharimonadales	f__LWQ8	g__norank_f__LWQ8	s__uncultured_bacterium_g__norank_f__LWQ8	OTU315	0	1	0	1	0	0	1	0	1	0	0	0	4
d__Bacteria	k__norank_d__Bacteria	p__Patescibacteria	c__Gracilibacteria	o__Candidatus_Peribacteria	f__norank_o__Candidatus_Peribacteria	g__norank_f__norank_o__Candidatus_Peribacteria	s__uncultured_bacterium_g__norank_f__norank_o__Candidatus_Peribacteria	OTU4975	0	0	0	0	0	0	0	0	1	2	2	0	5
d__Bacteria	k__norank_d__Bacteria	p__Chloroflexi	c__Anaerolineae	o__Caldilineales	f__Caldilineaceae	g__norank_f__Caldilineaceae	s__uncultured_bacterium_g__norank_f__Caldilineaceae	OTU5547	1	0	0	0	0	0	0	0	0	0	0	0	1
d__Bacteria	k__norank_d__Bacteria	p__Actinobacteriota	c__Actinobacteria	o__Corynebacteriales	f__Tsukamurellaceae	g__Tsukamurella	s__unclassified_g__Tsukamurella	OTU2425	0	0	0	0	2	0	0	0	0	0	0	0	2
d__Bacteria	k__norank_d__Bacteria	p__Planctomycetota	c__Phycisphaerae	o__Phycisphaerales	f__Phycisphaeraceae	g__SM1A02	s__uncultured_bacterium_g__SM1A02	OTU247	0	0	0	0	0	0	0	0	1	0	0	0	1
d__Bacteria	k__norank_d__Bacteria	p__Proteobacteria	c__Alphaproteobacteria	o__Micavibrionales	f__Micavibrionaceae	g__norank_f__Micavibrionaceae	s__unclassified_g__norank_f__Micavibrionaceae	OTU647	0	0	1	0	0	0	0	0	0	1	0	1	3
d__Bacteria	k__norank_d__Bacteria	p__Chloroflexi	c__OLB14	o__norank_c__OLB14	f__norank_o__norank_c__OLB14	g__norank_f__norank_o__norank_c__OLB14	s__uncultured_bacterium_g__norank_f__norank_o__norank_c__OLB14	OTU1620	4	5	7	3	4	7	8	4	6	6	6	7	67
d__Bacteria	k__norank_d__Bacteria	p__Acidobacteriota	c__Holophagae	o__Subgroup_7	f__norank_o__Subgroup_7	g__norank_f__norank_o__Subgroup_7	s__uncultured_Acidobacteria_bacterium_g__norank_f__norank_o__Subgroup_7	OTU3611	4	5	5	1	0	2	8	7	6	4	5	7	54
d__Bacteria	k__norank_d__Bacteria	p__Bacteroidota	c__Bacteroidia	o__Chitinophagales	f__Chitinophagaceae	g__Chitinophaga	s__unclassified_g__Chitinophaga	OTU3447	13	9	6	7	8	11	2	3	3	3	6	2	73
d__Bacteria	k__norank_d__Bacteria	p__Proteobacteria	c__Alphaproteobacteria	o__Caulobacterales	f__Hyphomonadaceae	g__SWB02	s__metagenome_g__SWB02	OTU3548	0	1	1	0	2	1	2	0	0	1	1	5	14
d__Bacteria	k__norank_d__Bacteria	p__Gemmatimonadota	c__Gemmatimonadetes	o__Gemmatimonadales	f__Gemmatimonadaceae	g__Roseisolibacter	s__unclassified_g__Roseisolibacter	OTU1347	2	3	3	4	0	2	2	3	1	6	11	13	50
d__Bacteria	k__norank_d__Bacteria	p__unclassified_k__norank_d__Bacteria	c__unclassified_k__norank_d__Bacteria	o__unclassified_k__norank_d__Bacteria	f__unclassified_k__norank_d__Bacteria	g__unclassified_k__norank_d__Bacteria	s__unclassified_k__norank_d__Bacteria	OTU380	0	0	0	0	0	0	0	0	0	0	1	1	2
d__Bacteria	k__norank_d__Bacteria	p__Proteobacteria	c__Gammaproteobacteria	o__Burkholderiales	f__Nitrosomonadaceae	g__Nitrosomonas	s__Nitrosomonas_communis	OTU4291	11	18	14	8	8	6	10	12	12	10	15	8	132
d__Bacteria	k__norank_d__Bacteria	p__Planctomycetota	c__Pla4_lineage	o__norank_c__Pla4_lineage	f__norank_o__norank_c__Pla4_lineage	g__norank_f__norank_o__norank_c__Pla4_lineage	s__uncultured_bacterium_g__norank_f__norank_o__norank_c__Pla4_lineage	OTU3199	1	1	0	0	1	1	0	0	0	0	0	0	4
d__Bacteria	k__norank_d__Bacteria	p__Acidobacteriota	c__Vicinamibacteria	o__Vicinamibacterales	f__norank_o__Vicinamibacterales	g__norank_f__norank_o__Vicinamibacterales	s__unclassified_g__norank_f__norank_o__Vicinamibacterales	OTU3930	4	4	4	0	0	3	3	6	5	2	4	5	40
d__Bacteria	k__norank_d__Bacteria	p__Actinobacteriota	c__Thermoleophilia	o__Solirubrobacterales	f__67-14	g__norank_f__67-14	s__uncultured_bacterium_g__norank_f__67-14	OTU4313	15	7	20	22	25	21	27	30	21	32	34	24	278
d__Bacteria	k__norank_d__Bacteria	p__Planctomycetota	c__Planctomycetes	o__Pirellulales	f__Pirellulaceae	g__norank_f__Pirellulaceae	s__unclassified_g__norank_f__Pirellulaceae	OTU2989	1	1	3	0	2	0	0	0	2	1	0	4	14
d__Bacteria	k__norank_d__Bacteria	p__Actinobacteriota	c__Actinobacteria	o__Micromonosporales	f__Micromonosporaceae	g__Actinorhabdospora	s__Actinorhabdospora_filicis	OTU962	0	1	1	0	0	0	0	0	0	0	0	0	2
d__Bacteria	k__norank_d__Bacteria	p__Bacteroidota	c__Rhodothermia	o__Rhodothermales	f__Rhodothermaceae	g__norank_f__Rhodothermaceae	s__unclassified_g__norank_f__Rhodothermaceae	OTU1827	1	2	5	3	5	1	0	0	0	4	5	0	26
d__Bacteria	k__norank_d__Bacteria	p__Gemmatimonadota	c__Gemmatimonadetes	o__Gemmatimonadales	f__Gemmatimonadaceae	g__norank_f__Gemmatimonadaceae	s__uncultured_bacterium_g__norank_f__Gemmatimonadaceae	OTU3306	0	0	0	0	0	0	2	0	0	1	0	1	4
d__Bacteria	k__norank_d__Bacteria	p__Bdellovibrionota	c__Bdellovibrionia	o__Bdellovibrionales	f__Bdellovibrionaceae	g__Bdellovibrio	s__uncultured_bacterium_g__Bdellovibrio	OTU690	0	5	4	8	3	2	3	8	4	3	3	2	45
d__Bacteria	k__norank_d__Bacteria	p__Chloroflexi	c__Chloroflexia	o__Thermomicrobiales	f__AKYG1722	g__norank_f__AKYG1722	s__unclassified_g__norank_f__AKYG1722	OTU4329	19	17	17	13	16	14	17	12	9	22	12	14	182
d__Bacteria	k__norank_d__Bacteria	p__Firmicutes	c__unclassified_p__Firmicutes	o__unclassified_p__Firmicutes	f__unclassified_p__Firmicutes	g__unclassified_p__Firmicutes	s__unclassified_p__Firmicutes	OTU3396	1	0	1	0	1	0	1	1	0	0	1	0	6
d__Bacteria	k__norank_d__Bacteria	p__Armatimonadota	c__norank_p__Armatimonadota	o__norank_c__norank_p__Armatimonadota	f__norank_o__norank_c__norank_p__Armatimonadota	g__norank_f__norank_o__norank_c__norank_p__Armatimonadota	s__uncultured_bacterium_g__norank_f__norank_o__norank_c__norank_p__Armatimonadota	OTU4628	1	0	1	3	2	0	0	0	0	0	0	1	8
d__Bacteria	k__norank_d__Bacteria	p__Chloroflexi	c__TK10	o__norank_c__TK10	f__norank_o__norank_c__TK10	g__norank_f__norank_o__norank_c__TK10	s__uncultured_bacterium_g__norank_f__norank_o__norank_c__TK10	OTU1681	4	0	6	3	2	4	0	6	4	1	3	2	35
d__Bacteria	k__norank_d__Bacteria	p__Chloroflexi	c__Anaerolineae	o__Ardenticatenales	f__norank_o__Ardenticatenales	g__norank_f__norank_o__Ardenticatenales	s__uncultured_prokaryote_g__norank_f__norank_o__Ardenticatenales	OTU5090	0	0	0	0	1	1	0	0	0	1	1	0	4
d__Bacteria	k__norank_d__Bacteria	p__Myxococcota	c__Polyangia	o__Polyangiales	f__Polyangiaceae	g__Pajaroellobacter	s__unclassified_g__Pajaroellobacter	OTU1135	5	7	7	6	10	6	4	10	5	4	6	6	76
d__Bacteria	k__norank_d__Bacteria	p__Bdellovibrionota	c__Bdellovibrionia	o__Bdellovibrionales	f__Bdellovibrionaceae	g__Bdellovibrio	s__uncultured_bacterium_g__Bdellovibrio	OTU2188	0	2	1	3	0	0	0	1	3	2	1	0	13
d__Bacteria	k__norank_d__Bacteria	p__Chloroflexi	c__Chloroflexia	o__Thermomicrobiales	f__JG30-KF-CM45	g__norank_f__JG30-KF-CM45	s__metagenome_g__norank_f__JG30-KF-CM45	OTU2187	2	1	2	2	0	2	0	1	3	1	1	0	15
d__Bacteria	k__norank_d__Bacteria	p__Planctomycetota	c__Planctomycetes	o__Pirellulales	f__Pirellulaceae	g__norank_f__Pirellulaceae	s__unclassified_g__norank_f__Pirellulaceae	OTU898	0	0	1	0	1	0	0	2	1	1	2	0	8
d__Bacteria	k__norank_d__Bacteria	p__Gemmatimonadota	c__Longimicrobia	o__Longimicrobiales	f__Longimicrobiaceae	g__norank_f__Longimicrobiaceae	s__unclassified_g__norank_f__Longimicrobiaceae	OTU4564	0	0	0	0	2	0	1	2	0	2	0	1	8
d__Bacteria	k__norank_d__Bacteria	p__Chloroflexi	c__Chloroflexia	o__Chloroflexales	f__Chloroflexaceae	g__FFCH7168	s__uncultured_bacterium_g__FFCH7168	OTU3063	0	0	0	0	1	0	0	0	1	1	0	0	3
d__Bacteria	k__norank_d__Bacteria	p__Sumerlaeota	c__Sumerlaeia	o__Sumerlaeales	f__Sumerlaeaceae	g__Sumerlaea	s__unclassified_g__Sumerlaea	OTU175	4	4	3	3	10	6	0	2	1	2	2	3	40
d__Bacteria	k__norank_d__Bacteria	p__Planctomycetota	c__Planctomycetes	o__Gemmatales	f__Gemmataceae	g__norank_f__Gemmataceae	s__unclassified_g__norank_f__Gemmataceae	OTU5325	0	0	0	0	0	0	0	0	0	0	1	1	2
d__Bacteria	k__norank_d__Bacteria	p__Verrucomicrobiota	c__Chlamydiae	o__Chlamydiales	f__Parachlamydiaceae	g__unclassified_f__Parachlamydiaceae	s__unclassified_f__Parachlamydiaceae	OTU810	1	0	1	0	0	1	0	0	0	1	0	0	4
d__Bacteria	k__norank_d__Bacteria	p__Chloroflexi	c__Ktedonobacteria	o__C0119	f__norank_o__C0119	g__norank_f__norank_o__C0119	s__uncultured_soil_bacterium_g__norank_f__norank_o__C0119	OTU5609	26	24	24	14	16	8	36	59	64	32	37	54	394
d__Bacteria	k__norank_d__Bacteria	p__Actinobacteriota	c__Acidimicrobiia	o__Microtrichales	f__Microtrichaceae	g__IMCC26207	s__unclassified_g__IMCC26207	OTU4656	0	1	4	1	0	1	1	1	1	2	2	0	14
d__Bacteria	k__norank_d__Bacteria	p__Gemmatimonadota	c__Gemmatimonadetes	o__Gemmatimonadales	f__Gemmatimonadaceae	g__Roseisolibacter	s__uncultured_soil_bacterium_g__Roseisolibacter	OTU2481	0	1	0	1	3	1	1	0	0	0	0	1	8
d__Bacteria	k__norank_d__Bacteria	p__Proteobacteria	c__unclassified_p__Proteobacteria	o__unclassified_p__Proteobacteria	f__unclassified_p__Proteobacteria	g__unclassified_p__Proteobacteria	s__unclassified_p__Proteobacteria	OTU3065	0	1	1	0	1	0	0	0	0	0	0	0	3
d__Bacteria	k__norank_d__Bacteria	p__Proteobacteria	c__Alphaproteobacteria	o__Tistrellales	f__Geminicoccaceae	g__norank_f__Geminicoccaceae	s__uncultured_bacterium_g__norank_f__Geminicoccaceae	OTU5482	24	19	34	31	18	34	29	36	42	40	33	44	384
d__Bacteria	k__norank_d__Bacteria	p__Planctomycetota	c__OM190	o__norank_c__OM190	f__norank_o__norank_c__OM190	g__norank_f__norank_o__norank_c__OM190	s__uncultured_Planctomyces_sp._g__norank	OTU4542	1	0	0	0	0	0	0	0	0	0	1	0	2
d__Bacteria	k__norank_d__Bacteria	p__Chloroflexi	c__Anaerolineae	o__SBR1031	f__norank_o__SBR1031	g__norank_f__norank_o__SBR1031	s__uncultured_soil_bacterium_g__norank_f__norank_o__SBR1031	OTU2158	0	1	0	1	0	0	0	1	0	0	2	0	5
d__Bacteria	k__norank_d__Bacteria	p__Actinobacteriota	c__Thermoleophilia	o__Gaiellales	f__norank_o__Gaiellales	g__norank_f__norank_o__Gaiellales	s__unclassified_g__norank_f__norank_o__Gaiellales	OTU1165	3	8	6	5	2	7	2	7	7	5	4	5	61
d__Bacteria	k__norank_d__Bacteria	p__Entotheonellaeota	c__Entotheonellia	o__Entotheonellales	f__Entotheonellaceae	g__norank_f__Entotheonellaceae	s__uncultured_bacterium_g__norank_f__Entotheonellaceae	OTU4163	0	0	0	0	1	1	3	2	4	0	2	0	13
d__Bacteria	k__norank_d__Bacteria	p__Chloroflexi	c__Anaerolineae	o__SBR1031	f__A4b	g__norank_f__A4b	s__unclassified_g__norank_f__A4b	OTU1653	2	3	5	5	1	6	0	4	2	3	4	2	37
d__Bacteria	k__norank_d__Bacteria	p__Bdellovibrionota	c__Bdellovibrionia	o__Bdellovibrionales	f__Bdellovibrionaceae	g__Bdellovibrio	s__uncultured_bacterium_g__Bdellovibrio	OTU4676	1	0	1	0	0	1	0	1	0	0	0	0	4
d__Bacteria	k__norank_d__Bacteria	p__Gemmatimonadota	c__BD2-11_terrestrial_group	o__norank_c__BD2-11_terrestrial_group	f__norank_o__norank_c__BD2-11_terrestrial_group	g__norank_f__norank_o__norank_c__BD2-11_terrestrial_group	s__metagenome_g__norank_f__norank_o__norank_c__BD2-11_terrestrial_group	OTU4312	2	6	9	5	4	4	13	12	6	9	10	7	87
d__Bacteria	k__norank_d__Bacteria	p__Actinobacteriota	c__Thermoleophilia	o__Solirubrobacterales	f__67-14	g__norank_f__67-14	s__uncultured_actinobacterium_g__norank_f__67-14	OTU5131	0	0	0	1	0	1	2	1	0	0	1	1	7
d__Bacteria	k__norank_d__Bacteria	p__Patescibacteria	c__unclassified_p__Patescibacteria	o__unclassified_p__Patescibacteria	f__unclassified_p__Patescibacteria	g__unclassified_p__Patescibacteria	s__unclassified_p__Patescibacteria	OTU5583	1	0	0	0	0	0	0	1	1	0	1	4	8
d__Bacteria	k__norank_d__Bacteria	p__Bacteroidota	c__Bacteroidia	o__Cytophagales	f__Cytophagaceae	g__Sporocytophaga	s__unclassified_g__Sporocytophaga	OTU187	0	1	1	0	0	0	0	0	1	0	1	0	4
d__Bacteria	k__norank_d__Bacteria	p__Proteobacteria	c__Alphaproteobacteria	o__Sphingomonadales	f__Sphingomonadaceae	g__unclassified_f__Sphingomonadaceae	s__unclassified_f__Sphingomonadaceae	OTU4415	6	4	7	35	28	38	3	0	1	11	5	8	146
d__Bacteria	k__norank_d__Bacteria	p__Chloroflexi	c__Anaerolineae	o__SBR1031	f__norank_o__SBR1031	g__norank_f__norank_o__SBR1031	s__uncultured_soil_bacterium_g__norank_f__norank_o__SBR1031	OTU2306	2	0	0	3	1	0	1	2	0	0	1	0	10
d__Bacteria	k__norank_d__Bacteria	p__Bacteroidota	c__Bacteroidia	o__Cytophagales	f__Cytophagaceae	g__Sporocytophaga	s__unclassified_g__Sporocytophaga	OTU188	2	2	2	1	1	1	1	1	0	0	0	1	12
d__Bacteria	k__norank_d__Bacteria	p__Firmicutes	c__Bacilli	o__unclassified_c__Bacilli	f__unclassified_c__Bacilli	g__unclassified_c__Bacilli	s__unclassified_c__Bacilli	OTU5419	0	0	0	0	0	0	0	0	0	0	1	0	1
d__Bacteria	k__norank_d__Bacteria	p__Proteobacteria	c__Gammaproteobacteria	o__Gammaproteobacteria_Incertae_Sedis	f__unclassified_o__Gammaproteobacteria_Incertae_Sedis	g__Candidatus_Berkiella	s__unclassified_g__Candidatus_Berkiella	OTU2618	0	1	0	0	2	0	0	0	1	1	0	0	5
d__Bacteria	k__norank_d__Bacteria	p__Dependentiae	c__Babeliae	o__Babeliales	f__unclassified_o__Babeliales	g__unclassified_o__Babeliales	s__unclassified_o__Babeliales	OTU3182	0	0	1	0	0	1	0	0	1	1	0	0	4
d__Bacteria	k__norank_d__Bacteria	p__Planctomycetota	c__Planctomycetes	o__Gemmatales	f__Gemmataceae	g__Fimbriiglobus	s__uncultured_bacterium_g__Fimbriiglobus	OTU3024	2	0	0	3	2	0	2	4	2	0	1	3	19
d__Bacteria	k__norank_d__Bacteria	p__Patescibacteria	c__norank_p__Patescibacteria	o__norank_c__norank_p__Patescibacteria	f__norank_o__norank_c__norank_p__Patescibacteria	g__norank_f__norank_o__norank_c__norank_p__Patescibacteria	s__uncultured_bacterium_g__norank_f__norank_o__norank_c__norank_p__Patescibacteria	OTU457	0	1	0	0	1	0	0	0	0	0	0	0	2
d__Bacteria	k__norank_d__Bacteria	p__Planctomycetota	c__Planctomycetes	o__Gemmatales	f__Gemmataceae	g__norank_f__Gemmataceae	s__unclassified_g__norank_f__Gemmataceae	OTU1325	3	1	1	6	1	0	1	2	9	3	5	5	37
d__Bacteria	k__norank_d__Bacteria	p__Proteobacteria	c__Gammaproteobacteria	o__Coxiellales	f__Coxiellaceae	g__Coxiella	s__unclassified_g__Coxiella	OTU3741	0	0	0	0	1	0	2	0	0	0	0	0	3
d__Bacteria	k__norank_d__Bacteria	p__Actinobacteriota	c__Acidimicrobiia	o__norank_c__Acidimicrobiia	f__norank_o__norank_c__Acidimicrobiia	g__norank_f__norank_o__norank_c__Acidimicrobiia	s__metagenome_g__norank_f__norank_o__norank_c__Acidimicrobiia	OTU4661	1	3	1	0	3	7	0	2	4	5	1	1	28
d__Bacteria	k__norank_d__Bacteria	p__Firmicutes	c__Clostridia	o__Proteinivoracales	f__norank_o__Proteinivoracales	g__norank_f__norank_o__Proteinivoracales	s__uncultured_Clostridiisalibacter_sp._g__norank	OTU3126	1	0	2	1	0	1	0	1	0	0	0	0	6
d__Bacteria	k__norank_d__Bacteria	p__Gemmatimonadota	c__Gemmatimonadetes	o__Gemmatimonadales	f__Gemmatimonadaceae	g__norank_f__Gemmatimonadaceae	s__uncultured_bacterium_g__norank_f__Gemmatimonadaceae	OTU479	0	0	0	0	0	0	0	1	0	0	1	1	3
d__Bacteria	k__norank_d__Bacteria	p__Actinobacteriota	c__Actinobacteria	o__Corynebacteriales	f__Mycobacteriaceae	g__Mycobacterium	s__unclassified_g__Mycobacterium	OTU3485	2	3	2	0	1	1	20	1	4	3	4	1	42
d__Bacteria	k__norank_d__Bacteria	p__Proteobacteria	c__Alphaproteobacteria	o__unclassified_c__Alphaproteobacteria	f__unclassified_c__Alphaproteobacteria	g__unclassified_c__Alphaproteobacteria	s__unclassified_c__Alphaproteobacteria	OTU891	2	2	3	0	2	1	0	0	0	0	2	1	13
d__Bacteria	k__norank_d__Bacteria	p__Actinobacteriota	c__Actinobacteria	o__Propionibacteriales	f__Nocardioidaceae	g__Nocardioides	s__unclassified_g__Nocardioides	OTU79	0	0	0	0	0	0	0	0	0	0	0	1	1
d__Bacteria	k__norank_d__Bacteria	p__Firmicutes	c__Bacilli	o__Paenibacillales	f__Paenibacillaceae	g__unclassified_f__Paenibacillaceae	s__unclassified_f__Paenibacillaceae	OTU5312	0	0	0	1	0	0	0	1	0	0	1	0	3
d__Bacteria	k__norank_d__Bacteria	p__Actinobacteriota	c__Acidimicrobiia	o__Microtrichales	f__Iamiaceae	g__Iamia	s__metagenome_g__Iamia	OTU478	0	1	0	0	1	0	0	1	0	1	2	0	6
d__Bacteria	k__norank_d__Bacteria	p__Dependentiae	c__Babeliae	o__Babeliales	f__norank_o__Babeliales	g__norank_f__norank_o__Babeliales	s__uncultured_Candidatus_Dependentiae_bacterium_g__norank_f__norank	OTU537	1	1	0	0	0	0	0	3	3	1	0	2	11
d__Bacteria	k__norank_d__Bacteria	p__Chloroflexi	c__Anaerolineae	o__SBR1031	f__A4b	g__norank_f__A4b	s__unclassified_g__norank_f__A4b	OTU4127	1	3	2	0	3	6	4	0	0	2	2	2	25
d__Bacteria	k__norank_d__Bacteria	p__Gemmatimonadota	c__Longimicrobia	o__Longimicrobiales	f__Longimicrobiaceae	g__norank_f__Longimicrobiaceae	s__unclassified_g__norank_f__Longimicrobiaceae	OTU3134	0	2	0	2	1	0	0	1	0	0	1	0	7
d__Bacteria	k__norank_d__Bacteria	p__Cyanobacteria	c__Cyanobacteriia	o__Oxyphotobacteria_Incertae_Sedis	f__unclassified_o__Oxyphotobacteria_Incertae_Sedis	g__Leptolyngbya_ANT.L52.2	s__unclassified_g__Leptolyngbya_ANT.L52.2	OTU4206	21	11	8	13	13	11	15	39	17	3	2	11	164
d__Bacteria	k__norank_d__Bacteria	p__Proteobacteria	c__Alphaproteobacteria	o__unclassified_c__Alphaproteobacteria	f__unclassified_c__Alphaproteobacteria	g__unclassified_c__Alphaproteobacteria	s__unclassified_c__Alphaproteobacteria	OTU1616	0	4	2	2	2	13	0	3	2	2	1	3	34
d__Bacteria	k__norank_d__Bacteria	p__Chloroflexi	c__Anaerolineae	o__Caldilineales	f__Caldilineaceae	g__norank_f__Caldilineaceae	s__uncultured_bacterium_g__norank_f__Caldilineaceae	OTU934	0	2	1	1	3	0	0	1	2	0	0	0	10
d__Bacteria	k__norank_d__Bacteria	p__Proteobacteria	c__Gammaproteobacteria	o__Pseudomonadales	f__Moraxellaceae	g__Permianibacter	s__uncultured_bacterium_g__Permianibacter	OTU945	0	1	1	0	0	0	0	0	0	0	0	0	2
d__Bacteria	k__norank_d__Bacteria	p__Armatimonadota	c__Fimbriimonadia	o__Fimbriimonadales	f__Fimbriimonadaceae	g__norank_f__Fimbriimonadaceae	s__uncultured_bacterium_g__norank_f__Fimbriimonadaceae	OTU290	2	3	2	0	3	1	2	2	4	10	6	3	38
d__Bacteria	k__norank_d__Bacteria	p__Acidobacteriota	c__Subgroup_5	o__norank_c__Subgroup_5	f__norank_o__norank_c__Subgroup_5	g__norank_f__norank_o__norank_c__Subgroup_5	s__uncultured_Acidobacteria_bacterium_g__norank_f__norank_o__norank_c__Subgroup_5	OTU705	5	3	3	3	4	4	11	6	7	3	4	8	61
d__Bacteria	k__norank_d__Bacteria	p__Patescibacteria	c__Parcubacteria	o__norank_c__Parcubacteria	f__norank_o__norank_c__Parcubacteria	g__norank_f__norank_o__norank_c__Parcubacteria	s__uncultured_bacterium_g__norank_f__norank_o__norank_c__Parcubacteria	OTU5061	0	0	0	0	0	1	0	1	0	1	0	0	3
d__Bacteria	k__norank_d__Bacteria	p__Verrucomicrobiota	c__Verrucomicrobiae	o__Pedosphaerales	f__Pedosphaeraceae	g__unclassified_f__Pedosphaeraceae	s__unclassified_f__Pedosphaeraceae	OTU2543	9	8	7	8	2	5	6	11	3	0	2	4	65
d__Bacteria	k__norank_d__Bacteria	p__Proteobacteria	c__Alphaproteobacteria	o__Rhizobiales	f__Rhizobiales_Incertae_Sedis	g__Bauldia	s__uncultured_bacterium_g__Bauldia	OTU4713	4	2	10	6	8	5	7	8	3	5	2	3	63
d__Bacteria	k__norank_d__Bacteria	p__Bdellovibrionota	c__Bdellovibrionia	o__Bdellovibrionales	f__Bdellovibrionaceae	g__OM27_clade	s__unclassified_g__OM27_clade	OTU1611	1	3	1	0	2	0	1	0	2	0	0	1	11
d__Bacteria	k__norank_d__Bacteria	p__Chloroflexi	c__Anaerolineae	o__SBR1031	f__A4b	g__norank_f__A4b	s__uncultured_sludge_bacterium_H8	OTU4049	1	1	6	2	4	4	1	1	1	0	3	3	27
d__Bacteria	k__norank_d__Bacteria	p__Planctomycetota	c__Pla4_lineage	o__norank_c__Pla4_lineage	f__norank_o__norank_c__Pla4_lineage	g__norank_f__norank_o__norank_c__Pla4_lineage	s__uncultured_bacterium_g__norank_f__norank_o__norank_c__Pla4_lineage	OTU25	1	0	0	0	1	0	0	0	0	0	0	0	2
d__Bacteria	k__norank_d__Bacteria	p__Chloroflexi	c__Anaerolineae	o__Ardenticatenales	f__norank_o__Ardenticatenales	g__norank_f__norank_o__Ardenticatenales	s__unclassified_g__norank_f__norank_o__Ardenticatenales	OTU3330	1	0	0	0	0	0	2	0	1	1	0	1	6
d__Bacteria	k__norank_d__Bacteria	p__Actinobacteriota	c__MB-A2-108	o__norank_c__MB-A2-108	f__norank_o__norank_c__MB-A2-108	g__norank_f__norank_o__norank_c__MB-A2-108	s__uncultured_bacterium_g__norank_f__norank_o__norank_c__MB-A2-108	OTU3229	65	46	46	65	53	52	56	97	82	27	56	58	703
d__Bacteria	k__norank_d__Bacteria	p__Firmicutes	c__Bacilli	o__unclassified_c__Bacilli	f__unclassified_c__Bacilli	g__unclassified_c__Bacilli	s__unclassified_c__Bacilli	OTU4827	1	0	0	0	0	0	0	1	0	1	0	0	3
d__Bacteria	k__norank_d__Bacteria	p__Chloroflexi	c__Chloroflexia	o__Thermomicrobiales	f__JG30-KF-CM45	g__norank_f__JG30-KF-CM45	s__unclassified_g__norank_f__JG30-KF-CM45	OTU938	1	1	3	7	2	5	0	1	0	0	1	0	21
d__Bacteria	k__norank_d__Bacteria	p__Firmicutes	c__Bacilli	o__Alicyclobacillales	f__Alicyclobacillaceae	g__Tumebacillus	s__uncultured_bacterium_g__Tumebacillus	OTU5233	0	0	0	0	0	0	1	0	1	1	0	0	3
d__Bacteria	k__norank_d__Bacteria	p__Proteobacteria	c__Gammaproteobacteria	o__Acidiferrobacterales	f__Acidiferrobacteraceae	g__Sulfurifustis	s__uncultured_bacterium_g__Sulfurifustis	OTU3535	0	1	1	0	5	0	2	0	0	0	0	0	9
d__Bacteria	k__norank_d__Bacteria	p__Actinobacteriota	c__Actinobacteria	o__Euzebyales	f__Euzebyaceae	g__norank_f__Euzebyaceae	s__unclassified_g__norank_f__Euzebyaceae	OTU2924	0	1	0	0	3	3	0	1	0	1	0	1	10
d__Bacteria	k__norank_d__Bacteria	p__Chloroflexi	c__Chloroflexia	o__Thermomicrobiales	f__JG30-KF-CM45	g__norank_f__JG30-KF-CM45	s__unclassified_g__norank_f__JG30-KF-CM45	OTU4257	27	18	27	23	29	23	29	39	29	26	21	19	310
d__Bacteria	k__norank_d__Bacteria	p__Planctomycetota	c__Planctomycetes	o__Pirellulales	f__Pirellulaceae	g__norank_f__Pirellulaceae	s__unclassified_g__norank_f__Pirellulaceae	OTU1987	12	9	13	11	8	5	6	10	12	7	7	13	113
d__Bacteria	k__norank_d__Bacteria	p__Proteobacteria	c__Gammaproteobacteria	o__Diplorickettsiales	f__Diplorickettsiaceae	g__Aquicella	s__uncultured_bacterium_g__Aquicella	OTU5431	0	0	0	0	0	0	0	0	0	1	1	1	3
d__Bacteria	k__norank_d__Bacteria	p__Actinobacteriota	c__Actinobacteria	o__Nitriliruptorales	f__Nitriliruptoraceae	g__norank_f__Nitriliruptoraceae	s__uncultured_Actinobacteridae_bacterium_g__norank_f__Nitriliruptoraceae	OTU2153	4	2	0	1	2	4	0	0	1	1	3	3	21
d__Bacteria	k__norank_d__Bacteria	p__Chloroflexi	c__Anaerolineae	o__SBR1031	f__norank_o__SBR1031	g__norank_f__norank_o__SBR1031	s__uncultured_soil_bacterium_g__norank_f__norank_o__SBR1031	OTU3948	4	5	9	7	2	10	9	9	2	5	8	6	76
d__Bacteria	k__norank_d__Bacteria	p__Chloroflexi	c__TK10	o__norank_c__TK10	f__norank_o__norank_c__TK10	g__norank_f__norank_o__norank_c__TK10	s__unclassified_g__norank_f__norank_o__norank_c__TK10	OTU2379	1	0	3	2	0	3	0	1	1	4	0	1	16
d__Bacteria	k__norank_d__Bacteria	p__Proteobacteria	c__Gammaproteobacteria	o__unclassified_c__Gammaproteobacteria	f__unclassified_c__Gammaproteobacteria	g__unclassified_c__Gammaproteobacteria	s__unclassified_c__Gammaproteobacteria	OTU5245	0	0	0	0	0	0	0	0	0	1	0	1	2
d__Bacteria	k__norank_d__Bacteria	p__Planctomycetota	c__Planctomycetes	o__Planctomycetales	f__unclassified_o__Planctomycetales	g__unclassified_o__Planctomycetales	s__unclassified_o__Planctomycetales	OTU2910	1	1	1	1	2	1	0	3	1	1	3	2	17
d__Bacteria	k__norank_d__Bacteria	p__Patescibacteria	c__Microgenomatia	o__Candidatus_Woykebacteria	f__norank_o__Candidatus_Woykebacteria	g__norank_f__norank_o__Candidatus_Woykebacteria	s__uncultured_Microgenomates_group_bacterium_g__norank_f__norank_o__Candidatus_Woykebacteria	OTU1154	3	0	1	3	2	0	2	4	4	2	1	3	25
d__Bacteria	k__norank_d__Bacteria	p__Proteobacteria	c__Alphaproteobacteria	o__Ferrovibrionales	f__Ferrovibrionaceae	g__Ferrovibrio	s__uncultured_bacterium_g__Ferrovibrio	OTU3023	0	0	0	1	2	1	1	2	0	1	1	1	10
d__Bacteria	k__norank_d__Bacteria	p__Planctomycetota	c__Phycisphaerae	o__Phycisphaerales	f__Phycisphaeraceae	g__SM1A02	s__uncultured_bacterium_g__SM1A02	OTU3549	0	0	1	0	0	0	1	1	0	1	0	0	4
d__Bacteria	k__norank_d__Bacteria	p__Patescibacteria	c__Microgenomatia	o__Candidatus_Woykebacteria	f__norank_o__Candidatus_Woykebacteria	g__norank_f__norank_o__Candidatus_Woykebacteria	s__uncultured_Microgenomates_group_bacterium_g__norank_f__norank_o__Candidatus_Woykebacteria	OTU1896	1	2	2	0	0	2	1	1	0	0	0	0	9
d__Bacteria	k__norank_d__Bacteria	p__Chloroflexi	c__Chloroflexia	o__Chloroflexales	f__Roseiflexaceae	g__norank_f__Roseiflexaceae	s__unclassified_g__norank_f__Roseiflexaceae	OTU2385	4	2	1	2	4	8	0	3	4	4	3	0	35
d__Bacteria	k__norank_d__Bacteria	p__Proteobacteria	c__Alphaproteobacteria	o__Caulobacterales	f__Hyphomonadaceae	g__SWB02	s__uncultured_bacterium_g__SWB02	OTU947	13	17	21	16	25	15	21	14	25	19	15	17	218
d__Bacteria	k__norank_d__Bacteria	p__Planctomycetota	c__Phycisphaerae	o__Phycisphaerales	f__Phycisphaeraceae	g__SM1A02	s__unclassified_g__SM1A02	OTU1318	2	0	3	2	1	1	1	0	0	2	1	1	14
d__Bacteria	k__norank_d__Bacteria	p__Proteobacteria	c__Alphaproteobacteria	o__Rhodospirillales	f__norank_o__Rhodospirillales	g__norank_f__norank_o__Rhodospirillales	s__unclassified_g__norank_f__norank_o__Rhodospirillales	OTU5607	0	0	0	0	0	0	0	0	0	0	1	1	2
d__Bacteria	k__norank_d__Bacteria	p__Planctomycetota	c__Planctomycetes	o__Isosphaerales	f__Isosphaeraceae	g__norank_f__Isosphaeraceae	s__uncultured_Planctomycetales_bacterium_g__norank_f__Isosphaeraceae	OTU5513	5	3	3	4	3	6	2	5	2	1	4	5	43
d__Bacteria	k__norank_d__Bacteria	p__Gemmatimonadota	c__S0134_terrestrial_group	o__norank_c__S0134_terrestrial_group	f__norank_o__norank_c__S0134_terrestrial_group	g__norank_f__norank_o__norank_c__S0134_terrestrial_group	s__uncultured_Gemmatimonadetes_bacterium_g__norank_f__norank_o__norank_c__S0134_terrestrial_group	OTU4598	14	12	17	8	9	15	24	27	14	23	18	19	200
d__Bacteria	k__norank_d__Bacteria	p__Planctomycetota	c__Phycisphaerae	o__Phycisphaerales	f__Phycisphaeraceae	g__AKYG587	s__uncultured_planctomycete_g__AKYG587	OTU2826	3	3	4	0	5	1	0	1	1	1	1	2	22
d__Bacteria	k__norank_d__Bacteria	p__Planctomycetota	c__Planctomycetes	o__Planctomycetales	f__Rubinisphaeraceae	g__Planctomicrobium	s__uncultured_bacterium_g__Planctomicrobium	OTU2045	0	0	0	1	0	0	1	0	0	1	0	0	3
d__Bacteria	k__norank_d__Bacteria	p__Cyanobacteria	c__Vampirivibrionia	o__Obscuribacterales	f__Obscuribacteraceae	g__norank_f__Obscuribacteraceae	s__unclassified_g__norank_f__Obscuribacteraceae	OTU1141	0	0	1	1	1	0	0	0	0	0	0	1	4
d__Bacteria	k__norank_d__Bacteria	p__Bdellovibrionota	c__Oligoflexia	o__0319-6G20	f__norank_o__0319-6G20	g__norank_f__norank_o__0319-6G20	s__metagenome_g__norank_f__norank_o__0319-6G20	OTU5237	0	0	0	0	0	3	0	2	1	1	2	0	9
d__Bacteria	k__norank_d__Bacteria	p__Myxococcota	c__Polyangia	o__Polyangiales	f__Sandaracinaceae	g__unclassified_f__Sandaracinaceae	s__unclassified_f__Sandaracinaceae	OTU5439	0	0	0	1	0	0	0	0	0	0	1	1	3
d__Bacteria	k__norank_d__Bacteria	p__Myxococcota	c__Polyangia	o__Haliangiales	f__Haliangiaceae	g__Haliangium	s__uncultured_bacterium_g__Haliangium	OTU1352	5	3	1	5	3	4	2	7	4	4	5	2	45
d__Bacteria	k__norank_d__Bacteria	p__Chloroflexi	c__OLB14	o__norank_c__OLB14	f__norank_o__norank_c__OLB14	g__norank_f__norank_o__norank_c__OLB14	s__uncultured_bacterium_g__norank_f__norank_o__norank_c__OLB14	OTU624	15	11	10	7	11	14	11	5	14	15	9	5	127
d__Bacteria	k__norank_d__Bacteria	p__Firmicutes	c__Clostridia	o__Oscillospirales	f__unclassified_o__Oscillospirales	g__unclassified_o__Oscillospirales	s__unclassified_o__Oscillospirales	OTU41	2	0	0	0	0	0	0	0	1	0	0	1	4
d__Bacteria	k__norank_d__Bacteria	p__Gemmatimonadota	c__Gemmatimonadetes	o__Gemmatimonadales	f__Gemmatimonadaceae	g__unclassified_f__Gemmatimonadaceae	s__unclassified_f__Gemmatimonadaceae	OTU766	25	29	33	30	27	38	32	39	24	39	31	52	399
d__Bacteria	k__norank_d__Bacteria	p__Firmicutes	c__Bacilli	o__Bacillales	f__unclassified_o__Bacillales	g__unclassified_o__Bacillales	s__unclassified_o__Bacillales	OTU2130	0	0	0	1	0	0	0	0	0	2	0	0	3
d__Bacteria	k__norank_d__Bacteria	p__Myxococcota	c__Polyangia	o__Polyangiales	f__BIrii41	g__norank_f__BIrii41	s__unclassified_g__norank_f__BIrii41	OTU1543	1	1	2	1	4	1	0	0	0	2	1	1	14
d__Bacteria	k__norank_d__Bacteria	p__Proteobacteria	c__Gammaproteobacteria	o__unclassified_c__Gammaproteobacteria	f__unclassified_c__Gammaproteobacteria	g__unclassified_c__Gammaproteobacteria	s__unclassified_c__Gammaproteobacteria	OTU3353	2	2	9	0	2	0	3	2	3	6	7	3	39
d__Bacteria	k__norank_d__Bacteria	p__Armatimonadota	c__norank_p__Armatimonadota	o__norank_c__norank_p__Armatimonadota	f__norank_o__norank_c__norank_p__Armatimonadota	g__norank_f__norank_o__norank_c__norank_p__Armatimonadota	s__unclassified_g__norank_f__norank_o__norank_c__norank_p__Armatimonadota	OTU3239	0	1	0	1	0	0	1	0	2	1	0	0	6
d__Bacteria	k__norank_d__Bacteria	p__Chloroflexi	c__Anaerolineae	o__SBR1031	f__A4b	g__norank_f__A4b	s__uncultured_compost_bacterium_g__norank_f__A4b	OTU2437	0	0	0	0	0	1	0	0	0	0	1	1	3
d__Bacteria	k__norank_d__Bacteria	p__Gemmatimonadota	c__Gemmatimonadetes	o__Gemmatimonadales	f__Gemmatimonadaceae	g__unclassified_f__Gemmatimonadaceae	s__unclassified_f__Gemmatimonadaceae	OTU3791	7	7	2	2	1	1	2	4	4	2	4	3	39
d__Bacteria	k__norank_d__Bacteria	p__Myxococcota	c__bacteriap25	o__norank_c__bacteriap25	f__norank_o__norank_c__bacteriap25	g__norank_f__norank_o__norank_c__bacteriap25	s__uncultured_soil_bacterium_g__norank_f__norank_o__norank_c__bacteriap25	OTU4896	0	1	0	0	0	0	0	0	2	0	0	0	3
d__Bacteria	k__norank_d__Bacteria	p__Chloroflexi	c__Anaerolineae	o__Ardenticatenales	f__norank_o__Ardenticatenales	g__norank_f__norank_o__Ardenticatenales	s__unclassified_g__norank_f__norank_o__Ardenticatenales	OTU1226	0	0	1	0	0	0	0	0	1	0	0	0	2
d__Bacteria	k__norank_d__Bacteria	p__Planctomycetota	c__Planctomycetes	o__Gemmatales	f__Gemmataceae	g__norank_f__Gemmataceae	s__unclassified_g__norank_f__Gemmataceae	OTU1512	0	0	1	0	0	0	0	1	0	0	0	0	2
d__Bacteria	k__norank_d__Bacteria	p__Planctomycetota	c__OM190	o__norank_c__OM190	f__norank_o__norank_c__OM190	g__norank_f__norank_o__norank_c__OM190	s__unclassified_g__norank_f__norank_o__norank_c__OM190	OTU1956	5	1	3	1	4	1	0	7	6	1	1	4	34
d__Bacteria	k__norank_d__Bacteria	p__Firmicutes	c__Bacilli	o__Bacillales	f__Bacillaceae	g__Bacillus	s__Bacillus_sp._SIT16	OTU4863	56	61	67	70	63	65	72	57	85	73	45	57	771
d__Bacteria	k__norank_d__Bacteria	p__Bdellovibrionota	c__Oligoflexia	o__Oligoflexales	f__norank_o__Oligoflexales	g__norank_f__norank_o__Oligoflexales	s__unclassified_g__norank_f__norank_o__Oligoflexales	OTU4919	0	0	0	0	0	0	0	0	1	0	0	1	2
d__Bacteria	k__norank_d__Bacteria	p__Myxococcota	c__Polyangia	o__unclassified_c__Polyangia	f__unclassified_c__Polyangia	g__unclassified_c__Polyangia	s__unclassified_c__Polyangia	OTU3699	0	0	0	0	0	0	1	0	0	0	0	0	1
d__Bacteria	k__norank_d__Bacteria	p__Chloroflexi	c__Anaerolineae	o__SBR1031	f__norank_o__SBR1031	g__norank_f__norank_o__SBR1031	s__wastewater_metagenome_g__norank_f__norank_o__SBR1031	OTU977	2	1	2	0	0	0	0	0	0	0	0	0	5
d__Bacteria	k__norank_d__Bacteria	p__Dependentiae	c__Babeliae	o__Babeliales	f__unclassified_o__Babeliales	g__unclassified_o__Babeliales	s__unclassified_o__Babeliales	OTU1350	0	0	1	0	0	0	0	0	1	1	0	0	3
d__Bacteria	k__norank_d__Bacteria	p__Firmicutes	c__Bacilli	o__Bacillales	f__Bacillaceae	g__Oceanobacillus	s__uncultured_bacterium_g__Oceanobacillus	OTU2097	0	0	1	2	2	0	0	6	2	0	5	3	21
d__Bacteria	k__norank_d__Bacteria	p__Planctomycetota	c__Planctomycetes	o__Isosphaerales	f__Isosphaeraceae	g__norank_f__Isosphaeraceae	s__uncultured_bacterium_g__norank_f__Isosphaeraceae	OTU4798	0	1	0	2	0	0	0	1	1	0	0	0	5
d__Bacteria	k__norank_d__Bacteria	p__Methylomirabilota	c__Methylomirabilia	o__Rokubacteriales	f__norank_o__Rokubacteriales	g__norank_f__norank_o__Rokubacteriales	s__uncultured_bacterium_g__norank_f__norank_o__Rokubacteriales	OTU1399	22	32	23	18	30	19	31	24	27	30	17	18	291
d__Bacteria	k__norank_d__Bacteria	p__Proteobacteria	c__Gammaproteobacteria	o__PLTA13	f__norank_o__PLTA13	g__norank_f__norank_o__PLTA13	s__metagenome_g__norank_f__norank_o__PLTA13	OTU3045	8	2	0	6	3	4	3	3	6	3	2	1	41
d__Bacteria	k__norank_d__Bacteria	p__Proteobacteria	c__Alphaproteobacteria	o__Rickettsiales	f__SM2D12	g__norank_f__SM2D12	s__unclassified_g__norank_f__SM2D12	OTU2608	0	0	0	0	2	0	0	1	0	0	0	0	3
d__Bacteria	k__norank_d__Bacteria	p__Chloroflexi	c__TK10	o__norank_c__TK10	f__norank_o__norank_c__TK10	g__norank_f__norank_o__norank_c__TK10	s__uncultured_bacterium_g__norank_f__norank_o__norank_c__TK10	OTU809	3	2	1	2	2	0	5	3	2	4	2	2	28
d__Bacteria	k__norank_d__Bacteria	p__Chloroflexi	c__Chloroflexia	o__Chloroflexales	f__Roseiflexaceae	g__norank_f__Roseiflexaceae	s__uncultured_bacterium_g__norank_f__Roseiflexaceae	OTU4705	0	0	0	0	0	1	0	0	0	0	0	0	1
d__Bacteria	k__norank_d__Bacteria	p__Proteobacteria	c__Gammaproteobacteria	o__Legionellales	f__Legionellaceae	g__Legionella	s__unclassified_g__Legionella	OTU1274	0	0	0	0	1	1	1	0	0	0	0	0	3
d__Bacteria	k__norank_d__Bacteria	p__Actinobacteriota	c__Actinobacteria	o__Catenulisporales	f__Actinospicaceae	g__Actinospica	s__unclassified_g__Actinospica	OTU4267	0	0	0	0	0	0	2	0	0	0	0	0	2
d__Bacteria	k__norank_d__Bacteria	p__Gemmatimonadota	c__Gemmatimonadetes	o__Gemmatimonadales	f__Gemmatimonadaceae	g__norank_f__Gemmatimonadaceae	s__unclassified_g__norank_f__Gemmatimonadaceae	OTU3919	6	8	5	6	4	6	10	1	4	7	13	8	78
d__Bacteria	k__norank_d__Bacteria	p__Firmicutes	c__Limnochordia	o__MBA03	f__norank_o__MBA03	g__norank_f__norank_o__MBA03	s__uncultured_bacterium_g__norank_f__norank_o__MBA03	OTU1980	2	1	0	5	0	0	0	1	3	2	2	1	17
d__Bacteria	k__norank_d__Bacteria	p__Planctomycetota	c__Planctomycetes	o__Pirellulales	f__Pirellulaceae	g__unclassified_f__Pirellulaceae	s__unclassified_f__Pirellulaceae	OTU1172	0	3	3	3	1	2	1	1	4	1	4	1	24
d__Bacteria	k__norank_d__Bacteria	p__Actinobacteriota	c__Actinobacteria	o__Micromonosporales	f__Micromonosporaceae	g__unclassified_f__Micromonosporaceae	s__unclassified_f__Micromonosporaceae	OTU671	11	19	18	10	10	16	34	8	8	61	15	13	223
d__Bacteria	k__norank_d__Bacteria	p__Firmicutes	c__Limnochordia	o__norank_c__Limnochordia	f__norank_o__norank_c__Limnochordia	g__Hydrogenispora	s__uncultured_compost_bacterium_g__Hydrogenispora	OTU1450	3	3	9	4	2	5	5	3	4	2	5	7	52
d__Bacteria	k__norank_d__Bacteria	p__Chloroflexi	c__JG30-KF-CM66	o__norank_c__JG30-KF-CM66	f__norank_o__norank_c__JG30-KF-CM66	g__norank_f__norank_o__norank_c__JG30-KF-CM66	s__uncultured_bacterium_g__norank_f__norank_o__norank_c__JG30-KF-CM66	OTU3119	1	2	1	1	5	10	1	4	4	1	4	2	36
d__Bacteria	k__norank_d__Bacteria	p__Planctomycetota	c__unclassified_p__Planctomycetota	o__unclassified_p__Planctomycetota	f__unclassified_p__Planctomycetota	g__unclassified_p__Planctomycetota	s__unclassified_p__Planctomycetota	OTU764	0	2	4	1	0	0	0	0	2	1	0	3	13
d__Bacteria	k__norank_d__Bacteria	p__Chloroflexi	c__Anaerolineae	o__RBG-13-54-9	f__norank_o__RBG-13-54-9	g__norank_f__norank_o__RBG-13-54-9	s__unclassified_g__norank_f__norank_o__RBG-13-54-9	OTU1259	2	2	1	1	1	0	1	0	0	1	2	1	12
d__Bacteria	k__norank_d__Bacteria	p__Patescibacteria	c__Saccharimonadia	o__Saccharimonadales	f__LWQ8	g__norank_f__LWQ8	s__uncultured_bacterium_g__norank_f__LWQ8	OTU4476	0	1	1	0	0	2	2	2	0	0	0	0	8
d__Bacteria	k__norank_d__Bacteria	p__Proteobacteria	c__Alphaproteobacteria	o__unclassified_c__Alphaproteobacteria	f__unclassified_c__Alphaproteobacteria	g__unclassified_c__Alphaproteobacteria	s__unclassified_c__Alphaproteobacteria	OTU1841	6	9	7	5	7	7	5	5	12	7	9	5	84
d__Bacteria	k__norank_d__Bacteria	p__Planctomycetota	c__Planctomycetes	o__Pirellulales	f__Pirellulaceae	g__unclassified_f__Pirellulaceae	s__unclassified_f__Pirellulaceae	OTU2573	1	3	0	2	0	0	2	2	3	2	5	0	20
d__Bacteria	k__norank_d__Bacteria	p__Actinobacteriota	c__Actinobacteria	o__Propionibacteriales	f__Nocardioidaceae	g__Marmoricola	s__unclassified_g__Marmoricola	OTU3624	217	156	227	271	223	247	290	172	182	274	167	184	2610
d__Bacteria	k__norank_d__Bacteria	p__Bdellovibrionota	c__Bdellovibrionia	o__Bdellovibrionales	f__Bdellovibrionaceae	g__Bdellovibrio	s__unclassified_g__Bdellovibrio	OTU2386	0	0	0	0	0	0	1	0	0	0	0	0	1
d__Bacteria	k__norank_d__Bacteria	p__Proteobacteria	c__Alphaproteobacteria	o__Rhizobiales	f__norank_o__Rhizobiales	g__norank_f__norank_o__Rhizobiales	s__uncultured_bacterium_g__norank_f__norank_o__Rhizobiales	OTU4223	0	0	1	0	1	1	6	2	0	1	2	0	14
d__Bacteria	k__norank_d__Bacteria	p__Acidobacteriota	c__Subgroup_22	o__norank_c__Subgroup_22	f__norank_o__norank_c__Subgroup_22	g__norank_f__norank_o__norank_c__Subgroup_22	s__unclassified_g__norank_f__norank_o__norank_c__Subgroup_22	OTU769	26	25	29	19	46	25	27	23	27	23	12	16	298
d__Bacteria	k__norank_d__Bacteria	p__Myxococcota	c__Polyangia	o__UASB-TL25	f__norank_o__UASB-TL25	g__norank_f__norank_o__UASB-TL25	s__uncultured_bacterium_g__norank_f__norank_o__UASB-TL25	OTU5008	0	0	2	1	0	0	0	0	0	1	0	1	5
d__Bacteria	k__norank_d__Bacteria	p__Chloroflexi	c__Anaerolineae	o__RBG-13-54-9	f__norank_o__RBG-13-54-9	g__norank_f__norank_o__RBG-13-54-9	s__unclassified_g__norank_f__norank_o__RBG-13-54-9	OTU4991	0	3	2	1	0	0	0	1	1	3	2	0	13
d__Bacteria	k__norank_d__Bacteria	p__Hydrogenedentes	c__Hydrogenedentia	o__Hydrogenedentiales	f__Hydrogenedensaceae	g__norank_f__Hydrogenedensaceae	s__metagenome_g__norank_f__Hydrogenedensaceae	OTU1621	2	1	1	2	2	0	0	0	1	0	0	0	9
d__Bacteria	k__norank_d__Bacteria	p__Planctomycetota	c__Planctomycetes	o__Gemmatales	f__Gemmataceae	g__Gemmata	s__unclassified_g__Gemmata	OTU5231	1	0	0	0	0	0	0	1	1	1	2	3	9
d__Bacteria	k__norank_d__Bacteria	p__unclassified_k__norank_d__Bacteria	c__unclassified_k__norank_d__Bacteria	o__unclassified_k__norank_d__Bacteria	f__unclassified_k__norank_d__Bacteria	g__unclassified_k__norank_d__Bacteria	s__unclassified_k__norank_d__Bacteria	OTU5479	0	0	1	0	1	1	1	1	1	0	4	3	13
d__Bacteria	k__norank_d__Bacteria	p__Proteobacteria	c__Alphaproteobacteria	o__Tistrellales	f__Geminicoccaceae	g__Arboricoccus	s__unclassified_g__Arboricoccus	OTU1721	2	2	2	1	2	1	2	1	0	1	1	2	17
d__Bacteria	k__norank_d__Bacteria	p__Proteobacteria	c__Gammaproteobacteria	o__Diplorickettsiales	f__Diplorickettsiaceae	g__Aquicella	s__unclassified_g__Aquicella	OTU286	2	2	0	1	0	0	0	0	4	0	1	1	11
d__Bacteria	k__norank_d__Bacteria	p__Planctomycetota	c__Planctomycetes	o__Gemmatales	f__Gemmataceae	g__norank_f__Gemmataceae	s__unclassified_g__norank_f__Gemmataceae	OTU3203	0	0	0	0	0	1	0	0	0	0	0	1	2
d__Bacteria	k__norank_d__Bacteria	p__Myxococcota	c__Polyangia	o__Polyangiales	f__Polyangiaceae	g__Pajaroellobacter	s__uncultured_delta_proteobacterium_g__Pajaroellobacter	OTU4541	0	2	2	0	0	1	0	1	1	0	1	2	10
d__Bacteria	k__norank_d__Bacteria	p__Planctomycetota	c__Phycisphaerae	o__Phycisphaerales	f__Phycisphaeraceae	g__norank_f__Phycisphaeraceae	s__uncultured_bacterium_g__norank_f__Phycisphaeraceae	OTU3021	0	0	1	0	1	1	4	0	0	0	0	0	7
d__Bacteria	k__norank_d__Bacteria	p__Proteobacteria	c__Gammaproteobacteria	o__Cellvibrionales	f__Spongiibacteraceae	g__BD1-7_clade	s__uncultured_bacterium_g__BD1-7_clade	OTU1701	0	4	2	2	1	0	2	0	0	2	0	3	16
d__Bacteria	k__norank_d__Bacteria	p__Firmicutes	c__Limnochordia	o__Limnochordales	f__Limnochordaceae	g__norank_f__Limnochordaceae	s__uncultured_bacterium_g__norank_f__Limnochordaceae	OTU4056	0	1	0	1	0	1	1	1	0	2	0	0	7
d__Bacteria	k__norank_d__Bacteria	p__Patescibacteria	c__Saccharimonadia	o__Saccharimonadales	f__Saccharimonadaceae	g__TM7a	s__uncultured_bacterium_g__TM7a	OTU5443	1	1	1	0	2	4	0	0	1	1	3	2	16
d__Bacteria	k__norank_d__Bacteria	p__Acidobacteriota	c__Blastocatellia	o__11-24	f__norank_o__11-24	g__norank_f__norank_o__11-24	s__unclassified_g__norank_f__norank_o__11-24	OTU4805	0	0	0	3	0	0	0	1	0	1	0	0	5
d__Bacteria	k__norank_d__Bacteria	p__Actinobacteriota	c__Thermoleophilia	o__Gaiellales	f__norank_o__Gaiellales	g__norank_f__norank_o__Gaiellales	s__uncultured_Conexibacter_sp._g__norank	OTU4377	25	15	20	20	19	14	30	37	26	29	21	28	284
d__Bacteria	k__norank_d__Bacteria	p__Proteobacteria	c__Alphaproteobacteria	o__Micropepsales	f__Micropepsaceae	g__norank_f__Micropepsaceae	s__metagenome_g__norank_f__Micropepsaceae	OTU2966	4	1	2	0	2	0	0	0	0	1	0	0	10
d__Bacteria	k__norank_d__Bacteria	p__Chloroflexi	c__Anaerolineae	o__SBR1031	f__norank_o__SBR1031	g__norank_f__norank_o__SBR1031	s__uncultured_bacterium_g__norank_f__norank_o__SBR1031	OTU4210	0	1	1	0	0	0	1	0	1	0	0	0	4
d__Bacteria	k__norank_d__Bacteria	p__Firmicutes	c__Bacilli	o__Bacillales	f__Bacillaceae	g__Bacillus	s__Bacillus_thermoamylovorans	OTU658	4	4	4	2	2	4	2	0	3	5	3	7	40
d__Bacteria	k__norank_d__Bacteria	p__Gemmatimonadota	c__S0134_terrestrial_group	o__norank_c__S0134_terrestrial_group	f__norank_o__norank_c__S0134_terrestrial_group	g__norank_f__norank_o__norank_c__S0134_terrestrial_group	s__unclassified_g__norank_f__norank_o__norank_c__S0134_terrestrial_group	OTU879	0	1	2	1	1	1	1	0	1	0	3	4	15
d__Bacteria	k__norank_d__Bacteria	p__Myxococcota	c__Polyangia	o__Polyangiales	f__Polyangiaceae	g__Polyangium	s__unclassified_g__Polyangium	OTU4917	0	2	0	0	0	1	1	0	2	1	1	0	8
d__Bacteria	k__norank_d__Bacteria	p__Gemmatimonadota	c__Gemmatimonadetes	o__Gemmatimonadales	f__Gemmatimonadaceae	g__norank_f__Gemmatimonadaceae	s__unclassified_g__norank_f__Gemmatimonadaceae	OTU2779	4	1	6	1	3	1	3	3	4	4	2	3	35
d__Bacteria	k__norank_d__Bacteria	p__Firmicutes	c__Clostridia	o__norank_c__Clostridia	f__Hungateiclostridiaceae	g__Ruminiclostridium	s__unclassified_g__Ruminiclostridium	OTU1267	0	0	1	0	0	0	0	0	0	1	0	0	2
d__Bacteria	k__norank_d__Bacteria	p__Proteobacteria	c__Alphaproteobacteria	o__Rhodobacterales	f__Rhodobacteraceae	g__unclassified_f__Rhodobacteraceae	s__unclassified_f__Rhodobacteraceae	OTU2526	0	0	1	2	1	0	2	0	1	1	1	0	9
d__Bacteria	k__norank_d__Bacteria	p__Proteobacteria	c__Alphaproteobacteria	o__Rhizobiales	f__Amb-16S-1323	g__norank_f__Amb-16S-1323	s__uncultured_bacterium_g__norank_f__Amb-16S-1323	OTU1883	0	1	6	0	3	2	1	0	0	5	0	1	19
d__Bacteria	k__norank_d__Bacteria	p__Firmicutes	c__Bacilli	o__Lactobacillales	f__Lactobacillaceae	g__Lactobacillus	s__Lactobacillus_plantarum_g__Lactobacillus	OTU4116	5	0	0	0	1	0	8	0	0	0	0	0	14
d__Bacteria	k__norank_d__Bacteria	p__Actinobacteriota	c__Acidimicrobiia	o__Microtrichales	f__Ilumatobacteraceae	g__norank_f__Ilumatobacteraceae	s__unclassified_g__norank_f__Ilumatobacteraceae	OTU3057	0	0	2	0	2	1	0	0	1	0	0	1	7
d__Bacteria	k__norank_d__Bacteria	p__Patescibacteria	c__Saccharimonadia	o__Saccharimonadales	f__norank_o__Saccharimonadales	g__norank_f__norank_o__Saccharimonadales	s__unclassified_g__norank_f__norank_o__Saccharimonadales	OTU4897	0	0	0	0	0	0	0	0	5	0	0	0	5
d__Bacteria	k__norank_d__Bacteria	p__Actinobacteriota	c__Acidimicrobiia	o__Microtrichales	f__Ilumatobacteraceae	g__norank_f__Ilumatobacteraceae	s__unclassified_g__norank_f__Ilumatobacteraceae	OTU4640	1	0	1	2	2	0	0	0	0	0	0	0	6
d__Bacteria	k__norank_d__Bacteria	p__Acidobacteriota	c__Vicinamibacteria	o__Vicinamibacterales	f__Vicinamibacteraceae	g__norank_f__Vicinamibacteraceae	s__unclassified_g__norank_f__Vicinamibacteraceae	OTU1723	35	21	32	28	34	15	31	40	24	6	19	28	313
d__Bacteria	k__norank_d__Bacteria	p__Myxococcota	c__Myxococcia	o__Myxococcales	f__Myxococcaceae	g__KD3-10	s__unclassified_g__KD3-10	OTU134	0	0	0	0	0	0	0	1	0	0	1	0	2
d__Bacteria	k__norank_d__Bacteria	p__Chloroflexi	c__Anaerolineae	o__SBR1031	f__norank_o__SBR1031	g__norank_f__norank_o__SBR1031	s__uncultured_Anaerolineaceae_bacterium_g__norank_f__norank_o__SBR1031	OTU4679	0	0	0	2	0	0	0	1	0	0	2	0	5
d__Bacteria	k__norank_d__Bacteria	p__Proteobacteria	c__Gammaproteobacteria	o__Diplorickettsiales	f__Diplorickettsiaceae	g__Aquicella	s__uncultured_bacterium_g__Aquicella	OTU3070	0	0	0	0	1	0	0	0	0	0	0	0	1
d__Bacteria	k__norank_d__Bacteria	p__Myxococcota	c__Myxococcia	o__Myxococcales	f__Myxococcaceae	g__P3OB-42	s__uncultured_bacterium_g__P3OB-42	OTU4288	0	0	0	0	2	0	2	0	0	0	0	0	4
d__Bacteria	k__norank_d__Bacteria	p__Planctomycetota	c__Phycisphaerae	o__Tepidisphaerales	f__WD2101_soil_group	g__norank_f__WD2101_soil_group	s__uncultured_bacterium_g__norank_f__WD2101_soil_group	OTU4108	10	11	18	14	22	22	9	28	16	3	12	14	179
d__Bacteria	k__norank_d__Bacteria	p__Chloroflexi	c__Anaerolineae	o__SBR1031	f__A4b	g__unclassified_f__A4b	s__unclassified_f__A4b	OTU972	0	0	2	2	0	2	0	1	1	0	0	0	8
d__Bacteria	k__norank_d__Bacteria	p__Firmicutes	c__Bacilli	o__unclassified_c__Bacilli	f__unclassified_c__Bacilli	g__unclassified_c__Bacilli	s__unclassified_c__Bacilli	OTU3934	1	4	1	3	1	1	1	1	0	1	1	0	15
d__Bacteria	k__norank_d__Bacteria	p__Planctomycetota	c__Planctomycetes	o__Pirellulales	f__Pirellulaceae	g__Pir4_lineage	s__unclassified_g__Pir4_lineage	OTU2591	4	9	12	9	11	3	3	7	3	1	5	10	77
d__Bacteria	k__norank_d__Bacteria	p__Patescibacteria	c__Saccharimonadia	o__Saccharimonadales	f__norank_o__Saccharimonadales	g__norank_f__norank_o__Saccharimonadales	s__uncultured_Epsilonproteobacteria_bacterium_g__norank_f__norank_o__Saccharimonadales	OTU5477	0	0	0	0	1	0	0	0	0	0	0	0	1
d__Bacteria	k__norank_d__Bacteria	p__Firmicutes	c__Bacilli	o__Thermoactinomycetales	f__Thermoactinomycetaceae	g__Shimazuella	s__uncultured_bacterium_g__Shimazuella	OTU5018	0	0	0	1	1	2	2	0	2	1	0	0	9
d__Bacteria	k__norank_d__Bacteria	p__Chloroflexi	c__Chloroflexia	o__Thermomicrobiales	f__AKYG1722	g__norank_f__AKYG1722	s__uncultured_bacterium_g__norank_f__AKYG1722	OTU2628	6	4	6	2	4	6	1	2	0	2	0	3	36
d__Bacteria	k__norank_d__Bacteria	p__Armatimonadota	c__norank_p__Armatimonadota	o__norank_c__norank_p__Armatimonadota	f__norank_o__norank_c__norank_p__Armatimonadota	g__norank_f__norank_o__norank_c__norank_p__Armatimonadota	s__uncultured_bacterium_g__norank_f__norank_o__norank_c__norank_p__Armatimonadota	OTU3922	4	2	7	8	13	5	5	11	14	1	8	6	84
d__Bacteria	k__norank_d__Bacteria	p__Proteobacteria	c__Alphaproteobacteria	o__unclassified_c__Alphaproteobacteria	f__unclassified_c__Alphaproteobacteria	g__unclassified_c__Alphaproteobacteria	s__unclassified_c__Alphaproteobacteria	OTU371	0	1	0	0	0	0	0	0	1	0	0	1	3
d__Bacteria	k__norank_d__Bacteria	p__Acidobacteriota	c__Vicinamibacteria	o__Vicinamibacterales	f__Vicinamibacteraceae	g__norank_f__Vicinamibacteraceae	s__unclassified_g__norank_f__Vicinamibacteraceae	OTU3846	1	0	0	0	0	0	3	8	9	1	3	4	29
d__Bacteria	k__norank_d__Bacteria	p__Proteobacteria	c__Gammaproteobacteria	o__norank_c__Gammaproteobacteria	f__norank_o__norank_c__Gammaproteobacteria	g__norank_f__norank_o__norank_c__Gammaproteobacteria	s__symbiont_of_Cochliopodium_minus	OTU2797	0	0	0	0	0	0	0	0	0	0	0	2	2
d__Bacteria	k__norank_d__Bacteria	p__Acidobacteriota	c__Vicinamibacteria	o__Vicinamibacterales	f__Vicinamibacteraceae	g__norank_f__Vicinamibacteraceae	s__uncultured_Acidobacteriales_bacterium_g__norank_f__Vicinamibacteraceae	OTU4265	34	43	63	69	59	26	44	81	57	17	48	50	591
d__Bacteria	k__norank_d__Bacteria	p__Patescibacteria	c__Microgenomatia	o__Candidatus_Amesbacteria	f__norank_o__Candidatus_Amesbacteria	g__norank_f__norank_o__Candidatus_Amesbacteria	s__unclassified_g__norank_f__norank_o__Candidatus_Amesbacteria	OTU5574	0	0	0	0	0	0	0	0	0	0	0	1	1
d__Bacteria	k__norank_d__Bacteria	p__Chloroflexi	c__unclassified_p__Chloroflexi	o__unclassified_p__Chloroflexi	f__unclassified_p__Chloroflexi	g__unclassified_p__Chloroflexi	s__unclassified_p__Chloroflexi	OTU1595	1	0	2	1	1	0	3	5	5	1	1	3	23
d__Bacteria	k__norank_d__Bacteria	p__Myxococcota	c__Polyangia	o__Haliangiales	f__Haliangiaceae	g__Haliangium	s__unclassified_g__Haliangium	OTU1034	0	0	1	0	0	1	1	0	0	0	0	1	4
d__Bacteria	k__norank_d__Bacteria	p__Proteobacteria	c__Alphaproteobacteria	o__Elsterales	f__norank_o__Elsterales	g__norank_f__norank_o__Elsterales	s__uncultured_bacterium_g__norank_f__norank_o__Elsterales	OTU4348	3	1	1	0	1	0	12	0	3	1	0	1	23
d__Bacteria	k__norank_d__Bacteria	p__Planctomycetota	c__Planctomycetes	o__Pirellulales	f__Pirellulaceae	g__Pir4_lineage	s__unclassified_g__Pir4_lineage	OTU754	5	8	17	14	7	10	5	13	13	8	13	10	123
d__Bacteria	k__norank_d__Bacteria	p__Latescibacterota	c__norank_p__Latescibacterota	o__norank_c__norank_p__Latescibacterota	f__norank_o__norank_c__norank_p__Latescibacterota	g__norank_f__norank_o__norank_c__norank_p__Latescibacterota	s__uncultured_Latescibacteria_bacterium_g__norank_f__norank	OTU710	14	5	11	6	8	5	12	20	9	2	11	8	111
d__Bacteria	k__norank_d__Bacteria	p__Patescibacteria	c__Saccharimonadia	o__Saccharimonadales	f__S32	g__TM7	s__unclassified_g__TM7	OTU5562	0	0	0	0	0	0	0	0	0	0	0	1	1
d__Bacteria	k__norank_d__Bacteria	p__Bacteroidota	c__Bacteroidia	o__Chitinophagales	f__unclassified_o__Chitinophagales	g__unclassified_o__Chitinophagales	s__unclassified_o__Chitinophagales	OTU5073	1	2	0	1	0	1	0	1	1	1	0	0	8
d__Bacteria	k__norank_d__Bacteria	p__Proteobacteria	c__Gammaproteobacteria	o__Legionellales	f__Legionellaceae	g__Legionella	s__unclassified_g__Legionella	OTU1514	0	0	0	0	0	0	0	1	0	0	0	0	1
d__Bacteria	k__norank_d__Bacteria	p__Bacteroidota	c__Rhodothermia	o__Rhodothermales	f__Rhodothermaceae	g__norank_f__Rhodothermaceae	s__unclassified_g__norank_f__Rhodothermaceae	OTU1246	2	0	2	0	0	0	0	1	0	0	0	0	5
d__Bacteria	k__norank_d__Bacteria	p__unclassified_k__norank_d__Bacteria	c__unclassified_k__norank_d__Bacteria	o__unclassified_k__norank_d__Bacteria	f__unclassified_k__norank_d__Bacteria	g__unclassified_k__norank_d__Bacteria	s__unclassified_k__norank_d__Bacteria	OTU364	1	2	0	1	1	2	0	1	1	0	1	1	11
d__Bacteria	k__norank_d__Bacteria	p__unclassified_k__norank_d__Bacteria	c__unclassified_k__norank_d__Bacteria	o__unclassified_k__norank_d__Bacteria	f__unclassified_k__norank_d__Bacteria	g__unclassified_k__norank_d__Bacteria	s__unclassified_k__norank_d__Bacteria	OTU361	0	1	0	0	0	0	0	1	0	0	0	0	2
d__Bacteria	k__norank_d__Bacteria	p__Bacteroidota	c__Rhodothermia	o__Rhodothermales	f__Rhodothermaceae	g__norank_f__Rhodothermaceae	s__unclassified_g__norank_f__Rhodothermaceae	OTU5554	0	0	1	0	0	0	0	0	0	0	0	2	3
d__Bacteria	k__norank_d__Bacteria	p__NB1-j	c__norank_p__NB1-j	o__norank_c__norank_p__NB1-j	f__norank_o__norank_c__norank_p__NB1-j	g__norank_f__norank_o__norank_c__norank_p__NB1-j	s__unclassified_g__norank_f__norank_o__norank_c__norank_p__NB1-j	OTU3884	3	2	0	0	1	1	4	1	6	7	6	1	32
d__Bacteria	k__norank_d__Bacteria	p__Firmicutes	c__Bacilli	o__Thermoactinomycetales	f__Thermoactinomycetaceae	g__norank_f__Thermoactinomycetaceae	s__unclassified_g__norank_f__Thermoactinomycetaceae	OTU3436	5	4	7	6	4	11	6	4	6	4	4	7	68
d__Bacteria	k__norank_d__Bacteria	p__Cyanobacteria	c__Cyanobacteriia	o__Oxyphotobacteria_Incertae_Sedis	f__unclassified_o__Oxyphotobacteria_Incertae_Sedis	g__Pseudanabaena_NgrPSln22	s__Pseudanabaena_sp._SCSIO_S3	OTU3885	1	0	0	2	0	0	5	3	2	0	0	0	13
d__Bacteria	k__norank_d__Bacteria	p__Chloroflexi	c__Chloroflexia	o__Thermomicrobiales	f__AKYG1722	g__norank_f__AKYG1722	s__uncultured_bacterium_g__norank_f__AKYG1722	OTU602	52	65	52	33	59	45	36	31	37	45	50	46	551
d__Bacteria	k__norank_d__Bacteria	p__Bacteroidota	c__Bacteroidia	o__Flavobacteriales	f__unclassified_o__Flavobacteriales	g__unclassified_o__Flavobacteriales	s__unclassified_o__Flavobacteriales	OTU5222	0	0	0	0	0	5	0	0	0	2	1	0	8
d__Bacteria	k__norank_d__Bacteria	p__Planctomycetota	c__Planctomycetes	o__Gemmatales	f__Gemmataceae	g__norank_f__Gemmataceae	s__uncultured_bacterium_g__norank_f__Gemmataceae	OTU1389	2	3	1	1	3	0	0	5	2	0	1	0	18
d__Bacteria	k__norank_d__Bacteria	p__Planctomycetota	c__Planctomycetes	o__Isosphaerales	f__Isosphaeraceae	g__norank_f__Isosphaeraceae	s__unclassified_g__norank_f__Isosphaeraceae	OTU5415	3	2	3	2	0	0	1	1	2	1	3	0	18
d__Bacteria	k__norank_d__Bacteria	p__Patescibacteria	c__Saccharimonadia	o__Saccharimonadales	f__LWQ8	g__norank_f__LWQ8	s__uncultured_bacterium_g__norank_f__LWQ8	OTU1580	3	0	4	2	0	0	0	0	1	0	1	4	15
d__Bacteria	k__norank_d__Bacteria	p__Armatimonadota	c__norank_p__Armatimonadota	o__norank_c__norank_p__Armatimonadota	f__norank_o__norank_c__norank_p__Armatimonadota	g__norank_f__norank_o__norank_c__norank_p__Armatimonadota	s__uncultured_actinobacterium_g__norank_f__norank_o__norank_c__norank_p__Armatimonadota	OTU4502	0	2	1	2	0	2	1	1	4	1	1	2	17
d__Bacteria	k__norank_d__Bacteria	p__Planctomycetota	c__OM190	o__norank_c__OM190	f__norank_o__norank_c__OM190	g__norank_f__norank_o__norank_c__OM190	s__unclassified_g__norank_f__norank_o__norank_c__OM190	OTU1546	11	6	6	3	4	1	2	3	5	1	1	7	50
d__Bacteria	k__norank_d__Bacteria	p__Actinobacteriota	c__Acidimicrobiia	o__Microtrichales	f__Ilumatobacteraceae	g__norank_f__Ilumatobacteraceae	s__uncultured_actinobacterium_g__norank_f__Ilumatobacteraceae	OTU4820	1	2	3	1	1	5	3	2	2	2	2	4	28
d__Bacteria	k__norank_d__Bacteria	p__Gemmatimonadota	c__S0134_terrestrial_group	o__norank_c__S0134_terrestrial_group	f__norank_o__norank_c__S0134_terrestrial_group	g__norank_f__norank_o__norank_c__S0134_terrestrial_group	s__uncultured_bacterium_g__norank_f__norank_o__norank_c__S0134_terrestrial_group	OTU3288	4	2	0	1	2	3	7	2	3	2	2	7	35
d__Bacteria	k__norank_d__Bacteria	p__Gemmatimonadota	c__Longimicrobia	o__Longimicrobiales	f__Longimicrobiaceae	g__unclassified_f__Longimicrobiaceae	s__unclassified_f__Longimicrobiaceae	OTU5041	0	0	0	0	0	0	2	1	0	4	2	0	9
d__Bacteria	k__norank_d__Bacteria	p__Patescibacteria	c__Saccharimonadia	o__Saccharimonadales	f__norank_o__Saccharimonadales	g__norank_f__norank_o__Saccharimonadales	s__uncultured_bacterium_g__norank_f__norank_o__Saccharimonadales	OTU5200	1	2	0	0	1	0	0	0	3	2	0	1	10
d__Bacteria	k__norank_d__Bacteria	p__Proteobacteria	c__Gammaproteobacteria	o__R7C24	f__norank_o__R7C24	g__norank_f__norank_o__R7C24	s__unclassified_g__norank_f__norank_o__R7C24	OTU3013	1	0	0	0	1	3	0	3	0	1	0	1	10
d__Bacteria	k__norank_d__Bacteria	p__Chloroflexi	c__Anaerolineae	o__Caldilineales	f__Caldilineaceae	g__Litorilinea	s__unclassified_g__Litorilinea	OTU4202	4	6	3	5	1	3	6	5	4	9	4	2	52
d__Bacteria	k__norank_d__Bacteria	p__Bacteroidota	c__Bacteroidia	o__Chitinophagales	f__Chitinophagaceae	g__Puia	s__uncultured_soil_bacterium_g__Puia	OTU4408	48	48	34	35	38	29	54	51	42	53	38	40	510
d__Bacteria	k__norank_d__Bacteria	p__Myxococcota	c__Myxococcia	o__Myxococcales	f__Myxococcaceae	g__unclassified_f__Myxococcaceae	s__unclassified_f__Myxococcaceae	OTU2111	0	0	1	2	1	0	0	0	0	0	1	0	5
d__Bacteria	k__norank_d__Bacteria	p__Firmicutes	c__Clostridia	o__Thermincolales	f__Thermincolaceae	g__Thermincola	s__uncultured_bacterium_g__Thermincola	OTU3980	1	1	0	0	0	0	0	0	0	0	1	0	3
d__Bacteria	k__norank_d__Bacteria	p__Firmicutes	c__Bacilli	o__Paenibacillales	f__Paenibacillaceae	g__Paenibacillus	s__Paenibacillus_curdlanolyticus_YK9	OTU3111	0	0	2	0	1	0	2	2	0	0	2	1	10
d__Bacteria	k__norank_d__Bacteria	p__Verrucomicrobiota	c__Verrucomicrobiae	o__Pedosphaerales	f__Pedosphaeraceae	g__unclassified_f__Pedosphaeraceae	s__unclassified_f__Pedosphaeraceae	OTU2563	1	1	2	0	1	4	0	0	0	1	2	1	13
d__Bacteria	k__norank_d__Bacteria	p__Proteobacteria	c__Gammaproteobacteria	o__Oceanospirillales	f__Pseudohongiellaceae	g__BIyi10	s__uncultured_bacterium_g__BIyi10	OTU4970	1	0	3	1	3	1	0	0	1	5	0	2	17
d__Bacteria	k__norank_d__Bacteria	p__Proteobacteria	c__Alphaproteobacteria	o__Rhizobiales	f__Hyphomicrobiaceae	g__unclassified_f__Hyphomicrobiaceae	s__unclassified_f__Hyphomicrobiaceae	OTU999	11	20	19	13	7	14	10	18	11	26	19	11	179
d__Bacteria	k__norank_d__Bacteria	p__Verrucomicrobiota	c__Chlamydiae	o__Chlamydiales	f__Parachlamydiaceae	g__Neochlamydia	s__uncultured_bacterium_g__Neochlamydia	OTU2405	1	0	0	1	0	0	0	0	0	0	0	1	3
d__Bacteria	k__norank_d__Bacteria	p__Proteobacteria	c__Alphaproteobacteria	o__Rhizobiales	f__Amb-16S-1323	g__norank_f__Amb-16S-1323	s__uncultured_bacterium_g__norank_f__Amb-16S-1323	OTU232	21	18	21	26	25	26	30	18	35	43	32	35	330
d__Bacteria	k__norank_d__Bacteria	p__Patescibacteria	c__ABY1	o__unclassified_c__ABY1	f__unclassified_c__ABY1	g__unclassified_c__ABY1	s__unclassified_c__ABY1	OTU453	0	2	0	0	0	0	0	0	0	0	0	0	2
d__Bacteria	k__norank_d__Bacteria	p__Patescibacteria	c__Saccharimonadia	o__Saccharimonadales	f__S32	g__TM7	s__uncultured_bacterium_g__TM7	OTU4668	7	26	4	16	4	15	0	2	4	8	4	3	93
d__Bacteria	k__norank_d__Bacteria	p__Firmicutes	c__Limnochordia	o__Limnochordales	f__Limnochordaceae	g__norank_f__Limnochordaceae	s__uncultured_bacterium_g__norank_f__Limnochordaceae	OTU5241	0	0	0	0	0	0	0	0	0	2	0	0	2
d__Bacteria	k__norank_d__Bacteria	p__Firmicutes	c__Bacilli	o__unclassified_c__Bacilli	f__unclassified_c__Bacilli	g__unclassified_c__Bacilli	s__unclassified_c__Bacilli	OTU3346	0	0	2	0	1	2	0	0	0	1	2	2	10
d__Bacteria	k__norank_d__Bacteria	p__Firmicutes	c__Bacilli	o__Paenibacillales	f__Paenibacillaceae	g__Paenibacillus	s__unclassified_g__Paenibacillus	OTU373	0	1	0	0	1	0	0	0	1	1	0	0	4
d__Bacteria	k__norank_d__Bacteria	p__Planctomycetota	c__Planctomycetes	o__Planctomycetales	f__Rubinisphaeraceae	g__SH-PL14	s__uncultured_Planctomycetaceae_bacterium_g__SH-PL14	OTU2104	5	0	3	3	4	0	0	0	4	2	7	4	32
d__Bacteria	k__norank_d__Bacteria	p__Actinobacteriota	c__Acidimicrobiia	o__Microtrichales	f__norank_o__Microtrichales	g__norank_f__norank_o__Microtrichales	s__unclassified_g__norank_f__norank_o__Microtrichales	OTU3388	0	0	0	1	1	1	1	2	0	0	0	0	6
d__Bacteria	k__norank_d__Bacteria	p__Patescibacteria	c__Gracilibacteria	o__norank_c__Gracilibacteria	f__norank_o__norank_c__Gracilibacteria	g__norank_f__norank_o__norank_c__Gracilibacteria	s__uncultured_bacterium_g__norank_f__norank_o__norank_c__Gracilibacteria	OTU5474	2	0	2	0	0	1	0	2	0	1	0	2	10
d__Bacteria	k__norank_d__Bacteria	p__Proteobacteria	c__Alphaproteobacteria	o__Elsterales	f__norank_o__Elsterales	g__norank_f__norank_o__Elsterales	s__unclassified_g__norank_f__norank_o__Elsterales	OTU3680	0	0	0	0	0	0	1	0	1	0	1	0	3
d__Bacteria	k__norank_d__Bacteria	p__Planctomycetota	c__Planctomycetes	o__Pirellulales	f__Pirellulaceae	g__norank_f__Pirellulaceae	s__uncultured_soil_bacterium_g__norank_f__Pirellulaceae	OTU1134	9	6	8	13	10	7	0	8	1	2	5	6	75
d__Bacteria	k__norank_d__Bacteria	p__Firmicutes	c__Bacilli	o__Bacillales	f__Bacillaceae	g__Pseudogracilibacillus	s__unclassified_g__Pseudogracilibacillus	OTU1499	4	6	8	5	8	3	13	17	6	27	23	18	138
d__Bacteria	k__norank_d__Bacteria	p__Proteobacteria	c__Gammaproteobacteria	o__unclassified_c__Gammaproteobacteria	f__unclassified_c__Gammaproteobacteria	g__unclassified_c__Gammaproteobacteria	s__unclassified_c__Gammaproteobacteria	OTU2254	1	0	0	1	1	1	0	2	2	1	1	2	12
d__Bacteria	k__norank_d__Bacteria	p__Proteobacteria	c__Gammaproteobacteria	o__Diplorickettsiales	f__Diplorickettsiaceae	g__norank_f__Diplorickettsiaceae	s__unclassified_g__norank_f__Diplorickettsiaceae	OTU2211	1	0	0	5	0	0	0	0	0	1	3	1	11
d__Bacteria	k__norank_d__Bacteria	p__Firmicutes	c__Clostridia	o__Clostridiales	f__Clostridiaceae	g__Clostridium_sensu_stricto_1	s__unclassified_g__Clostridium_sensu_stricto_1	OTU4301	6	4	4	3	1	3	3	2	6	1	2	2	37
d__Bacteria	k__norank_d__Bacteria	p__Dependentiae	c__Babeliae	o__Babeliales	f__Vermiphilaceae	g__norank_f__Vermiphilaceae	s__uncultured_bacterium_g__norank_f__Vermiphilaceae	OTU3192	2	0	0	0	0	1	0	0	0	0	1	0	4
d__Bacteria	k__norank_d__Bacteria	p__Planctomycetota	c__OM190	o__norank_c__OM190	f__norank_o__norank_c__OM190	g__norank_f__norank_o__norank_c__OM190	s__unclassified_g__norank_f__norank_o__norank_c__OM190	OTU2635	2	3	2	1	2	1	1	1	4	1	2	4	24
d__Bacteria	k__norank_d__Bacteria	p__Patescibacteria	c__Saccharimonadia	o__Saccharimonadales	f__LWQ8	g__norank_f__LWQ8	s__uncultured_bacterium_g__norank_f__LWQ8	OTU331	3	3	2	3	0	1	0	3	2	0	3	3	23
d__Bacteria	k__norank_d__Bacteria	p__Cyanobacteria	c__Vampirivibrionia	o__Obscuribacterales	f__Obscuribacteraceae	g__norank_f__Obscuribacteraceae	s__uncultured_bacterium_g__norank_f__Obscuribacteraceae	OTU1960	1	1	0	0	0	0	2	1	0	1	1	0	7
d__Bacteria	k__norank_d__Bacteria	p__Acidobacteriota	c__Acidobacteriae	o__Elev-16S-1166	f__norank_o__Elev-16S-1166	g__norank_f__norank_o__Elev-16S-1166	s__uncultured_bacterium_g__norank_f__norank_o__Elev-16S-1166	OTU2420	0	0	0	0	0	1	0	0	2	1	0	0	4
d__Bacteria	k__norank_d__Bacteria	p__Desulfobacterota	c__unclassified_p__Desulfobacterota	o__unclassified_p__Desulfobacterota	f__unclassified_p__Desulfobacterota	g__unclassified_p__Desulfobacterota	s__unclassified_p__Desulfobacterota	OTU195	0	0	0	0	0	0	0	1	0	0	0	0	1
d__Bacteria	k__norank_d__Bacteria	p__Bacteroidota	c__Bacteroidia	o__Chitinophagales	f__Chitinophagaceae	g__Terrimonas	s__uncultured_bacterium_g__Terrimonas	OTU1270	24	39	29	19	26	35	20	25	24	28	26	19	314
d__Bacteria	k__norank_d__Bacteria	p__Firmicutes	c__unclassified_p__Firmicutes	o__unclassified_p__Firmicutes	f__unclassified_p__Firmicutes	g__unclassified_p__Firmicutes	s__unclassified_p__Firmicutes	OTU3660	1	0	0	0	0	0	0	0	0	0	0	1	2
d__Bacteria	k__norank_d__Bacteria	p__Proteobacteria	c__Gammaproteobacteria	o__Acidiferrobacterales	f__Acidiferrobacteraceae	g__Sulfurifustis	s__unclassified_g__Sulfurifustis	OTU1788	0	0	2	0	0	0	0	0	0	0	0	0	2
d__Bacteria	k__norank_d__Bacteria	p__Chloroflexi	c__Anaerolineae	o__SBR1031	f__A4b	g__norank_f__A4b	s__uncultured_Caldilineales_bacterium_g__norank	OTU1471	2	4	6	2	1	8	1	2	3	4	4	3	40
d__Bacteria	k__norank_d__Bacteria	p__Gemmatimonadota	c__Longimicrobia	o__Longimicrobiales	f__Longimicrobiaceae	g__YC-ZSS-LKJ147	s__unclassified_g__YC-ZSS-LKJ147	OTU5074	2	1	0	0	0	3	0	0	1	1	0	0	8
d__Bacteria	k__norank_d__Bacteria	p__Acidobacteriota	c__Subgroup_25	o__norank_c__Subgroup_25	f__norank_o__norank_c__Subgroup_25	g__norank_f__norank_o__norank_c__Subgroup_25	s__unclassified_g__norank_f__norank_o__norank_c__Subgroup_25	OTU1718	7	4	6	10	4	3	5	13	10	2	5	10	79
d__Bacteria	k__norank_d__Bacteria	p__Chloroflexi	c__Chloroflexia	o__Thermomicrobiales	f__AKYG1722	g__norank_f__AKYG1722	s__unclassified_g__norank_f__AKYG1722	OTU5017	2	0	3	0	1	0	0	1	1	3	0	1	12
d__Bacteria	k__norank_d__Bacteria	p__Planctomycetota	c__Phycisphaerae	o__Phycisphaerales	f__Phycisphaeraceae	g__SM1A02	s__uncultured_Planctomycetales_bacterium_g__SM1A02	OTU1368	6	10	5	3	2	2	6	4	5	9	9	10	71
d__Bacteria	k__norank_d__Bacteria	p__Nitrospirota	c__Nitrospiria	o__Nitrospirales	f__Nitrospiraceae	g__Nitrospira	s__Nitrospira_bacterium_SG8_3	OTU3337	0	0	0	0	0	1	1	0	0	0	1	0	3
d__Bacteria	k__norank_d__Bacteria	p__Bdellovibrionota	c__Oligoflexia	o__0319-6G20	f__norank_o__0319-6G20	g__norank_f__norank_o__0319-6G20	s__unclassified_g__norank_f__norank_o__0319-6G20	OTU2861	2	2	3	5	5	2	0	5	3	1	2	1	31
d__Bacteria	k__norank_d__Bacteria	p__Bacteroidota	c__Bacteroidia	o__Chitinophagales	f__Chitinophagaceae	g__Edaphobaculum	s__uncultured_bacterium_g__Edaphobaculum	OTU4238	4	7	9	2	4	3	10	8	7	7	4	6	71
d__Bacteria	k__norank_d__Bacteria	p__Myxococcota	c__Myxococcia	o__Myxococcales	f__27F-1492R	g__norank_f__27F-1492R	s__uncultured_bacterium_g__norank_f__27F-1492R	OTU2110	1	0	1	2	1	1	2	1	0	1	1	4	15
d__Bacteria	k__norank_d__Bacteria	p__Chloroflexi	c__OLB14	o__norank_c__OLB14	f__norank_o__norank_c__OLB14	g__norank_f__norank_o__norank_c__OLB14	s__unclassified_g__norank_f__norank_o__norank_c__OLB14	OTU2365	0	0	0	2	0	0	0	2	1	0	0	0	5
d__Bacteria	k__norank_d__Bacteria	p__Proteobacteria	c__Alphaproteobacteria	o__Rhizobiales	f__Beijerinckiaceae	g__Bosea	s__unclassified_g__Bosea	OTU1506	3	4	5	7	9	4	3	4	3	6	5	2	55
d__Bacteria	k__norank_d__Bacteria	p__Chloroflexi	c__JG30-KF-CM66	o__norank_c__JG30-KF-CM66	f__norank_o__norank_c__JG30-KF-CM66	g__norank_f__norank_o__norank_c__JG30-KF-CM66	s__uncultured_bacterium_g__norank_f__norank_o__norank_c__JG30-KF-CM66	OTU1871	4	3	6	4	5	3	5	7	9	0	7	3	56
d__Bacteria	k__norank_d__Bacteria	p__Planctomycetota	c__Planctomycetes	o__Planctomycetales	f__Gimesiaceae	g__norank_f__Gimesiaceae	s__uncultured_Planctomyces_sp._g__norank_f__Gimesiaceae	OTU3946	0	0	2	0	1	0	2	0	1	1	0	1	8
d__Bacteria	k__norank_d__Bacteria	p__Verrucomicrobiota	c__Verrucomicrobiae	o__Pedosphaerales	f__Pedosphaeraceae	g__ADurb.Bin118	s__uncultured_bacterium_g__ADurb.Bin118	OTU531	0	2	1	0	0	0	0	0	1	0	0	0	4
d__Bacteria	k__norank_d__Bacteria	p__Actinobacteriota	c__Actinobacteria	o__Micromonosporales	f__Micromonosporaceae	g__Micromonospora	s__Micromonospora_coxensis	OTU4369	48	33	39	41	49	58	36	36	35	50	44	55	524
d__Bacteria	k__norank_d__Bacteria	p__Proteobacteria	c__Gammaproteobacteria	o__Steroidobacterales	f__Woeseiaceae	g__JTB255_marine_benthic_group	s__uncultured_bacterium_g__JTB255_marine_benthic_group	OTU1042	27	36	36	24	17	29	29	22	23	33	31	33	340
d__Bacteria	k__norank_d__Bacteria	p__Proteobacteria	c__Alphaproteobacteria	o__Rhizobiales	f__unclassified_o__Rhizobiales	g__unclassified_o__Rhizobiales	s__unclassified_o__Rhizobiales	OTU2986	0	1	0	0	2	1	2	0	2	0	2	1	11
d__Bacteria	k__norank_d__Bacteria	p__Planctomycetota	c__Planctomycetes	o__Pirellulales	f__Pirellulaceae	g__Pir4_lineage	s__unclassified_g__Pir4_lineage	OTU3747	1	3	0	0	2	2	2	1	0	0	0	0	11
d__Bacteria	k__norank_d__Bacteria	p__Chloroflexi	c__Anaerolineae	o__SBR1031	f__A4b	g__norank_f__A4b	s__uncultured_bacterium_g__norank_f__A4b	OTU5113	1	0	1	0	1	3	0	0	2	1	6	4	19
d__Bacteria	k__norank_d__Bacteria	p__unclassified_k__norank_d__Bacteria	c__unclassified_k__norank_d__Bacteria	o__unclassified_k__norank_d__Bacteria	f__unclassified_k__norank_d__Bacteria	g__unclassified_k__norank_d__Bacteria	s__unclassified_k__norank_d__Bacteria	OTU5491	0	0	0	0	0	0	0	0	0	0	0	3	3
d__Bacteria	k__norank_d__Bacteria	p__Actinobacteriota	c__Thermoleophilia	o__Gaiellales	f__norank_o__Gaiellales	g__norank_f__norank_o__Gaiellales	s__uncultured_bacterium_g__norank_f__norank_o__Gaiellales	OTU2447	5	0	3	3	3	7	4	3	1	5	5	3	42
d__Bacteria	k__norank_d__Bacteria	p__Proteobacteria	c__Alphaproteobacteria	o__Rhizobiales	f__KF-JG30-B3	g__norank_f__KF-JG30-B3	s__unclassified_g__norank_f__KF-JG30-B3	OTU4570	0	0	0	0	0	1	0	1	1	0	1	0	4
d__Bacteria	k__norank_d__Bacteria	p__Gemmatimonadota	c__Gemmatimonadetes	o__Gemmatimonadales	f__Gemmatimonadaceae	g__norank_f__Gemmatimonadaceae	s__unclassified_g__norank_f__Gemmatimonadaceae	OTU4305	3	9	12	6	4	8	19	6	8	17	14	14	120
d__Bacteria	k__norank_d__Bacteria	p__Firmicutes	c__Desulfotomaculia	o__Desulfotomaculales	f__norank_o__Desulfotomaculales	g__unclassified_f__norank_o__Desulfotomaculales	s__unclassified_f__norank_o__Desulfotomaculales	OTU4104	1	0	0	1	0	0	1	0	0	0	2	0	5
d__Bacteria	k__norank_d__Bacteria	p__Firmicutes	c__Bacilli	o__Thermoactinomycetales	f__Thermoactinomycetaceae	g__Risungbinella	s__unclassified_g__Risungbinella	OTU5146	0	1	1	0	0	0	0	0	0	1	0	0	3
d__Bacteria	k__norank_d__Bacteria	p__Chloroflexi	c__Anaerolineae	o__SBR1031	f__norank_o__SBR1031	g__norank_f__norank_o__SBR1031	s__unclassified_g__norank_f__norank_o__SBR1031	OTU2112	0	0	0	1	1	0	0	0	0	0	0	0	2
d__Bacteria	k__norank_d__Bacteria	p__Actinobacteriota	c__Acidimicrobiia	o__norank_c__Acidimicrobiia	f__norank_o__norank_c__Acidimicrobiia	g__norank_f__norank_o__norank_c__Acidimicrobiia	s__uncultured_bacterium_g__norank_f__norank_o__norank_c__Acidimicrobiia	OTU5311	0	0	2	0	1	1	0	0	0	3	1	0	8
d__Bacteria	k__norank_d__Bacteria	p__Firmicutes	c__Limnochordia	o__Limnochordales	f__Limnochordaceae	g__norank_f__Limnochordaceae	s__uncultured_bacterium_g__norank_f__Limnochordaceae	OTU917	10	5	3	8	7	6	14	4	7	3	6	2	75
d__Bacteria	k__norank_d__Bacteria	p__Planctomycetota	c__OM190	o__norank_c__OM190	f__norank_o__norank_c__OM190	g__norank_f__norank_o__norank_c__OM190	s__unclassified_g__norank_f__norank_o__norank_c__OM190	OTU734	0	0	1	0	0	1	0	0	0	0	0	0	2
d__Bacteria	k__norank_d__Bacteria	p__Chloroflexi	c__Anaerolineae	o__Anaerolineales	f__Anaerolineaceae	g__norank_f__Anaerolineaceae	s__unclassified_g__norank_f__Anaerolineaceae	OTU864	1	0	5	0	2	3	0	1	1	0	2	4	19
d__Bacteria	k__norank_d__Bacteria	p__Actinobacteriota	c__Thermoleophilia	o__Solirubrobacterales	f__Solirubrobacteraceae	g__Solirubrobacter	s__uncultured_bacterium_g__Solirubrobacter	OTU2192	3	3	2	5	3	3	5	1	3	1	1	3	33
d__Bacteria	k__norank_d__Bacteria	p__Proteobacteria	c__Alphaproteobacteria	o__Defluviicoccales	f__norank_o__Defluviicoccales	g__norank_f__norank_o__Defluviicoccales	s__uncultured_Rhizobiales_bacterium_g__norank_f__norank_o__Defluviicoccales	OTU5430	0	0	0	0	0	0	0	0	0	0	1	1	2
d__Bacteria	k__norank_d__Bacteria	p__Chloroflexi	c__Anaerolineae	o__SBR1031	f__A4b	g__norank_f__A4b	s__uncultured_Caldilineaceae_bacterium_g__norank_f__A4b	OTU4217	3	4	7	4	5	5	2	1	1	2	7	5	46
d__Bacteria	k__norank_d__Bacteria	p__Planctomycetota	c__OM190	o__norank_c__OM190	f__norank_o__norank_c__OM190	g__norank_f__norank_o__norank_c__OM190	s__unclassified_g__norank_f__norank_o__norank_c__OM190	OTU5452	0	0	0	0	0	0	0	0	1	0	0	1	2
d__Bacteria	k__norank_d__Bacteria	p__Chloroflexi	c__TK10	o__norank_c__TK10	f__norank_o__norank_c__TK10	g__norank_f__norank_o__norank_c__TK10	s__uncultured_Chloroflexi_bacterium_g__norank_f__norank_o__norank_c__TK10	OTU4228	15	12	18	6	13	18	20	15	24	21	16	13	191
d__Bacteria	k__norank_d__Bacteria	p__Proteobacteria	c__Gammaproteobacteria	o__Burkholderiales	f__Rhodocyclaceae	g__Azoarcus	s__uncultured_bacterium_g__Azoarcus	OTU2161	6	3	9	16	2	3	4	2	4	6	6	2	63
d__Bacteria	k__norank_d__Bacteria	p__Planctomycetota	c__Planctomycetes	o__Pirellulales	f__Pirellulaceae	g__Pirellula	s__unclassified_g__Pirellula	OTU5614	20	14	9	17	13	14	17	20	15	1	23	6	169
d__Bacteria	k__norank_d__Bacteria	p__Actinobacteriota	c__Actinobacteria	o__Micrococcales	f__Microbacteriaceae	g__Microbacterium	s__Microbacterium_testaceum	OTU1523	88	81	93	128	69	85	47	41	38	58	46	52	826
d__Bacteria	k__norank_d__Bacteria	p__SAR324_cladeMarine_group_B	c__norank_p__SAR324_cladeMarine_group_B	o__norank_c__norank_p__SAR324_cladeMarine_group_B	f__norank_o__norank_c__norank_p__SAR324_cladeMarine_group_B	g__norank_f__norank_o__norank_c__norank_p__SAR324_cladeMarine_group_B	s__Candidatus_Nitrosoarchaeum_limnia_SFB1_g__norank_f__norank_o__norank	OTU2973	0	1	1	0	1	0	0	0	1	0	0	0	4
d__Bacteria	k__norank_d__Bacteria	p__SAR324_cladeMarine_group_B	c__norank_p__SAR324_cladeMarine_group_B	o__norank_c__norank_p__SAR324_cladeMarine_group_B	f__norank_o__norank_c__norank_p__SAR324_cladeMarine_group_B	g__norank_f__norank_o__norank_c__norank_p__SAR324_cladeMarine_group_B	s__Candidatus_Nitrosoarchaeum_limnia_SFB1_g__norank_f__norank_o__norank	OTU2975	0	0	1	0	1	0	0	1	0	0	1	0	4
d__Bacteria	k__norank_d__Bacteria	p__Acidobacteriota	c__Subgroup_22	o__norank_c__Subgroup_22	f__norank_o__norank_c__Subgroup_22	g__norank_f__norank_o__norank_c__Subgroup_22	s__uncultured_bacterium_g__norank_f__norank_o__norank_c__Subgroup_22	OTU600	2	1	1	0	0	0	0	2	2	0	0	3	11
d__Bacteria	k__norank_d__Bacteria	p__Planctomycetota	c__Planctomycetes	o__Gemmatales	f__Gemmataceae	g__norank_f__Gemmataceae	s__unclassified_g__norank_f__Gemmataceae	OTU1341	1	0	3	2	0	2	2	5	5	0	0	1	21
d__Bacteria	k__norank_d__Bacteria	p__Chloroflexi	c__JG30-KF-CM66	o__norank_c__JG30-KF-CM66	f__norank_o__norank_c__JG30-KF-CM66	g__norank_f__norank_o__norank_c__JG30-KF-CM66	s__uncultured_Armatimonadetes_bacterium_g__norank_f__norank_o__norank	OTU3054	10	13	18	7	23	22	22	12	20	13	13	18	191
d__Bacteria	k__norank_d__Bacteria	p__Firmicutes	c__Clostridia	o__Peptostreptococcales-Tissierellales	f__norank_o__Peptostreptococcales-Tissierellales	g__unclassified_f__norank_o__Peptostreptococcales-Tissierellales	s__unclassified_f__norank_o__Peptostreptococcales-Tissierellales	OTU536	0	1	0	0	0	0	0	0	0	0	0	1	2
d__Bacteria	k__norank_d__Bacteria	p__Chloroflexi	c__Chloroflexia	o__Thermomicrobiales	f__unclassified_o__Thermomicrobiales	g__unclassified_o__Thermomicrobiales	s__unclassified_o__Thermomicrobiales	OTU1041	2	1	2	3	4	2	1	0	2	1	7	0	25
d__Bacteria	k__norank_d__Bacteria	p__Myxococcota	c__Polyangia	o__Haliangiales	f__Haliangiaceae	g__Haliangium	s__uncultured_bacterium_g__Haliangium	OTU3713	0	0	0	0	0	0	1	0	1	1	1	1	5
d__Bacteria	k__norank_d__Bacteria	p__Firmicutes	c__Bacilli	o__Paenibacillales	f__Paenibacillaceae	g__Saccharibacillus	s__uncultured_bacterium_g__Saccharibacillus	OTU3085	0	0	0	0	15	3	0	0	0	0	0	0	18
d__Bacteria	k__norank_d__Bacteria	p__Proteobacteria	c__Gammaproteobacteria	o__Gammaproteobacteria_Incertae_Sedis	f__unclassified_o__Gammaproteobacteria_Incertae_Sedis	g__Acidibacter	s__uncultured_proteobacterium_g__Acidibacter	OTU1413	70	89	80	70	88	63	90	70	81	104	80	67	952
d__Bacteria	k__norank_d__Bacteria	p__Verrucomicrobiota	c__Verrucomicrobiae	o__Pedosphaerales	f__Pedosphaeraceae	g__norank_f__Pedosphaeraceae	s__unclassified_g__norank_f__Pedosphaeraceae	OTU3590	1	0	3	2	1	0	1	1	1	2	3	3	18
d__Bacteria	k__norank_d__Bacteria	p__Proteobacteria	c__Alphaproteobacteria	o__Rhodospirillales	f__norank_o__Rhodospirillales	g__norank_f__norank_o__Rhodospirillales	s__unclassified_g__norank_f__norank_o__Rhodospirillales	OTU8	2	0	0	0	0	0	0	0	0	0	0	0	2
d__Bacteria	k__norank_d__Bacteria	p__Planctomycetota	c__Planctomycetes	o__Planctomycetales	f__norank_o__Planctomycetales	g__norank_f__norank_o__Planctomycetales	s__unclassified_g__norank_f__norank_o__Planctomycetales	OTU3242	2	0	1	1	2	0	1	0	1	0	0	0	8
d__Bacteria	k__norank_d__Bacteria	p__Actinobacteriota	c__Thermoleophilia	o__Gaiellales	f__Gaiellaceae	g__Gaiella	s__unclassified_g__Gaiella	OTU720	1	1	1	1	0	3	1	0	4	1	1	1	15
d__Bacteria	k__norank_d__Bacteria	p__Firmicutes	c__Bacilli	o__Paenibacillales	f__Paenibacillaceae	g__Paenibacillus	s__unclassified_g__Paenibacillus	OTU5225	0	0	0	1	0	0	0	1	0	1	1	0	4
d__Bacteria	k__norank_d__Bacteria	p__Firmicutes	c__Symbiobacteriia	o__Symbiobacteriales	f__Symbiobacteraceae	g__Symbiobacterium	s__unclassified_g__Symbiobacterium	OTU1812	4	3	6	11	3	1	3	10	5	1	11	4	62
d__Bacteria	k__norank_d__Bacteria	p__Firmicutes	c__Clostridia	o__norank_c__Clostridia	f__Gracilibacteraceae	g__Lutispora	s__unclassified_g__Lutispora	OTU3962	1	1	1	0	3	0	2	1	0	1	2	2	14
d__Bacteria	k__norank_d__Bacteria	p__Firmicutes	c__Clostridia	o__Clostridiales	f__Clostridiaceae	g__Clostridium_sensu_stricto_13	s__unclassified_g__Clostridium_sensu_stricto_13	OTU1339	4	1	6	1	0	3	1	1	3	4	3	2	29
d__Bacteria	k__norank_d__Bacteria	p__unclassified_k__norank_d__Bacteria	c__unclassified_k__norank_d__Bacteria	o__unclassified_k__norank_d__Bacteria	f__unclassified_k__norank_d__Bacteria	g__unclassified_k__norank_d__Bacteria	s__unclassified_k__norank_d__Bacteria	OTU1945	4	6	7	1	1	1	3	1	3	3	1	3	34
d__Bacteria	k__norank_d__Bacteria	p__unclassified_k__norank_d__Bacteria	c__unclassified_k__norank_d__Bacteria	o__unclassified_k__norank_d__Bacteria	f__unclassified_k__norank_d__Bacteria	g__unclassified_k__norank_d__Bacteria	s__unclassified_k__norank_d__Bacteria	OTU1946	39	24	18	16	23	11	8	14	17	15	13	19	217
d__Bacteria	k__norank_d__Bacteria	p__Firmicutes	c__Desulfotomaculia	o__Desulfotomaculales	f__Desulfallas-Sporotomaculum	g__norank_f__Desulfallas-Sporotomaculum	s__uncultured_bacterium_g__norank_f__Desulfallas-Sporotomaculum	OTU569	0	1	0	0	0	0	0	1	0	2	1	0	5
d__Bacteria	k__norank_d__Bacteria	p__Planctomycetota	c__Planctomycetes	o__Planctomycetales	f__norank_o__Planctomycetales	g__norank_f__norank_o__Planctomycetales	s__uncultured_Planctomyces_sp._g__norank_f__norank	OTU890	0	0	1	2	0	2	0	0	1	2	0	1	9
d__Bacteria	k__norank_d__Bacteria	p__Patescibacteria	c__Saccharimonadia	o__Saccharimonadales	f__norank_o__Saccharimonadales	g__norank_f__norank_o__Saccharimonadales	s__uncultured_Candidatus_Saccharibacteria_bacterium_g__norank_f__norank	OTU4677	0	0	0	0	0	0	0	2	0	0	0	0	2
d__Bacteria	k__norank_d__Bacteria	p__Verrucomicrobiota	c__Omnitrophia	o__Omnitrophales	f__norank_o__Omnitrophales	g__norank_f__norank_o__Omnitrophales	s__uncultured_bacterium_g__norank_f__norank_o__Omnitrophales	OTU1541	0	0	1	1	0	0	0	0	0	1	0	1	4
d__Bacteria	k__norank_d__Bacteria	p__Bacteroidota	c__Bacteroidia	o__Flavobacteriales	f__Flavobacteriaceae	g__Vitellibacter	s__uncultured_bacterium_g__Vitellibacter	OTU2304	1	0	0	1	0	0	0	0	0	0	0	1	3
d__Bacteria	k__norank_d__Bacteria	p__Myxococcota	c__Myxococcia	o__Myxococcales	f__Myxococcaceae	g__unclassified_f__Myxococcaceae	s__unclassified_f__Myxococcaceae	OTU3348	3	3	2	6	3	3	4	0	5	2	6	6	43
d__Bacteria	k__norank_d__Bacteria	p__Planctomycetota	c__Planctomycetes	o__Gemmatales	f__Gemmataceae	g__norank_f__Gemmataceae	s__uncultured_bacterium_g__norank_f__Gemmataceae	OTU5353	3	0	2	2	0	1	0	1	1	1	2	1	14
d__Bacteria	k__norank_d__Bacteria	p__Proteobacteria	c__Alphaproteobacteria	o__Rhizobiales	f__Xanthobacteraceae	g__unclassified_f__Xanthobacteraceae	s__unclassified_f__Xanthobacteraceae	OTU4066	32	34	39	34	27	44	49	47	38	49	40	36	469
d__Bacteria	k__norank_d__Bacteria	p__Actinobacteriota	c__Acidimicrobiia	o__IMCC26256	f__norank_o__IMCC26256	g__norank_f__norank_o__IMCC26256	s__unclassified_g__norank_f__norank_o__IMCC26256	OTU3253	0	1	0	0	0	1	1	1	2	1	1	0	8
d__Bacteria	k__norank_d__Bacteria	p__Acidobacteriota	c__Thermoanaerobaculia	o__Thermoanaerobaculales	f__Thermoanaerobaculaceae	g__Subgroup_10	s__uncultured_soil_bacterium_g__Subgroup_10	OTU4034	19	34	13	16	40	24	27	33	64	25	15	15	325
d__Bacteria	k__norank_d__Bacteria	p__Actinobacteriota	c__Actinobacteria	o__KIST-JJY010	f__norank_o__KIST-JJY010	g__norank_f__norank_o__KIST-JJY010	s__uncultured_bacterium_g__norank_f__norank_o__KIST-JJY010	OTU2458	0	0	0	0	1	1	0	0	0	0	0	0	2
d__Bacteria	k__norank_d__Bacteria	p__Actinobacteriota	c__Acidimicrobiia	o__Microtrichales	f__norank_o__Microtrichales	g__norank_f__norank_o__Microtrichales	s__uncultured_compost_bacterium_g__norank_f__norank_o__Microtrichales	OTU248	2	20	15	1	8	3	2	1	4	6	3	4	69
d__Bacteria	k__norank_d__Bacteria	p__Acidobacteriota	c__Blastocatellia	o__Blastocatellales	f__Blastocatellaceae	g__unclassified_f__Blastocatellaceae	s__unclassified_f__Blastocatellaceae	OTU4412	18	14	34	27	15	11	14	26	27	11	34	26	257
d__Bacteria	k__norank_d__Bacteria	p__Planctomycetota	c__Planctomycetes	o__Gemmatales	f__Gemmataceae	g__norank_f__Gemmataceae	s__uncultured_bacterium_g__norank_f__Gemmataceae	OTU1505	2	4	5	11	5	6	3	4	8	1	5	9	63
d__Bacteria	k__norank_d__Bacteria	p__Patescibacteria	c__Saccharimonadia	o__Saccharimonadales	f__LWQ8	g__norank_f__LWQ8	s__uncultured_bacterium_g__norank_f__LWQ8	OTU2156	0	0	1	1	1	1	0	0	0	0	0	0	4
d__Bacteria	k__norank_d__Bacteria	p__Proteobacteria	c__Gammaproteobacteria	o__Diplorickettsiales	f__Diplorickettsiaceae	g__norank_f__Diplorickettsiaceae	s__uncultured_bacterium_g__norank_f__Diplorickettsiaceae	OTU2506	0	0	0	0	2	1	0	0	0	1	0	0	4
d__Bacteria	k__norank_d__Bacteria	p__Verrucomicrobiota	c__Chlamydiae	o__Chlamydiales	f__unclassified_o__Chlamydiales	g__unclassified_o__Chlamydiales	s__unclassified_o__Chlamydiales	OTU2245	0	1	0	1	1	0	0	0	0	0	1	0	4
d__Bacteria	k__norank_d__Bacteria	p__Proteobacteria	c__Alphaproteobacteria	o__Rhizobiales	f__Xanthobacteraceae	g__Rhodoplanes	s__uncultured_bacterium_g__Rhodoplanes	OTU5221	0	0	0	1	2	2	1	2	0	1	1	1	11
d__Bacteria	k__norank_d__Bacteria	p__Proteobacteria	c__Alphaproteobacteria	o__unclassified_c__Alphaproteobacteria	f__unclassified_c__Alphaproteobacteria	g__unclassified_c__Alphaproteobacteria	s__unclassified_c__Alphaproteobacteria	OTU2510	0	0	1	0	1	1	0	0	0	0	0	2	5
d__Bacteria	k__norank_d__Bacteria	p__Actinobacteriota	c__MB-A2-108	o__norank_c__MB-A2-108	f__norank_o__norank_c__MB-A2-108	g__norank_f__norank_o__norank_c__MB-A2-108	s__unclassified_g__norank_f__norank_o__norank_c__MB-A2-108	OTU4612	0	2	1	1	1	1	3	6	2	0	4	2	23
d__Bacteria	k__norank_d__Bacteria	p__Bdellovibrionota	c__Oligoflexia	o__0319-6G20	f__norank_o__0319-6G20	g__norank_f__norank_o__0319-6G20	s__unclassified_g__norank_f__norank_o__0319-6G20	OTU748	2	3	3	2	4	1	4	4	5	2	0	2	32
d__Bacteria	k__norank_d__Bacteria	p__Cyanobacteria	c__Vampirivibrionia	o__Obscuribacterales	f__Obscuribacteraceae	g__norank_f__Obscuribacteraceae	s__uncultured_bacterium_g__norank_f__Obscuribacteraceae	OTU328	0	1	0	0	0	0	0	0	0	0	0	1	2
d__Bacteria	k__norank_d__Bacteria	p__NB1-j	c__norank_p__NB1-j	o__norank_c__norank_p__NB1-j	f__norank_o__norank_c__norank_p__NB1-j	g__norank_f__norank_o__norank_c__norank_p__NB1-j	s__unclassified_g__norank_f__norank_o__norank_c__norank_p__NB1-j	OTU5171	0	1	1	0	0	0	2	1	0	2	2	2	11
d__Bacteria	k__norank_d__Bacteria	p__NB1-j	c__norank_p__NB1-j	o__norank_c__norank_p__NB1-j	f__norank_o__norank_c__norank_p__NB1-j	g__norank_f__norank_o__norank_c__norank_p__NB1-j	s__unclassified_g__norank_f__norank_o__norank_c__norank_p__NB1-j	OTU5177	0	0	0	0	0	0	0	1	0	1	1	0	3
d__Bacteria	k__norank_d__Bacteria	p__Chloroflexi	c__Chloroflexia	o__Thermomicrobiales	f__AKYG1722	g__norank_f__AKYG1722	s__unclassified_g__norank_f__AKYG1722	OTU5549	2	0	0	1	0	0	0	1	0	0	1	0	5
d__Bacteria	k__norank_d__Bacteria	p__Bacteroidota	c__Ignavibacteria	o__Ignavibacteriales	f__Ignavibacteriaceae	g__Ignavibacterium	s__unclassified_g__Ignavibacterium	OTU1791	2	9	9	4	14	5	8	7	9	3	4	7	81
d__Bacteria	k__norank_d__Bacteria	p__Myxococcota	c__Polyangia	o__Polyangiales	f__Eel-36e1D6	g__norank_f__Eel-36e1D6	s__unclassified_g__norank_f__Eel-36e1D6	OTU597	2	1	1	3	2	2	6	1	2	1	3	0	24
d__Bacteria	k__norank_d__Bacteria	p__Planctomycetota	c__Planctomycetes	o__Planctomycetales	f__Rubinisphaeraceae	g__SH-PL14	s__unclassified_g__SH-PL14	OTU1481	0	0	4	2	0	0	0	0	1	0	0	1	8
d__Bacteria	k__norank_d__Bacteria	p__Bacteroidota	c__Kryptonia	o__Kryptoniales	f__BSV26	g__norank_f__BSV26	s__unclassified_g__norank_f__BSV26	OTU1590	1	1	1	0	1	1	0	2	0	0	1	1	9
d__Bacteria	k__norank_d__Bacteria	p__Bdellovibrionota	c__Oligoflexia	o__0319-6G20	f__norank_o__0319-6G20	g__norank_f__norank_o__0319-6G20	s__unclassified_g__norank_f__norank_o__0319-6G20	OTU3655	0	0	0	0	0	0	1	0	0	0	0	1	2
d__Bacteria	k__norank_d__Bacteria	p__Myxococcota	c__Polyangia	o__Polyangiales	f__Sandaracinaceae	g__unclassified_f__Sandaracinaceae	s__unclassified_f__Sandaracinaceae	OTU4966	2	2	1	0	0	4	0	0	1	3	2	4	19
d__Bacteria	k__norank_d__Bacteria	p__Actinobacteriota	c__Thermoleophilia	o__Gaiellales	f__unclassified_o__Gaiellales	g__unclassified_o__Gaiellales	s__unclassified_o__Gaiellales	OTU4378	42	46	47	39	44	71	23	36	44	78	64	52	586
d__Bacteria	k__norank_d__Bacteria	p__Chloroflexi	c__Chloroflexia	o__Thermomicrobiales	f__JG30-KF-CM45	g__norank_f__JG30-KF-CM45	s__uncultured_bacterium_g__norank_f__JG30-KF-CM45	OTU1893	17	7	8	15	15	8	11	12	10	20	13	7	143
d__Bacteria	k__norank_d__Bacteria	p__Firmicutes	c__Bacilli	o__Thermoactinomycetales	f__Thermoactinomycetaceae	g__unclassified_f__Thermoactinomycetaceae	s__unclassified_f__Thermoactinomycetaceae	OTU2298	1	0	0	0	0	0	0	2	0	1	0	0	4
d__Bacteria	k__norank_d__Bacteria	p__Actinobacteriota	c__Actinobacteria	o__Micromonosporales	f__Micromonosporaceae	g__unclassified_f__Micromonosporaceae	s__unclassified_f__Micromonosporaceae	OTU1782	23	36	11	44	58	39	21	8	17	30	34	24	345
d__Bacteria	k__norank_d__Bacteria	p__Patescibacteria	c__Saccharimonadia	o__Saccharimonadales	f__S32	g__TM7	s__uncultured_Candidatus_Saccharibacteria_bacterium_g__TM7	OTU425	4	3	4	0	3	2	1	2	3	1	2	3	28
d__Bacteria	k__norank_d__Bacteria	p__Acidobacteriota	c__Vicinamibacteria	o__Subgroup_17	f__norank_o__Subgroup_17	g__norank_f__norank_o__Subgroup_17	s__uncultured_Acidobacteriales_bacterium_g__norank_f__norank_o__Subgroup_17	OTU4249	14	7	12	7	10	3	12	19	20	8	14	11	137
d__Bacteria	k__norank_d__Bacteria	p__unclassified_k__norank_d__Bacteria	c__unclassified_k__norank_d__Bacteria	o__unclassified_k__norank_d__Bacteria	f__unclassified_k__norank_d__Bacteria	g__unclassified_k__norank_d__Bacteria	s__unclassified_k__norank_d__Bacteria	OTU2445	0	0	0	0	1	0	0	0	2	1	0	0	4
d__Bacteria	k__norank_d__Bacteria	p__Patescibacteria	c__Saccharimonadia	o__Saccharimonadales	f__norank_o__Saccharimonadales	g__norank_f__norank_o__Saccharimonadales	s__unclassified_g__norank_f__norank_o__Saccharimonadales	OTU2612	2	0	0	0	1	1	0	0	0	0	0	0	4
d__Bacteria	k__norank_d__Bacteria	p__Planctomycetota	c__Phycisphaerae	o__Phycisphaerales	f__Phycisphaeraceae	g__AKYG587	s__unclassified_g__AKYG587	OTU2115	0	0	0	1	0	0	0	0	0	0	0	0	1
d__Bacteria	k__norank_d__Bacteria	p__Bdellovibrionota	c__Bdellovibrionia	o__Bdellovibrionales	f__Bdellovibrionaceae	g__OM27_clade	s__unclassified_g__OM27_clade	OTU2773	0	0	1	2	3	1	2	1	0	0	0	1	11
d__Bacteria	k__norank_d__Bacteria	p__Firmicutes	c__Bacilli	o__Lactobacillales	f__Lactobacillaceae	g__Lactobacillus	s__Lactobacillus_murinus	OTU4485	0	0	0	0	0	0	0	2	0	0	0	0	2
d__Bacteria	k__norank_d__Bacteria	p__Proteobacteria	c__Alphaproteobacteria	o__Rhizobiales	f__norank_o__Rhizobiales	g__norank_f__norank_o__Rhizobiales	s__uncultured_Alphaproteobacteria_bacterium_g__norank_f__norank_o__Rhizobiales	OTU2176	1	1	1	6	5	0	5	4	5	4	1	2	35
d__Bacteria	k__norank_d__Bacteria	p__Firmicutes	c__Clostridia	o__Peptostreptococcales-Tissierellales	f__norank_o__Peptostreptococcales-Tissierellales	g__Sporanaerobacter	s__unclassified_g__Sporanaerobacter	OTU4851	0	0	0	0	1	0	0	1	0	0	0	0	2
d__Bacteria	k__norank_d__Bacteria	p__Chloroflexi	c__Anaerolineae	o__SBR1031	f__norank_o__SBR1031	g__norank_f__norank_o__SBR1031	s__uncultured_soil_bacterium_g__norank_f__norank_o__SBR1031	OTU601	0	2	0	0	0	0	0	0	0	0	0	0	2
d__Bacteria	k__norank_d__Bacteria	p__Chloroflexi	c__Anaerolineae	o__Caldilineales	f__Caldilineaceae	g__norank_f__Caldilineaceae	s__unclassified_g__norank_f__Caldilineaceae	OTU3099	0	0	0	2	3	1	0	0	1	0	0	0	7
d__Bacteria	k__norank_d__Bacteria	p__Myxococcota	c__Myxococcia	o__Myxococcales	f__Myxococcaceae	g__unclassified_f__Myxococcaceae	s__unclassified_f__Myxococcaceae	OTU4955	0	0	0	0	0	0	0	0	1	1	1	0	3
d__Bacteria	k__norank_d__Bacteria	p__Firmicutes	c__Clostridia	o__Peptostreptococcales-Tissierellales	f__norank_o__Peptostreptococcales-Tissierellales	g__Tepidimicrobium	s__Clostridium_sp._MT1	OTU5488	7	7	4	1	6	1	2	2	4	9	12	4	59
d__Bacteria	k__norank_d__Bacteria	p__Chloroflexi	c__Anaerolineae	o__SBR1031	f__A4b	g__norank_f__A4b	s__uncultured_gamma_proteobacterium_g__norank_f__A4b	OTU4712	0	1	0	0	2	0	0	1	0	1	0	0	5
d__Bacteria	k__norank_d__Bacteria	p__Acidobacteriota	c__Thermoanaerobaculia	o__Thermoanaerobaculales	f__Thermoanaerobaculaceae	g__Subgroup_10	s__unclassified_g__Subgroup_10	OTU5005	0	0	0	0	0	0	0	2	0	1	1	1	5
d__Bacteria	k__norank_d__Bacteria	p__Actinobacteriota	c__Actinobacteria	o__Micromonosporales	f__Micromonosporaceae	g__Luedemannella	s__unclassified_g__Luedemannella	OTU3041	2	2	2	1	5	1	1	2	5	6	0	2	29
d__Bacteria	k__norank_d__Bacteria	p__Gemmatimonadota	c__S0134_terrestrial_group	o__norank_c__S0134_terrestrial_group	f__norank_o__norank_c__S0134_terrestrial_group	g__norank_f__norank_o__norank_c__S0134_terrestrial_group	s__uncultured_bacterium_g__norank_f__norank_o__norank_c__S0134_terrestrial_group	OTU5381	15	21	14	12	12	10	36	22	29	30	32	26	259
d__Bacteria	k__norank_d__Bacteria	p__Proteobacteria	c__Gammaproteobacteria	o__unclassified_c__Gammaproteobacteria	f__unclassified_c__Gammaproteobacteria	g__unclassified_c__Gammaproteobacteria	s__unclassified_c__Gammaproteobacteria	OTU3832	2	5	7	2	2	1	6	3	1	4	8	3	44
d__Bacteria	k__norank_d__Bacteria	p__Patescibacteria	c__Saccharimonadia	o__Saccharimonadales	f__unclassified_o__Saccharimonadales	g__unclassified_o__Saccharimonadales	s__unclassified_o__Saccharimonadales	OTU2555	0	0	0	0	1	0	0	0	0	0	0	0	1
d__Bacteria	k__norank_d__Bacteria	p__Dependentiae	c__Babeliae	o__Babeliales	f__UBA12409	g__norank_f__UBA12409	s__uncultured_bacterium_g__norank_f__UBA12409	OTU5242	0	1	0	0	0	1	0	1	0	1	0	0	4
d__Bacteria	k__norank_d__Bacteria	p__Acidobacteriota	c__AT-s3-28	o__norank_c__AT-s3-28	f__norank_o__norank_c__AT-s3-28	g__norank_f__norank_o__norank_c__AT-s3-28	s__uncultured_bacterium_g__norank_f__norank_o__norank_c__AT-s3-28	OTU2081	4	2	0	0	0	0	0	3	1	0	0	1	11
d__Bacteria	k__norank_d__Bacteria	p__Chloroflexi	c__Dehalococcoidia	o__S085	f__norank_o__S085	g__norank_f__norank_o__S085	s__uncultured_soil_bacterium_g__norank_f__norank_o__S085	OTU5060	14	10	15	9	10	21	13	18	10	19	21	25	185
d__Bacteria	k__norank_d__Bacteria	p__Actinobacteriota	c__Actinobacteria	o__Micrococcales	f__Microbacteriaceae	g__Agromyces	s__unclassified_g__Agromyces	OTU1109	42	40	47	37	41	46	39	38	36	48	39	27	480
d__Bacteria	k__norank_d__Bacteria	p__Acidobacteriota	c__Subgroup_22	o__norank_c__Subgroup_22	f__norank_o__norank_c__Subgroup_22	g__norank_f__norank_o__norank_c__Subgroup_22	s__unclassified_g__norank_f__norank_o__norank_c__Subgroup_22	OTU2231	0	1	2	4	2	0	2	3	0	4	2	1	21
d__Bacteria	k__norank_d__Bacteria	p__Acidobacteriota	c__Vicinamibacteria	o__Vicinamibacterales	f__Vicinamibacteraceae	g__norank_f__Vicinamibacteraceae	s__unclassified_g__norank_f__Vicinamibacteraceae	OTU981	115	114	147	154	112	90	151	197	168	66	152	180	1646
d__Bacteria	k__norank_d__Bacteria	p__Chloroflexi	c__Dehalococcoidia	o__SAR202_clade	f__norank_o__SAR202_clade	g__norank_f__norank_o__SAR202_clade	s__unclassified_g__norank_f__norank_o__SAR202_clade	OTU3174	0	0	0	0	0	1	0	0	0	0	0	1	2
d__Bacteria	k__norank_d__Bacteria	p__Verrucomicrobiota	c__Verrucomicrobiae	o__Verrucomicrobiales	f__Verrucomicrobiaceae	g__Roseimicrobium	s__unclassified_g__Roseimicrobium	OTU2755	1	2	0	0	4	1	0	1	1	1	1	0	12
d__Bacteria	k__norank_d__Bacteria	p__Elusimicrobiota	c__Elusimicrobia	o__MVP-88	f__norank_o__MVP-88	g__norank_f__norank_o__MVP-88	s__uncultured_bacterium_g__norank_f__norank_o__MVP-88	OTU2136	0	0	0	1	0	1	1	0	0	0	1	0	4
d__Bacteria	k__norank_d__Bacteria	p__Armatimonadota	c__Armatimonadia	o__Armatimonadales	f__norank_o__Armatimonadales	g__norank_f__norank_o__Armatimonadales	s__unclassified_g__norank_f__norank_o__Armatimonadales	OTU3222	0	0	0	0	0	0	2	0	0	0	0	0	2
d__Bacteria	k__norank_d__Bacteria	p__Chloroflexi	c__Anaerolineae	o__Caldilineales	f__Caldilineaceae	g__norank_f__Caldilineaceae	s__unclassified_g__norank_f__Caldilineaceae	OTU4028	0	1	4	2	8	5	4	3	3	2	2	4	38
d__Bacteria	k__norank_d__Bacteria	p__unclassified_k__norank_d__Bacteria	c__unclassified_k__norank_d__Bacteria	o__unclassified_k__norank_d__Bacteria	f__unclassified_k__norank_d__Bacteria	g__unclassified_k__norank_d__Bacteria	s__unclassified_k__norank_d__Bacteria	OTU5536	0	0	0	1	0	0	0	1	0	1	0	1	4
d__Bacteria	k__norank_d__Bacteria	p__Firmicutes	c__Bacilli	o__Bacillales	f__Bacillaceae	g__unclassified_f__Bacillaceae	s__unclassified_f__Bacillaceae	OTU3036	2	0	0	0	1	0	0	0	0	1	0	0	4
d__Bacteria	k__norank_d__Bacteria	p__Gemmatimonadota	c__BD2-11_terrestrial_group	o__norank_c__BD2-11_terrestrial_group	f__norank_o__norank_c__BD2-11_terrestrial_group	g__norank_f__norank_o__norank_c__BD2-11_terrestrial_group	s__unclassified_g__norank_f__norank_o__norank_c__BD2-11_terrestrial_group	OTU4424	0	1	1	0	1	0	1	1	1	0	2	0	8
d__Bacteria	k__norank_d__Bacteria	p__Planctomycetota	c__Planctomycetes	o__Pirellulales	f__Pirellulaceae	g__Blastopirellula	s__metagenome_g__Blastopirellula	OTU4411	16	12	11	10	8	5	10	16	11	3	7	18	127
d__Bacteria	k__norank_d__Bacteria	p__Planctomycetota	c__unclassified_p__Planctomycetota	o__unclassified_p__Planctomycetota	f__unclassified_p__Planctomycetota	g__unclassified_p__Planctomycetota	s__unclassified_p__Planctomycetota	OTU3124	0	0	0	0	0	1	0	0	0	0	0	1	2
d__Bacteria	k__norank_d__Bacteria	p__Planctomycetota	c__Planctomycetes	o__Gemmatales	f__Gemmataceae	g__norank_f__Gemmataceae	s__uncultured_bacterium_g__norank_f__Gemmataceae	OTU1769	0	3	4	3	1	0	2	3	1	1	3	1	22
d__Bacteria	k__norank_d__Bacteria	p__Planctomycetota	c__Phycisphaerae	o__Phycisphaerales	f__Phycisphaeraceae	g__AKYG587	s__uncultured_planctomycete_g__AKYG587	OTU5270	2	1	1	0	3	1	0	0	0	5	2	1	16
d__Bacteria	k__norank_d__Bacteria	p__Bacteroidota	c__SJA-28	o__norank_c__SJA-28	f__norank_o__norank_c__SJA-28	g__norank_f__norank_o__norank_c__SJA-28	s__uncultured_soil_bacterium_g__norank_f__norank_o__norank_c__SJA-28	OTU1706	0	0	0	0	0	0	1	0	0	0	0	0	1
d__Bacteria	k__norank_d__Bacteria	p__Chloroflexi	c__Anaerolineae	o__Anaerolineales	f__Anaerolineaceae	g__norank_f__Anaerolineaceae	s__unclassified_g__norank_f__Anaerolineaceae	OTU2098	11	16	13	21	12	16	8	4	6	6	18	14	145
d__Bacteria	k__norank_d__Bacteria	p__Bdellovibrionota	c__Oligoflexia	o__0319-6G20	f__norank_o__0319-6G20	g__norank_f__norank_o__0319-6G20	s__uncultured_bacterium_g__norank_f__norank_o__0319-6G20	OTU4081	3	7	7	3	2	4	4	0	4	3	4	5	46
d__Bacteria	k__norank_d__Bacteria	p__Proteobacteria	c__Gammaproteobacteria	o__Diplorickettsiales	f__Diplorickettsiaceae	g__norank_f__Diplorickettsiaceae	s__unclassified_g__norank_f__Diplorickettsiaceae	OTU5183	0	0	0	2	0	2	0	0	0	1	0	0	5
d__Bacteria	k__norank_d__Bacteria	p__Actinobacteriota	c__Actinobacteria	o__Micrococcales	f__Cellulomonadaceae	g__Actinotalea	s__uncultured_bacterium_g__Actinotalea	OTU3370	6	9	2	4	5	3	4	3	1	5	6	5	53
d__Bacteria	k__norank_d__Bacteria	p__Firmicutes	c__norank_p__Firmicutes	o__norank_c__norank_p__Firmicutes	f__norank_o__norank_c__norank_p__Firmicutes	g__norank_f__norank_o__norank_c__norank_p__Firmicutes	s__anaerobic_digester_metagenome_g__norank_f__norank	OTU5234	2	0	0	0	0	0	0	1	0	2	1	0	6
d__Bacteria	k__norank_d__Bacteria	p__Proteobacteria	c__Gammaproteobacteria	o__Burkholderiales	f__TRA3-20	g__norank_f__TRA3-20	s__unclassified_g__norank_f__TRA3-20	OTU832	64	91	79	47	53	47	84	64	64	83	69	88	833
d__Bacteria	k__norank_d__Bacteria	p__Gemmatimonadota	c__Gemmatimonadetes	o__Gemmatimonadales	f__Gemmatimonadaceae	g__norank_f__Gemmatimonadaceae	s__uncultured_prokaryote_g__norank_f__Gemmatimonadaceae	OTU3672	0	0	0	0	0	0	1	1	0	0	0	0	2
d__Bacteria	k__norank_d__Bacteria	p__Firmicutes	c__Syntrophomonadia	o__Syntrophomonadales	f__Syntrophomonadaceae	g__norank_f__Syntrophomonadaceae	s__uncultured_prokaryote_g__norank_f__Syntrophomonadaceae	OTU2524	0	0	1	0	2	1	2	2	0	3	0	0	11
d__Bacteria	k__norank_d__Bacteria	p__Firmicutes	c__Bacilli	o__Bacillales	f__Bacillaceae	g__Calditerricola	s__unclassified_g__Calditerricola	OTU3289	1	2	0	1	0	3	1	3	1	1	2	2	17
d__Bacteria	k__norank_d__Bacteria	p__Planctomycetota	c__OM190	o__norank_c__OM190	f__norank_o__norank_c__OM190	g__norank_f__norank_o__norank_c__OM190	s__unclassified_g__norank_f__norank_o__norank_c__OM190	OTU2615	0	1	1	1	2	0	0	1	1	0	0	2	9
d__Bacteria	k__norank_d__Bacteria	p__Bdellovibrionota	c__Bdellovibrionia	o__Bdellovibrionales	f__Bdellovibrionaceae	g__Bdellovibrio	s__unclassified_g__Bdellovibrio	OTU5287	0	0	1	0	0	0	0	0	1	1	0	0	3
d__Bacteria	k__norank_d__Bacteria	p__Firmicutes	c__Bacilli	o__Paenibacillales	f__Paenibacillaceae	g__Paenibacillus	s__uncultured_compost_bacterium_g__Paenibacillus	OTU4922	1	2	1	0	2	1	0	0	2	0	1	2	12
d__Bacteria	k__norank_d__Bacteria	p__Chloroflexi	c__Anaerolineae	o__SBR1031	f__A4b	g__norank_f__A4b	s__uncultured_bacterium_g__norank_f__A4b	OTU3183	0	1	0	0	0	1	0	1	1	0	0	0	4
d__Bacteria	k__norank_d__Bacteria	p__Firmicutes	c__Thermacetogenia	o__Thermacetogeniales	f__Thermacetogeniaceae	g__Syntrophaceticus	s__uncultured_bacterium_g__Syntrophaceticus	OTU2287	0	1	0	2	1	0	0	1	0	0	1	0	6
d__Bacteria	k__norank_d__Bacteria	p__Actinobacteriota	c__Acidimicrobiia	o__IMCC26256	f__norank_o__IMCC26256	g__norank_f__norank_o__IMCC26256	s__metagenome_g__norank_f__norank_o__IMCC26256	OTU4771	4	9	4	5	4	4	8	7	4	8	7	5	69
d__Bacteria	k__norank_d__Bacteria	p__Verrucomicrobiota	c__Verrucomicrobiae	o__Pedosphaerales	f__Pedosphaeraceae	g__ADurb.Bin063-1	s__uncultured_bacterium_g__ADurb.Bin063-1	OTU3674	1	0	4	1	3	4	1	1	6	0	1	1	23
d__Bacteria	k__norank_d__Bacteria	p__Proteobacteria	c__Alphaproteobacteria	o__Rhizobiales	f__Rhizobiales_Incertae_Sedis	g__Bauldia	s__metagenome_g__Bauldia	OTU347	3	4	3	5	2	3	4	4	3	9	1	3	44
d__Bacteria	k__norank_d__Bacteria	p__Patescibacteria	c__Microgenomatia	o__Candidatus_Woykebacteria	f__norank_o__Candidatus_Woykebacteria	g__norank_f__norank_o__Candidatus_Woykebacteria	s__uncultured_bacterium_g__norank_f__norank_o__Candidatus_Woykebacteria	OTU2518	0	0	0	0	1	0	0	0	0	0	1	0	2
d__Bacteria	k__norank_d__Bacteria	p__Chloroflexi	c__Chloroflexia	o__Chloroflexales	f__Herpetosiphonaceae	g__Herpetosiphon	s__unclassified_g__Herpetosiphon	OTU2738	0	0	1	4	3	0	0	0	0	0	0	1	9
d__Bacteria	k__norank_d__Bacteria	p__Methylomirabilota	c__Methylomirabilia	o__Rokubacteriales	f__norank_o__Rokubacteriales	g__norank_f__norank_o__Rokubacteriales	s__uncultured_bacterium_g__norank_f__norank_o__Rokubacteriales	OTU1901	41	37	38	29	46	40	67	70	71	57	63	48	607
d__Bacteria	k__norank_d__Bacteria	p__Proteobacteria	c__Alphaproteobacteria	o__Rhizobiales	f__norank_o__Rhizobiales	g__norank_f__norank_o__Rhizobiales	s__uncultured_bacterium_g__norank_f__norank_o__Rhizobiales	OTU3913	6	10	5	9	13	4	6	5	3	8	5	2	76
d__Bacteria	k__norank_d__Bacteria	p__Patescibacteria	c__Microgenomatia	o__norank_c__Microgenomatia	f__norank_o__norank_c__Microgenomatia	g__norank_f__norank_o__norank_c__Microgenomatia	s__uncultured_soil_bacterium_g__norank_f__norank_o__norank_c__Microgenomatia	OTU5411	2	1	1	2	0	2	0	1	0	2	1	0	12
d__Bacteria	k__norank_d__Bacteria	p__Proteobacteria	c__Alphaproteobacteria	o__Rickettsiales	f__SM2D12	g__norank_f__SM2D12	s__unclassified_g__norank_f__SM2D12	OTU2830	0	0	1	0	1	0	0	0	0	0	0	1	3
d__Bacteria	k__norank_d__Bacteria	p__Proteobacteria	c__Gammaproteobacteria	o__unclassified_c__Gammaproteobacteria	f__unclassified_c__Gammaproteobacteria	g__unclassified_c__Gammaproteobacteria	s__unclassified_c__Gammaproteobacteria	OTU2493	3	5	3	2	6	0	0	1	4	1	0	0	25
d__Bacteria	k__norank_d__Bacteria	p__Bacteroidota	c__Bacteroidia	o__Cytophagales	f__Cyclobacteriaceae	g__Tunicatimonas	s__uncultured_bacterium_g__Tunicatimonas	OTU1641	2	2	1	3	3	2	0	1	2	0	3	0	19
d__Bacteria	k__norank_d__Bacteria	p__Desulfobacterota	c__Desulfuromonadia	o__Bradymonadales	f__Bradymonadaceae	g__Bradymonas	s__uncultured_Desulfuromonas_sp._g__Bradymonas	OTU420	0	1	0	0	0	0	0	1	0	0	0	0	2
d__Bacteria	k__norank_d__Bacteria	p__Firmicutes	c__Bacilli	o__Bacillales	f__Bacillaceae	g__Bacillus	s__unclassified_g__Bacillus	OTU5402	149	174	157	165	137	143	221	235	272	300	249	221	2423
d__Bacteria	k__norank_d__Bacteria	p__Myxococcota	c__Polyangia	o__Polyangiales	f__Polyangiaceae	g__Sorangium	s__unclassified_g__Sorangium	OTU4943	0	0	0	0	1	0	1	0	2	2	0	0	6
d__Bacteria	k__norank_d__Bacteria	p__Proteobacteria	c__Alphaproteobacteria	o__unclassified_c__Alphaproteobacteria	f__unclassified_c__Alphaproteobacteria	g__unclassified_c__Alphaproteobacteria	s__unclassified_c__Alphaproteobacteria	OTU3838	4	2	4	3	6	5	6	6	4	6	8	5	59
d__Bacteria	k__norank_d__Bacteria	p__Firmicutes	c__Bacilli	o__Paenibacillales	f__Paenibacillaceae	g__Paenibacillus	s__unclassified_g__Paenibacillus	OTU5374	1	0	0	1	0	0	1	0	1	1	1	0	6
d__Bacteria	k__norank_d__Bacteria	p__Firmicutes	c__Bacilli	o__Bacillales	f__Bacillaceae	g__Bacillus	s__Bacillus_decolorationis	OTU3524	20	12	17	8	13	8	22	22	16	27	18	24	207
d__Bacteria	k__norank_d__Bacteria	p__Actinobacteriota	c__Actinobacteria	o__Pseudonocardiales	f__Pseudonocardiaceae	g__Pseudonocardia	s__uncultured_bacterium_g__Pseudonocardia	OTU456	1	4	2	0	3	4	3	0	5	4	3	2	31
d__Bacteria	k__norank_d__Bacteria	p__Planctomycetota	c__Planctomycetes	o__Gemmatales	f__Gemmataceae	g__norank_f__Gemmataceae	s__metagenome_g__norank_f__Gemmataceae	OTU1456	2	3	4	3	1	4	1	5	3	3	3	7	39
d__Bacteria	k__norank_d__Bacteria	p__Proteobacteria	c__Gammaproteobacteria	o__Diplorickettsiales	f__Diplorickettsiaceae	g__Aquicella	s__unclassified_g__Aquicella	OTU5082	4	1	0	1	1	0	1	0	1	1	0	2	12
d__Bacteria	k__norank_d__Bacteria	p__Gemmatimonadota	c__Gemmatimonadetes	o__Gemmatimonadales	f__Gemmatimonadaceae	g__norank_f__Gemmatimonadaceae	s__unclassified_g__norank_f__Gemmatimonadaceae	OTU3300	1	0	0	2	0	0	1	0	0	0	0	0	4
d__Bacteria	k__norank_d__Bacteria	p__Patescibacteria	c__Saccharimonadia	o__Saccharimonadales	f__unclassified_o__Saccharimonadales	g__unclassified_o__Saccharimonadales	s__unclassified_o__Saccharimonadales	OTU5051	0	0	0	0	0	1	0	0	1	1	1	0	4
d__Bacteria	k__norank_d__Bacteria	p__Myxococcota	c__Polyangia	o__Polyangiales	f__Sandaracinaceae	g__norank_f__Sandaracinaceae	s__metagenome_g__norank_f__Sandaracinaceae	OTU3156	1	1	0	0	1	1	0	0	1	2	2	0	9
d__Bacteria	k__norank_d__Bacteria	p__Proteobacteria	c__Gammaproteobacteria	o__Diplorickettsiales	f__Diplorickettsiaceae	g__norank_f__Diplorickettsiaceae	s__uncultured_Coxiellaceae_bacterium_g__norank_f__Diplorickettsiaceae	OTU3974	1	0	1	0	0	0	1	0	0	0	0	0	3
d__Bacteria	k__norank_d__Bacteria	p__Methylomirabilota	c__Methylomirabilia	o__Rokubacteriales	f__norank_o__Rokubacteriales	g__norank_f__norank_o__Rokubacteriales	s__uncultured_bacterium_g__norank_f__norank_o__Rokubacteriales	OTU3503	6	4	3	9	3	6	15	7	7	8	5	4	77
d__Bacteria	k__norank_d__Bacteria	p__unclassified_k__norank_d__Bacteria	c__unclassified_k__norank_d__Bacteria	o__unclassified_k__norank_d__Bacteria	f__unclassified_k__norank_d__Bacteria	g__unclassified_k__norank_d__Bacteria	s__unclassified_k__norank_d__Bacteria	OTU4842	0	0	0	0	0	0	0	1	1	0	0	0	2
d__Bacteria	k__norank_d__Bacteria	p__Proteobacteria	c__Gammaproteobacteria	o__Diplorickettsiales	f__Diplorickettsiaceae	g__Aquicella	s__uncultured_bacterium_g__Aquicella	OTU3942	0	2	0	1	0	0	6	2	3	2	1	0	17
d__Bacteria	k__norank_d__Bacteria	p__Proteobacteria	c__Alphaproteobacteria	o__Sphingomonadales	f__Sphingomonadaceae	g__Altererythrobacter	s__unclassified_g__Altererythrobacter	OTU3028	0	0	0	0	1	0	0	2	0	0	0	0	3
d__Bacteria	k__norank_d__Bacteria	p__Planctomycetota	c__Planctomycetes	o__Planctomycetales	f__norank_o__Planctomycetales	g__norank_f__norank_o__Planctomycetales	s__uncultured_bacterium_g__norank_f__norank_o__Planctomycetales	OTU3537	25	24	23	24	21	13	5	21	8	8	13	13	198
d__Bacteria	k__norank_d__Bacteria	p__Proteobacteria	c__Alphaproteobacteria	o__Puniceispirillales	f__EF100-94H03	g__norank_f__EF100-94H03	s__uncultured_bacterium_g__norank_f__EF100-94H03	OTU5354	0	0	0	1	0	0	0	0	0	0	2	0	3
d__Bacteria	k__norank_d__Bacteria	p__Acidobacteriota	c__Blastocatellia	o__11-24	f__norank_o__11-24	g__norank_f__norank_o__11-24	s__uncultured_bacterium_g__norank_f__norank_o__11-24	OTU4649	1	1	0	0	0	0	1	2	0	1	0	0	6
d__Bacteria	k__norank_d__Bacteria	p__Latescibacterota	c__norank_p__Latescibacterota	o__norank_c__norank_p__Latescibacterota	f__norank_o__norank_c__norank_p__Latescibacterota	g__norank_f__norank_o__norank_c__norank_p__Latescibacterota	s__unclassified_g__norank_f__norank_o__norank_c__norank_p__Latescibacterota	OTU3441	9	6	10	4	6	4	4	9	3	1	4	5	65
d__Bacteria	k__norank_d__Bacteria	p__Actinobacteriota	c__Actinobacteria	o__Micromonosporales	f__Micromonosporaceae	g__Longispora	s__uncultured_bacterium_g__Longispora	OTU1277	2	3	1	2	1	1	2	2	0	0	3	4	21
d__Bacteria	k__norank_d__Bacteria	p__Firmicutes	c__Bacilli	o__Bacillales	f__Salisediminibacteriaceae	g__Salipaludibacillus	s__unclassified_g__Salipaludibacillus	OTU1461	6	9	6	2	5	4	8	10	8	9	7	6	80
d__Bacteria	k__norank_d__Bacteria	p__Proteobacteria	c__Alphaproteobacteria	o__Azospirillales	f__Azospirillaceae	g__norank_f__Azospirillaceae	s__unclassified_g__norank_f__Azospirillaceae	OTU3325	0	0	0	0	0	2	1	0	1	2	0	1	7
d__Bacteria	k__norank_d__Bacteria	p__Planctomycetota	c__Planctomycetes	o__Planctomycetales	f__Rubinisphaeraceae	g__SH-PL14	s__uncultured_bacterium_g__SH-PL14	OTU2366	1	0	1	1	0	0	0	0	0	0	1	1	5
d__Bacteria	k__norank_d__Bacteria	p__Bdellovibrionota	c__Oligoflexia	o__0319-6G20	f__norank_o__0319-6G20	g__norank_f__norank_o__0319-6G20	s__unclassified_g__norank_f__norank_o__0319-6G20	OTU4443	0	0	0	0	0	0	1	0	1	0	0	0	2
d__Bacteria	k__norank_d__Bacteria	p__Proteobacteria	c__Alphaproteobacteria	o__Thalassobaculales	f__norank_o__Thalassobaculales	g__norank_f__norank_o__Thalassobaculales	s__unclassified_g__norank_f__norank_o__Thalassobaculales	OTU5213	3	1	0	0	0	1	0	0	0	2	3	3	13
d__Bacteria	k__norank_d__Bacteria	p__Chloroflexi	c__Chloroflexia	o__Chloroflexales	f__Chloroflexaceae	g__FFCH7168	s__uncultured_bacterium_g__FFCH7168	OTU324	0	1	0	0	0	0	0	0	0	0	1	0	2
d__Bacteria	k__norank_d__Bacteria	p__Acidobacteriota	c__Subgroup_22	o__norank_c__Subgroup_22	f__norank_o__norank_c__Subgroup_22	g__norank_f__norank_o__norank_c__Subgroup_22	s__uncultured_Acidobacterium_sp._g__norank_f__norank_o__norank_c__Subgroup_22	OTU2283	9	5	10	7	7	3	5	7	11	3	6	12	85
d__Bacteria	k__norank_d__Bacteria	p__Elusimicrobiota	c__Lineage_IIb	o__norank_c__Lineage_IIb	f__norank_o__norank_c__Lineage_IIb	g__norank_f__norank_o__norank_c__Lineage_IIb	s__uncultured_bacterium_g__norank_f__norank_o__norank_c__Lineage_IIb	OTU3977	0	0	0	0	0	0	1	1	0	0	0	1	3
d__Bacteria	k__norank_d__Bacteria	p__Chloroflexi	c__Anaerolineae	o__SBR1031	f__A4b	g__norank_f__A4b	s__uncultured_bacterium_g__norank_f__A4b	OTU2580	0	1	0	1	3	1	1	3	4	0	4	0	18
d__Bacteria	k__norank_d__Bacteria	p__Dependentiae	c__Babeliae	o__Babeliales	f__unclassified_o__Babeliales	g__unclassified_o__Babeliales	s__unclassified_o__Babeliales	OTU473	0	0	1	0	0	0	0	0	0	0	1	0	2
d__Bacteria	k__norank_d__Bacteria	p__Firmicutes	c__Clostridia	o__Lachnospirales	f__Lachnospiraceae	g__Mobilitalea	s__uncultured_bacterium_g__Mobilitalea	OTU1236	5	2	4	1	3	3	0	3	4	6	3	3	37
d__Bacteria	k__norank_d__Bacteria	p__NB1-j	c__norank_p__NB1-j	o__norank_c__norank_p__NB1-j	f__norank_o__norank_c__norank_p__NB1-j	g__norank_f__norank_o__norank_c__norank_p__NB1-j	s__uncultured_Desulfuromonadaceae_bacterium_g__norank	OTU4140	10	9	16	6	15	11	10	8	8	15	3	12	123
d__Bacteria	k__norank_d__Bacteria	p__Proteobacteria	c__Gammaproteobacteria	o__Pseudomonadales	f__Pseudomonadaceae	g__Pseudomonas	s__unclassified_g__Pseudomonas	OTU2896	62	48	56	44	60	56	91	86	83	106	103	81	876
d__Bacteria	k__norank_d__Bacteria	p__Planctomycetota	c__Planctomycetes	o__Gemmatales	f__Gemmataceae	g__norank_f__Gemmataceae	s__unclassified_g__norank_f__Gemmataceae	OTU2102	1	0	2	2	0	0	1	2	1	0	0	0	9
d__Bacteria	k__norank_d__Bacteria	p__unclassified_k__norank_d__Bacteria	c__unclassified_k__norank_d__Bacteria	o__unclassified_k__norank_d__Bacteria	f__unclassified_k__norank_d__Bacteria	g__unclassified_k__norank_d__Bacteria	s__unclassified_k__norank_d__Bacteria	OTU63	1	0	0	0	0	0	0	0	0	0	3	1	5
d__Bacteria	k__norank_d__Bacteria	p__Cyanobacteria	c__Vampirivibrionia	o__Vampirovibrionales	f__unclassified_o__Vampirovibrionales	g__unclassified_o__Vampirovibrionales	s__unclassified_o__Vampirovibrionales	OTU490	1	0	0	0	0	0	0	0	0	0	1	0	2
d__Bacteria	k__norank_d__Bacteria	p__Planctomycetota	c__OM190	o__norank_c__OM190	f__norank_o__norank_c__OM190	g__norank_f__norank_o__norank_c__OM190	s__uncultured_soil_bacterium_g__norank_f__norank_o__norank_c__OM190	OTU1400	1	0	1	0	0	0	0	1	0	0	1	2	6
d__Bacteria	k__norank_d__Bacteria	p__Chloroflexi	c__TK10	o__norank_c__TK10	f__norank_o__norank_c__TK10	g__norank_f__norank_o__norank_c__TK10	s__uncultured_bacterium_g__norank_f__norank_o__norank_c__TK10	OTU3828	29	34	48	32	25	43	54	41	35	40	32	40	453
d__Bacteria	k__norank_d__Bacteria	p__Chloroflexi	c__TK10	o__norank_c__TK10	f__norank_o__norank_c__TK10	g__norank_f__norank_o__norank_c__TK10	s__metagenome_g__norank_f__norank_o__norank_c__TK10	OTU2460	1	0	1	1	5	3	0	2	1	2	4	3	23
d__Bacteria	k__norank_d__Bacteria	p__Bdellovibrionota	c__Oligoflexia	o__0319-6G20	f__norank_o__0319-6G20	g__norank_f__norank_o__0319-6G20	s__unclassified_g__norank_f__norank_o__0319-6G20	OTU1354	6	4	3	3	1	5	4	2	3	2	5	2	40
d__Bacteria	k__norank_d__Bacteria	p__Planctomycetota	c__Planctomycetes	o__Pirellulales	f__Pirellulaceae	g__Pirellula	s__uncultured_Planctomycetaceae_bacterium_g__Pirellula	OTU2218	1	2	1	3	1	1	0	1	0	0	3	2	15
d__Bacteria	k__norank_d__Bacteria	p__Elusimicrobiota	c__Lineage_IIb	o__norank_c__Lineage_IIb	f__norank_o__norank_c__Lineage_IIb	g__norank_f__norank_o__norank_c__Lineage_IIb	s__uncultured_bacterium_g__norank_f__norank_o__norank_c__Lineage_IIb	OTU750	0	1	3	0	0	0	1	2	4	0	3	1	15
d__Bacteria	k__norank_d__Bacteria	p__Bacteroidota	c__Bacteroidia	o__Flavobacteriales	f__Flavobacteriaceae	g__Salinimicrobium	s__uncultured_Bacteroidetes_bacterium_g__Salinimicrobium	OTU2657	2	0	1	12	19	13	0	0	0	1	0	1	49
d__Bacteria	k__norank_d__Bacteria	p__Proteobacteria	c__Alphaproteobacteria	o__Rhizobiales	f__Devosiaceae	g__Devosia	s__unclassified_g__Devosia	OTU397	0	0	1	0	0	1	0	0	0	0	0	0	2
d__Bacteria	k__norank_d__Bacteria	p__Chloroflexi	c__N9D0	o__norank_c__N9D0	f__norank_o__norank_c__N9D0	g__norank_f__norank_o__norank_c__N9D0	s__uncultured_bacterium_g__norank_f__norank_o__norank_c__N9D0	OTU5249	0	0	0	0	0	0	0	0	0	2	0	0	2
d__Bacteria	k__norank_d__Bacteria	p__Gemmatimonadota	c__Gemmatimonadetes	o__Gemmatimonadales	f__Gemmatimonadaceae	g__norank_f__Gemmatimonadaceae	s__unclassified_g__norank_f__Gemmatimonadaceae	OTU5078	0	0	0	0	0	0	0	1	0	1	1	0	3
d__Bacteria	k__norank_d__Bacteria	p__Cyanobacteria	c__Cyanobacteriia	o__Cyanobacteriales	f__Nostocaceae	g__Tolypothrix	s__Nostoc_sp._NIES-4103	OTU4318	15	5	8	10	3	8	6	5	2	1	2	7	72
d__Bacteria	k__norank_d__Bacteria	p__Actinobacteriota	c__Actinobacteria	o__Micromonosporales	f__Micromonosporaceae	g__unclassified_f__Micromonosporaceae	s__unclassified_f__Micromonosporaceae	OTU1793	13	12	14	5	8	6	11	2	8	18	10	8	115
d__Bacteria	k__norank_d__Bacteria	p__Proteobacteria	c__Gammaproteobacteria	o__Xanthomonadales	f__Xanthomonadaceae	g__Pseudoxanthomonas	s__Pseudoxanthomonas_helianthi	OTU1051	3	8	11	3	5	4	1	2	2	1	0	0	40
d__Bacteria	k__norank_d__Bacteria	p__Proteobacteria	c__Alphaproteobacteria	o__Rhizobiales	f__Devosiaceae	g__Pelagibacterium	s__uncultured_bacterium_g__Pelagibacterium	OTU2579	0	0	0	1	3	4	0	0	0	1	0	2	11
d__Bacteria	k__norank_d__Bacteria	p__Proteobacteria	c__Alphaproteobacteria	o__unclassified_c__Alphaproteobacteria	f__unclassified_c__Alphaproteobacteria	g__unclassified_c__Alphaproteobacteria	s__unclassified_c__Alphaproteobacteria	OTU1472	0	0	2	0	0	1	1	1	0	0	0	0	5
d__Bacteria	k__norank_d__Bacteria	p__Firmicutes	c__Clostridia	o__norank_c__Clostridia	f__Gracilibacteraceae	g__Lutispora	s__unclassified_g__Lutispora	OTU2768	6	7	8	2	11	8	2	1	4	4	3	3	59
d__Bacteria	k__norank_d__Bacteria	p__Acidobacteriota	c__Vicinamibacteria	o__Vicinamibacterales	f__Vicinamibacteraceae	g__Luteitalea	s__unclassified_g__Luteitalea	OTU1092	1	1	2	1	0	0	1	0	1	1	1	1	10
d__Bacteria	k__norank_d__Bacteria	p__Acidobacteriota	c__Blastocatellia	o__Pyrinomonadales	f__Pyrinomonadaceae	g__RB41	s__uncultured_Acidobacteria_bacterium_g__RB41	OTU3285	0	0	0	0	0	0	2	0	0	0	0	1	3
d__Bacteria	k__norank_d__Bacteria	p__Acidobacteriota	c__Blastocatellia	o__11-24	f__norank_o__11-24	g__norank_f__norank_o__11-24	s__uncultured_Acidobacteria_bacterium_g__norank_f__norank_o__11-24	OTU3257	0	0	1	0	1	0	1	7	4	0	4	3	21
d__Bacteria	k__norank_d__Bacteria	p__Firmicutes	c__Limnochordia	o__Limnochordales	f__Limnochordaceae	g__norank_f__Limnochordaceae	s__uncultured_compost_bacterium_g__norank_f__Limnochordaceae	OTU3271	2	2	1	0	0	1	1	1	0	1	0	0	9
d__Bacteria	k__norank_d__Bacteria	p__Actinobacteriota	c__Actinobacteria	o__Micromonosporales	f__Micromonosporaceae	g__Micromonospora	s__Micromonospora_echinospora	OTU3056	25	40	38	24	65	53	51	43	38	58	47	26	508
d__Bacteria	k__norank_d__Bacteria	p__Myxococcota	c__Polyangia	o__Nannocystales	f__Nannocystaceae	g__Nannocystis	s__unclassified_g__Nannocystis	OTU3739	4	8	1	0	3	1	2	4	7	7	1	4	42
d__Bacteria	k__norank_d__Bacteria	p__Verrucomicrobiota	c__Verrucomicrobiae	o__Chthoniobacterales	f__Terrimicrobiaceae	g__FukuN18_freshwater_group	s__uncultured_bacterium_g__FukuN18_freshwater_group	OTU5255	0	0	0	0	1	0	0	0	0	0	0	0	1
d__Bacteria	k__norank_d__Bacteria	p__Chloroflexi	c__Chloroflexia	o__Chloroflexales	f__Roseiflexaceae	g__norank_f__Roseiflexaceae	s__uncultured_bacterium_g__norank_f__Roseiflexaceae	OTU661	0	1	2	1	1	1	1	0	1	0	0	2	10
d__Bacteria	k__norank_d__Bacteria	p__Verrucomicrobiota	c__Chlamydiae	o__Chlamydiales	f__unclassified_o__Chlamydiales	g__unclassified_o__Chlamydiales	s__unclassified_o__Chlamydiales	OTU1332	1	1	0	1	0	0	0	0	0	0	0	0	3
d__Bacteria	k__norank_d__Bacteria	p__Firmicutes	c__Desulfotomaculia	o__Desulfotomaculales	f__norank_o__Desulfotomaculales	g__Desulfurispora	s__unclassified_g__Desulfurispora	OTU2132	1	0	0	1	0	1	0	0	0	1	2	0	6
d__Bacteria	k__norank_d__Bacteria	p__Elusimicrobiota	c__Elusimicrobia	o__Lineage_IV	f__norank_o__Lineage_IV	g__norank_f__norank_o__Lineage_IV	s__unclassified_g__norank_f__norank_o__Lineage_IV	OTU854	1	0	1	2	0	0	1	0	1	0	1	0	7
d__Bacteria	k__norank_d__Bacteria	p__Firmicutes	c__Bacilli	o__Haloplasmatales	f__Haloplasmataceae	g__Haloplasma	s__uncultured_bacterium_g__Haloplasma	OTU2066	1	1	0	1	0	0	0	1	0	0	0	0	4
d__Bacteria	k__norank_d__Bacteria	p__Firmicutes	c__Clostridia	o__norank_c__Clostridia	f__Gracilibacteraceae	g__Gracilibacter	s__uncultured_bacterium_g__Gracilibacter	OTU4409	4	0	4	1	4	3	7	4	8	7	10	3	55
d__Bacteria	k__norank_d__Bacteria	p__Proteobacteria	c__Alphaproteobacteria	o__Micavibrionales	f__norank_o__Micavibrionales	g__norank_f__norank_o__Micavibrionales	s__unclassified_g__norank_f__norank_o__Micavibrionales	OTU5589	0	0	0	0	0	0	0	0	0	0	0	1	1
d__Bacteria	k__norank_d__Bacteria	p__Bacteroidota	c__Bacteroidia	o__Cytophagales	f__Hymenobacteraceae	g__Pontibacter	s__Pontibacter_populi	OTU2236	11	2	2	10	7	16	0	0	7	4	9	5	73
d__Bacteria	k__norank_d__Bacteria	p__Bacteroidota	c__Bacteroidia	o__Chitinophagales	f__Chitinophagaceae	g__Flavisolibacter	s__uncultured_Chitinophagaceae_bacterium_g__Flavisolibacter	OTU689	1	0	1	1	0	4	1	2	2	5	1	1	19
d__Bacteria	k__norank_d__Bacteria	p__Chloroflexi	c__unclassified_p__Chloroflexi	o__unclassified_p__Chloroflexi	f__unclassified_p__Chloroflexi	g__unclassified_p__Chloroflexi	s__unclassified_p__Chloroflexi	OTU2390	2	0	1	0	1	0	1	2	0	1	1	0	9
d__Bacteria	k__norank_d__Bacteria	p__Myxococcota	c__Polyangia	o__Polyangiales	f__Sandaracinaceae	g__norank_f__Sandaracinaceae	s__unclassified_g__norank_f__Sandaracinaceae	OTU510	0	4	0	2	3	2	0	1	1	1	1	3	18
d__Bacteria	k__norank_d__Bacteria	p__Proteobacteria	c__Alphaproteobacteria	o__Tistrellales	f__Geminicoccaceae	g__Geminicoccus	s__unclassified_g__Geminicoccus	OTU3677	2	4	3	5	10	6	1	6	4	4	5	5	55
d__Bacteria	k__norank_d__Bacteria	p__Proteobacteria	c__Gammaproteobacteria	o__Xanthomonadales	f__Rhodanobacteraceae	g__Luteibacter	s__unclassified_g__Luteibacter	OTU87	6	3	6	1	1	3	0	0	0	1	0	0	21
d__Bacteria	k__norank_d__Bacteria	p__Planctomycetota	c__Planctomycetes	o__Pirellulales	f__Pirellulaceae	g__Pir4_lineage	s__Planctomycetaceae_bacterium_LX124	OTU5268	4	2	3	6	4	0	0	0	2	4	4	3	32
d__Bacteria	k__norank_d__Bacteria	p__Firmicutes	c__Bacilli	o__Bacillales	f__Bacillaceae	g__unclassified_f__Bacillaceae	s__unclassified_f__Bacillaceae	OTU3931	0	0	0	2	0	0	3	0	2	1	1	1	10
d__Bacteria	k__norank_d__Bacteria	p__Proteobacteria	c__Gammaproteobacteria	o__Diplorickettsiales	f__Diplorickettsiaceae	g__norank_f__Diplorickettsiaceae	s__unclassified_g__norank_f__Diplorickettsiaceae	OTU99	1	0	0	0	0	0	0	0	0	0	0	0	1
d__Bacteria	k__norank_d__Bacteria	p__Proteobacteria	c__Gammaproteobacteria	o__Coxiellales	f__Coxiellaceae	g__Coxiella	s__uncultured_bacterium_g__Coxiella	OTU4987	0	0	0	0	0	1	0	1	0	1	0	1	4
d__Bacteria	k__norank_d__Bacteria	p__Firmicutes	c__Limnochordia	o__norank_c__Limnochordia	f__norank_o__norank_c__Limnochordia	g__Hydrogenispora	s__unclassified_g__Hydrogenispora	OTU4517	4	4	3	4	4	4	0	1	1	0	0	3	28
d__Bacteria	k__norank_d__Bacteria	p__Dependentiae	c__Babeliae	o__Babeliales	f__Vermiphilaceae	g__norank_f__Vermiphilaceae	s__unclassified_g__norank_f__Vermiphilaceae	OTU4058	0	0	1	0	0	1	2	1	1	1	0	4	11
d__Bacteria	k__norank_d__Bacteria	p__Gemmatimonadota	c__Gemmatimonadetes	o__Gemmatimonadales	f__Gemmatimonadaceae	g__norank_f__Gemmatimonadaceae	s__uncultured_Alphaproteobacteria_bacterium_g__norank_f__Gemmatimonadaceae	OTU1013	2	3	2	0	1	1	0	0	1	0	1	1	12
d__Bacteria	k__norank_d__Bacteria	p__Bacteroidota	c__Bacteroidia	o__Chitinophagales	f__Saprospiraceae	g__Phaeodactylibacter	s__uncultured_bacterium_g__Phaeodactylibacter	OTU2314	1	1	0	1	0	0	2	2	0	0	0	1	8
d__Bacteria	k__norank_d__Bacteria	p__Elusimicrobiota	c__Lineage_IIa	o__norank_c__Lineage_IIa	f__norank_o__norank_c__Lineage_IIa	g__norank_f__norank_o__norank_c__Lineage_IIa	s__uncultured_actinobacterium_g__norank_f__norank	OTU1150	0	1	2	1	0	1	0	0	0	0	0	0	5
d__Bacteria	k__norank_d__Bacteria	p__Planctomycetota	c__Pla4_lineage	o__norank_c__Pla4_lineage	f__norank_o__norank_c__Pla4_lineage	g__norank_f__norank_o__norank_c__Pla4_lineage	s__unclassified_g__norank_f__norank_o__norank_c__Pla4_lineage	OTU1511	1	3	2	0	1	1	0	1	0	1	1	1	12
d__Bacteria	k__norank_d__Bacteria	p__Proteobacteria	c__Gammaproteobacteria	o__Burkholderiales	f__Nitrosomonadaceae	g__Nitrosomonas	s__unclassified_g__Nitrosomonas	OTU1535	3	3	5	2	2	5	0	3	1	3	2	5	34
d__Bacteria	k__norank_d__Bacteria	p__Actinobacteriota	c__Acidimicrobiia	o__Microtrichales	f__norank_o__Microtrichales	g__norank_f__norank_o__Microtrichales	s__metagenome_g__norank_f__norank_o__Microtrichales	OTU1971	4	3	5	5	3	3	4	3	6	5	3	3	47
d__Bacteria	k__norank_d__Bacteria	p__Patescibacteria	c__Saccharimonadia	o__Saccharimonadales	f__norank_o__Saccharimonadales	g__norank_f__norank_o__Saccharimonadales	s__unclassified_g__norank_f__norank_o__Saccharimonadales	OTU4706	1	1	1	4	0	3	0	1	1	0	0	0	12
d__Bacteria	k__norank_d__Bacteria	p__Bdellovibrionota	c__Oligoflexia	o__0319-6G20	f__norank_o__0319-6G20	g__norank_f__norank_o__0319-6G20	s__unclassified_g__norank_f__norank_o__0319-6G20	OTU830	1	0	1	0	3	2	0	3	0	0	2	0	12
d__Bacteria	k__norank_d__Bacteria	p__Myxococcota	c__Polyangia	o__Polyangiales	f__Sandaracinaceae	g__norank_f__Sandaracinaceae	s__unclassified_g__norank_f__Sandaracinaceae	OTU1853	0	2	0	0	0	1	0	1	1	0	1	0	6
d__Bacteria	k__norank_d__Bacteria	p__Sumerlaeota	c__Sumerlaeia	o__Sumerlaeales	f__Sumerlaeaceae	g__Sumerlaea	s__unclassified_g__Sumerlaea	OTU2812	0	0	0	0	1	0	0	0	0	0	0	0	1
d__Bacteria	k__norank_d__Bacteria	p__Firmicutes	c__Limnochordia	o__M55-D21	f__norank_o__M55-D21	g__norank_f__norank_o__M55-D21	s__unclassified_g__norank_f__norank_o__M55-D21	OTU1898	0	0	0	0	0	0	0	0	0	1	0	0	1
d__Bacteria	k__norank_d__Bacteria	p__Proteobacteria	c__Gammaproteobacteria	o__Acidiferrobacterales	f__Acidiferrobacteraceae	g__Sulfurifustis	s__uncultured_bacterium_g__Sulfurifustis	OTU1544	0	0	1	0	0	0	0	0	0	0	0	0	1
d__Bacteria	k__norank_d__Bacteria	p__Firmicutes	c__Negativicutes	o__Veillonellales-Selenomonadales	f__norank_o__Veillonellales-Selenomonadales	g__norank_f__norank_o__Veillonellales-Selenomonadales	s__unclassified_g__norank_f__norank_o__Veillonellales-Selenomonadales	OTU1464	2	0	2	1	0	1	0	0	0	0	0	0	6
d__Bacteria	k__norank_d__Bacteria	p__Actinobacteriota	c__Acidimicrobiia	o__Actinomarinales	f__norank_o__Actinomarinales	g__norank_f__norank_o__Actinomarinales	s__unclassified_g__norank_f__norank_o__Actinomarinales	OTU5557	0	0	0	0	0	0	0	0	0	0	0	2	2
d__Bacteria	k__norank_d__Bacteria	p__Bacteroidota	c__Bacteroidia	o__Flavobacteriales	f__Flavobacteriaceae	g__Flavobacterium	s__unclassified_g__Flavobacterium	OTU4144	2	3	2	3	0	0	2	4	1	3	2	0	22
d__Bacteria	k__norank_d__Bacteria	p__Proteobacteria	c__Alphaproteobacteria	o__Rhodospirillales	f__norank_o__Rhodospirillales	g__norank_f__norank_o__Rhodospirillales	s__unclassified_g__norank_f__norank_o__Rhodospirillales	OTU5391	0	0	0	0	0	0	0	0	0	0	1	1	2
d__Bacteria	k__norank_d__Bacteria	p__Myxococcota	c__Myxococcia	o__Myxococcales	f__Myxococcaceae	g__P3OB-42	s__unclassified_g__P3OB-42	OTU2162	0	0	0	1	0	0	0	0	0	0	0	0	1
d__Bacteria	k__norank_d__Bacteria	p__MBNT15	c__norank_p__MBNT15	o__norank_c__norank_p__MBNT15	f__norank_o__norank_c__norank_p__MBNT15	g__norank_f__norank_o__norank_c__norank_p__MBNT15	s__unclassified_g__norank_f__norank_o__norank_c__norank_p__MBNT15	OTU1527	18	31	16	13	37	26	25	25	24	16	16	20	267
d__Bacteria	k__norank_d__Bacteria	p__Actinobacteriota	c__Actinobacteria	o__Pseudonocardiales	f__Pseudonocardiaceae	g__Pseudonocardia	s__unclassified_g__Pseudonocardia	OTU4735	9	12	6	10	13	4	7	10	6	10	7	7	101
d__Bacteria	k__norank_d__Bacteria	p__unclassified_k__norank_d__Bacteria	c__unclassified_k__norank_d__Bacteria	o__unclassified_k__norank_d__Bacteria	f__unclassified_k__norank_d__Bacteria	g__unclassified_k__norank_d__Bacteria	s__unclassified_k__norank_d__Bacteria	OTU3374	2	1	0	3	0	1	1	3	1	0	0	0	12
d__Bacteria	k__norank_d__Bacteria	p__Myxococcota	c__Polyangia	o__Polyangiales	f__BIrii41	g__norank_f__BIrii41	s__uncultured_bacterium_g__norank_f__BIrii41	OTU1733	11	5	3	3	2	4	0	4	0	7	4	3	46
d__Bacteria	k__norank_d__Bacteria	p__Firmicutes	c__Symbiobacteriia	o__Symbiobacteriales	f__Symbiobacteraceae	g__norank_f__Symbiobacteraceae	s__unclassified_g__norank_f__Symbiobacteraceae	OTU4551	0	0	1	0	0	0	0	2	1	0	2	3	9
d__Bacteria	k__norank_d__Bacteria	p__Bacteroidota	c__Bacteroidia	o__Flavobacteriales	f__Crocinitomicaceae	g__Fluviicola	s__unclassified_g__Fluviicola	OTU3641	0	1	1	0	0	0	1	1	0	0	0	0	4
d__Bacteria	k__norank_d__Bacteria	p__Actinobacteriota	c__Thermoleophilia	o__Gaiellales	f__norank_o__Gaiellales	g__norank_f__norank_o__Gaiellales	s__uncultured_bacterium_g__norank_f__norank_o__Gaiellales	OTU1424	7	5	7	7	4	6	8	3	12	5	3	5	72
d__Bacteria	k__norank_d__Bacteria	p__Proteobacteria	c__Alphaproteobacteria	o__unclassified_c__Alphaproteobacteria	f__unclassified_c__Alphaproteobacteria	g__unclassified_c__Alphaproteobacteria	s__unclassified_c__Alphaproteobacteria	OTU4978	2	2	1	1	3	0	0	1	2	1	0	0	13
d__Bacteria	k__norank_d__Bacteria	p__Verrucomicrobiota	c__Verrucomicrobiae	o__Verrucomicrobiales	f__DEV007	g__norank_f__DEV007	s__uncultured_bacterium_g__norank_f__DEV007	OTU3558	0	0	1	1	2	0	2	2	2	0	3	1	14
d__Bacteria	k__norank_d__Bacteria	p__Patescibacteria	c__Saccharimonadia	o__Saccharimonadales	f__norank_o__Saccharimonadales	g__norank_f__norank_o__Saccharimonadales	s__unclassified_g__norank_f__norank_o__Saccharimonadales	OTU5070	1	0	0	0	1	0	0	0	1	1	1	1	6
d__Bacteria	k__norank_d__Bacteria	p__Firmicutes	c__Bacilli	o__Thermoactinomycetales	f__Thermoactinomycetaceae	g__norank_f__Thermoactinomycetaceae	s__Thermoactinomycetaceae_bacterium	OTU4951	0	3	0	0	0	1	4	0	0	1	0	2	11
d__Bacteria	k__norank_d__Bacteria	p__Verrucomicrobiota	c__Verrucomicrobiae	o__Verrucomicrobiales	f__Verrucomicrobiaceae	g__Roseimicrobium	s__metagenome_g__Roseimicrobium	OTU2217	0	3	0	4	5	0	0	3	2	0	1	2	20
d__Bacteria	k__norank_d__Bacteria	p__Gemmatimonadota	c__Gemmatimonadetes	o__Gemmatimonadales	f__Gemmatimonadaceae	g__Gemmatimonas	s__uncultured_Gemmatimonas_sp._g__Gemmatimonas	OTU4514	3	0	2	5	1	7	5	3	3	3	2	2	36
d__Bacteria	k__norank_d__Bacteria	p__Proteobacteria	c__Alphaproteobacteria	o__unclassified_c__Alphaproteobacteria	f__unclassified_c__Alphaproteobacteria	g__unclassified_c__Alphaproteobacteria	s__unclassified_c__Alphaproteobacteria	OTU5087	0	1	0	0	1	0	1	0	0	2	0	0	5
d__Bacteria	k__norank_d__Bacteria	p__Patescibacteria	c__Saccharimonadia	o__Saccharimonadales	f__unclassified_o__Saccharimonadales	g__unclassified_o__Saccharimonadales	s__unclassified_o__Saccharimonadales	OTU231	1	3	5	2	1	1	0	0	1	0	0	2	16
d__Bacteria	k__norank_d__Bacteria	p__Dependentiae	c__Babeliae	o__Babeliales	f__Vermiphilaceae	g__norank_f__Vermiphilaceae	s__uncultured_bacterium_g__norank_f__Vermiphilaceae	OTU575	0	1	0	0	0	0	0	1	1	1	1	0	5
d__Bacteria	k__norank_d__Bacteria	p__Planctomycetota	c__Planctomycetes	o__Gemmatales	f__Gemmataceae	g__norank_f__Gemmataceae	s__unclassified_g__norank_f__Gemmataceae	OTU1817	1	1	2	0	2	2	0	0	0	0	1	1	10
d__Bacteria	k__norank_d__Bacteria	p__Chloroflexi	c__Chloroflexia	o__Chloroflexales	f__Roseiflexaceae	g__norank_f__Roseiflexaceae	s__uncultured_soil_bacterium_g__norank_f__Roseiflexaceae	OTU3740	1	2	1	0	0	3	1	1	2	2	0	0	13
d__Bacteria	k__norank_d__Bacteria	p__Bacteroidota	c__Bacteroidia	o__Chitinophagales	f__37-13	g__norank_f__37-13	s__uncultured_bacterium_g__norank_f__37-13	OTU2060	2	0	0	1	1	1	3	1	0	2	0	2	13
d__Bacteria	k__norank_d__Bacteria	p__unclassified_k__norank_d__Bacteria	c__unclassified_k__norank_d__Bacteria	o__unclassified_k__norank_d__Bacteria	f__unclassified_k__norank_d__Bacteria	g__unclassified_k__norank_d__Bacteria	s__unclassified_k__norank_d__Bacteria	OTU834	1	0	1	0	0	0	1	0	0	0	0	0	3
d__Bacteria	k__norank_d__Bacteria	p__unclassified_k__norank_d__Bacteria	c__unclassified_k__norank_d__Bacteria	o__unclassified_k__norank_d__Bacteria	f__unclassified_k__norank_d__Bacteria	g__unclassified_k__norank_d__Bacteria	s__unclassified_k__norank_d__Bacteria	OTU835	19	29	17	9	24	16	15	20	28	17	10	12	216
d__Bacteria	k__norank_d__Bacteria	p__Acidobacteriota	c__Thermoanaerobaculia	o__Thermoanaerobaculales	f__Thermoanaerobaculaceae	g__Subgroup_10	s__unclassified_g__Subgroup_10	OTU3793	1	2	0	2	3	2	1	3	2	8	2	4	30
d__Bacteria	k__norank_d__Bacteria	p__Firmicutes	c__Bacilli	o__Paenibacillales	f__Paenibacillaceae	g__Paenibacillus	s__uncultured_Firmicutes_bacterium_g__Paenibacillus	OTU5397	7	3	5	12	5	7	8	3	7	6	5	10	78
d__Bacteria	k__norank_d__Bacteria	p__Chloroflexi	c__Chloroflexia	o__Thermomicrobiales	f__AKYG1722	g__norank_f__AKYG1722	s__uncultured_bacterium_g__norank_f__AKYG1722	OTU1549	71	55	51	63	69	63	63	41	70	71	58	62	737
d__Bacteria	k__norank_d__Bacteria	p__Proteobacteria	c__Gammaproteobacteria	o__Acidiferrobacterales	f__Acidiferrobacteraceae	g__Sulfurifustis	s__uncultured_bacterium_g__Sulfurifustis	OTU2814	1	0	0	1	2	1	2	1	3	2	0	1	14
d__Bacteria	k__norank_d__Bacteria	p__Cyanobacteria	c__Sericytochromatia	o__norank_c__Sericytochromatia	f__norank_o__norank_c__Sericytochromatia	g__norank_f__norank_o__norank_c__Sericytochromatia	s__CyanobacteriaMelainabacteria_group_bacterium_S15B-MN24_CBMW_12	OTU1299	1	1	0	3	1	0	0	2	2	0	0	3	13
d__Bacteria	k__norank_d__Bacteria	p__Verrucomicrobiota	c__Verrucomicrobiae	o__Pedosphaerales	f__Pedosphaeraceae	g__norank_f__Pedosphaeraceae	s__metagenome_g__norank_f__Pedosphaeraceae	OTU3618	22	19	20	16	13	10	16	35	19	9	28	27	234
d__Bacteria	k__norank_d__Bacteria	p__Planctomycetota	c__Planctomycetes	o__Planctomycetales	f__norank_o__Planctomycetales	g__norank_f__norank_o__Planctomycetales	s__unclassified_g__norank_f__norank_o__Planctomycetales	OTU2348	2	1	3	1	3	2	0	3	1	3	3	0	22
d__Bacteria	k__norank_d__Bacteria	p__Proteobacteria	c__Gammaproteobacteria	o__Gammaproteobacteria_Incertae_Sedis	f__unclassified_o__Gammaproteobacteria_Incertae_Sedis	g__Candidatus_Ovatusbacter	s__uncultured_bacterium_g__Candidatus_Ovatusbacter	OTU3042	0	1	1	0	2	0	0	4	0	3	2	0	13
d__Bacteria	k__norank_d__Bacteria	p__Myxococcota	c__Polyangia	o__Haliangiales	f__Haliangiaceae	g__Haliangium	s__unclassified_g__Haliangium	OTU790	0	0	2	2	5	3	1	1	1	4	4	3	26
d__Bacteria	k__norank_d__Bacteria	p__Chloroflexi	c__Chloroflexia	o__Chloroflexales	f__Herpetosiphonaceae	g__Herpetosiphon	s__uncultured_Chloroflexi_bacterium_g__Herpetosiphon	OTU2419	1	1	1	0	1	1	1	0	4	1	1	1	13
d__Bacteria	k__norank_d__Bacteria	p__Planctomycetota	c__Planctomycetes	o__Gemmatales	f__Gemmataceae	g__norank_f__Gemmataceae	s__unclassified_g__norank_f__Gemmataceae	OTU4433	0	1	0	0	0	1	1	1	0	0	0	0	4
d__Bacteria	k__norank_d__Bacteria	p__Firmicutes	c__Bacilli	o__Thermoactinomycetales	f__Thermoactinomycetaceae	g__Baia	s__Geothermomicrobium_sp.	OTU34	4	3	2	1	1	3	7	0	5	6	2	4	38
d__Bacteria	k__norank_d__Bacteria	p__Firmicutes	c__Bacilli	o__unclassified_c__Bacilli	f__unclassified_c__Bacilli	g__unclassified_c__Bacilli	s__unclassified_c__Bacilli	OTU427	0	1	0	0	1	0	0	1	0	0	0	2	5
d__Bacteria	k__norank_d__Bacteria	p__Verrucomicrobiota	c__Verrucomicrobiae	o__Chthoniobacterales	f__Chthoniobacteraceae	g__Chthoniobacter	s__uncultured_bacterium_g__Chthoniobacter	OTU3954	2	3	0	3	1	0	2	6	5	2	2	1	27
d__Bacteria	k__norank_d__Bacteria	p__Proteobacteria	c__Gammaproteobacteria	o__Acidiferrobacterales	f__Acidiferrobacteraceae	g__Sulfurifustis	s__unclassified_g__Sulfurifustis	OTU3997	0	1	2	1	0	0	3	0	3	1	1	1	13
d__Bacteria	k__norank_d__Bacteria	p__Actinobacteriota	c__Actinobacteria	o__Micromonosporales	f__Micromonosporaceae	g__unclassified_f__Micromonosporaceae	s__unclassified_f__Micromonosporaceae	OTU3053	0	1	4	3	8	3	2	0	1	5	14	3	44
d__Bacteria	k__norank_d__Bacteria	p__Planctomycetota	c__Planctomycetes	o__Gemmatales	f__Gemmataceae	g__norank_f__Gemmataceae	s__uncultured_bacterium_g__norank_f__Gemmataceae	OTU4322	1	2	3	3	3	0	4	2	3	1	0	2	24
d__Bacteria	k__norank_d__Bacteria	p__Proteobacteria	c__Gammaproteobacteria	o__Diplorickettsiales	f__Diplorickettsiaceae	g__Aquicella	s__unclassified_g__Aquicella	OTU1628	1	4	4	2	7	2	7	4	6	7	7	6	57
d__Bacteria	k__norank_d__Bacteria	p__Firmicutes	c__Clostridia	o__Caldicoprobacterales	f__Caldicoprobacteraceae	g__Caldicoprobacter	s__uncultured_bacterium_g__Caldicoprobacter	OTU4394	1	3	5	0	2	3	2	2	4	5	1	2	30
d__Bacteria	k__norank_d__Bacteria	p__Armatimonadota	c__norank_p__Armatimonadota	o__norank_c__norank_p__Armatimonadota	f__norank_o__norank_c__norank_p__Armatimonadota	g__norank_f__norank_o__norank_c__norank_p__Armatimonadota	s__metagenome_g__norank_f__norank_o__norank_c__norank_p__Armatimonadota	OTU5409	1	0	0	0	0	0	0	1	0	0	2	1	5
d__Bacteria	k__norank_d__Bacteria	p__Planctomycetota	c__Planctomycetes	o__Pirellulales	f__Pirellulaceae	g__norank_f__Pirellulaceae	s__unclassified_g__norank_f__Pirellulaceae	OTU2495	3	0	1	2	2	1	4	3	1	1	1	2	21
d__Bacteria	k__norank_d__Bacteria	p__Planctomycetota	c__Phycisphaerae	o__Phycisphaerales	f__Phycisphaeraceae	g__SM1A02	s__uncultured_Planctomycetales_bacterium_g__SM1A02	OTU871	0	0	1	1	0	0	0	0	0	0	1	1	4
d__Bacteria	k__norank_d__Bacteria	p__Myxococcota	c__Polyangia	o__Haliangiales	f__Haliangiaceae	g__Haliangium	s__uncultured_prokaryote_g__Haliangium	OTU3902	2	2	5	3	3	6	3	4	3	6	3	6	46
d__Bacteria	k__norank_d__Bacteria	p__Chloroflexi	c__Anaerolineae	o__Caldilineales	f__Caldilineaceae	g__norank_f__Caldilineaceae	s__uncultured_bacterium_g__norank_f__Caldilineaceae	OTU3985	7	8	9	4	14	5	4	7	2	2	6	6	74
d__Bacteria	k__norank_d__Bacteria	p__Chloroflexi	c__Anaerolineae	o__Ardenticatenales	f__Ardenticatenaceae	g__norank_f__Ardenticatenaceae	s__uncultured_Chloroflexus_sp._g__norank_f__Ardenticatenaceae	OTU192	3	1	2	0	1	2	0	0	2	2	0	0	13
d__Bacteria	k__norank_d__Bacteria	p__Proteobacteria	c__Alphaproteobacteria	o__Tistrellales	f__Geminicoccaceae	g__Candidatus_Alysiosphaera	s__uncultured_Alphaproteobacteria_bacterium_g__Candidatus_Alysiosphaera	OTU5009	0	0	0	0	0	1	0	2	0	1	1	1	6
d__Bacteria	k__norank_d__Bacteria	p__Actinobacteriota	c__Acidimicrobiia	o__IMCC26256	f__norank_o__IMCC26256	g__norank_f__norank_o__IMCC26256	s__unclassified_g__norank_f__norank_o__IMCC26256	OTU4763	13	10	16	11	14	25	9	11	12	19	11	13	164
d__Bacteria	k__norank_d__Bacteria	p__Proteobacteria	c__Gammaproteobacteria	o__Burkholderiales	f__Nitrosomonadaceae	g__IS-44	s__uncultured_bacterium_g__IS-44	OTU3645	0	0	0	0	1	0	1	1	5	1	0	0	9
d__Bacteria	k__norank_d__Bacteria	p__Planctomycetota	c__Planctomycetes	o__Gemmatales	f__Gemmataceae	g__norank_f__Gemmataceae	s__uncultured_planctomycete_g__norank_f__Gemmataceae	OTU4343	3	3	9	5	6	2	3	3	8	3	3	2	50
d__Bacteria	k__norank_d__Bacteria	p__Myxococcota	c__bacteriap25	o__norank_c__bacteriap25	f__norank_o__norank_c__bacteriap25	g__norank_f__norank_o__norank_c__bacteriap25	s__uncultured_soil_bacterium_g__norank_f__norank_o__norank_c__bacteriap25	OTU4521	0	0	0	0	0	0	0	1	1	0	1	1	4
d__Bacteria	k__norank_d__Bacteria	p__Acidobacteriota	c__Vicinamibacteria	o__Vicinamibacterales	f__norank_o__Vicinamibacterales	g__norank_f__norank_o__Vicinamibacterales	s__unclassified_g__norank_f__norank_o__Vicinamibacterales	OTU4934	2	0	1	1	0	0	0	6	1	1	0	0	12
d__Bacteria	k__norank_d__Bacteria	p__Myxococcota	c__Polyangia	o__Haliangiales	f__Haliangiaceae	g__Haliangium	s__unclassified_g__Haliangium	OTU2152	0	6	4	4	4	0	1	3	10	8	7	5	52
d__Bacteria	k__norank_d__Bacteria	p__Chloroflexi	c__Chloroflexia	o__Chloroflexales	f__Herpetosiphonaceae	g__Herpetosiphon	s__uncultured_bacterium_g__Herpetosiphon	OTU4453	0	1	1	0	1	0	1	0	1	0	0	0	5
d__Bacteria	k__norank_d__Bacteria	p__Acidobacteriota	c__Vicinamibacteria	o__Vicinamibacterales	f__norank_o__Vicinamibacterales	g__norank_f__norank_o__Vicinamibacterales	s__unclassified_g__norank_f__norank_o__Vicinamibacterales	OTU4930	75	46	80	76	57	40	69	112	95	19	88	52	809
d__Bacteria	k__norank_d__Bacteria	p__Firmicutes	c__Clostridia	o__Clostridiales	f__Clostridiaceae	g__Clostridium_sensu_stricto_13	s__unclassified_g__Clostridium_sensu_stricto_13	OTU4447	2	0	0	1	2	2	3	1	1	0	1	0	13
d__Bacteria	k__norank_d__Bacteria	p__Proteobacteria	c__Gammaproteobacteria	o__Gammaproteobacteria_Incertae_Sedis	f__unclassified_o__Gammaproteobacteria_Incertae_Sedis	g__norank_f__unclassified	s__uncultured_bacterium_g__norank_f__unclassified	OTU4982	2	3	4	2	2	5	2	0	3	3	3	1	30
d__Bacteria	k__norank_d__Bacteria	p__Gemmatimonadota	c__S0134_terrestrial_group	o__norank_c__S0134_terrestrial_group	f__norank_o__norank_c__S0134_terrestrial_group	g__norank_f__norank_o__norank_c__S0134_terrestrial_group	s__uncultured_bacterium_g__norank_f__norank_o__norank_c__S0134_terrestrial_group	OTU2196	0	2	0	2	0	2	0	1	0	0	0	0	7
d__Bacteria	k__norank_d__Bacteria	p__Proteobacteria	c__Alphaproteobacteria	o__unclassified_c__Alphaproteobacteria	f__unclassified_c__Alphaproteobacteria	g__unclassified_c__Alphaproteobacteria	s__unclassified_c__Alphaproteobacteria	OTU3484	0	1	0	0	0	0	1	0	1	0	1	2	6
d__Bacteria	k__norank_d__Bacteria	p__Patescibacteria	c__Saccharimonadia	o__Saccharimonadales	f__norank_o__Saccharimonadales	g__norank_f__norank_o__Saccharimonadales	s__unclassified_g__norank_f__norank_o__Saccharimonadales	OTU5356	0	0	1	0	0	1	3	2	0	0	7	0	14
d__Bacteria	k__norank_d__Bacteria	p__Planctomycetota	c__OM190	o__norank_c__OM190	f__norank_o__norank_c__OM190	g__norank_f__norank_o__norank_c__OM190	s__unclassified_g__norank_f__norank_o__norank_c__OM190	OTU116	0	2	0	0	0	0	0	0	0	0	0	0	2
d__Bacteria	k__norank_d__Bacteria	p__Proteobacteria	c__Gammaproteobacteria	o__Methylococcales	f__Methylococcaceae	g__norank_f__Methylococcaceae	s__unclassified_g__norank_f__Methylococcaceae	OTU892	0	0	1	2	1	0	0	0	0	0	0	0	4
d__Bacteria	k__norank_d__Bacteria	p__Acidobacteriota	c__Blastocatellia	o__DS-100	f__norank_o__DS-100	g__norank_f__norank_o__DS-100	s__uncultured_Acidobacteriales_bacterium_g__norank_f__norank	OTU5377	1	0	0	0	1	0	0	0	0	0	2	0	4
d__Bacteria	k__norank_d__Bacteria	p__Myxococcota	c__Polyangia	o__Haliangiales	f__Haliangiaceae	g__Haliangium	s__unclassified_g__Haliangium	OTU1776	4	4	2	1	0	3	1	0	3	3	2	2	25
d__Bacteria	k__norank_d__Bacteria	p__Firmicutes	c__Bacilli	o__Paenibacillales	f__Paenibacillaceae	g__Cohnella	s__unclassified_g__Cohnella	OTU3184	1	1	3	5	1	1	1	3	0	1	1	1	19
d__Bacteria	k__norank_d__Bacteria	p__Bacteroidota	c__Bacteroidia	o__Chitinophagales	f__37-13	g__norank_f__37-13	s__uncultured_Sphingobacteriales_bacterium_g__norank_f__37-13	OTU1291	0	1	1	0	1	1	0	0	0	0	0	0	4
d__Bacteria	k__norank_d__Bacteria	p__Myxococcota	c__bacteriap25	o__norank_c__bacteriap25	f__norank_o__norank_c__bacteriap25	g__norank_f__norank_o__norank_c__bacteriap25	s__uncultured_Myxococcales_bacterium_g__norank_f__norank_o__norank	OTU5487	3	8	8	6	10	6	13	4	6	8	12	16	100
d__Bacteria	k__norank_d__Bacteria	p__Verrucomicrobiota	c__Verrucomicrobiae	o__Opitutales	f__Opitutaceae	g__IMCC26134	s__metagenome_g__IMCC26134	OTU4041	0	0	0	0	0	0	2	0	0	1	0	0	3
d__Bacteria	k__norank_d__Bacteria	p__Bacteroidota	c__Bacteroidia	o__unclassified_c__Bacteroidia	f__unclassified_c__Bacteroidia	g__unclassified_c__Bacteroidia	s__unclassified_c__Bacteroidia	OTU5252	0	0	0	0	0	0	0	0	0	2	0	2	4
d__Bacteria	k__norank_d__Bacteria	p__Patescibacteria	c__Saccharimonadia	o__Saccharimonadales	f__unclassified_o__Saccharimonadales	g__unclassified_o__Saccharimonadales	s__unclassified_o__Saccharimonadales	OTU5261	1	0	0	1	2	0	2	0	0	1	0	1	8
d__Bacteria	k__norank_d__Bacteria	p__Proteobacteria	c__Gammaproteobacteria	o__Diplorickettsiales	f__Diplorickettsiaceae	g__norank_f__Diplorickettsiaceae	s__metagenome_g__norank_f__Diplorickettsiaceae	OTU3758	1	2	0	1	0	1	3	0	1	0	1	1	11
d__Bacteria	k__norank_d__Bacteria	p__Dependentiae	c__Babeliae	o__Babeliales	f__Vermiphilaceae	g__norank_f__Vermiphilaceae	s__uncultured_bacterium_g__norank_f__Vermiphilaceae	OTU2281	1	0	0	1	1	0	0	0	1	0	0	0	4
d__Bacteria	k__norank_d__Bacteria	p__Actinobacteriota	c__Actinobacteria	o__Frankiales	f__unclassified_o__Frankiales	g__unclassified_o__Frankiales	s__unclassified_o__Frankiales	OTU4441	0	0	0	1	0	1	1	0	0	1	0	0	4
d__Bacteria	k__norank_d__Bacteria	p__Myxococcota	c__Myxococcia	o__Myxococcales	f__Myxococcaceae	g__P3OB-42	s__uncultured_bacterium_g__P3OB-42	OTU5158	1	1	0	0	0	0	0	0	0	1	1	0	4
d__Bacteria	k__norank_d__Bacteria	p__Myxococcota	c__Polyangia	o__Haliangiales	f__Haliangiaceae	g__Haliangium	s__uncultured_bacterium_g__Haliangium	OTU415	0	0	0	1	1	0	1	0	1	0	2	0	6
d__Bacteria	k__norank_d__Bacteria	p__Actinobacteriota	c__Actinobacteria	o__Corynebacteriales	f__Mycobacteriaceae	g__Mycobacterium	s__Mycobacterium_sp._g__Mycobacterium	OTU4944	17	24	14	18	11	24	12	7	5	22	10	8	172
d__Bacteria	k__norank_d__Bacteria	p__Planctomycetota	c__Planctomycetes	o__Planctomycetales	f__Gimesiaceae	g__norank_f__Gimesiaceae	s__unclassified_g__norank_f__Gimesiaceae	OTU1928	7	11	4	4	7	4	3	6	6	4	1	2	59
d__Bacteria	k__norank_d__Bacteria	p__Gemmatimonadota	c__S0134_terrestrial_group	o__norank_c__S0134_terrestrial_group	f__norank_o__norank_c__S0134_terrestrial_group	g__norank_f__norank_o__norank_c__S0134_terrestrial_group	s__uncultured_bacterium_g__norank_f__norank_o__norank_c__S0134_terrestrial_group	OTU5413	3	1	1	2	6	3	2	1	2	6	2	1	30
d__Bacteria	k__norank_d__Bacteria	p__Proteobacteria	c__Alphaproteobacteria	o__Rhodospirillales	f__norank_o__Rhodospirillales	g__norank_f__norank_o__Rhodospirillales	s__metagenome_g__norank_f__norank_o__Rhodospirillales	OTU4654	0	0	0	0	0	0	0	2	0	0	0	0	2
d__Bacteria	k__norank_d__Bacteria	p__Proteobacteria	c__Gammaproteobacteria	o__WD260	f__norank_o__WD260	g__norank_f__norank_o__WD260	s__uncultured_bacterium_g__norank_f__norank_o__WD260	OTU3443	0	0	0	0	1	1	5	1	4	0	0	0	12
d__Bacteria	k__norank_d__Bacteria	p__Myxococcota	c__unclassified_p__Myxococcota	o__unclassified_p__Myxococcota	f__unclassified_p__Myxococcota	g__unclassified_p__Myxococcota	s__unclassified_p__Myxococcota	OTU4886	0	0	0	0	0	0	0	0	2	0	0	0	2
d__Bacteria	k__norank_d__Bacteria	p__Gemmatimonadota	c__Longimicrobia	o__Longimicrobiales	f__Longimicrobiaceae	g__norank_f__Longimicrobiaceae	s__unclassified_g__norank_f__Longimicrobiaceae	OTU77	2	0	0	1	1	8	2	1	2	1	0	3	21
d__Bacteria	k__norank_d__Bacteria	p__Bdellovibrionota	c__Bdellovibrionia	o__Bdellovibrionales	f__Bdellovibrionaceae	g__OM27_clade	s__unclassified_g__OM27_clade	OTU4791	0	0	0	0	0	0	0	3	1	0	1	1	6
d__Bacteria	k__norank_d__Bacteria	p__Bdellovibrionota	c__Bdellovibrionia	o__Bdellovibrionales	f__Bdellovibrionaceae	g__OM27_clade	s__uncultured_microorganism_g__OM27_clade	OTU1463	0	5	5	2	2	2	4	4	5	3	1	4	37
d__Bacteria	k__norank_d__Bacteria	p__Proteobacteria	c__Gammaproteobacteria	o__Gammaproteobacteria_Incertae_Sedis	f__unclassified_o__Gammaproteobacteria_Incertae_Sedis	g__Candidatus_Berkiella	s__uncultured_bacterium_g__Candidatus_Berkiella	OTU2694	0	0	0	0	0	0	1	0	0	0	0	0	1
d__Bacteria	k__norank_d__Bacteria	p__Proteobacteria	c__Alphaproteobacteria	o__Rhodospirillales	f__Rhodospirillaceae	g__norank_f__Rhodospirillaceae	s__metagenome_g__norank_f__Rhodospirillaceae	OTU3368	0	2	1	2	0	1	2	0	2	1	1	2	14
d__Bacteria	k__norank_d__Bacteria	p__Proteobacteria	c__Gammaproteobacteria	o__Cellvibrionales	f__Cellvibrionaceae	g__norank_f__Cellvibrionaceae	s__unclassified_g__norank_f__Cellvibrionaceae	OTU558	1	1	0	1	2	2	0	0	1	0	0	1	9
d__Bacteria	k__norank_d__Bacteria	p__Actinobacteriota	c__Acidimicrobiia	o__Microtrichales	f__Ilumatobacteraceae	g__norank_f__Ilumatobacteraceae	s__unclassified_g__norank_f__Ilumatobacteraceae	OTU210	29	22	31	32	17	22	25	25	27	47	18	29	324
d__Bacteria	k__norank_d__Bacteria	p__Planctomycetota	c__Planctomycetes	o__Pirellulales	f__Pirellulaceae	g__Pir4_lineage	s__Planctomycetes_bacterium_g__Pir4_lineage	OTU4641	0	0	0	0	0	0	0	2	0	0	0	0	2
d__Bacteria	k__norank_d__Bacteria	p__Gemmatimonadota	c__Longimicrobia	o__Longimicrobiales	f__Longimicrobiaceae	g__YC-ZSS-LKJ147	s__unclassified_g__YC-ZSS-LKJ147	OTU4680	1	0	2	4	1	1	3	4	2	0	0	0	18
d__Bacteria	k__norank_d__Bacteria	p__Planctomycetota	c__Phycisphaerae	o__Phycisphaerales	f__Phycisphaeraceae	g__Phycisphaera	s__uncultured_bacterium_g__Phycisphaera	OTU1534	0	1	1	0	0	0	1	0	0	0	0	0	3
d__Bacteria	k__norank_d__Bacteria	p__Planctomycetota	c__Phycisphaerae	o__Phycisphaerales	f__Phycisphaeraceae	g__SM1A02	s__unclassified_g__SM1A02	OTU5175	1	1	0	1	1	0	0	0	0	2	3	1	10
d__Bacteria	k__norank_d__Bacteria	p__Bdellovibrionota	c__Oligoflexia	o__0319-6G20	f__norank_o__0319-6G20	g__norank_f__norank_o__0319-6G20	s__uncultured_bacterium_g__norank_f__norank_o__0319-6G20	OTU3867	1	1	2	0	0	1	1	0	0	0	0	0	6
d__Bacteria	k__norank_d__Bacteria	p__Actinobacteriota	c__Thermoleophilia	o__Gaiellales	f__norank_o__Gaiellales	g__norank_f__norank_o__Gaiellales	s__unclassified_g__norank_f__norank_o__Gaiellales	OTU4399	4	0	3	0	3	3	2	2	11	1	1	1	31
d__Bacteria	k__norank_d__Bacteria	p__Chloroflexi	c__Chloroflexia	o__Chloroflexales	f__Chloroflexaceae	g__FFCH7168	s__uncultured_bacterium_g__FFCH7168	OTU2170	2	1	0	1	0	1	1	3	0	1	2	0	12
d__Bacteria	k__norank_d__Bacteria	p__Firmicutes	c__Desulfitobacteriia	o__Desulfitobacteriales	f__Desulfitobacteriaceae	g__Desulfosporosinus	s__uncultured_bacterium_g__Desulfosporosinus	OTU2514	3	1	0	0	1	0	2	2	1	0	0	0	10
d__Bacteria	k__norank_d__Bacteria	p__Bacteroidota	c__Kapabacteria	o__Kapabacteriales	f__norank_o__Kapabacteriales	g__norank_f__norank_o__Kapabacteriales	s__unclassified_g__norank_f__norank_o__Kapabacteriales	OTU300	0	1	0	0	1	0	1	0	1	0	0	0	4
d__Bacteria	k__norank_d__Bacteria	p__Actinobacteriota	c__Actinobacteria	o__Propionibacteriales	f__Nocardioidaceae	g__Nocardioides	s__unclassified_g__Nocardioides	OTU4328	6	11	9	14	9	19	24	12	21	17	19	17	178
d__Bacteria	k__norank_d__Bacteria	p__Dependentiae	c__Babeliae	o__Babeliales	f__unclassified_o__Babeliales	g__unclassified_o__Babeliales	s__unclassified_o__Babeliales	OTU499	0	1	0	0	0	0	0	0	0	0	1	0	2
d__Bacteria	k__norank_d__Bacteria	p__Chloroflexi	c__TK10	o__norank_c__TK10	f__norank_o__norank_c__TK10	g__norank_f__norank_o__norank_c__TK10	s__uncultured_Chloroflexus_sp._g__norank_f__norank_o__norank	OTU1271	10	11	16	8	12	23	3	14	13	24	23	11	168
d__Bacteria	k__norank_d__Bacteria	p__Bacteroidota	c__Bacteroidia	o__Chitinophagales	f__Chitinophagaceae	g__norank_f__Chitinophagaceae	s__unclassified_g__norank_f__Chitinophagaceae	OTU1647	43	52	54	40	37	42	67	35	58	39	42	41	550
d__Bacteria	k__norank_d__Bacteria	p__Planctomycetota	c__Planctomycetes	o__Gemmatales	f__Gemmataceae	g__norank_f__Gemmataceae	s__unclassified_g__norank_f__Gemmataceae	OTU2124	0	0	1	1	0	1	0	1	0	0	0	0	4
d__Bacteria	k__norank_d__Bacteria	p__Firmicutes	c__Moorellia	o__Desulfitibacterales	f__Desulfitibacteraceae	g__Desulfitibacter	s__uncultured_bacterium_g__Desulfitibacter	OTU2974	2	0	0	0	3	0	1	1	0	1	1	0	9
d__Bacteria	k__norank_d__Bacteria	p__Chloroflexi	c__JG30-KF-CM66	o__norank_c__JG30-KF-CM66	f__norank_o__norank_c__JG30-KF-CM66	g__norank_f__norank_o__norank_c__JG30-KF-CM66	s__unclassified_g__norank_f__norank_o__norank_c__JG30-KF-CM66	OTU2901	7	6	16	8	10	13	13	10	5	5	2	8	103
d__Bacteria	k__norank_d__Bacteria	p__Actinobacteriota	c__Thermoleophilia	o__Gaiellales	f__norank_o__Gaiellales	g__norank_f__norank_o__Gaiellales	s__unclassified_g__norank_f__norank_o__Gaiellales	OTU5432	0	0	1	0	0	0	4	1	2	2	3	1	14
d__Bacteria	k__norank_d__Bacteria	p__Planctomycetota	c__Phycisphaerae	o__Tepidisphaerales	f__WD2101_soil_group	g__norank_f__WD2101_soil_group	s__uncultured_planctomycete_g__norank_f__WD2101_soil_group	OTU208	4	2	1	6	5	1	4	1	5	3	2	6	40
d__Bacteria	k__norank_d__Bacteria	p__Chloroflexi	c__Anaerolineae	o__SBR1031	f__A4b	g__norank_f__A4b	s__uncultured_bacterium_g__norank_f__A4b	OTU2943	1	2	2	1	3	3	0	8	2	1	9	2	34
d__Bacteria	k__norank_d__Bacteria	p__Bacteroidota	c__Bacteroidia	o__Flavobacteriales	f__Flavobacteriaceae	g__Flavobacterium	s__metagenome_g__Flavobacterium	OTU5486	13	21	24	25	20	27	29	15	22	28	19	24	267
d__Bacteria	k__norank_d__Bacteria	p__Dadabacteria	c__Dadabacteriia	o__Dadabacteriales	f__norank_o__Dadabacteriales	g__norank_f__norank_o__Dadabacteriales	s__unclassified_g__norank_f__norank_o__Dadabacteriales	OTU3275	1	1	1	0	1	0	2	0	1	2	3	0	12
d__Bacteria	k__norank_d__Bacteria	p__Firmicutes	c__Bacilli	o__Alicyclobacillales	f__Alicyclobacillaceae	g__Tumebacillus	s__unclassified_g__Tumebacillus	OTU1176	53	61	41	39	47	40	61	42	54	83	72	59	652
d__Bacteria	k__norank_d__Bacteria	p__Chloroflexi	c__Anaerolineae	o__Ardenticatenales	f__norank_o__Ardenticatenales	g__norank_f__norank_o__Ardenticatenales	s__unclassified_g__norank_f__norank_o__Ardenticatenales	OTU4284	13	7	5	7	9	10	7	17	12	21	10	13	131
d__Bacteria	k__norank_d__Bacteria	p__Proteobacteria	c__Gammaproteobacteria	o__KI89A_clade	f__norank_o__KI89A_clade	g__norank_f__norank_o__KI89A_clade	s__unclassified_g__norank_f__norank_o__KI89A_clade	OTU4045	2	2	3	2	0	0	3	8	2	2	0	5	29
d__Bacteria	k__norank_d__Bacteria	p__Actinobacteriota	c__Actinobacteria	o__Streptomycetales	f__Streptomycetaceae	g__Streptomyces	s__Streptomyces_scabiei	OTU4110	92	64	81	81	111	92	86	73	84	89	88	79	1020
d__Bacteria	k__norank_d__Bacteria	p__Firmicutes	c__Clostridia	o__Caldicoprobacterales	f__Caldicoprobacteraceae	g__Caldicoprobacter	s__unclassified_g__Caldicoprobacter	OTU816	0	2	2	2	3	2	5	3	1	6	4	6	36
d__Bacteria	k__norank_d__Bacteria	p__Proteobacteria	c__Alphaproteobacteria	o__Caulobacterales	f__Hyphomonadaceae	g__SWB02	s__uncultured_bacterium_g__SWB02	OTU1449	47	48	26	24	63	44	40	42	43	64	50	44	535
d__Bacteria	k__norank_d__Bacteria	p__Cyanobacteria	c__Vampirivibrionia	o__Vampirovibrionales	f__Vampirovibrionaceae	g__Vampirovibrio	s__uncultured_delta_proteobacterium_g__Vampirovibrio	OTU975	0	0	1	0	1	2	0	1	0	0	2	1	8
d__Bacteria	k__norank_d__Bacteria	p__Firmicutes	c__Bacilli	o__Paenibacillales	f__Paenibacillaceae	g__Paenibacillus	s__Paenibacillus_barengoltzii	OTU2026	1	2	1	4	4	4	3	0	4	3	6	3	35
d__Bacteria	k__norank_d__Bacteria	p__Proteobacteria	c__Gammaproteobacteria	o__Pseudomonadales	f__Pseudomonadaceae	g__Pseudomonas	s__unclassified_g__Pseudomonas	OTU2113	0	1	0	2	1	5	4	0	2	2	2	1	20
d__Bacteria	k__norank_d__Bacteria	p__Acidobacteriota	c__Acidobacteriae	o__Acidobacteriales	f__Acidobacteriaceae_Subgroup_1	g__Granulicella	s__unclassified_g__Granulicella	OTU3763	0	0	0	0	0	0	3	0	0	0	0	0	3
d__Bacteria	k__norank_d__Bacteria	p__Planctomycetota	c__Phycisphaerae	o__Tepidisphaerales	f__WD2101_soil_group	g__norank_f__WD2101_soil_group	s__uncultured_bacterium_g__norank_f__WD2101_soil_group	OTU2093	1	0	1	1	0	0	0	0	0	0	0	0	3
d__Bacteria	k__norank_d__Bacteria	p__Firmicutes	c__Limnochordia	o__Limnochordales	f__Limnochordaceae	g__norank_f__Limnochordaceae	s__uncultured_compost_bacterium_g__norank_f__Limnochordaceae	OTU2874	14	13	7	14	8	7	6	1	8	1	5	3	87
d__Bacteria	k__norank_d__Bacteria	p__Verrucomicrobiota	c__Verrucomicrobiae	o__Pedosphaerales	f__Pedosphaeraceae	g__norank_f__Pedosphaeraceae	s__uncultured_bacterium_g__norank_f__Pedosphaeraceae	OTU5016	0	0	0	0	2	0	0	1	3	1	1	0	8
d__Bacteria	k__norank_d__Bacteria	p__unclassified_k__norank_d__Bacteria	c__unclassified_k__norank_d__Bacteria	o__unclassified_k__norank_d__Bacteria	f__unclassified_k__norank_d__Bacteria	g__unclassified_k__norank_d__Bacteria	s__unclassified_k__norank_d__Bacteria	OTU3606	0	1	0	2	1	2	2	1	1	0	0	0	10
d__Bacteria	k__norank_d__Bacteria	p__unclassified_k__norank_d__Bacteria	c__unclassified_k__norank_d__Bacteria	o__unclassified_k__norank_d__Bacteria	f__unclassified_k__norank_d__Bacteria	g__unclassified_k__norank_d__Bacteria	s__unclassified_k__norank_d__Bacteria	OTU3350	4	4	2	1	2	4	1	1	0	3	5	6	33
d__Bacteria	k__norank_d__Bacteria	p__Myxococcota	c__Polyangia	o__mle1-27	f__norank_o__mle1-27	g__norank_f__norank_o__mle1-27	s__unclassified_g__norank_f__norank_o__mle1-27	OTU360	1	1	0	0	0	1	0	2	1	0	1	1	8
d__Bacteria	k__norank_d__Bacteria	p__Gemmatimonadota	c__Gemmatimonadetes	o__Gemmatimonadales	f__Gemmatimonadaceae	g__norank_f__Gemmatimonadaceae	s__unclassified_g__norank_f__Gemmatimonadaceae	OTU2586	2	1	1	0	3	2	0	1	1	0	0	0	11
d__Bacteria	k__norank_d__Bacteria	p__Myxococcota	c__Polyangia	o__Polyangiales	f__Phaselicystidaceae	g__Phaselicystis	s__uncultured_bacterium_g__Phaselicystis	OTU1163	1	2	1	1	3	1	1	0	0	0	0	0	10
d__Bacteria	k__norank_d__Bacteria	p__Planctomycetota	c__Phycisphaerae	o__Phycisphaerales	f__Phycisphaeraceae	g__SM1A02	s__unclassified_g__SM1A02	OTU3003	1	0	0	1	1	1	1	0	0	0	0	0	5
d__Bacteria	k__norank_d__Bacteria	p__Patescibacteria	c__Saccharimonadia	o__Saccharimonadales	f__unclassified_o__Saccharimonadales	g__unclassified_o__Saccharimonadales	s__unclassified_o__Saccharimonadales	OTU72	1	0	0	0	0	1	0	0	0	0	0	0	2
d__Bacteria	k__norank_d__Bacteria	p__Proteobacteria	c__Gammaproteobacteria	o__Diplorickettsiales	f__Diplorickettsiaceae	g__Aquicella	s__unclassified_g__Aquicella	OTU4117	6	3	3	1	2	3	2	0	1	2	1	1	25
d__Bacteria	k__norank_d__Bacteria	p__Acidobacteriota	c__Acidobacteriae	o__unclassified_c__Acidobacteriae	f__unclassified_c__Acidobacteriae	g__unclassified_c__Acidobacteriae	s__unclassified_c__Acidobacteriae	OTU3822	1	1	1	1	1	2	2	0	0	1	1	3	14
d__Bacteria	k__norank_d__Bacteria	p__SAR324_cladeMarine_group_B	c__norank_p__SAR324_cladeMarine_group_B	o__norank_c__norank_p__SAR324_cladeMarine_group_B	f__norank_o__norank_c__norank_p__SAR324_cladeMarine_group_B	g__norank_f__norank_o__norank_c__norank_p__SAR324_cladeMarine_group_B	s__unclassified_g__norank_f__norank_o__norank_c__norank_p__SAR324_cladeMarine_group_B	OTU2276	0	0	1	1	0	0	0	0	0	0	0	0	2
d__Bacteria	k__norank_d__Bacteria	p__Chloroflexi	c__Anaerolineae	o__Anaerolineales	f__Anaerolineaceae	g__norank_f__Anaerolineaceae	s__unclassified_g__norank_f__Anaerolineaceae	OTU3539	6	6	7	7	6	4	11	11	4	2	8	9	81
d__Bacteria	k__norank_d__Bacteria	p__Firmicutes	c__Bacilli	o__unclassified_c__Bacilli	f__unclassified_c__Bacilli	g__unclassified_c__Bacilli	s__unclassified_c__Bacilli	OTU3305	0	0	0	0	0	2	1	0	1	2	2	0	8
d__Bacteria	k__norank_d__Bacteria	p__Gemmatimonadota	c__Gemmatimonadetes	o__Gemmatimonadales	f__Gemmatimonadaceae	g__norank_f__Gemmatimonadaceae	s__uncultured_Gemmatimonadetes_bacterium_g__norank_f__Gemmatimonadaceae	OTU1555	16	28	18	15	20	22	14	11	20	30	18	19	231
d__Bacteria	k__norank_d__Bacteria	p__Firmicutes	c__Syntrophomonadia	o__Syntrophomonadales	f__Syntrophomonadaceae	g__Syntrophomonas	s__unclassified_g__Syntrophomonas	OTU3372	2	1	1	0	1	0	1	1	1	2	0	0	10
d__Bacteria	k__norank_d__Bacteria	p__Planctomycetota	c__Planctomycetes	o__Pirellulales	f__Pirellulaceae	g__Rhodopirellula	s__uncultured_planctomycete_g__Rhodopirellula	OTU5058	1	2	1	1	0	1	0	1	0	1	2	1	11
d__Bacteria	k__norank_d__Bacteria	p__Actinobacteriota	c__Actinobacteria	o__0319-7L14	f__norank_o__0319-7L14	g__norank_f__norank_o__0319-7L14	s__uncultured_bacterium_g__norank_f__norank_o__0319-7L14	OTU4901	1	0	0	1	1	0	0	0	2	0	0	0	5
d__Bacteria	k__norank_d__Bacteria	p__Gemmatimonadota	c__Gemmatimonadetes	o__Gemmatimonadales	f__Gemmatimonadaceae	g__norank_f__Gemmatimonadaceae	s__uncultured_bacterium_g__norank_f__Gemmatimonadaceae	OTU2542	3	2	3	1	1	0	1	2	4	2	0	6	25
d__Bacteria	k__norank_d__Bacteria	p__Myxococcota	c__Polyangia	o__Haliangiales	f__Haliangiaceae	g__Haliangium	s__uncultured_Nannocystineae_bacterium_g__Haliangium	OTU3736	1	1	0	0	1	0	3	1	1	0	1	0	9
d__Bacteria	k__norank_d__Bacteria	p__Bdellovibrionota	c__Bdellovibrionia	o__Bdellovibrionales	f__Bdellovibrionaceae	g__Bdellovibrio	s__unclassified_g__Bdellovibrio	OTU2588	1	1	0	0	1	0	0	0	0	0	1	0	4
d__Bacteria	k__norank_d__Bacteria	p__Actinobacteriota	c__Actinobacteria	o__Propionibacteriales	f__Nocardioidaceae	g__Nocardioides	s__unclassified_g__Nocardioides	OTU5186	35	33	42	58	39	40	53	32	29	48	39	29	477
d__Bacteria	k__norank_d__Bacteria	p__Actinobacteriota	c__Acidimicrobiia	o__Microtrichales	f__unclassified_o__Microtrichales	g__unclassified_o__Microtrichales	s__unclassified_o__Microtrichales	OTU5464	1	1	0	1	1	0	1	0	1	0	0	1	7
d__Bacteria	k__norank_d__Bacteria	p__Gemmatimonadota	c__Gemmatimonadetes	o__Gemmatimonadales	f__Gemmatimonadaceae	g__unclassified_f__Gemmatimonadaceae	s__unclassified_f__Gemmatimonadaceae	OTU240	3	1	2	0	0	1	0	3	2	0	0	2	14
d__Bacteria	k__norank_d__Bacteria	p__Proteobacteria	c__Gammaproteobacteria	o__Diplorickettsiales	f__Diplorickettsiaceae	g__Aquicella	s__unclassified_g__Aquicella	OTU2213	0	0	0	4	0	1	0	0	0	0	2	0	7
d__Bacteria	k__norank_d__Bacteria	p__Proteobacteria	c__Alphaproteobacteria	o__Puniceispirillales	f__Puniceispirillales_Incertae_Sedis	g__Constrictibacter	s__uncultured_bacterium_g__Constrictibacter	OTU2249	1	0	0	1	0	2	0	0	0	1	0	0	5
d__Bacteria	k__norank_d__Bacteria	p__Proteobacteria	c__Gammaproteobacteria	o__Burkholderiales	f__Nitrosomonadaceae	g__MND1	s__unclassified_g__MND1	OTU1054	15	13	12	16	10	19	25	14	15	19	18	17	193
d__Bacteria	k__norank_d__Bacteria	p__Firmicutes	c__Clostridia	o__Clostridiales	f__Clostridiaceae	g__Clostridium_sensu_stricto_10	s__uncultured_bacterium_g__Clostridium_sensu_stricto_10	OTU2000	0	0	1	1	0	1	1	1	2	2	1	3	13
d__Bacteria	k__norank_d__Bacteria	p__Proteobacteria	c__Gammaproteobacteria	o__unclassified_c__Gammaproteobacteria	f__unclassified_c__Gammaproteobacteria	g__unclassified_c__Gammaproteobacteria	s__unclassified_c__Gammaproteobacteria	OTU2474	0	2	0	0	1	0	0	0	0	0	0	1	4
d__Bacteria	k__norank_d__Bacteria	p__Chloroflexi	c__Chloroflexia	o__Chloroflexales	f__Roseiflexaceae	g__norank_f__Roseiflexaceae	s__uncultured_bacterium_g__norank_f__Roseiflexaceae	OTU1015	14	17	16	20	24	22	9	13	8	8	12	12	175
d__Bacteria	k__norank_d__Bacteria	p__Cyanobacteria	c__Sericytochromatia	o__norank_c__Sericytochromatia	f__norank_o__norank_c__Sericytochromatia	g__norank_f__norank_o__norank_c__Sericytochromatia	s__unclassified_g__norank_f__norank_o__norank_c__Sericytochromatia	OTU3424	1	2	1	0	3	5	4	3	1	1	4	2	27
d__Bacteria	k__norank_d__Bacteria	p__Planctomycetota	c__OM190	o__norank_c__OM190	f__norank_o__norank_c__OM190	g__norank_f__norank_o__norank_c__OM190	s__uncultured_Planctomyces_sp._g__norank	OTU1412	5	8	10	8	5	8	6	8	7	2	1	1	69
d__Bacteria	k__norank_d__Bacteria	p__Acidobacteriota	c__Subgroup_22	o__norank_c__Subgroup_22	f__norank_o__norank_c__Subgroup_22	g__norank_f__norank_o__norank_c__Subgroup_22	s__unclassified_g__norank_f__norank_o__norank_c__Subgroup_22	OTU3281	0	0	0	0	0	0	1	0	2	0	0	0	3
d__Bacteria	k__norank_d__Bacteria	p__Chloroflexi	c__Dehalococcoidia	o__SAR202_clade	f__norank_o__SAR202_clade	g__norank_f__norank_o__SAR202_clade	s__unclassified_g__norank_f__norank_o__SAR202_clade	OTU3632	5	8	13	8	3	9	13	9	5	10	8	6	97
d__Bacteria	k__norank_d__Bacteria	p__Proteobacteria	c__Alphaproteobacteria	o__norank_c__Alphaproteobacteria	f__norank_o__norank_c__Alphaproteobacteria	g__norank_f__norank_o__norank_c__Alphaproteobacteria	s__uncultured_bacterium_g__norank_f__norank_o__norank_c__Alphaproteobacteria	OTU1735	1	4	1	2	6	3	2	5	4	0	0	1	29
d__Bacteria	k__norank_d__Bacteria	p__Bdellovibrionota	c__Oligoflexia	o__Oligoflexales	f__norank_o__Oligoflexales	g__Oligoflexus	s__uncultured_bacterium_g__Oligoflexus	OTU4959	0	0	0	0	0	0	0	0	3	1	0	1	5
d__Bacteria	k__norank_d__Bacteria	p__Proteobacteria	c__Gammaproteobacteria	o__Oceanospirillales	f__Halomonadaceae	g__Halomonas	s__unclassified_g__Halomonas	OTU3646	2	1	2	3	5	7	1	3	0	19	6	11	60
d__Bacteria	k__norank_d__Bacteria	p__Myxococcota	c__Polyangia	o__Polyangiales	f__Polyangiaceae	g__Pajaroellobacter	s__metagenome_g__Pajaroellobacter	OTU2461	0	0	0	2	2	1	0	0	3	1	2	0	11
d__Bacteria	k__norank_d__Bacteria	p__Actinobacteriota	c__Actinobacteria	o__Micrococcales	f__Microbacteriaceae	g__unclassified_f__Microbacteriaceae	s__unclassified_f__Microbacteriaceae	OTU270	6	4	0	3	3	3	1	1	1	2	4	0	28
d__Bacteria	k__norank_d__Bacteria	p__Gemmatimonadota	c__Gemmatimonadetes	o__Gemmatimonadales	f__Gemmatimonadaceae	g__norank_f__Gemmatimonadaceae	s__unclassified_g__norank_f__Gemmatimonadaceae	OTU4536	176	176	209	185	177	241	217	207	223	263	181	203	2458
d__Bacteria	k__norank_d__Bacteria	p__Patescibacteria	c__Saccharimonadia	o__Saccharimonadales	f__LWQ8	g__norank_f__LWQ8	s__uncultured_bacterium_g__norank_f__LWQ8	OTU3162	0	0	0	0	0	11	0	0	0	0	0	0	11
d__Bacteria	k__norank_d__Bacteria	p__Proteobacteria	c__Alphaproteobacteria	o__Azospirillales	f__Azospirillaceae	g__Skermanella	s__unclassified_g__Skermanella	OTU3081	1	0	0	0	1	0	0	0	0	1	0	0	3
d__Bacteria	k__norank_d__Bacteria	p__Actinobacteriota	c__Acidimicrobiia	o__Microtrichales	f__Iamiaceae	g__Iamia	s__uncultured_bacterium_g__Iamia	OTU92	16	9	13	21	13	14	9	11	13	13	9	8	149
d__Bacteria	k__norank_d__Bacteria	p__Dependentiae	c__Babeliae	o__Babeliales	f__Vermiphilaceae	g__norank_f__Vermiphilaceae	s__uncultured_bacterium_g__norank_f__Vermiphilaceae	OTU377	0	0	1	0	0	0	1	0	1	0	2	0	5
d__Bacteria	k__norank_d__Bacteria	p__Proteobacteria	c__Gammaproteobacteria	o__Diplorickettsiales	f__Diplorickettsiaceae	g__norank_f__Diplorickettsiaceae	s__unclassified_g__norank_f__Diplorickettsiaceae	OTU4844	0	0	0	0	0	0	0	1	0	0	0	0	1
d__Bacteria	k__norank_d__Bacteria	p__Latescibacterota	c__norank_p__Latescibacterota	o__norank_c__norank_p__Latescibacterota	f__norank_o__norank_c__norank_p__Latescibacterota	g__norank_f__norank_o__norank_c__norank_p__Latescibacterota	s__unclassified_g__norank_f__norank_o__norank_c__norank_p__Latescibacterota	OTU1315	1	1	1	0	0	1	0	1	1	0	0	1	7
d__Bacteria	k__norank_d__Bacteria	p__SAR324_cladeMarine_group_B	c__norank_p__SAR324_cladeMarine_group_B	o__norank_c__norank_p__SAR324_cladeMarine_group_B	f__norank_o__norank_c__norank_p__SAR324_cladeMarine_group_B	g__norank_f__norank_o__norank_c__norank_p__SAR324_cladeMarine_group_B	s__uncultured_soil_bacterium_g__norank_f__norank_o__norank_c__norank_p__SAR324_cladeMarine_group_B	OTU3125	0	0	0	0	0	1	0	0	1	0	0	0	2
d__Bacteria	k__norank_d__Bacteria	p__Chloroflexi	c__unclassified_p__Chloroflexi	o__unclassified_p__Chloroflexi	f__unclassified_p__Chloroflexi	g__unclassified_p__Chloroflexi	s__unclassified_p__Chloroflexi	OTU1475	0	0	1	0	1	0	0	0	1	0	0	0	3
d__Bacteria	k__norank_d__Bacteria	p__Gemmatimonadota	c__BD2-11_terrestrial_group	o__norank_c__BD2-11_terrestrial_group	f__norank_o__norank_c__BD2-11_terrestrial_group	g__norank_f__norank_o__norank_c__BD2-11_terrestrial_group	s__metagenome_g__norank_f__norank_o__norank_c__BD2-11_terrestrial_group	OTU3430	10	10	18	19	9	4	29	21	20	15	18	17	190
d__Bacteria	k__norank_d__Bacteria	p__Acidobacteriota	c__Acidobacteriae	o__unclassified_c__Acidobacteriae	f__unclassified_c__Acidobacteriae	g__unclassified_c__Acidobacteriae	s__unclassified_c__Acidobacteriae	OTU5228	0	2	1	0	0	0	0	0	2	2	0	0	7
d__Bacteria	k__norank_d__Bacteria	p__Planctomycetota	c__Planctomycetes	o__Gemmatales	f__Gemmataceae	g__norank_f__Gemmataceae	s__unclassified_g__norank_f__Gemmataceae	OTU2603	0	0	0	0	2	0	0	1	1	0	1	0	5
d__Bacteria	k__norank_d__Bacteria	p__Chloroflexi	c__Dehalococcoidia	o__S085	f__norank_o__S085	g__norank_f__norank_o__S085	s__uncultured_bacterium_g__norank_f__norank_o__S085	OTU839	15	22	30	15	12	17	15	15	15	5	8	2	171
d__Bacteria	k__norank_d__Bacteria	p__Planctomycetota	c__Planctomycetes	o__Gemmatales	f__Gemmataceae	g__norank_f__Gemmataceae	s__uncultured_bacterium_g__norank_f__Gemmataceae	OTU3785	0	0	0	0	0	0	1	0	1	0	0	0	2
d__Bacteria	k__norank_d__Bacteria	p__Chloroflexi	c__TK10	o__norank_c__TK10	f__norank_o__norank_c__TK10	g__norank_f__norank_o__norank_c__TK10	s__uncultured_bacterium_g__norank_f__norank_o__norank_c__TK10	OTU3776	1	3	3	5	6	4	1	4	6	4	3	9	49
d__Bacteria	k__norank_d__Bacteria	p__unclassified_k__norank_d__Bacteria	c__unclassified_k__norank_d__Bacteria	o__unclassified_k__norank_d__Bacteria	f__unclassified_k__norank_d__Bacteria	g__unclassified_k__norank_d__Bacteria	s__unclassified_k__norank_d__Bacteria	OTU5514	1	1	1	0	1	1	0	2	3	1	2	3	16
d__Bacteria	k__norank_d__Bacteria	p__Actinobacteriota	c__Acidimicrobiia	o__Microtrichales	f__Ilumatobacteraceae	g__unclassified_f__Ilumatobacteraceae	s__unclassified_f__Ilumatobacteraceae	OTU3792	2	2	1	3	2	2	5	1	4	2	1	1	26
d__Bacteria	k__norank_d__Bacteria	p__Proteobacteria	c__Gammaproteobacteria	o__unclassified_c__Gammaproteobacteria	f__unclassified_c__Gammaproteobacteria	g__unclassified_c__Gammaproteobacteria	s__unclassified_c__Gammaproteobacteria	OTU3666	2	1	1	2	0	2	4	0	2	0	1	2	17
d__Bacteria	k__norank_d__Bacteria	p__Firmicutes	c__Bacilli	o__Paenibacillales	f__Paenibacillaceae	g__Paenibacillus	s__unclassified_g__Paenibacillus	OTU596	5	4	2	6	3	7	2	5	3	12	6	4	59
d__Bacteria	k__norank_d__Bacteria	p__Bacteroidota	c__Bacteroidia	o__Sphingobacteriales	f__AKYH767	g__norank_f__AKYH767	s__metagenome_g__norank_f__AKYH767	OTU1900	0	1	1	0	1	3	3	1	1	1	1	4	17
d__Bacteria	k__norank_d__Bacteria	p__Firmicutes	c__Bacilli	o__Paenibacillales	f__Paenibacillaceae	g__Paenibacillus	s__unclassified_g__Paenibacillus	OTU593	1	4	5	2	6	7	4	2	5	2	5	1	44
d__Bacteria	k__norank_d__Bacteria	p__Bacteroidota	c__Bacteroidia	o__Cytophagales	f__Cytophagaceae	g__Sporocytophaga	s__uncultured_Cytophaga_sp._g__Sporocytophaga	OTU2376	0	0	0	0	0	0	0	1	0	0	2	0	3
d__Bacteria	k__norank_d__Bacteria	p__Dependentiae	c__Babeliae	o__Babeliales	f__UBA12409	g__norank_f__UBA12409	s__uncultured_organism_g__norank_f__UBA12409	OTU5556	0	1	0	0	0	0	0	0	0	0	0	1	2
d__Bacteria	k__norank_d__Bacteria	p__Dependentiae	c__Babeliae	o__Babeliales	f__Vermiphilaceae	g__norank_f__Vermiphilaceae	s__uncultured_bacterium_g__norank_f__Vermiphilaceae	OTU513	0	1	0	0	0	1	1	0	0	0	0	0	3
d__Bacteria	k__norank_d__Bacteria	p__Chloroflexi	c__Dehalococcoidia	o__SAR202_clade	f__norank_o__SAR202_clade	g__norank_f__norank_o__SAR202_clade	s__unclassified_g__norank_f__norank_o__SAR202_clade	OTU4727	0	0	1	1	0	0	0	0	0	0	1	0	3
d__Bacteria	k__norank_d__Bacteria	p__Firmicutes	c__Clostridia	o__Peptostreptococcales-Tissierellales	f__norank_o__Peptostreptococcales-Tissierellales	g__Tissierella	s__Tissierella_praeacuta	OTU5420	1	0	1	0	1	1	1	1	0	3	2	0	11
d__Bacteria	k__norank_d__Bacteria	p__Actinobacteriota	c__Thermoleophilia	o__Solirubrobacterales	f__67-14	g__norank_f__67-14	s__metagenome_g__norank_f__67-14	OTU3742	3	2	1	1	3	2	5	7	20	18	15	25	102
d__Bacteria	k__norank_d__Bacteria	p__Actinobacteriota	c__Acidimicrobiia	o__IMCC26256	f__norank_o__IMCC26256	g__norank_f__norank_o__IMCC26256	s__metagenome_g__norank_f__norank_o__IMCC26256	OTU2239	0	0	0	1	0	0	0	0	0	0	0	1	2
d__Bacteria	k__norank_d__Bacteria	p__Planctomycetota	c__Planctomycetes	o__Pirellulales	f__Pirellulaceae	g__norank_f__Pirellulaceae	s__unclassified_g__norank_f__Pirellulaceae	OTU3506	12	11	9	8	12	6	13	18	13	6	13	18	139
d__Bacteria	k__norank_d__Bacteria	p__Verrucomicrobiota	c__Verrucomicrobiae	o__Pedosphaerales	f__Pedosphaeraceae	g__unclassified_f__Pedosphaeraceae	s__unclassified_f__Pedosphaeraceae	OTU5567	0	0	0	0	0	0	0	0	0	0	0	1	1
d__Bacteria	k__norank_d__Bacteria	p__Dependentiae	c__Babeliae	o__Babeliales	f__Vermiphilaceae	g__norank_f__Vermiphilaceae	s__unclassified_g__norank_f__Vermiphilaceae	OTU4646	1	0	0	0	0	0	0	1	0	0	1	0	3
d__Bacteria	k__norank_d__Bacteria	p__Proteobacteria	c__Alphaproteobacteria	o__unclassified_c__Alphaproteobacteria	f__unclassified_c__Alphaproteobacteria	g__unclassified_c__Alphaproteobacteria	s__unclassified_c__Alphaproteobacteria	OTU780	0	2	1	1	1	0	1	1	1	1	0	0	9
d__Bacteria	k__norank_d__Bacteria	p__Gemmatimonadota	c__Gemmatimonadetes	o__Gemmatimonadales	f__Gemmatimonadaceae	g__norank_f__Gemmatimonadaceae	s__Gemmatimonadetes_bacterium_LX87	OTU4078	3	1	0	1	2	2	2	0	4	0	1	3	19
d__Bacteria	k__norank_d__Bacteria	p__Proteobacteria	c__Gammaproteobacteria	o__Burkholderiales	f__TRA3-20	g__norank_f__TRA3-20	s__uncultured_beta_proteobacterium_g__norank_f__TRA3-20	OTU4994	1	2	4	0	2	1	7	5	12	4	8	8	54
d__Bacteria	k__norank_d__Bacteria	p__Proteobacteria	c__Gammaproteobacteria	o__Cellvibrionales	f__Halieaceae	g__OM60NOR5_clade	s__uncultured_bacterium_g__OM60NOR5_clade	OTU3566	12	12	16	5	5	8	17	19	25	14	19	11	163
d__Bacteria	k__norank_d__Bacteria	p__Chloroflexi	c__Anaerolineae	o__SBR1031	f__norank_o__SBR1031	g__norank_f__norank_o__SBR1031	s__unclassified_g__norank_f__norank_o__SBR1031	OTU4149	0	0	0	0	0	0	3	1	0	1	0	0	5
d__Bacteria	k__norank_d__Bacteria	p__Planctomycetota	c__OM190	o__norank_c__OM190	f__norank_o__norank_c__OM190	g__norank_f__norank_o__norank_c__OM190	s__uncultured_soil_bacterium_g__norank_f__norank_o__norank_c__OM190	OTU488	0	1	0	0	0	0	0	0	0	0	1	0	2
d__Bacteria	k__norank_d__Bacteria	p__Planctomycetota	c__Planctomycetes	o__Gemmatales	f__Gemmataceae	g__norank_f__Gemmataceae	s__unclassified_g__norank_f__Gemmataceae	OTU5116	1	1	0	0	0	0	0	0	0	2	0	1	5
d__Bacteria	k__norank_d__Bacteria	p__Firmicutes	c__Limnochordia	o__M55-D21	f__norank_o__M55-D21	g__norank_f__norank_o__M55-D21	s__uncultured_bacterium_g__norank_f__norank_o__M55-D21	OTU2651	3	0	1	2	4	0	1	0	2	0	1	1	15
d__Bacteria	k__norank_d__Bacteria	p__Actinobacteriota	c__Actinobacteria	o__Propionibacteriales	f__Propionibacteriaceae	g__Haloactinopolyspora	s__uncultured_bacterium_g__Haloactinopolyspora	OTU2908	4	8	9	6	4	6	4	3	2	3	9	4	62
d__Bacteria	k__norank_d__Bacteria	p__Actinobacteriota	c__Acidimicrobiia	o__Microtrichales	f__Iamiaceae	g__Iamia	s__metagenome_g__Iamia	OTU2488	0	0	0	0	1	0	0	0	0	0	0	0	1
d__Bacteria	k__norank_d__Bacteria	p__Chloroflexi	c__Anaerolineae	o__SBR1031	f__norank_o__SBR1031	g__norank_f__norank_o__SBR1031	s__uncultured_bacterium_g__norank_f__norank_o__SBR1031	OTU5612	3	0	0	0	0	0	0	0	1	0	1	3	8
d__Bacteria	k__norank_d__Bacteria	p__Firmicutes	c__Clostridia	o__Clostridiales	f__Clostridiaceae	g__Clostridium_sensu_stricto_15	s__Clostridium_cochlearium	OTU3272	2	0	0	0	0	0	1	2	0	1	0	0	6
d__Bacteria	k__norank_d__Bacteria	p__Gemmatimonadota	c__Gemmatimonadetes	o__Gemmatimonadales	f__Gemmatimonadaceae	g__norank_f__Gemmatimonadaceae	s__uncultured_Gemmatimonadetes_bacterium_g__norank_f__Gemmatimonadaceae	OTU2726	10	9	8	3	6	5	5	5	8	6	7	6	78
d__Bacteria	k__norank_d__Bacteria	p__Chloroflexi	c__Anaerolineae	o__SBR1031	f__norank_o__SBR1031	g__norank_f__norank_o__SBR1031	s__uncultured_bacterium_g__norank_f__norank_o__SBR1031	OTU5445	0	0	0	0	0	0	0	0	0	0	0	3	3
d__Bacteria	k__norank_d__Bacteria	p__Proteobacteria	c__Alphaproteobacteria	o__Holosporales	f__Holosporaceae	g__norank_f__Holosporaceae	s__uncultured_bacterium_g__norank_f__Holosporaceae	OTU4932	1	0	0	0	1	0	2	0	3	1	0	0	8
d__Bacteria	k__norank_d__Bacteria	p__Myxococcota	c__Polyangia	o__Polyangiales	f__BIrii41	g__norank_f__BIrii41	s__uncultured_bacterium_g__norank_f__BIrii41	OTU5144	0	0	0	0	0	0	0	0	0	1	0	0	1
d__Bacteria	k__norank_d__Bacteria	p__Actinobacteriota	c__Acidimicrobiia	o__Microtrichales	f__Microtrichaceae	g__norank_f__Microtrichaceae	s__uncultured_Actinomycetales_bacterium_g__norank_f__Microtrichaceae	OTU5516	1	0	0	0	0	0	0	0	0	0	1	1	3
d__Bacteria	k__norank_d__Bacteria	p__Planctomycetota	c__Planctomycetes	o__Gemmatales	f__Gemmataceae	g__norank_f__Gemmataceae	s__uncultured_bacterium_g__norank_f__Gemmataceae	OTU2036	0	0	0	0	0	1	0	0	1	0	2	2	6
d__Bacteria	k__norank_d__Bacteria	p__Proteobacteria	c__Alphaproteobacteria	o__Sphingomonadales	f__Sphingomonadaceae	g__Novosphingobium	s__uncultured_Sphingomonadaceae_bacterium_g__Novosphingobium	OTU141	4	10	2	0	2	6	3	0	2	2	3	1	35
d__Bacteria	k__norank_d__Bacteria	p__Planctomycetota	c__Planctomycetes	o__Pirellulales	f__Pirellulaceae	g__unclassified_f__Pirellulaceae	s__unclassified_f__Pirellulaceae	OTU4547	2	0	0	2	3	0	1	2	2	0	2	4	18
d__Bacteria	k__norank_d__Bacteria	p__Firmicutes	c__unclassified_p__Firmicutes	o__unclassified_p__Firmicutes	f__unclassified_p__Firmicutes	g__unclassified_p__Firmicutes	s__unclassified_p__Firmicutes	OTU4439	0	0	0	0	0	0	1	1	0	0	1	0	3
d__Bacteria	k__norank_d__Bacteria	p__Planctomycetota	c__Planctomycetes	o__Planctomycetales	f__norank_o__Planctomycetales	g__norank_f__norank_o__Planctomycetales	s__metagenome_g__norank_f__norank_o__Planctomycetales	OTU4461	0	0	2	0	1	0	1	0	0	1	2	2	9
d__Bacteria	k__norank_d__Bacteria	p__Planctomycetota	c__Planctomycetes	o__Pirellulales	f__Pirellulaceae	g__unclassified_f__Pirellulaceae	s__unclassified_f__Pirellulaceae	OTU2107	3	1	3	7	3	2	2	3	2	2	2	4	34
d__Bacteria	k__norank_d__Bacteria	p__Armatimonadota	c__norank_p__Armatimonadota	o__norank_c__norank_p__Armatimonadota	f__norank_o__norank_c__norank_p__Armatimonadota	g__norank_f__norank_o__norank_c__norank_p__Armatimonadota	s__unclassified_g__norank_f__norank_o__norank_c__norank_p__Armatimonadota	OTU4240	0	0	0	0	0	0	1	0	1	0	0	0	2
d__Bacteria	k__norank_d__Bacteria	p__Planctomycetota	c__Planctomycetes	o__Gemmatales	f__Gemmataceae	g__norank_f__Gemmataceae	s__unclassified_g__norank_f__Gemmataceae	OTU2465	1	0	0	0	0	0	0	1	1	0	0	0	3
d__Bacteria	k__norank_d__Bacteria	p__Chloroflexi	c__JG30-KF-CM66	o__norank_c__JG30-KF-CM66	f__norank_o__norank_c__JG30-KF-CM66	g__norank_f__norank_o__norank_c__JG30-KF-CM66	s__unclassified_g__norank_f__norank_o__norank_c__JG30-KF-CM66	OTU152	0	1	0	1	1	2	0	0	0	2	2	1	10
d__Bacteria	k__norank_d__Bacteria	p__Entotheonellaeota	c__Entotheonellia	o__Entotheonellales	f__Entotheonellaceae	g__Candidatus_Entotheonella	s__uncultured_bacterium_g__Candidatus_Entotheonella	OTU2422	0	4	2	4	3	2	2	3	1	1	0	4	26
d__Bacteria	k__norank_d__Bacteria	p__Planctomycetota	c__vadinHA49	o__norank_c__vadinHA49	f__norank_o__norank_c__vadinHA49	g__norank_f__norank_o__norank_c__vadinHA49	s__unclassified_g__norank_f__norank_o__norank_c__vadinHA49	OTU4804	1	1	0	0	0	0	0	2	1	0	0	0	5
d__Bacteria	k__norank_d__Bacteria	p__Bacteroidota	c__unclassified_p__Bacteroidota	o__unclassified_p__Bacteroidota	f__unclassified_p__Bacteroidota	g__unclassified_p__Bacteroidota	s__unclassified_p__Bacteroidota	OTU532	0	1	0	0	1	0	0	0	1	0	0	0	3
d__Bacteria	k__norank_d__Bacteria	p__Chloroflexi	c__Chloroflexia	o__Thermomicrobiales	f__AKYG1722	g__norank_f__AKYG1722	s__unclassified_g__norank_f__AKYG1722	OTU2164	0	3	1	1	3	0	1	0	0	0	0	0	9
d__Bacteria	k__norank_d__Bacteria	p__Actinobacteriota	c__Actinobacteria	o__Streptosporangiales	f__Streptosporangiaceae	g__unclassified_f__Streptosporangiaceae	s__unclassified_f__Streptosporangiaceae	OTU2654	11	0	2	0	12	0	1	0	0	1	1	0	28
d__Bacteria	k__norank_d__Bacteria	p__Planctomycetota	c__Planctomycetes	o__Gemmatales	f__Gemmataceae	g__norank_f__Gemmataceae	s__uncultured_bacterium_g__norank_f__Gemmataceae	OTU2789	3	0	3	0	2	0	0	1	0	0	1	2	12
d__Bacteria	k__norank_d__Bacteria	p__Acidobacteriota	c__Vicinamibacteria	o__Subgroup_17	f__norank_o__Subgroup_17	g__norank_f__norank_o__Subgroup_17	s__unclassified_g__norank_f__norank_o__Subgroup_17	OTU3648	0	0	0	0	0	0	2	1	0	0	0	0	3
d__Bacteria	k__norank_d__Bacteria	p__Myxococcota	c__Polyangia	o__Haliangiales	f__Haliangiaceae	g__Haliangium	s__unclassified_g__Haliangium	OTU3331	1	0	0	0	0	0	1	1	0	0	0	0	3
d__Bacteria	k__norank_d__Bacteria	p__Verrucomicrobiota	c__Verrucomicrobiae	o__Pedosphaerales	f__Pedosphaeraceae	g__unclassified_f__Pedosphaeraceae	s__unclassified_f__Pedosphaeraceae	OTU2280	1	1	0	1	0	2	1	1	1	0	1	1	10
d__Bacteria	k__norank_d__Bacteria	p__Chloroflexi	c__Anaerolineae	o__Caldilineales	f__Caldilineaceae	g__Litorilinea	s__uncultured_bacterium_g__Litorilinea	OTU126	0	1	0	0	0	2	0	0	0	0	0	0	3
d__Bacteria	k__norank_d__Bacteria	p__Proteobacteria	c__Alphaproteobacteria	o__Rhizobiales	f__Rhodobiaceae	g__Afifella	s__uncultured_bacterium_g__Afifella	OTU4578	1	0	0	0	0	0	0	0	0	0	1	0	2
d__Bacteria	k__norank_d__Bacteria	p__Planctomycetota	c__Planctomycetes	o__Gemmatales	f__Gemmataceae	g__norank_f__Gemmataceae	s__unclassified_g__norank_f__Gemmataceae	OTU3406	0	0	2	0	0	1	2	3	6	2	1	4	21
d__Bacteria	k__norank_d__Bacteria	p__Bacteroidota	c__Bacteroidia	o__Chitinophagales	f__Chitinophagaceae	g__Arachidicoccus	s__unclassified_g__Arachidicoccus	OTU1665	3	0	1	1	1	7	0	0	0	0	0	1	14
d__Bacteria	k__norank_d__Bacteria	p__Acidobacteriota	c__Vicinamibacteria	o__Subgroup_17	f__norank_o__Subgroup_17	g__norank_f__norank_o__Subgroup_17	s__unclassified_g__norank_f__norank_o__Subgroup_17	OTU2818	7	4	12	9	10	3	10	19	16	5	8	9	112
d__Bacteria	k__norank_d__Bacteria	p__Chloroflexi	c__N9D0	o__norank_c__N9D0	f__norank_o__norank_c__N9D0	g__norank_f__norank_o__norank_c__N9D0	s__uncultured_bacterium_g__norank_f__norank_o__norank_c__N9D0	OTU2765	3	0	3	2	3	2	1	1	2	1	0	2	20
d__Bacteria	k__norank_d__Bacteria	p__Chloroflexi	c__Anaerolineae	o__SBR1031	f__norank_o__SBR1031	g__norank_f__norank_o__SBR1031	s__anaerobic_digester_metagenome_g__norank_f__norank_o__SBR1031	OTU1417	0	4	3	1	0	0	0	0	0	0	0	0	8
d__Bacteria	k__norank_d__Bacteria	p__Chloroflexi	c__Anaerolineae	o__Ardenticatenales	f__norank_o__Ardenticatenales	g__norank_f__norank_o__Ardenticatenales	s__unclassified_g__norank_f__norank_o__Ardenticatenales	OTU2748	2	3	2	6	0	7	2	5	2	4	8	5	46
d__Bacteria	k__norank_d__Bacteria	p__Actinobacteriota	c__Thermoleophilia	o__Solirubrobacterales	f__Solirubrobacteraceae	g__unclassified_f__Solirubrobacteraceae	s__unclassified_f__Solirubrobacteraceae	OTU1801	1	6	2	3	1	6	2	1	1	3	5	3	34
d__Bacteria	k__norank_d__Bacteria	p__Proteobacteria	c__Gammaproteobacteria	o__Diplorickettsiales	f__Diplorickettsiaceae	g__Aquicella	s__unclassified_g__Aquicella	OTU5180	1	1	0	0	1	0	0	0	0	1	4	1	9
d__Bacteria	k__norank_d__Bacteria	p__Chloroflexi	c__Chloroflexia	o__Chloroflexales	f__Herpetosiphonaceae	g__Herpetosiphon	s__unclassified_g__Herpetosiphon	OTU5176	0	1	0	0	0	0	0	0	0	1	2	0	4
d__Bacteria	k__norank_d__Bacteria	p__Deinococcota	c__Deinococci	o__Deinococcales	f__Trueperaceae	g__Truepera	s__uncultured_bacterium_g__Truepera	OTU2371	0	0	0	1	0	1	0	0	0	0	0	0	2
d__Bacteria	k__norank_d__Bacteria	p__Gemmatimonadota	c__Gemmatimonadetes	o__Gemmatimonadales	f__Gemmatimonadaceae	g__unclassified_f__Gemmatimonadaceae	s__unclassified_f__Gemmatimonadaceae	OTU650	0	0	2	0	1	1	0	1	0	1	2	0	8
d__Bacteria	k__norank_d__Bacteria	p__Planctomycetota	c__Phycisphaerae	o__Phycisphaerales	f__Phycisphaeraceae	g__SM1A02	s__uncultured_bacterium_g__SM1A02	OTU544	0	1	0	0	0	0	0	0	1	0	0	0	2
d__Bacteria	k__norank_d__Bacteria	p__Chloroflexi	c__Anaerolineae	o__SBR1031	f__norank_o__SBR1031	g__norank_f__norank_o__SBR1031	s__uncultured_soil_bacterium_g__norank_f__norank_o__SBR1031	OTU2936	3	2	2	3	3	3	2	6	3	2	4	4	37
d__Bacteria	k__norank_d__Bacteria	p__Proteobacteria	c__Gammaproteobacteria	o__Xanthomonadales	f__Xanthomonadaceae	g__Arenimonas	s__uncultured_bacterium_g__Arenimonas	OTU1605	17	15	12	13	17	9	8	7	7	7	4	15	131
d__Bacteria	k__norank_d__Bacteria	p__Nitrospirota	c__Leptospirillia	o__Leptospirillales	f__Leptospirillaceae	g__Leptospirillum	s__unclassified_g__Leptospirillum	OTU1306	3	2	3	3	2	2	0	2	2	6	3	3	31
d__Bacteria	k__norank_d__Bacteria	p__NB1-j	c__norank_p__NB1-j	o__norank_c__norank_p__NB1-j	f__norank_o__norank_c__norank_p__NB1-j	g__norank_f__norank_o__norank_c__norank_p__NB1-j	s__unclassified_g__norank_f__norank_o__norank_c__norank_p__NB1-j	OTU4086	1	1	0	4	1	1	0	2	3	2	1	4	20
d__Bacteria	k__norank_d__Bacteria	p__Firmicutes	c__Bacilli	o__Bacillales	f__Planococcaceae	g__Lysinibacillus	s__uncultured_bacterium_g__Lysinibacillus	OTU3530	37	37	34	44	25	29	46	61	52	46	47	50	508
d__Bacteria	k__norank_d__Bacteria	p__Proteobacteria	c__Gammaproteobacteria	o__Gammaproteobacteria_Incertae_Sedis	f__unclassified_o__Gammaproteobacteria_Incertae_Sedis	g__norank_f__unclassified	s__unclassified_g__norank_f__unclassified	OTU685	3	2	4	3	3	2	22	24	13	22	18	9	125
d__Bacteria	k__norank_d__Bacteria	p__Gemmatimonadota	c__Gemmatimonadetes	o__Gemmatimonadales	f__Gemmatimonadaceae	g__Gemmatimonas	s__unclassified_g__Gemmatimonas	OTU5289	0	1	2	0	0	0	0	0	0	1	0	0	4
d__Bacteria	k__norank_d__Bacteria	p__Actinobacteriota	c__Thermoleophilia	o__Gaiellales	f__Gaiellaceae	g__Gaiella	s__uncultured_organism_g__Gaiella	OTU1418	5	8	6	7	2	11	14	8	5	5	5	4	80
d__Bacteria	k__norank_d__Bacteria	p__Gemmatimonadota	c__Gemmatimonadetes	o__Gemmatimonadales	f__Gemmatimonadaceae	g__norank_f__Gemmatimonadaceae	s__uncultured_bacterium_g__norank_f__Gemmatimonadaceae	OTU2713	1	1	2	2	1	1	0	2	1	2	2	6	21
d__Bacteria	k__norank_d__Bacteria	p__Planctomycetota	c__Pla4_lineage	o__norank_c__Pla4_lineage	f__norank_o__norank_c__Pla4_lineage	g__norank_f__norank_o__norank_c__Pla4_lineage	s__unclassified_g__norank_f__norank_o__norank_c__Pla4_lineage	OTU3477	13	8	11	11	11	8	9	17	20	7	7	17	139
d__Bacteria	k__norank_d__Bacteria	p__Dependentiae	c__Babeliae	o__Babeliales	f__Vermiphilaceae	g__norank_f__Vermiphilaceae	s__unclassified_g__norank_f__Vermiphilaceae	OTU561	0	3	0	0	0	0	1	0	1	0	0	2	7
d__Bacteria	k__norank_d__Bacteria	p__Planctomycetota	c__Planctomycetes	o__Planctomycetales	f__Rubinisphaeraceae	g__SH-PL14	s__uncultured_bacterium_g__SH-PL14	OTU2668	6	14	11	7	9	6	2	13	7	5	5	9	94
d__Bacteria	k__norank_d__Bacteria	p__Cyanobacteria	c__Sericytochromatia	o__norank_c__Sericytochromatia	f__norank_o__norank_c__Sericytochromatia	g__norank_f__norank_o__norank_c__Sericytochromatia	s__unclassified_g__norank_f__norank_o__norank_c__Sericytochromatia	OTU5219	0	1	2	0	0	0	0	1	1	1	0	0	6
d__Bacteria	k__norank_d__Bacteria	p__Planctomycetota	c__Phycisphaerae	o__Tepidisphaerales	f__WD2101_soil_group	g__norank_f__WD2101_soil_group	s__uncultured_bacterium_g__norank_f__WD2101_soil_group	OTU1763	19	14	28	19	15	17	8	18	20	9	17	16	200
d__Bacteria	k__norank_d__Bacteria	p__Planctomycetota	c__Phycisphaerae	o__S-70	f__norank_o__S-70	g__norank_f__norank_o__S-70	s__uncultured_bacterium_g__norank_f__norank_o__S-70	OTU2412	1	0	0	0	1	0	0	0	0	0	0	0	2
d__Bacteria	k__norank_d__Bacteria	p__Chloroflexi	c__Chloroflexia	o__Thermomicrobiales	f__JG30-KF-CM45	g__norank_f__JG30-KF-CM45	s__metagenome_g__norank_f__JG30-KF-CM45	OTU3685	1	0	1	0	0	0	2	0	0	0	1	0	5
d__Bacteria	k__norank_d__Bacteria	p__Proteobacteria	c__Gammaproteobacteria	o__Burkholderiales	f__TRA3-20	g__norank_f__TRA3-20	s__uncultured_bacterium_g__norank_f__TRA3-20	OTU5210	38	38	46	46	37	29	50	39	47	57	51	64	542
d__Bacteria	k__norank_d__Bacteria	p__Actinobacteriota	c__unclassified_p__Actinobacteriota	o__unclassified_p__Actinobacteriota	f__unclassified_p__Actinobacteriota	g__unclassified_p__Actinobacteriota	s__unclassified_p__Actinobacteriota	OTU5322	0	0	0	0	0	0	0	0	0	0	2	0	2
d__Bacteria	k__norank_d__Bacteria	p__Verrucomicrobiota	c__Verrucomicrobiae	o__Pedosphaerales	f__Pedosphaeraceae	g__norank_f__Pedosphaeraceae	s__uncultured_soil_bacterium_g__norank_f__Pedosphaeraceae	OTU3770	17	5	5	8	8	5	14	12	9	4	5	15	107
d__Bacteria	k__norank_d__Bacteria	p__Patescibacteria	c__Saccharimonadia	o__Saccharimonadales	f__norank_o__Saccharimonadales	g__norank_f__norank_o__Saccharimonadales	s__unclassified_g__norank_f__norank_o__Saccharimonadales	OTU4498	5	7	5	9	5	9	0	1	0	2	1	5	49
d__Bacteria	k__norank_d__Bacteria	p__Spirochaetota	c__Spirochaetia	o__Spirochaetales	f__Spirochaetaceae	g__unclassified_f__Spirochaetaceae	s__unclassified_f__Spirochaetaceae	OTU4504	0	0	0	0	0	1	0	2	1	0	1	2	7
d__Bacteria	k__norank_d__Bacteria	p__Planctomycetota	c__Planctomycetes	o__Planctomycetales	f__Rubinisphaeraceae	g__Planctomicrobium	s__uncultured_Planctomyces_sp._g__Planctomicrobium	OTU808	2	2	1	1	1	0	0	0	1	2	1	1	12
d__Bacteria	k__norank_d__Bacteria	p__Actinobacteriota	c__MB-A2-108	o__norank_c__MB-A2-108	f__norank_o__norank_c__MB-A2-108	g__norank_f__norank_o__norank_c__MB-A2-108	s__uncultured_actinobacterium_g__norank_f__norank_o__norank_c__MB-A2-108	OTU2744	6	5	4	6	4	4	1	3	1	1	1	2	38
d__Bacteria	k__norank_d__Bacteria	p__Proteobacteria	c__Gammaproteobacteria	o__Coxiellales	f__Coxiellaceae	g__Coxiella	s__uncultured_bacterium_g__Coxiella	OTU1931	0	0	2	0	1	1	0	0	0	1	1	0	6
d__Bacteria	k__norank_d__Bacteria	p__Chloroflexi	c__Anaerolineae	o__Ardenticatenales	f__norank_o__Ardenticatenales	g__norank_f__norank_o__Ardenticatenales	s__uncultured_bacterium_g__norank_f__norank_o__Ardenticatenales	OTU1668	10	3	8	9	9	2	4	12	5	6	8	5	81
d__Bacteria	k__norank_d__Bacteria	p__Firmicutes	c__Bacilli	o__Alicyclobacillales	f__Alicyclobacillaceae	g__Effusibacillus	s__unclassified_g__Effusibacillus	OTU3795	1	1	1	1	0	0	2	0	0	1	0	0	7
d__Bacteria	k__norank_d__Bacteria	p__Acidobacteriota	c__Thermoanaerobaculia	o__Thermoanaerobaculales	f__Thermoanaerobaculaceae	g__Subgroup_10	s__uncultured_bacterium_g__Subgroup_10	OTU4178	21	17	26	16	18	23	23	25	22	25	25	20	261
d__Bacteria	k__norank_d__Bacteria	p__Planctomycetota	c__OM190	o__norank_c__OM190	f__norank_o__norank_c__OM190	g__norank_f__norank_o__norank_c__OM190	s__uncultured_bacterium_g__norank_f__norank_o__norank_c__OM190	OTU1867	0	2	1	0	0	0	0	0	0	0	0	0	3
d__Bacteria	k__norank_d__Bacteria	p__Chloroflexi	c__Dehalococcoidia	o__SAR202_clade	f__norank_o__SAR202_clade	g__norank_f__norank_o__SAR202_clade	s__unclassified_g__norank_f__norank_o__SAR202_clade	OTU2262	0	1	2	3	1	3	0	2	0	0	2	0	14
d__Bacteria	k__norank_d__Bacteria	p__Cyanobacteria	c__Sericytochromatia	o__norank_c__Sericytochromatia	f__norank_o__norank_c__Sericytochromatia	g__norank_f__norank_o__norank_c__Sericytochromatia	s__uncultured_bacterium_g__norank_f__norank_o__norank_c__Sericytochromatia	OTU4859	0	0	0	0	0	0	0	0	1	0	0	0	1
d__Bacteria	k__norank_d__Bacteria	p__Planctomycetota	c__Planctomycetes	o__Gemmatales	f__Gemmataceae	g__norank_f__Gemmataceae	s__unclassified_g__norank_f__Gemmataceae	OTU2858	0	0	0	1	0	0	0	0	1	0	0	0	2
d__Bacteria	k__norank_d__Bacteria	p__Firmicutes	c__Bacilli	o__Paenibacillales	f__Paenibacillaceae	g__Paenibacillus	s__unclassified_g__Paenibacillus	OTU451	1	1	0	3	1	2	1	2	2	2	2	1	18
d__Bacteria	k__norank_d__Bacteria	p__Bacteroidota	c__Bacteroidia	o__Chitinophagales	f__Chitinophagaceae	g__Pseudoflavitalea	s__Pseudoflavitalea_rhizosphaerae	OTU1739	0	1	1	0	0	1	0	0	0	0	0	0	3
d__Bacteria	k__norank_d__Bacteria	p__Bdellovibrionota	c__Oligoflexia	o__0319-6G20	f__norank_o__0319-6G20	g__norank_f__norank_o__0319-6G20	s__unclassified_g__norank_f__norank_o__0319-6G20	OTU5280	1	0	0	2	1	2	1	0	1	3	0	0	11
d__Bacteria	k__norank_d__Bacteria	p__Planctomycetota	c__Planctomycetes	o__Gemmatales	f__Gemmataceae	g__norank_f__Gemmataceae	s__unclassified_g__norank_f__Gemmataceae	OTU1440	3	1	1	2	3	1	0	5	5	1	3	6	31
d__Bacteria	k__norank_d__Bacteria	p__Actinobacteriota	c__Thermoleophilia	o__unclassified_c__Thermoleophilia	f__unclassified_c__Thermoleophilia	g__unclassified_c__Thermoleophilia	s__unclassified_c__Thermoleophilia	OTU5577	0	0	0	0	0	0	0	0	0	0	0	2	2
d__Bacteria	k__norank_d__Bacteria	p__Actinobacteriota	c__Acidimicrobiia	o__IMCC26256	f__norank_o__IMCC26256	g__norank_f__norank_o__IMCC26256	s__unclassified_g__norank_f__norank_o__IMCC26256	OTU3574	0	0	0	0	1	0	3	0	2	2	0	3	11
d__Bacteria	k__norank_d__Bacteria	p__NB1-j	c__norank_p__NB1-j	o__norank_c__norank_p__NB1-j	f__norank_o__norank_c__norank_p__NB1-j	g__norank_f__norank_o__norank_c__norank_p__NB1-j	s__uncultured_marine_bacterium_g__norank_f__norank_o__norank	OTU3040	2	1	2	3	1	1	1	1	0	4	1	2	19
d__Bacteria	k__norank_d__Bacteria	p__Actinobacteriota	c__Actinobacteria	o__Micrococcales	f__Intrasporangiaceae	g__Knoellia	s__uncultured_bacterium_g__Knoellia	OTU2423	8	5	6	8	3	4	3	3	4	1	9	5	59
d__Bacteria	k__norank_d__Bacteria	p__Bacteroidota	c__Bacteroidia	o__Sphingobacteriales	f__NS11-12_marine_group	g__norank_f__NS11-12_marine_group	s__unclassified_g__norank_f__NS11-12_marine_group	OTU726	1	0	0	0	0	1	0	0	0	1	0	0	3
d__Bacteria	k__norank_d__Bacteria	p__Planctomycetota	c__OM190	o__norank_c__OM190	f__norank_o__norank_c__OM190	g__norank_f__norank_o__norank_c__OM190	s__unclassified_g__norank_f__norank_o__norank_c__OM190	OTU1521	4	6	0	1	2	1	7	6	9	7	13	9	65
d__Bacteria	k__norank_d__Bacteria	p__Chloroflexi	c__Dehalococcoidia	o__SAR202_clade	f__norank_o__SAR202_clade	g__norank_f__norank_o__SAR202_clade	s__uncultured_soil_bacterium_g__norank_f__norank_o__SAR202_clade	OTU5138	0	2	0	1	0	0	0	0	1	1	2	0	7
d__Bacteria	k__norank_d__Bacteria	p__Gemmatimonadota	c__Longimicrobia	o__Longimicrobiales	f__Longimicrobiaceae	g__unclassified_f__Longimicrobiaceae	s__unclassified_f__Longimicrobiaceae	OTU5324	1	0	0	1	0	1	0	0	0	0	1	0	4
d__Bacteria	k__norank_d__Bacteria	p__Planctomycetota	c__Planctomycetes	o__Pirellulales	f__Pirellulaceae	g__unclassified_f__Pirellulaceae	s__unclassified_f__Pirellulaceae	OTU1917	4	2	3	5	3	0	11	12	9	6	16	9	80
d__Bacteria	k__norank_d__Bacteria	p__Firmicutes	c__Limnochordia	o__Limnochordales	f__Limnochordaceae	g__Limnochorda	s__uncultured_bacterium_g__Limnochorda	OTU628	4	1	2	1	1	1	1	6	1	1	2	0	21
d__Bacteria	k__norank_d__Bacteria	p__Actinobacteriota	c__MB-A2-108	o__norank_c__MB-A2-108	f__norank_o__norank_c__MB-A2-108	g__norank_f__norank_o__norank_c__MB-A2-108	s__uncultured_bacterium_0425-2M17	OTU3597	0	0	0	0	0	0	1	2	1	0	0	3	7
d__Bacteria	k__norank_d__Bacteria	p__Patescibacteria	c__unclassified_p__Patescibacteria	o__unclassified_p__Patescibacteria	f__unclassified_p__Patescibacteria	g__unclassified_p__Patescibacteria	s__unclassified_p__Patescibacteria	OTU1501	0	0	1	0	0	0	0	0	0	0	0	1	2
d__Bacteria	k__norank_d__Bacteria	p__Verrucomicrobiota	c__Verrucomicrobiae	o__Pedosphaerales	f__Pedosphaeraceae	g__unclassified_f__Pedosphaeraceae	s__unclassified_f__Pedosphaeraceae	OTU2426	0	1	0	0	1	0	0	1	0	0	0	0	3
d__Bacteria	k__norank_d__Bacteria	p__Acidobacteriota	c__Acidobacteriae	o__Bryobacterales	f__Bryobacteraceae	g__Bryobacter	s__uncultured_Acidobacteria_bacterium_g__Bryobacter	OTU4272	5	1	1	5	5	3	3	2	1	5	2	0	33
d__Bacteria	k__norank_d__Bacteria	p__Planctomycetota	c__Planctomycetes	o__Pirellulales	f__Pirellulaceae	g__norank_f__Pirellulaceae	s__uncultured_bacterium_g__norank_f__Pirellulaceae	OTU3702	1	0	2	2	2	1	0	0	4	0	0	1	13
d__Bacteria	k__norank_d__Bacteria	p__Proteobacteria	c__Alphaproteobacteria	o__Rhizobiales	f__Xanthobacteraceae	g__Rhodopseudomonas	s__Rhodopseudomonas_palustris_g__Rhodopseudomonas	OTU1863	1	4	2	4	0	0	2	0	1	1	0	1	16
d__Bacteria	k__norank_d__Bacteria	p__Patescibacteria	c__Saccharimonadia	o__Saccharimonadales	f__norank_o__Saccharimonadales	g__norank_f__norank_o__Saccharimonadales	s__unclassified_g__norank_f__norank_o__Saccharimonadales	OTU5386	0	1	0	0	0	0	0	0	0	1	3	1	6
d__Bacteria	k__norank_d__Bacteria	p__Verrucomicrobiota	c__Omnitrophia	o__Omnitrophales	f__norank_o__Omnitrophales	g__norank_f__norank_o__Omnitrophales	s__uncultured_bacterium_g__norank_f__norank_o__Omnitrophales	OTU3690	1	0	0	0	0	0	1	1	0	0	0	0	3
d__Bacteria	k__norank_d__Bacteria	p__Armatimonadota	c__norank_p__Armatimonadota	o__norank_c__norank_p__Armatimonadota	f__norank_o__norank_c__norank_p__Armatimonadota	g__norank_f__norank_o__norank_c__norank_p__Armatimonadota	s__uncultured_bacterium_g__norank_f__norank_o__norank_c__norank_p__Armatimonadota	OTU3863	4	2	9	3	4	3	2	5	6	2	5	5	50
d__Bacteria	k__norank_d__Bacteria	p__Firmicutes	c__Limnochordia	o__Limnochordales	f__Limnochordaceae	g__norank_f__Limnochordaceae	s__uncultured_bacterium_g__norank_f__Limnochordaceae	OTU1313	1	1	1	1	1	0	0	1	0	0	0	0	6
d__Bacteria	k__norank_d__Bacteria	p__Bacteroidota	c__Bacteroidia	o__Flavobacteriales	f__Flavobacteriaceae	g__Flavobacterium	s__unclassified_g__Flavobacterium	OTU2243	0	1	2	6	0	0	0	0	1	1	1	1	13
d__Bacteria	k__norank_d__Bacteria	p__Desulfobacterota	c__norank_p__Desulfobacterota	o__norank_c__norank_p__Desulfobacterota	f__norank_o__norank_c__norank_p__Desulfobacterota	g__norank_f__norank_o__norank_c__norank_p__Desulfobacterota	s__Myxococcales_bacterium_enrichment_culture_clone_11380	OTU1395	3	4	1	4	3	1	3	2	1	2	1	2	27
d__Bacteria	k__norank_d__Bacteria	p__Myxococcota	c__Polyangia	o__Haliangiales	f__Haliangiaceae	g__Haliangium	s__uncultured_bacterium_g__Haliangium	OTU923	3	2	4	8	4	1	4	5	9	5	5	4	54
d__Bacteria	k__norank_d__Bacteria	p__Acidobacteriota	c__Blastocatellia	o__DS-100	f__norank_o__DS-100	g__norank_f__norank_o__DS-100	s__uncultured_bacterium_g__norank_f__norank_o__DS-100	OTU2892	22	13	19	16	17	14	25	26	33	14	20	23	242
d__Bacteria	k__norank_d__Bacteria	p__Acidobacteriota	c__Acidobacteriae	o__Bryobacterales	f__Bryobacteraceae	g__Bryobacter	s__uncultured_soil_bacterium_g__Bryobacter	OTU1477	6	6	8	8	6	2	9	8	9	4	4	2	72
d__Bacteria	k__norank_d__Bacteria	p__Actinobacteriota	c__Acidimicrobiia	o__IMCC26256	f__norank_o__IMCC26256	g__norank_f__norank_o__IMCC26256	s__unclassified_g__norank_f__norank_o__IMCC26256	OTU173	2	4	4	3	1	3	2	0	2	3	3	1	28
d__Bacteria	k__norank_d__Bacteria	p__Proteobacteria	c__Gammaproteobacteria	o__Steroidobacterales	f__Steroidobacteraceae	g__Steroidobacter	s__unclassified_g__Steroidobacter	OTU3401	6	11	3	2	5	6	8	6	2	4	1	7	61
d__Bacteria	k__norank_d__Bacteria	p__Actinobacteriota	c__Acidimicrobiia	o__IMCC26256	f__norank_o__IMCC26256	g__norank_f__norank_o__IMCC26256	s__unclassified_g__norank_f__norank_o__IMCC26256	OTU171	0	1	0	0	0	2	0	0	0	0	0	0	3
d__Bacteria	k__norank_d__Bacteria	p__Firmicutes	c__Clostridia	o__unclassified_c__Clostridia	f__unclassified_c__Clostridia	g__unclassified_c__Clostridia	s__unclassified_c__Clostridia	OTU5504	1	0	0	0	0	0	0	0	0	0	0	1	2
d__Bacteria	k__norank_d__Bacteria	p__NB1-j	c__norank_p__NB1-j	o__norank_c__norank_p__NB1-j	f__norank_o__norank_c__norank_p__NB1-j	g__norank_f__norank_o__norank_c__norank_p__NB1-j	s__unclassified_g__norank_f__norank_o__norank_c__norank_p__NB1-j	OTU914	3	6	2	2	2	4	12	5	4	9	7	1	57
d__Bacteria	k__norank_d__Bacteria	p__Proteobacteria	c__Alphaproteobacteria	o__Rhizobiales	f__Methyloligellaceae	g__unclassified_f__Methyloligellaceae	s__unclassified_f__Methyloligellaceae	OTU4407	36	26	20	25	23	20	28	39	24	36	44	28	349
d__Bacteria	k__norank_d__Bacteria	p__Actinobacteriota	c__Acidimicrobiia	o__Actinomarinales	f__norank_o__Actinomarinales	g__norank_f__norank_o__Actinomarinales	s__unclassified_g__norank_f__norank_o__Actinomarinales	OTU3101	306	299	338	340	284	344	254	239	226	302	275	269	3476
d__Bacteria	k__norank_d__Bacteria	p__Planctomycetota	c__Planctomycetes	o__Planctomycetales	f__norank_o__Planctomycetales	g__norank_f__norank_o__Planctomycetales	s__unclassified_g__norank_f__norank_o__Planctomycetales	OTU990	0	0	1	0	1	1	1	0	0	0	2	2	8
d__Bacteria	k__norank_d__Bacteria	p__Proteobacteria	c__Alphaproteobacteria	o__Dongiales	f__Dongiaceae	g__Dongia	s__uncultured_Rhodospirillales_bacterium_g__Dongia	OTU1001	49	58	55	51	44	54	31	41	52	78	51	48	612
d__Bacteria	k__norank_d__Bacteria	p__Planctomycetota	c__OM190	o__norank_c__OM190	f__norank_o__norank_c__OM190	g__norank_f__norank_o__norank_c__OM190	s__uncultured_bacterium_g__norank_f__norank_o__norank_c__OM190	OTU2088	0	0	2	0	1	0	1	0	0	0	1	3	8
d__Bacteria	k__norank_d__Bacteria	p__Latescibacterota	c__norank_p__Latescibacterota	o__norank_c__norank_p__Latescibacterota	f__norank_o__norank_c__norank_p__Latescibacterota	g__norank_f__norank_o__norank_c__norank_p__Latescibacterota	s__uncultured_Pelobacter_sp._g__norank	OTU2044	1	2	1	1	1	0	0	1	1	0	1	0	9
d__Bacteria	k__norank_d__Bacteria	p__Chloroflexi	c__Anaerolineae	o__Ardenticatenales	f__Ardenticatenaceae	g__norank_f__Ardenticatenaceae	s__unclassified_g__norank_f__Ardenticatenaceae	OTU2479	1	2	0	0	1	0	0	0	0	0	0	0	4
d__Bacteria	k__norank_d__Bacteria	p__Chloroflexi	c__Anaerolineae	o__RBG-13-54-9	f__norank_o__RBG-13-54-9	g__norank_f__norank_o__RBG-13-54-9	s__uncultured_sludge_bacterium_A31	OTU4417	1	0	0	0	0	1	1	0	0	2	0	3	8
d__Bacteria	k__norank_d__Bacteria	p__Acidobacteriota	c__Acidobacteriae	o__Subgroup_2	f__norank_o__Subgroup_2	g__norank_f__norank_o__Subgroup_2	s__uncultured_bacterium_g__norank_f__norank_o__Subgroup_2	OTU1694	4	4	9	9	3	2	2	7	1	3	3	5	52
d__Bacteria	k__norank_d__Bacteria	p__Firmicutes	c__Clostridia	o__norank_c__Clostridia	f__Hungateiclostridiaceae	g__unclassified_f__Hungateiclostridiaceae	s__unclassified_f__Hungateiclostridiaceae	OTU907	1	0	2	1	1	0	2	2	1	3	1	2	16
d__Bacteria	k__norank_d__Bacteria	p__Proteobacteria	c__Gammaproteobacteria	o__Legionellales	f__Legionellaceae	g__Legionella	s__unclassified_g__Legionella	OTU5260	0	1	1	0	0	0	0	0	0	1	1	0	4
d__Bacteria	k__norank_d__Bacteria	p__Patescibacteria	c__Saccharimonadia	o__Saccharimonadales	f__LWQ8	g__norank_f__LWQ8	s__uncultured_bacterium_g__norank_f__LWQ8	OTU224	0	0	0	1	0	0	0	0	1	1	0	0	3
d__Bacteria	k__norank_d__Bacteria	p__Bacteroidota	c__Bacteroidia	o__Sphingobacteriales	f__AKYH767	g__norank_f__AKYH767	s__uncultured_Bacteroidetes_bacterium_g__norank_f__AKYH767	OTU2070	1	0	0	1	0	0	0	2	0	1	1	1	7
d__Bacteria	k__norank_d__Bacteria	p__Chloroflexi	c__Chloroflexia	o__Chloroflexales	f__Roseiflexaceae	g__norank_f__Roseiflexaceae	s__unclassified_g__norank_f__Roseiflexaceae	OTU1833	2	4	3	2	3	6	3	4	1	1	3	2	34
d__Bacteria	k__norank_d__Bacteria	p__Chloroflexi	c__Anaerolineae	o__Caldilineales	f__Caldilineaceae	g__unclassified_f__Caldilineaceae	s__unclassified_f__Caldilineaceae	OTU4400	7	7	5	5	9	5	9	5	13	4	8	4	81
d__Bacteria	k__norank_d__Bacteria	p__Actinobacteriota	c__Actinobacteria	o__Propionibacteriales	f__Propionibacteriaceae	g__Microlunatus	s__uncultured_bacterium_g__Microlunatus	OTU4298	15	18	10	19	14	15	9	11	6	5	3	7	132
d__Bacteria	k__norank_d__Bacteria	p__Myxococcota	c__Polyangia	o__Polyangiales	f__Sandaracinaceae	g__Sandaracinus	s__uncultured_bacterium_g__Sandaracinus	OTU1814	3	6	12	4	3	6	5	5	3	6	2	2	57
d__Bacteria	k__norank_d__Bacteria	p__Myxococcota	c__bacteriap25	o__norank_c__bacteriap25	f__norank_o__norank_c__bacteriap25	g__norank_f__norank_o__norank_c__bacteriap25	s__uncultured_Myxococcales_bacterium_g__norank_f__norank_o__norank	OTU3082	1	0	3	1	2	0	5	1	0	1	0	0	14
d__Bacteria	k__norank_d__Bacteria	p__Bdellovibrionota	c__Oligoflexia	o__0319-6G20	f__norank_o__0319-6G20	g__norank_f__norank_o__0319-6G20	s__unclassified_g__norank_f__norank_o__0319-6G20	OTU464	2	2	1	0	1	0	2	1	2	0	0	4	15
d__Bacteria	k__norank_d__Bacteria	p__Firmicutes	c__Clostridia	o__norank_c__Clostridia	f__Hungateiclostridiaceae	g__Pseudoclostridium	s__Pseudoclostridium_thermosuccinogenes	OTU5407	1	0	0	2	0	1	1	0	3	3	2	1	14
d__Bacteria	k__norank_d__Bacteria	p__Verrucomicrobiota	c__Verrucomicrobiae	o__unclassified_c__Verrucomicrobiae	f__unclassified_c__Verrucomicrobiae	g__unclassified_c__Verrucomicrobiae	s__unclassified_c__Verrucomicrobiae	OTU986	1	0	1	1	0	1	0	0	0	0	1	0	5
d__Bacteria	k__norank_d__Bacteria	p__Firmicutes	c__Bacilli	o__Bacillales	f__unclassified_o__Bacillales	g__unclassified_o__Bacillales	s__unclassified_o__Bacillales	OTU5331	0	0	0	0	0	0	0	0	1	0	1	0	2
d__Bacteria	k__norank_d__Bacteria	p__Planctomycetota	c__OM190	o__norank_c__OM190	f__norank_o__norank_c__OM190	g__norank_f__norank_o__norank_c__OM190	s__unclassified_g__norank_f__norank_o__norank_c__OM190	OTU3769	0	0	0	0	0	0	2	1	0	1	0	2	6
d__Bacteria	k__norank_d__Bacteria	p__Fibrobacterota	c__Fibrobacteria	o__Fibrobacterales	f__norank_o__Fibrobacterales	g__BBMC-4	s__uncultured_bacterium_g__BBMC-4	OTU179	0	1	0	0	0	0	0	1	0	0	0	0	2
d__Bacteria	k__norank_d__Bacteria	p__Dependentiae	c__Babeliae	o__Babeliales	f__unclassified_o__Babeliales	g__unclassified_o__Babeliales	s__unclassified_o__Babeliales	OTU4013	0	0	0	0	0	0	4	0	0	1	5	0	10
d__Bacteria	k__norank_d__Bacteria	p__Chloroflexi	c__Anaerolineae	o__Ardenticatenales	f__Ardenticatenaceae	g__norank_f__Ardenticatenaceae	s__unclassified_g__norank_f__Ardenticatenaceae	OTU5121	0	0	3	1	0	1	1	0	0	2	0	0	8
d__Bacteria	k__norank_d__Bacteria	p__Myxococcota	c__Polyangia	o__Polyangiales	f__Sandaracinaceae	g__norank_f__Sandaracinaceae	s__metagenome_g__norank_f__Sandaracinaceae	OTU3110	0	2	1	1	1	1	0	0	0	2	0	3	11
d__Bacteria	k__norank_d__Bacteria	p__Armatimonadota	c__norank_p__Armatimonadota	o__norank_c__norank_p__Armatimonadota	f__norank_o__norank_c__norank_p__Armatimonadota	g__norank_f__norank_o__norank_c__norank_p__Armatimonadota	s__uncultured_bacterium_g__norank_f__norank_o__norank_c__norank_p__Armatimonadota	OTU2146	5	2	1	3	12	5	0	2	4	2	0	5	41
d__Bacteria	k__norank_d__Bacteria	p__Planctomycetota	c__Planctomycetes	o__Gemmatales	f__Gemmataceae	g__Gemmata	s__uncultured_endolithic_bacterium_g__Gemmata	OTU933	28	29	25	26	26	13	11	29	30	4	27	28	276
d__Bacteria	k__norank_d__Bacteria	p__Verrucomicrobiota	c__Verrucomicrobiae	o__Pedosphaerales	f__Pedosphaeraceae	g__unclassified_f__Pedosphaeraceae	s__unclassified_f__Pedosphaeraceae	OTU1243	3	4	4	0	0	2	1	4	4	1	4	7	34
d__Bacteria	k__norank_d__Bacteria	p__Proteobacteria	c__Gammaproteobacteria	o__unclassified_c__Gammaproteobacteria	f__unclassified_c__Gammaproteobacteria	g__unclassified_c__Gammaproteobacteria	s__unclassified_c__Gammaproteobacteria	OTU3293	2	2	2	0	2	2	2	0	1	1	1	1	16
d__Bacteria	k__norank_d__Bacteria	p__Proteobacteria	c__Alphaproteobacteria	o__Rhizobiales	f__Hyphomicrobiaceae	g__Hyphomicrobium	s__unclassified_g__Hyphomicrobium	OTU3622	5	8	8	12	9	6	7	6	9	7	16	10	103
d__Bacteria	k__norank_d__Bacteria	p__Firmicutes	c__Bacilli	o__Thermoactinomycetales	f__Thermoactinomycetaceae	g__norank_f__Thermoactinomycetaceae	s__uncultured_bacterium_g__norank_f__Thermoactinomycetaceae	OTU5563	11	28	10	15	8	11	11	10	10	31	15	17	177
d__Bacteria	k__norank_d__Bacteria	p__Patescibacteria	c__Saccharimonadia	o__Saccharimonadales	f__WWH38	g__norank_f__WWH38	s__uncultured_bacterium_g__norank_f__WWH38	OTU5282	1	0	0	0	0	0	0	0	0	1	0	0	2
d__Bacteria	k__norank_d__Bacteria	p__Proteobacteria	c__Gammaproteobacteria	o__Steroidobacterales	f__Steroidobacteraceae	g__Steroidobacter	s__uncultured_soil_bacterium_g__Steroidobacter	OTU4967	0	0	1	0	0	0	1	0	2	3	0	0	7
d__Bacteria	k__norank_d__Bacteria	p__unclassified_k__norank_d__Bacteria	c__unclassified_k__norank_d__Bacteria	o__unclassified_k__norank_d__Bacteria	f__unclassified_k__norank_d__Bacteria	g__unclassified_k__norank_d__Bacteria	s__unclassified_k__norank_d__Bacteria	OTU3338	1	0	0	0	0	0	0	1	0	0	0	1	3
d__Bacteria	k__norank_d__Bacteria	p__Gemmatimonadota	c__Gemmatimonadetes	o__Gemmatimonadales	f__Gemmatimonadaceae	g__norank_f__Gemmatimonadaceae	s__unclassified_g__norank_f__Gemmatimonadaceae	OTU687	0	0	1	0	0	1	1	2	1	2	1	0	9
d__Bacteria	k__norank_d__Bacteria	p__Bdellovibrionota	c__Oligoflexia	o__Oligoflexales	f__norank_o__Oligoflexales	g__norank_f__norank_o__Oligoflexales	s__unclassified_g__norank_f__norank_o__Oligoflexales	OTU4782	0	0	0	0	0	1	0	1	0	0	0	0	2
d__Bacteria	k__norank_d__Bacteria	p__Proteobacteria	c__Gammaproteobacteria	o__Diplorickettsiales	f__Diplorickettsiaceae	g__Aquicella	s__unclassified_g__Aquicella	OTU440	0	1	0	0	0	0	0	0	0	0	0	0	1
d__Bacteria	k__norank_d__Bacteria	p__Proteobacteria	c__Alphaproteobacteria	o__Rhizobiales	f__unclassified_o__Rhizobiales	g__unclassified_o__Rhizobiales	s__unclassified_o__Rhizobiales	OTU378	1	0	2	0	1	1	1	0	0	1	0	3	10
d__Bacteria	k__norank_d__Bacteria	p__Planctomycetota	c__Phycisphaerae	o__Phycisphaerales	f__Phycisphaeraceae	g__norank_f__Phycisphaeraceae	s__uncultured_bacterium_g__norank_f__Phycisphaeraceae	OTU5293	1	1	0	0	0	0	0	0	0	0	1	0	3
d__Bacteria	k__norank_d__Bacteria	p__Firmicutes	c__Clostridia	o__Clostridiales	f__Oxobacteraceae	g__Oxobacter	s__uncultured_Clostridiales_bacterium_g__Oxobacter	OTU4871	1	1	0	0	1	0	2	1	1	0	0	0	7
d__Bacteria	k__norank_d__Bacteria	p__Patescibacteria	c__Saccharimonadia	o__Saccharimonadales	f__norank_o__Saccharimonadales	g__norank_f__norank_o__Saccharimonadales	s__uncultured_bacterium_g__norank_f__norank_o__Saccharimonadales	OTU1601	0	0	2	0	0	0	0	0	1	0	1	0	4
d__Bacteria	k__norank_d__Bacteria	p__Proteobacteria	c__Gammaproteobacteria	o__Xanthomonadales	f__Rhodanobacteraceae	g__Ahniella	s__uncultured_bacterium_g__Ahniella	OTU3172	0	0	0	0	0	1	0	0	0	0	1	0	2
d__Bacteria	k__norank_d__Bacteria	p__Actinobacteriota	c__Thermoleophilia	o__Solirubrobacterales	f__Solirubrobacteraceae	g__Solirubrobacter	s__uncultured_Solirubrobacter_sp._g__Solirubrobacter	OTU5495	11	16	23	10	28	19	23	19	7	16	5	14	191
d__Bacteria	k__norank_d__Bacteria	p__Actinobacteriota	c__Thermoleophilia	o__Solirubrobacterales	f__Solirubrobacteraceae	g__Conexibacter	s__unclassified_g__Conexibacter	OTU476	0	1	0	0	0	0	0	0	1	0	0	0	2
d__Bacteria	k__norank_d__Bacteria	p__Bacteroidota	c__Bacteroidia	o__Cytophagales	f__Hymenobacteraceae	g__Adhaeribacter	s__unclassified_g__Adhaeribacter	OTU2837	0	1	0	0	3	2	0	0	0	0	0	0	6
d__Bacteria	k__norank_d__Bacteria	p__Bdellovibrionota	c__Oligoflexia	o__0319-6G20	f__norank_o__0319-6G20	g__norank_f__norank_o__0319-6G20	s__uncultured_Roseobacter_sp._g__norank_f__norank	OTU5077	0	0	0	0	0	0	1	0	1	1	0	2	5
d__Bacteria	k__norank_d__Bacteria	p__Deinococcota	c__Deinococci	o__Deinococcales	f__Trueperaceae	g__Truepera	s__uncultured_bacterium_g__Truepera	OTU1584	3	1	1	6	2	6	0	0	0	6	7	0	32
d__Bacteria	k__norank_d__Bacteria	p__Acidobacteriota	c__Acidobacteriae	o__Solibacterales	f__Solibacteraceae	g__Candidatus_Solibacter	s__unclassified_g__Candidatus_Solibacter	OTU648	2	5	3	6	8	5	3	4	8	3	4	2	53
d__Bacteria	k__norank_d__Bacteria	p__Actinobacteriota	c__Rubrobacteria	o__Rubrobacterales	f__Rubrobacteriaceae	g__Rubrobacter	s__uncultured_bacterium_g__Rubrobacter	OTU694	2	1	2	1	0	0	2	3	2	1	1	3	18
d__Bacteria	k__norank_d__Bacteria	p__Planctomycetota	c__Planctomycetes	o__Gemmatales	f__Gemmataceae	g__norank_f__Gemmataceae	s__unclassified_g__norank_f__Gemmataceae	OTU1148	5	3	5	6	6	3	3	4	5	1	0	3	44
d__Bacteria	k__norank_d__Bacteria	p__Gemmatimonadota	c__Gemmatimonadetes	o__Gemmatimonadales	f__Gemmatimonadaceae	g__norank_f__Gemmatimonadaceae	s__unclassified_g__norank_f__Gemmatimonadaceae	OTU1633	65	57	66	45	52	37	88	59	78	73	73	82	775
d__Bacteria	k__norank_d__Bacteria	p__Chloroflexi	c__JG30-KF-CM66	o__norank_c__JG30-KF-CM66	f__norank_o__norank_c__JG30-KF-CM66	g__norank_f__norank_o__norank_c__JG30-KF-CM66	s__uncultured_bacterium_g__norank_f__norank_o__norank_c__JG30-KF-CM66	OTU3500	62	63	68	62	55	103	82	65	76	51	81	68	836
d__Bacteria	k__norank_d__Bacteria	p__Myxococcota	c__Polyangia	o__UASB-TL25	f__norank_o__UASB-TL25	g__norank_f__norank_o__UASB-TL25	s__unclassified_g__norank_f__norank_o__UASB-TL25	OTU3298	0	0	0	1	0	0	1	0	0	0	0	0	2
d__Bacteria	k__norank_d__Bacteria	p__Proteobacteria	c__Alphaproteobacteria	o__Rickettsiales	f__SM2D12	g__norank_f__SM2D12	s__metagenome_g__norank_f__SM2D12	OTU512	1	3	0	1	0	0	0	0	1	1	2	0	9
d__Bacteria	k__norank_d__Bacteria	p__Firmicutes	c__Dethiobacteria	o__Dethiobacterales	f__Dethiobacteraceae	g__norank_f__Dethiobacteraceae	s__uncultured_bacterium_g__norank_f__Dethiobacteraceae	OTU909	1	0	1	0	0	0	1	1	1	0	1	1	7
d__Bacteria	k__norank_d__Bacteria	p__Firmicutes	c__Clostridia	o__Oscillospirales	f__Ethanoligenenaceae	g__norank_f__Ethanoligenenaceae	s__Clostridium_cellulosi	OTU2040	0	1	0	1	0	0	0	0	0	0	0	0	2
d__Bacteria	k__norank_d__Bacteria	p__Actinobacteriota	c__Acidimicrobiia	o__Microtrichales	f__Microtrichaceae	g__norank_f__Microtrichaceae	s__unclassified_g__norank_f__Microtrichaceae	OTU2682	3	3	2	2	4	5	1	1	4	0	5	3	33
d__Bacteria	k__norank_d__Bacteria	p__Proteobacteria	c__Alphaproteobacteria	o__unclassified_c__Alphaproteobacteria	f__unclassified_c__Alphaproteobacteria	g__unclassified_c__Alphaproteobacteria	s__unclassified_c__Alphaproteobacteria	OTU1433	0	0	1	0	0	0	1	0	0	0	0	0	2
d__Bacteria	k__norank_d__Bacteria	p__Bacteroidota	c__Rhodothermia	o__Rhodothermales	f__Rhodothermaceae	g__norank_f__Rhodothermaceae	s__uncultured_bacterium_g__norank_f__Rhodothermaceae	OTU2662	1	1	1	2	1	1	1	0	1	0	4	0	13
d__Bacteria	k__norank_d__Bacteria	p__Gemmatimonadota	c__S0134_terrestrial_group	o__norank_c__S0134_terrestrial_group	f__norank_o__norank_c__S0134_terrestrial_group	g__norank_f__norank_o__norank_c__S0134_terrestrial_group	s__unclassified_g__norank_f__norank_o__norank_c__S0134_terrestrial_group	OTU4813	0	1	2	5	0	3	4	2	5	3	2	3	30
d__Bacteria	k__norank_d__Bacteria	p__Myxococcota	c__Polyangia	o__FFCH16767	f__norank_o__FFCH16767	g__norank_f__norank_o__FFCH16767	s__uncultured_bacterium_g__norank_f__norank_o__FFCH16767	OTU2533	0	0	0	0	3	0	0	0	1	0	2	0	6
d__Bacteria	k__norank_d__Bacteria	p__Chloroflexi	c__Anaerolineae	o__SBR1031	f__A4b	g__norank_f__A4b	s__unclassified_g__norank_f__A4b	OTU4651	0	0	0	1	0	3	0	2	0	1	1	0	8
d__Bacteria	k__norank_d__Bacteria	p__Nitrospirota	c__Leptospirillia	o__Leptospirillales	f__Leptospirillaceae	g__Leptospirillum	s__unclassified_g__Leptospirillum	OTU3979	1	1	0	0	2	0	2	0	1	1	1	0	9
d__Bacteria	k__norank_d__Bacteria	p__Firmicutes	c__Bacilli	o__Paenibacillales	f__Paenibacillaceae	g__Paenibacillus	s__unclassified_g__Paenibacillus	OTU5538	2	3	0	6	3	5	6	1	3	2	1	3	35
d__Bacteria	k__norank_d__Bacteria	p__Planctomycetota	c__Planctomycetes	o__Gemmatales	f__Gemmataceae	g__norank_f__Gemmataceae	s__unclassified_g__norank_f__Gemmataceae	OTU4669	0	0	0	0	0	0	0	1	1	0	0	0	2
d__Bacteria	k__norank_d__Bacteria	p__Actinobacteriota	c__Actinobacteria	o__0319-7L14	f__norank_o__0319-7L14	g__norank_f__norank_o__0319-7L14	s__unclassified_g__norank_f__norank_o__0319-7L14	OTU1937	7	2	5	8	2	5	6	3	3	6	7	7	61
d__Bacteria	k__norank_d__Bacteria	p__Proteobacteria	c__Gammaproteobacteria	o__Diplorickettsiales	f__Diplorickettsiaceae	g__Aquicella	s__uncultured_bacterium_g__Aquicella	OTU3989	0	0	0	0	0	0	1	0	0	0	1	0	2
d__Bacteria	k__norank_d__Bacteria	p__Planctomycetota	c__Planctomycetes	o__Gemmatales	f__Gemmataceae	g__unclassified_f__Gemmataceae	s__unclassified_f__Gemmataceae	OTU1780	10	3	7	6	10	3	4	7	12	4	6	11	83
d__Bacteria	k__norank_d__Bacteria	p__Bacteroidota	c__Bacteroidia	o__Flavobacteriales	f__Flavobacteriaceae	g__Flavobacterium	s__metagenome_g__Flavobacterium	OTU3864	8	18	10	16	5	9	25	14	14	16	11	2	148
d__Bacteria	k__norank_d__Bacteria	p__Planctomycetota	c__vadinHA49	o__norank_c__vadinHA49	f__norank_o__norank_c__vadinHA49	g__norank_f__norank_o__norank_c__vadinHA49	s__uncultured_bacterium_g__norank_f__norank_o__norank_c__vadinHA49	OTU4776	2	0	0	0	0	0	0	2	2	0	1	1	8
d__Bacteria	k__norank_d__Bacteria	p__Desulfobacterota	c__Desulfobulbia	o__Desulfobulbales	f__unclassified_o__Desulfobulbales	g__unclassified_o__Desulfobulbales	s__unclassified_o__Desulfobulbales	OTU106	0	1	0	0	0	0	0	0	0	0	0	0	1
d__Bacteria	k__norank_d__Bacteria	p__unclassified_k__norank_d__Bacteria	c__unclassified_k__norank_d__Bacteria	o__unclassified_k__norank_d__Bacteria	f__unclassified_k__norank_d__Bacteria	g__unclassified_k__norank_d__Bacteria	s__unclassified_k__norank_d__Bacteria	OTU5571	0	0	0	0	0	0	0	0	0	0	0	1	1
d__Bacteria	k__norank_d__Bacteria	p__Planctomycetota	c__Planctomycetes	o__Pirellulales	f__Pirellulaceae	g__norank_f__Pirellulaceae	s__unclassified_g__norank_f__Pirellulaceae	OTU1102	5	2	5	8	7	1	4	2	3	3	2	5	47
d__Bacteria	k__norank_d__Bacteria	p__Bdellovibrionota	c__Oligoflexia	o__Oligoflexales	f__norank_o__Oligoflexales	g__Oligoflexus	s__unclassified_g__Oligoflexus	OTU2690	5	6	1	7	9	2	3	4	3	0	0	2	42
d__Bacteria	k__norank_d__Bacteria	p__Myxococcota	c__Polyangia	o__Blfdi19	f__norank_o__Blfdi19	g__norank_f__norank_o__Blfdi19	s__unclassified_g__norank_f__norank_o__Blfdi19	OTU5418	0	0	0	0	0	0	0	0	0	0	1	2	3
d__Bacteria	k__norank_d__Bacteria	p__Planctomycetota	c__Planctomycetes	o__Isosphaerales	f__Isosphaeraceae	g__Isosphaera	s__uncultured_bacterium_g__Isosphaera	OTU3170	0	0	0	0	0	2	0	0	0	0	0	0	2
d__Bacteria	k__norank_d__Bacteria	p__Planctomycetota	c__Phycisphaerae	o__CCM11a	f__norank_o__CCM11a	g__norank_f__norank_o__CCM11a	s__uncultured_bacterium_g__norank_f__norank_o__CCM11a	OTU874	1	1	1	1	1	0	0	2	1	0	2	0	10
d__Bacteria	k__norank_d__Bacteria	p__Planctomycetota	c__OM190	o__norank_c__OM190	f__norank_o__norank_c__OM190	g__norank_f__norank_o__norank_c__OM190	s__uncultured_bacterium_g__norank_f__norank_o__norank_c__OM190	OTU2331	0	1	0	1	0	1	0	0	0	0	2	1	6
d__Bacteria	k__norank_d__Bacteria	p__Proteobacteria	c__Gammaproteobacteria	o__Steroidobacterales	f__Steroidobacteraceae	g__norank_f__Steroidobacteraceae	s__metagenome_g__norank_f__Steroidobacteraceae	OTU4244	2	1	2	2	1	0	3	0	2	1	1	2	17
d__Bacteria	k__norank_d__Bacteria	p__Acidobacteriota	c__Vicinamibacteria	o__Vicinamibacterales	f__norank_o__Vicinamibacterales	g__norank_f__norank_o__Vicinamibacterales	s__uncultured_Acidobacteria_bacterium_g__norank_f__norank_o__Vicinamibacterales	OTU3544	19	13	20	10	16	7	5	21	13	6	12	15	157
d__Bacteria	k__norank_d__Bacteria	p__Planctomycetota	c__Phycisphaerae	o__Phycisphaerales	f__Phycisphaeraceae	g__I-8	s__unclassified_g__I-8	OTU2452	0	0	0	0	0	1	0	2	0	0	0	0	3
d__Bacteria	k__norank_d__Bacteria	p__Planctomycetota	c__Planctomycetes	o__Planctomycetales	f__norank_o__Planctomycetales	g__norank_f__norank_o__Planctomycetales	s__unclassified_g__norank_f__norank_o__Planctomycetales	OTU760	3	1	2	7	1	0	1	1	4	4	2	2	28
d__Bacteria	k__norank_d__Bacteria	p__Planctomycetota	c__Planctomycetes	o__Gemmatales	f__Gemmataceae	g__norank_f__Gemmataceae	s__uncultured_bacterium_g__norank_f__Gemmataceae	OTU5592	0	0	0	0	0	0	0	0	1	0	0	1	2
d__Bacteria	k__norank_d__Bacteria	p__Proteobacteria	c__Gammaproteobacteria	o__KF-JG30-C25	f__norank_o__KF-JG30-C25	g__norank_f__norank_o__KF-JG30-C25	s__uncultured_bacterium_g__norank_f__norank_o__KF-JG30-C25	OTU3007	1	3	0	0	1	1	1	0	0	0	0	0	7
d__Bacteria	k__norank_d__Bacteria	p__Planctomycetota	c__Planctomycetes	o__Isosphaerales	f__Isosphaeraceae	g__norank_f__Isosphaeraceae	s__uncultured_bacterium_g__norank_f__Isosphaeraceae	OTU56	0	0	0	0	0	1	0	0	0	0	0	1	2
d__Bacteria	k__norank_d__Bacteria	p__Chloroflexi	c__Anaerolineae	o__Ardenticatenales	f__Ardenticatenaceae	g__norank_f__Ardenticatenaceae	s__unclassified_g__norank_f__Ardenticatenaceae	OTU4520	0	1	0	0	0	0	0	1	1	0	0	0	3
d__Bacteria	k__norank_d__Bacteria	p__Planctomycetota	c__OM190	o__norank_c__OM190	f__norank_o__norank_c__OM190	g__norank_f__norank_o__norank_c__OM190	s__unclassified_g__norank_f__norank_o__norank_c__OM190	OTU1845	0	0	0	1	0	1	0	0	1	0	1	0	4
d__Bacteria	k__norank_d__Bacteria	p__Chloroflexi	c__Anaerolineae	o__Anaerolineales	f__Anaerolineaceae	g__norank_f__Anaerolineaceae	s__unclassified_g__norank_f__Anaerolineaceae	OTU4434	0	1	0	0	0	0	1	2	0	0	0	2	6
d__Bacteria	k__norank_d__Bacteria	p__Actinobacteriota	c__Actinobacteria	o__Propionibacteriales	f__Nocardioidaceae	g__Nocardioides	s__unclassified_g__Nocardioides	OTU2398	189	137	203	259	207	226	294	173	152	261	188	186	2475
d__Bacteria	k__norank_d__Bacteria	p__Chloroflexi	c__TK10	o__norank_c__TK10	f__norank_o__norank_c__TK10	g__norank_f__norank_o__norank_c__TK10	s__unclassified_g__norank_f__norank_o__norank_c__TK10	OTU1251	7	7	10	12	17	18	1	4	17	10	15	7	125
d__Bacteria	k__norank_d__Bacteria	p__Myxococcota	c__bacteriap25	o__norank_c__bacteriap25	f__norank_o__norank_c__bacteriap25	g__norank_f__norank_o__norank_c__bacteriap25	s__uncultured_Geobacter_sp._g__norank_f__norank_o__norank	OTU1149	0	1	4	0	1	0	0	2	0	1	0	1	10
d__Bacteria	k__norank_d__Bacteria	p__Acidobacteriota	c__Blastocatellia	o__Blastocatellales	f__Blastocatellaceae	g__Blastocatella	s__uncultured_Acidobacteria_bacterium_g__Blastocatella	OTU2689	0	1	0	1	1	0	0	0	0	1	0	0	4
d__Bacteria	k__norank_d__Bacteria	p__Bacteroidota	c__Bacteroidia	o__Sphingobacteriales	f__Sphingobacteriaceae	g__Sphingobacterium	s__Sphingobacterium_mizutaii	OTU2529	2	7	1	6	4	6	0	0	0	1	3	2	32
d__Bacteria	k__norank_d__Bacteria	p__Planctomycetota	c__Planctomycetes	o__Pirellulales	f__Pirellulaceae	g__Pirellula	s__unclassified_g__Pirellula	OTU1169	5	4	0	2	0	1	1	5	3	1	0	3	25
d__Bacteria	k__norank_d__Bacteria	p__Planctomycetota	c__Phycisphaerae	o__Phycisphaerales	f__Phycisphaeraceae	g__SM1A02	s__unclassified_g__SM1A02	OTU1069	4	1	2	0	3	0	2	4	1	0	0	3	20
d__Bacteria	k__norank_d__Bacteria	p__Actinobacteriota	c__Actinobacteria	o__Propionibacteriales	f__Nocardioidaceae	g__unclassified_f__Nocardioidaceae	s__unclassified_f__Nocardioidaceae	OTU3940	4	1	6	7	5	7	5	9	9	9	13	10	85
d__Bacteria	k__norank_d__Bacteria	p__Acidobacteriota	c__Acidobacteriae	o__PAUC26f	f__norank_o__PAUC26f	g__norank_f__norank_o__PAUC26f	s__uncultured_Acidobacteria_bacterium_g__norank_f__norank_o__PAUC26f	OTU4174	2	3	0	0	0	1	1	2	1	0	0	1	11
d__Bacteria	k__norank_d__Bacteria	p__Bacteroidota	c__Bacteroidia	o__Flavobacteriales	f__Crocinitomicaceae	g__Fluviicola	s__unclassified_g__Fluviicola	OTU4659	0	0	0	0	0	1	0	1	0	0	1	2	5
d__Bacteria	k__norank_d__Bacteria	p__Dependentiae	c__Babeliae	o__Babeliales	f__Vermiphilaceae	g__norank_f__Vermiphilaceae	s__unclassified_g__norank_f__Vermiphilaceae	OTU2778	1	1	1	0	1	0	1	1	2	2	3	1	14
d__Bacteria	k__norank_d__Bacteria	p__Dependentiae	c__Babeliae	o__Babeliales	f__Vermiphilaceae	g__norank_f__Vermiphilaceae	s__unclassified_g__norank_f__Vermiphilaceae	OTU2777	0	1	1	1	1	0	1	0	0	0	1	0	6
d__Bacteria	k__norank_d__Bacteria	p__Proteobacteria	c__Alphaproteobacteria	o__AT-s3-44	f__norank_o__AT-s3-44	g__norank_f__norank_o__AT-s3-44	s__metagenome_g__norank_f__norank_o__AT-s3-44	OTU1983	0	2	1	1	0	0	0	0	0	0	1	1	6
d__Bacteria	k__norank_d__Bacteria	p__Proteobacteria	c__Alphaproteobacteria	o__unclassified_c__Alphaproteobacteria	f__unclassified_c__Alphaproteobacteria	g__unclassified_c__Alphaproteobacteria	s__unclassified_c__Alphaproteobacteria	OTU4429	0	0	1	0	0	0	1	1	0	0	0	0	3
d__Bacteria	k__norank_d__Bacteria	p__Verrucomicrobiota	c__Verrucomicrobiae	o__Pedosphaerales	f__Pedosphaeraceae	g__norank_f__Pedosphaeraceae	s__unclassified_g__norank_f__Pedosphaeraceae	OTU1673	1	1	1	0	0	0	0	0	0	0	0	1	4
d__Bacteria	k__norank_d__Bacteria	p__Acidobacteriota	c__AT-s3-28	o__norank_c__AT-s3-28	f__norank_o__norank_c__AT-s3-28	g__norank_f__norank_o__norank_c__AT-s3-28	s__uncultured_bacterium_g__norank_f__norank_o__norank_c__AT-s3-28	OTU2566	2	1	1	0	2	2	0	1	3	0	0	0	12
d__Bacteria	k__norank_d__Bacteria	p__Bacteroidota	c__Bacteroidia	o__Cytophagales	f__Microscillaceae	g__Ohtaekwangia	s__metagenome_g__Ohtaekwangia	OTU2144	0	0	0	0	0	0	0	0	0	0	0	1	1
d__Bacteria	k__norank_d__Bacteria	p__Proteobacteria	c__Alphaproteobacteria	o__Rhizobiales	f__Rhizobiales_Incertae_Sedis	g__Bauldia	s__uncultured_bacterium_g__Bauldia	OTU844	47	42	51	43	48	47	62	38	37	72	53	38	578
d__Bacteria	k__norank_d__Bacteria	p__Chloroflexi	c__Anaerolineae	o__Ardenticatenales	f__Ardenticatenaceae	g__norank_f__Ardenticatenaceae	s__unclassified_g__norank_f__Ardenticatenaceae	OTU2800	5	6	3	6	7	8	4	5	4	4	5	8	65
d__Bacteria	k__norank_d__Bacteria	p__Bacteroidota	c__Rhodothermia	o__Rhodothermales	f__Rhodothermaceae	g__norank_f__Rhodothermaceae	s__unclassified_g__norank_f__Rhodothermaceae	OTU2992	0	0	0	0	1	0	0	0	0	0	1	0	2
d__Bacteria	k__norank_d__Bacteria	p__Myxococcota	c__bacteriap25	o__norank_c__bacteriap25	f__norank_o__norank_c__bacteriap25	g__norank_f__norank_o__norank_c__bacteriap25	s__unclassified_g__norank_f__norank_o__norank_c__bacteriap25	OTU2142	1	1	1	0	2	0	2	3	2	3	0	2	17
d__Bacteria	k__norank_d__Bacteria	p__Proteobacteria	c__Alphaproteobacteria	o__Rhizobiales	f__Rhizobiaceae	g__unclassified_f__Rhizobiaceae	s__unclassified_f__Rhizobiaceae	OTU4075	49	39	39	51	36	49	36	25	36	34	45	32	471
d__Bacteria	k__norank_d__Bacteria	p__Proteobacteria	c__Alphaproteobacteria	o__Rickettsiales	f__SM2D12	g__norank_f__SM2D12	s__uncultured_Phyllobacteriaceae_bacterium_g__norank	OTU1444	0	3	0	0	1	0	0	0	0	0	3	0	7
d__Bacteria	k__norank_d__Bacteria	p__Proteobacteria	c__Alphaproteobacteria	o__Elsterales	f__norank_o__Elsterales	g__norank_f__norank_o__Elsterales	s__uncultured_Alphaproteobacteria_bacterium_g__norank_f__norank_o__Elsterales	OTU4358	2	3	3	2	1	0	4	0	6	4	2	5	32
d__Bacteria	k__norank_d__Bacteria	p__Firmicutes	c__Clostridia	o__Peptostreptococcales-Tissierellales	f__norank_o__Peptostreptococcales-Tissierellales	g__Tepidimicrobium	s__Tepidimicrobium_sp._SC-1	OTU4600	1	1	0	2	0	0	0	1	1	2	2	0	10
d__Bacteria	k__norank_d__Bacteria	p__Planctomycetota	c__Planctomycetes	o__Pirellulales	f__Pirellulaceae	g__norank_f__Pirellulaceae	s__unclassified_g__norank_f__Pirellulaceae	OTU485	0	1	0	0	0	1	0	1	1	0	1	0	5
d__Bacteria	k__norank_d__Bacteria	p__Acidobacteriota	c__Vicinamibacteria	o__Vicinamibacterales	f__norank_o__Vicinamibacterales	g__norank_f__norank_o__Vicinamibacterales	s__metagenome_g__norank_f__norank_o__Vicinamibacterales	OTU5271	2	1	2	1	0	4	0	1	1	3	2	2	19
d__Bacteria	k__norank_d__Bacteria	p__unclassified_k__norank_d__Bacteria	c__unclassified_k__norank_d__Bacteria	o__unclassified_k__norank_d__Bacteria	f__unclassified_k__norank_d__Bacteria	g__unclassified_k__norank_d__Bacteria	s__unclassified_k__norank_d__Bacteria	OTU3108	0	0	0	0	1	1	0	0	0	1	0	0	3
d__Bacteria	k__norank_d__Bacteria	p__Chloroflexi	c__Anaerolineae	o__Anaerolineales	f__Anaerolineaceae	g__unclassified_f__Anaerolineaceae	s__unclassified_f__Anaerolineaceae	OTU1363	1	0	0	2	1	2	1	2	1	2	2	1	15
d__Bacteria	k__norank_d__Bacteria	p__Chloroflexi	c__Chloroflexia	o__Thermomicrobiales	f__Thermomicrobiaceae	g__Nitrolancea	s__unclassified_g__Nitrolancea	OTU3886	0	1	1	0	1	0	1	1	4	2	1	1	13
d__Bacteria	k__norank_d__Bacteria	p__Chloroflexi	c__Anaerolineae	o__SBR1031	f__norank_o__SBR1031	g__norank_f__norank_o__SBR1031	s__unclassified_g__norank_f__norank_o__SBR1031	OTU5433	1	0	0	0	0	1	1	0	0	0	3	0	6
d__Bacteria	k__norank_d__Bacteria	p__Chloroflexi	c__unclassified_p__Chloroflexi	o__unclassified_p__Chloroflexi	f__unclassified_p__Chloroflexi	g__unclassified_p__Chloroflexi	s__unclassified_p__Chloroflexi	OTU4359	4	4	3	3	7	8	7	7	3	10	5	6	67
d__Bacteria	k__norank_d__Bacteria	p__Proteobacteria	c__Alphaproteobacteria	o__Holosporales	f__Holosporaceae	g__norank_f__Holosporaceae	s__uncultured_bacterium_g__norank_f__Holosporaceae	OTU1293	2	1	1	2	3	1	1	1	0	2	2	0	16
d__Bacteria	k__norank_d__Bacteria	p__Planctomycetota	c__Phycisphaerae	o__Tepidisphaerales	f__WD2101_soil_group	g__norank_f__WD2101_soil_group	s__unclassified_g__norank_f__WD2101_soil_group	OTU2491	6	2	5	11	2	4	4	9	2	1	6	6	58
d__Bacteria	k__norank_d__Bacteria	p__Actinobacteriota	c__Acidimicrobiia	o__IMCC26256	f__norank_o__IMCC26256	g__norank_f__norank_o__IMCC26256	s__unclassified_g__norank_f__norank_o__IMCC26256	OTU5026	0	1	1	1	2	1	1	2	2	3	2	0	16
d__Bacteria	k__norank_d__Bacteria	p__Firmicutes	c__Limnochordia	o__M55-D21	f__norank_o__M55-D21	g__norank_f__norank_o__M55-D21	s__unclassified_g__norank_f__norank_o__M55-D21	OTU2502	0	1	0	0	2	0	0	0	0	1	0	1	5
d__Bacteria	k__norank_d__Bacteria	p__unclassified_k__norank_d__Bacteria	c__unclassified_k__norank_d__Bacteria	o__unclassified_k__norank_d__Bacteria	f__unclassified_k__norank_d__Bacteria	g__unclassified_k__norank_d__Bacteria	s__unclassified_k__norank_d__Bacteria	OTU4826	0	0	0	1	1	0	0	1	0	0	0	0	3
d__Bacteria	k__norank_d__Bacteria	p__Proteobacteria	c__Alphaproteobacteria	o__Azospirillales	f__norank_o__Azospirillales	g__norank_f__norank_o__Azospirillales	s__uncultured_bacterium_g__norank_f__norank_o__Azospirillales	OTU4750	117	98	111	98	87	84	151	144	143	141	109	107	1390
d__Bacteria	k__norank_d__Bacteria	p__Firmicutes	c__Clostridia	o__Clostridiales	f__Caloramatoraceae	g__Fonticella	s__uncultured_bacterium_g__Fonticella	OTU426	0	1	0	0	0	0	0	0	1	0	0	0	2
d__Bacteria	k__norank_d__Bacteria	p__Bdellovibrionota	c__Bdellovibrionia	o__Bdellovibrionales	f__Bdellovibrionaceae	g__Bdellovibrio	s__uncultured_bacterium_g__Bdellovibrio	OTU4829	1	0	0	0	0	0	0	1	0	0	2	0	4
d__Bacteria	k__norank_d__Bacteria	p__Planctomycetota	c__vadinHA49	o__norank_c__vadinHA49	f__norank_o__norank_c__vadinHA49	g__norank_f__norank_o__norank_c__vadinHA49	s__uncultured_bacterium_g__norank_f__norank_o__norank_c__vadinHA49	OTU5380	5	3	5	0	1	1	1	5	4	3	2	1	31
d__Bacteria	k__norank_d__Bacteria	p__Planctomycetota	c__BD7-11	o__norank_c__BD7-11	f__norank_o__norank_c__BD7-11	g__norank_f__norank_o__norank_c__BD7-11	s__uncultured_bacterium_g__norank_f__norank_o__norank_c__BD7-11	OTU3996	0	1	0	0	0	0	1	0	1	0	0	0	3
d__Bacteria	k__norank_d__Bacteria	p__Actinobacteriota	c__Thermoleophilia	o__Solirubrobacterales	f__Solirubrobacteraceae	g__Conexibacter	s__metagenome_g__Conexibacter	OTU4287	6	5	5	10	3	3	3	1	5	3	5	6	55
d__Bacteria	k__norank_d__Bacteria	p__Bacteroidota	c__Bacteroidia	o__Cytophagales	f__Microscillaceae	g__norank_f__Microscillaceae	s__unclassified_g__norank_f__Microscillaceae	OTU3552	25	27	33	37	24	22	54	28	23	26	27	30	356
d__Bacteria	k__norank_d__Bacteria	p__Planctomycetota	c__unclassified_p__Planctomycetota	o__unclassified_p__Planctomycetota	f__unclassified_p__Planctomycetota	g__unclassified_p__Planctomycetota	s__unclassified_p__Planctomycetota	OTU276	0	1	0	0	0	1	0	1	0	0	0	0	3
d__Bacteria	k__norank_d__Bacteria	p__Chloroflexi	c__Dehalococcoidia	o__SAR202_clade	f__norank_o__SAR202_clade	g__norank_f__norank_o__SAR202_clade	s__unclassified_g__norank_f__norank_o__SAR202_clade	OTU1796	10	11	11	7	8	10	8	12	13	12	22	10	134
d__Bacteria	k__norank_d__Bacteria	p__Planctomycetota	c__Pla4_lineage	o__norank_c__Pla4_lineage	f__norank_o__norank_c__Pla4_lineage	g__norank_f__norank_o__norank_c__Pla4_lineage	s__unclassified_g__norank_f__norank_o__norank_c__Pla4_lineage	OTU1216	0	0	1	0	0	0	0	1	0	0	0	0	2
d__Bacteria	k__norank_d__Bacteria	p__Patescibacteria	c__Saccharimonadia	o__Saccharimonadales	f__LWQ8	g__norank_f__LWQ8	s__uncultured_bacterium_g__norank_f__LWQ8	OTU1992	3	2	5	3	7	3	3	1	3	3	2	6	41
d__Bacteria	k__norank_d__Bacteria	p__Planctomycetota	c__Planctomycetes	o__Pirellulales	f__Pirellulaceae	g__norank_f__Pirellulaceae	s__metagenome_g__norank_f__Pirellulaceae	OTU1378	4	0	5	5	1	1	1	2	2	0	4	3	28
[truncated: 3,816 more rows]

## Sheet: Table S11 Fungal community
Table S11 The OTU data of fungal community. WS:Winter-Spring season; AW:Autumn-Winter season; C:Cucumber monocropping; CA:Cucumber-Amaranth intercropping
[truncated: 1,294 more rows]
